# Supplementary material for: Synthesis of tertiary alkylphosphonate oligonucleotides through light-driven radical-polar crossover reactions
Source: PubMed Central journal article supplement (PMC10618202; doi:10.1038/s41467-023-42639-y), 2023-10-31
Supplement: 41467_2023_42639_MOESM1_ESM.pdf [file 41467_2023_42639_MOESM1_ESM.pdf]

**Supplementary Information for  
Synthesis of *tert*-alkylphosphonate oligonucleotides through  
light-driven radical-polar crossover**

Kenji Ota, Kazunori Nagao, Dai Hata, Haruki Sugiyama, Yasutomo Segawa, Ryosuke Tokunoh,  
Tomohiro Seki, Naoya Miyamoto, Yusuke Sasaki, and Hirohisa Ohmiya

**Table of Contents**

■ **Supplementary Methods** ■

|                                                                                      |         |
|--------------------------------------------------------------------------------------|---------|
| 1. Instrumentation and Chemicals                                                     | S2      |
| 2. Characterization Data for Redox-Active Esters                                     | S3–S4   |
| 3. General Procedure for Synthesis of Phosphites                                     | S4      |
| 4. Characterization Data for Phosphites and the Synthetic Intermediates              | S5–S14  |
| 5. General Procedure for Synthesis of <i>tert</i> -Alkylphosphonate Oligonucleotides | S14     |
| 6. Characterization Data for Alkylated Products                                      | S14–S23 |
| 7. X-ray structures of <b>3aa</b>                                                    | S24–S25 |
| 8. Derivatization of <i>tert</i> -Alkylphosphonates to the Phosphoramidites          | S26–S27 |
| 9. Characterization Data for Phosphoramidites                                        | S27–S29 |
| 10. Procedure for Automated Solid-Support Synthesis of Oligonucleotides              | S30–S47 |
| 11. Detection of Alkylsulfonium                                                      | S48     |
| 12. Effects of Additives on Conversion of Redox-Active Esters                        | S48     |
| 13. Comparison with Other Carbocation Methods                                        | S48–S49 |
| 14. The Effects of Chiral Leaving Groups                                             | S49     |
| 15. Examination of Catalytic Reactions                                               | S49–S50 |
| 16. Examination of the Addition of Trapping Reagent for Carbocation                  | S50     |
| 17. Unsuccessful Substrates                                                          | S51     |

■ **NMR Spectra** ■ S52–S190

■ **Supplementary References** ■ S191

## ■ Supplementary Methods ■

### 1. Instrumentation and Chemicals

NMR spectra were recorded on a Bruker AVANCE NEO 400N spectrometer, operating at 400 MHz for  $^1\text{H}$  NMR, 100.6 MHz for  $^{13}\text{C}$  NMR, and 162 MHz for  $^{31}\text{P}$  NMR. Chemical shift values for  $^1\text{H}$  and  $^{13}\text{C}$  are referenced to  $\text{Me}_4\text{Si}$  and the residual solvent resonances, respectively. Chemical shifts were reported in  $\delta$  ppm. Mass spectra were obtained with Bruker Impact HD mass spectrometer (ESI). TLC analyses were performed on commercial glass plates bearing a 0.25-mm layer of Merck Silica gel 60F<sub>254</sub>. Silica gel (Wakosil® 60, 64~210  $\mu\text{m}$ ) was used for column chromatography. Biotage Selekt was used for purification. Gilson GX-281 was used as a Preparative HPLC. The column was YMCActus Triart C18 (50×20 mmI.D., 5  $\mu\text{m}$ ) with a flow rate of 25 mL/min at room temperature. Melting points were measured on a Stanford Research Systems MPA100. Kessil A160WE 40W Tuna Blue (highest blue and intensity setting) was used as a light source. Techno Sigma UCR-150N was used as a cryocooler. TEKNOS MG9 was used as a fan.

For Prep-HPLC, Waters MS-trigger HPLC systems equipped with YMC-Actus Triart C18 (30 mm ID × 100 mm L, 5  $\mu\text{m}$ ) column and Waters Acquity QDa MS detector were used. The eluent was 10mM  $\text{NH}_4\text{HCO}_3$  aq./MeCN. GeneDesign ns8-II oligosynthesizer was used for the automated solid-support synthesis of oligonucleotides. Oligonucleotides were analyzed for characterization by a Waters Xevo G2-XS Qtof UPLC-MS system (ESI-Qtof) with a ACQUITY UPLC OST C18 (1.7  $\mu\text{m}$ , 2.1 x 50 mm) column. The eluent was 240 mM hexafluoroisopropanol/7 mM triethylamine aqueous solution containing 5% MeOH and the methanolic solution (100% MeOH). For distillation of volatile components, a Thermo Scientific SAVANT SPD2010 SpeedVac Concentrator was used. Quantification of oligonucleotides was conducted based on UV absorbance measurement on Unchained Labs LUNATIC.

All reactions were carried out under nitrogen atmosphere. Materials were obtained from commercial suppliers or prepared according to standard procedures unless otherwise noted. **PTH1** and **PTH3** were prepared by the reported procedure.<sup>1</sup> **PTH2** was prepared by the methylation of benzo[*b*]phenothiazine with iodomethane.<sup>2</sup> **PTH4** was prepared by the reported procedure.<sup>3</sup>  $\text{LiBF}_4$ ,  $\text{NaBF}_4$  and  $\text{LiPF}_6$  were purchased from Tokyo Chemical Industry Co., stored under nitrogen, and used as received. MeCN, DCM, DMF, THF and toluene were purchased from FUJIFILM Wako Pure Chemical Co., stored under nitrogen, and used as received. Alcohol **S1-1** was prepared by the reported procedure.<sup>4</sup> Alcohol **S1-2** was prepared by the reported procedure.<sup>5</sup> Alcohol **S1-3** was prepared by the reported procedure.<sup>6</sup> Phosphordiamidite **S2-3** was purchased from Tokyo Chemical Industry Co., stored under nitrogen, and used as received. Redox-active esters **2a-2k** were prepared according to the reported procedure.<sup>7</sup> Thymine was purchased from Tokyo Chemical Industry Co., stored under nitrogen, and used as received. 4CzIPN was prepared by the reported procedure.<sup>8</sup> Trifluoroacetic acid (TFA) was purchased from Nacalai Tesque Inc., stored under nitrogen, and used as received. 2-Phenyl-2-propanol (**5a**) was purchased from Tokyo Chemical Industry Co., stored under nitrogen, and used as received. Trimethylsilyl trifluoromethanesulfonate (TMSOTf) was purchased from Tokyo Chemical Industry Co., zinc iodide ( $\text{ZnI}_2$ ) was purchased from FUJIFILM Wako Pure Chemical Co., stored under nitrogen, and used as received. Phosphites **1g** and **1h** were purchased from Tokyo Chemical Industry Co., stored under nitrogen, and used as received.

## 2. Characterization Data for Redox-Active Esters

### 1,3-Dioxoisindolin-2-yl 2-(4-Bromophenyl)-2-methylpropanoate (2b)

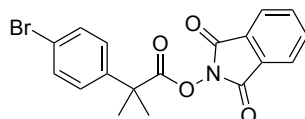

White solid. **M.p.** 125–127 °C.  $^1\text{H NMR}$  (400 MHz,  $\text{CDCl}_3$ )  $\delta$  7.88–7.85 (m, 2H), 7.80–7.76 (m, 2H), 7.56–7.52 (m, 2H), 7.39–7.35 (m, 2H), 1.76 (s, 6H).  $^{13}\text{C NMR}$  (100.6 MHz,  $\text{CDCl}_3$ )  $\delta$  172.7, 161.9, 141.6, 134.7, 131.8, 128.9, 127.6, 123.9, 121.5, 46.0, 26.7. **HRMS–ESI** ( $m/z$ ):  $[\text{M}+\text{H}]^+$  calcd for  $\text{C}_{18}\text{H}_{15}\text{BrNO}_4$ , 388.0179; found, 388.0187.

### 1,3-Dioxoisindolin-2-yl 1-Phenylcyclobutane-1-carboxylate (2c)

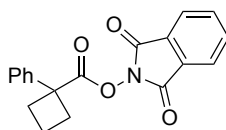

White solid. **M.p.** 93–96 °C.  $^1\text{H NMR}$  (400 MHz,  $\text{CDCl}_3$ )  $\delta$  7.86–7.84 (m, 2H), 7.77–7.75 (m, 2H), 7.45–7.40 (m, 4H), 7.32 (m, 1H), 3.11–3.04 (m, 2H), 2.74–2.67 (m, 2H), 2.25 (m, 1H), 2.01 (m, 1H).  $^{13}\text{C NMR}$  (100.6 MHz,  $\text{CDCl}_3$ )  $\delta$  172.2, 161.9, 141.1, 134.6, 129.0, 128.6, 127.4, 126.4, 123.8, 50.9, 32.6, 16.8. **HRMS–ESI** ( $m/z$ ):  $[\text{M}+\text{NH}_4]^+$  calcd for  $\text{C}_{19}\text{H}_{19}\text{N}_2\text{O}_4$ , 339.1339; found, 339.1337.

### 1,3-Dioxoisindolin-2-yl 1-Phenylcyclopentane-1-carboxylate (2d)

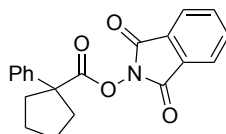

White solid. **M.p.** 84–87 °C.  $^1\text{H NMR}$  (400 MHz,  $\text{CDCl}_3$ )  $\delta$  7.85–7.83 (m, 2H), 7.77–7.75 (m, 2H), 7.50–7.48 (m, 2H), 7.42–7.39 (m, 2H), 7.33 (m, 1H), 2.82–2.76 (m, 2H), 2.17–2.10 (m, 2H), 1.95–1.84 (m, 4H).  $^{13}\text{C NMR}$  (100.6 MHz,  $\text{CDCl}_3$ )  $\delta$  172.6, 162.0, 141.1, 134.6, 129.0, 128.6, 127.4, 126.8, 123.8, 58.0, 37.1, 23.8. **HRMS–ESI** ( $m/z$ ):  $[\text{M}+\text{NH}_4]^+$  calcd for  $\text{C}_{20}\text{H}_{21}\text{N}_2\text{O}_4$ , 353.1496; found, 353.1501.

### 1,3-Dioxoisindolin-2-yl 4-Phenyltetrahydro-2H-pyran-4-carboxylate (2e)

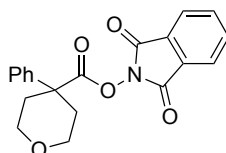

White solid. **M.p.** 122–124 °C.  $^1\text{H NMR}$  (400 MHz,  $\text{CDCl}_3$ )  $\delta$  7.88–7.85 (m, 2H), 7.79–7.77 (m, 2H), 7.53–7.51 (m, 2H), 7.47–7.43 (m, 2H), 7.37 (m, 1H), 4.07–4.02 (m, 2H), 3.88–3.81 (m, 2H), 2.65–2.61 (m, 2H), 2.21–2.14 (m, 2H).  $^{13}\text{C NMR}$  (100.6 MHz,  $\text{CDCl}_3$ )  $\delta$  171.0, 161.8, 140.7, 134.8, 129.0, 128.9, 128.0, 125.8, 123.9, 65.3, 48.9, 34.8. **HRMS–ESI** ( $m/z$ ):  $[\text{M}+\text{H}]^+$  calcd for  $\text{C}_{20}\text{H}_{18}\text{NO}_5$ , 352.1179; found, 352.1175.

### 1,3-Dioxoisindolin-2-yl 2,2-Diphenylpropanoate (2g)

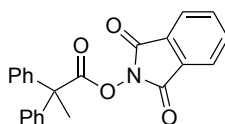

White solid. **M.p.** 114–118 °C.  $^1\text{H NMR}$  (400 MHz,  $\text{CDCl}_3$ )  $\delta$  7.88–7.86 (m, 2H), 7.78–7.76 (m, 2H), 7.44–7.30 (m, 10H), 2.17 (s, 3H).  $^{13}\text{C NMR}$  (100.6 MHz,  $\text{CDCl}_3$ )  $\delta$  171.9, 161.9, 142.3, 134.7, 129.0, 128.4, 128.0, 127.5, 123.9, 55.8, 27.1. **HRMS–ESI** ( $m/z$ ):  $[\text{M}+\text{NH}_4]^+$  calcd for  $\text{C}_{23}\text{H}_{21}\text{N}_2\text{O}_4$ , 389.1496; found, 389.1506.

### 1,3-Dioxoisindolin-2-yl 2-Methyl-2-phenoxypropanoate (2j)

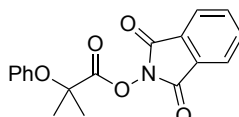

White solid. **M.p.** 74–77 °C.  $^1\text{H NMR}$  (400 MHz,  $\text{CDCl}_3$ )  $\delta$  7.92–7.89 (m, 2H), 7.81–7.79 (m, 2H), 7.35–7.31 (m, 2H), 7.11–7.06 (m, 3H), 1.79 (s, 6H).  $^{13}\text{C NMR}$  (100.6 MHz,  $\text{CDCl}_3$ )  $\delta$  170.9, 161.8, 154.6, 134.8, 129.4, 128.9, 124.0, 123.2, 120.2, 78.6, 25.7. **HRMS–ESI** ( $m/z$ ):  $[\text{M}+\text{NH}_4]^+$  calcd for  $\text{C}_{18}\text{H}_{19}\text{N}_2\text{O}_5$ , 343.1288; found, 343.1287.

## 3. General Procedure for Synthesis of Phosphites

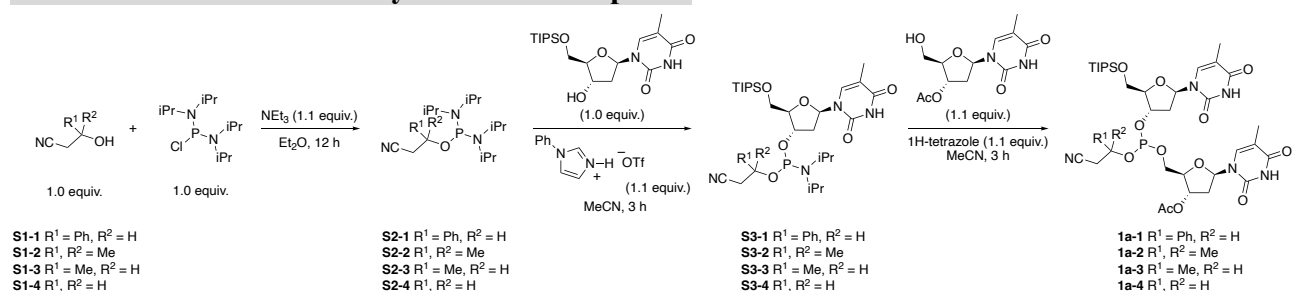

Supplementary Fig. 1. Synthesis of phosphites

**Synthesis of 1a-1 as a representative (Supplementary Fig. 1).** Phosphordiamidite **S2-1** was prepared according to the literature.<sup>9</sup> To a solution of 5'-*O*-TIPS thymidine (1.0 g, 2.5 mmol) and phosphordiamidite **S2-1** (0.94 g, 2.5 mmol) in MeCN (20 mL), 1-phenyl-1*H*-imidazol-3-ium trifluoromethanesulfonate (0.81 g, 2.75 mmol) was added. The reaction mixture was stirred for 3 h at room temperature under a nitrogen atmosphere. After the solvent was removed under reduced pressure, purification by flash column chromatography on silica gel (Biotage Selekt, 95:5–70:30, hexane/EtOAc) gave the phosphoramidite **S3-1** as a white amorphous solid (1.23 g, 1.82 mmol, 73%).

To a solution of phosphoramidite **S3-1** (1.22 g, 1.82 mmol) and 3'-*O*-Ac thymidine (0.57 g, 2.0 mmol) in MeCN (7 mL), 1*H*-tetrazole (0.14 g, 2.0 mmol) was added. The reaction mixture was stirred for 3 h at room temperature under a nitrogen atmosphere. After the filtrate was concentrated under reduced pressure, purification by flash column chromatography on silica gel (Biotage Selekt, 50:50:0–50:40:10, hexane/EtOAc/MeOH) gave the phosphite **1a-1** (1.37 g, 1.60 mmol, 88%) as a white amorphous solid.



#### 4. Characterization Data for Phosphites and the Synthetic Intermediates

##### 3-[[Bis(diisopropylamino)phosphaneyl]oxy]-3-phenylpropanenitrile (S2-1)

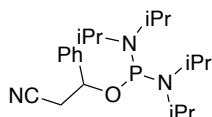

**S2-1** was purified by flash chromatography on silica gel (70:29:1, hexane/EtOAc/NEt<sub>3</sub>) (Supplementary Fig. 1; 10 mmol scale; 3.24 g, 8.58 mmol, 86% isolated yield). White solid. The spectrum data of **S2-1** was consistent with the literature.<sup>9</sup>

##### Phosphoramidite (S3-1)

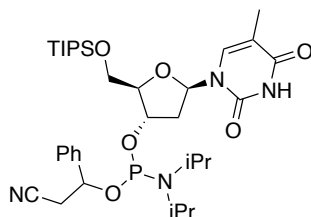

**S3-1** was purified by flash chromatography on silica gel (Biotage Selekt, 95:5–70:30, hexane/EtOAc) (Supplementary Fig 1; 2.5 mmol scale; 1.23 g, 1.82 mmol, 73% isolated yield). The ratio (2:2:1:1) of diastereomers was determined by <sup>31</sup>P-NMR analysis. White amorphous solid. <sup>1</sup>H NMR (400 MHz, CDCl<sub>3</sub>) δ 8.21 (brs, 1H), 7.48–7.31 (m, 6H), 6.37 (m, 0.33H), 6.15 (m, 0.67H), 5.00 (m, 1H), 4.65 (m, 0.33H), 4.40 (m, 0.67H), 4.11 (m, 0.33H), 4.01–3.87 (m, 1.33H), 3.81–3.51 (m, 3.34H), 2.82–2.75 (m, 2H), 2.47 (m, 0.33H), 2.27 (m, 0.33H), 2.15 (m, 0.67H), 1.96–1.81 (m, 3.67H), 1.28–0.96 (m, 33H). <sup>13</sup>C NMR (100.6 MHz, CDCl<sub>3</sub>) δ 163.6, 150.3, 150.2, 150.1, 140.1, 140.1, 139.9, 135.4, 135.4, 135.3, 128.7, 128.7, 128.6, 128.6, 126.1, 126.1, 126.1, 126.0, 116.9, 116.8, 116.8, 111.0, 110.8, 110.8, 110.7, 86.8, 86.6, 86.6, 86.4, 86.4, 84.7, 84.6, 84.5, 73.7, 73.5, 73.3, 72.2, 72.0, 71.2, 71.0, 63.4, 63.3, 63.2, 43.5, 43.4, 43.3, 43.2, 40.1, 40.0, 39.9, 39.8, 39.8, 28.4, 28.4, 28.3, 28.3, 24.7, 24.6, 24.6, 24.6, 24.5, 24.5, 24.5, 24.4, 24.2, 24.1, 24.0, 18.0, 18.0, 12.3, 12.3, 11.8, 11.8 (only observed peaks). <sup>31</sup>P NMR (162 MHz, CDCl<sub>3</sub>) δ 149.8, 149.6, 148.3, 147.7. HRMS–ESI (*m/z*): [M+Na]<sup>+</sup> calcd for C<sub>34</sub>H<sub>55</sub>N<sub>4</sub>NaO<sub>6</sub>PSi, 697.3521; found, 697.3526.

##### Phosphite (1a-1)

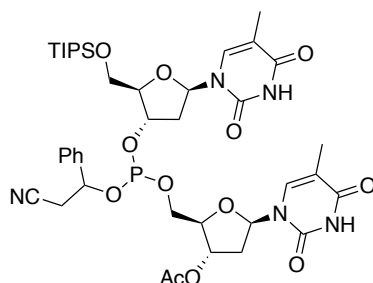

**1a-1** was purified by flash chromatography on silica gel (Biotage Selekt, 50:50:0–50:40:10, hexane/EtOAc/MeOH) (Supplementary Fig. 1; 1.82 mmol scale; 1.37 g, 1.60 mmol, 88% isolated yield) The ratio (1.3:1.2:1.1:1) of diastereomers was determined by <sup>31</sup>P-NMR analysis. White amorphous solid. <sup>1</sup>H NMR (400 MHz, CDCl<sub>3</sub>) δ 9.09–8.90 (m, 2H), 7.52–7.28 (m, 7H), 6.34–6.21 (m, 2H), 5.40 (m, 1H), 5.19 (m, 1H), 4.83 (m, 1H), 4.17–3.53 (m, 6H), 2.94–2.75 (m, 2H), 2.43–2.04

(m, 7H), 1.99–1.88 (m, 6H), 1.14–1.05 (m, 21H).  $^{13}\text{C}$  NMR (100.6 MHz,  $\text{CDCl}_3$ )  $\delta$  170.7, 170.5, 170.4, 170.4, 163.7, 163.6, 150.3, 150.2, 139.3, 139.2, 138.9, 138.7, 136.2, 135.3, 135.2, 135.1, 135.0, 134.9, 129.4, 129.3, 129.3, 129.2, 129.1, 125.9, 125.8, 116.7, 116.6, 116.6, 116.5, 111.6, 111.4, 111.4, 111.3, 111.1, 111.0, 111.0, 86.3, 85.9, 85.0, 84.7, 84.6, 84.5, 84.4, 83.4, 83.3, 83.2, 74.7, 74.4, 74.2, 74.1, 73.9, 73.8, 73.5, 73.4, 71.6, 71.6, 71.5, 71.4, 71.0, 70.9, 70.7, 70.7, 63.1, 63.0, 63.0, 62.6, 62.4, 62.3, 62.1, 40.0, 39.9, 39.7, 37.3, 37.2, 37.2, 37.1, 37.0, 28.1, 27.9, 21.0, 20.9, 18.0, 12.6, 12.6, 12.3, 11.8, 11.8 (only observed peaks).  $^{31}\text{P}$  NMR (162 MHz,  $\text{CDCl}_3$ )  $\delta$  140.0, 139.9, 139.9, 139.2. **HRMS–ESI** ( $m/z$ ):  $[\text{M}+\text{NH}_4]^+$  calcd for  $\text{C}_{40}\text{H}_{60}\text{N}_6\text{O}_{12}\text{PSi}$ , 875.3771; found, 875.3772.

### 3-**{[Bis(diisopropylamino)phosphanyl]oxy}**-3-methylbutanenitrile (**S2-2**)

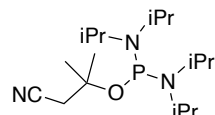

**S2-2** was purified by flash chromatography on silica gel (70:29:1, hexane/EtOAc/ $\text{NEt}_3$ ) (Supplementary Fig. 1; 3.3 mmol scale; 789 mg, 2.4 mmol, 73% isolated yield). White solid. **M.p.** 57–59 °C.  $^1\text{H}$  NMR (400 MHz,  $\text{CDCl}_3$ )  $\delta$  3.62–3.53 (m, 4H), 2.59 (s, 2H), 1.51 (s, 6H), 1.20–1.16 (m, 24H).  $^{13}\text{C}$  NMR (100.6 MHz,  $\text{CDCl}_3$ )  $\delta$  118.1, 74.2 (d,  $J_{\text{C-P}} = 17.4$  Hz), 45.0 (d,  $J_{\text{C-P}} = 13.4$  Hz), 32.9 (d,  $J_{\text{C-P}} = 4.9$  Hz), 28.1 (d,  $J_{\text{C-P}} = 10.2$  Hz), 24.4 (d,  $J_{\text{C-P}} = 5.7$  Hz), 24.0 (d,  $J_{\text{C-P}} = 8.4$  Hz).  $^{31}\text{P}$  NMR (162 MHz,  $\text{CDCl}_3$ )  $\delta$  99.6. **HRMS–ESI** ( $m/z$ ):  $[\text{M}+\text{H}]^+$  calcd for  $\text{C}_{17}\text{H}_{37}\text{N}_3\text{OP}$ , 330.2669; found, 330.2675.

### Phosphoramidite (**S3-2**)

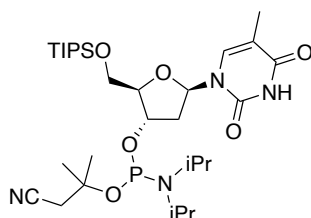

**S3-2** was purified by flash chromatography on silica gel (Biotage Selekt, 93:7–65:35, hexane/EtOAc) (Supplementary Fig. 1; 1.5 mmol scale; 621 mg, 0.99 mmol, 66% isolated yield). The ratio (1.2:1) of diastereomers was determined by  $^{31}\text{P}$ -NMR analysis. White amorphous solid.  $^1\text{H}$  NMR (400 MHz,  $\text{CDCl}_3$ )  $\delta$  8.89 (brs, 1H), 7.45 (s, 1H), 6.34 (m, 1H), 4.54 (m, 1H), 4.13 (m, 1H), 4.00–3.85 (m, 2H), 3.67–3.58 (m, 2H), 2.66–2.40 (m, 3H), 2.07 (m, 1H), 1.90 (s, 3H), 1.52–1.50 (m, 6H), 1.22–1.09 (m, 33H).  $^{13}\text{C}$  NMR (100.6 MHz,  $\text{CDCl}_3$ )  $\delta$  163.8, 163.8, 150.3, 150.2, 135.3, 135.3, 117.4, 117.4, 110.8, 110.8, 86.9, 86.8, 86.6, 86.5, 84.9, 84.7, 74.1, 74.0, 74.0, 73.9, 73.0, 72.9, 72.8, 72.7, 63.5, 63.5, 43.3, 43.2, 40.1, 40.0, 39.8, 39.8, 32.9, 32.9, 32.9, 32.8, 28.4, 28.4, 28.3, 28.3, 24.5, 24.4, 24.4, 24.3, 24.3, 24.2, 24.1, 18.0, 18.0, 12.3, 11.8, 11.8 (only observed peaks).  $^{31}\text{P}$  NMR (162 MHz,  $\text{CDCl}_3$ )  $\delta$  139.5, 139.4. **HRMS–ESI** ( $m/z$ ):  $[\text{M}+\text{H}]^+$  calcd for  $\text{C}_{30}\text{H}_{56}\text{N}_4\text{O}_6\text{PSi}$ , 627.3701; found, 627.3710.

## Phosphite (1a-2)

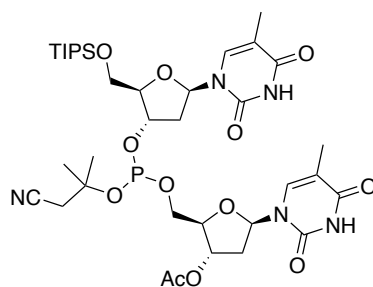

**1a-2** was purified by flash chromatography on silica gel (Biotage Selekt, 50:50:0–50:40:10, hexane/EtOAc/MeOH) (Supplementary Fig. 1; 0.6 mmol scale; 389 mg, 0.48 mmol, 80% isolated yield). The ratio (1.2:1) of diastereomers was determined by  $^{31}\text{P}$ -NMR analysis. White amorphous solid.  $^1\text{H NMR}$  (400 MHz,  $\text{CDCl}_3$ )  $\delta$  8.15–8.08 (m, 2H), 7.44–7.38 (m, 2H), 6.37–6.30 (m, 2H), 5.28 (m, 1H), 4.95 (m, 1H), 4.27–3.94 (m, 6H), 2.65–2.64 (m, 2H), 2.48–2.37 (m, 2H), 2.25–2.11 (m, 5H), 1.94–1.90 (m, 6H), 1.60–1.56 (m, 6H), 1.17–1.09 (m, 21H).  $^{13}\text{C NMR}$  (100.6 MHz,  $\text{CDCl}_3$ )  $\delta$  170.5, 170.4, 163.7, 163.5, 150.4, 150.3, 135.2, 135.1, 134.9, 116.8, 116.7, 111.5, 111.4, 111.1, 111.0, 86.4, 86.4, 86.3, 84.6, 84.6, 84.5, 83.4, 83.3, 83.3, 75.7, 75.6, 75.5, 75.4, 74.2, 73.8, 73.5, 73.4, 73.1, 73.0, 63.2, 63.2, 61.4, 61.1, 40.0, 39.8, 37.3, 37.3, 32.9, 32.9, 30.9, 28.9, 28.8, 28.8, 28.7, 28.6, 20.9, 20.9, 18.0, 18.0, 12.6, 12.6, 12.3, 12.3, 11.8 (only observed peaks).  $^{31}\text{P NMR}$  (162 MHz,  $\text{CDCl}_3$ )  $\delta$  135.0, 134.6. **HRMS-ESI** ( $m/z$ ):  $[\text{M}+\text{H}]^+$  calcd for  $\text{C}_{36}\text{H}_{57}\text{N}_5\text{O}_{12}\text{PSi}$ , 810.3505; found, 810.3497.

## 3-{{Bis(diisopropylamino)phosphaneyl}oxy}butanenitrile (S2-3)

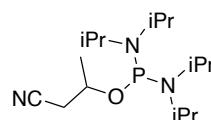

**S2-3** was purified by flash chromatography on silica gel (70:29:1, hexane/EtOAc/ $\text{NEt}_3$ ) (Supplementary Fig. 1; 4 mmol scale; 505 mg, 1.6 mmol, 40% isolated yield). White solid. **M.p.** 41–45 °C.  $^1\text{H NMR}$  (400 MHz,  $\text{CDCl}_3$ )  $\delta$  4.00 (m, 1H), 3.58–3.48 (m, 4H), 2.64–2.54 (m, 2H), 1.38 (d,  $J = 6.4$  Hz, 3H), 1.19–1.16 (m, 24H).  $^{13}\text{C NMR}$  (100.6 MHz,  $\text{CDCl}_3$ )  $\delta$  117.6, 65.4, 65.2, 44.8, 44.6, 44.5, 26.6, 26.5, 24.4, 24.3, 24.2, 24.1, 24.1, 21.6, 21.6 (only observed peaks).  $^{31}\text{P NMR}$  (162 MHz,  $\text{CDCl}_3$ )  $\delta$  113.2. **HRMS-ESI** ( $m/z$ ):  $[\text{M}+\text{H}]^+$  calcd for  $\text{C}_{16}\text{H}_{35}\text{N}_3\text{OP}$ , 316.2512; found, 316.2513.

## Phosphoramidite (S3-3)

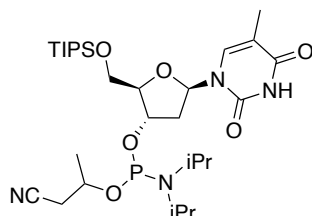

**S3-3** was purified by flash chromatography on silica gel (Biotage Selekt, 93:7–55:45, hexane/EtOAc) (Supplementary Fig. 1; 1 mmol scale; 251 mg, 0.41 mmol, 41% isolated yield). The ratio (1.3:1.2:1.1:1) of diastereomers was determined by  $^{31}\text{P}$ -NMR analysis. White amorphous solid.  $^1\text{H NMR}$  (400 MHz,  $\text{CDCl}_3$ )  $\delta$  8.15 (brs, 1H), 7.45 (m, 1H), 6.33 (m, 1H), 4.58 (m, 1H), 4.18–4.07 (m, 2H), 4.00–3.86 (m, 2H), 3.66–3.57 (m, 2H), 2.66–2.38 (m, 3H), 2.10 (m, 1H), 1.91 (s, 3H), 1.41–

1.36 (m, 3H), 1.22–1.09 (m, 33H).  $^{13}\text{C}$  NMR (100.6 MHz,  $\text{CDCl}_3$ )  $\delta$  163.6, 150.2, 150.2, 150.1, 135.4, 135.4, 135.3, 135.3, 117.1, 117.1, 117.1, 117.0, 110.9, 110.8, 110.8, 87.0, 87.0, 86.8, 86.8, 86.5, 86.5, 86.4, 84.8, 84.8, 84.6, 84.5, 73.5, 73.4, 73.3, 73.3, 73.2, 73.2, 66.2, 66.0, 65.9, 65.7, 65.6, 65.6, 65.4, 65.4, 63.5, 63.4, 63.3, 43.3, 43.3, 43.2, 43.2, 43.2, 43.1, 40.1, 40.1, 40.1, 40.0, 40.0, 39.9, 39.9, 26.9, 26.8, 26.8, 26.8, 26.7, 26.7, 24.6, 24.5, 24.5, 24.5, 24.4, 24.4, 24.3, 22.0, 21.9, 21.9, 21.9, 18.0, 18.0, 18.0, 12.3, 12.3, 11.8 (only observed peaks).  $^{31}\text{P}$  NMR (162 MHz,  $\text{CDCl}_3$ )  $\delta$  147.4, 147.2, 147.1, 146.8. HRMS–ESI ( $m/z$ ):  $[\text{M}+\text{Na}]^+$  calcd for  $\text{C}_{29}\text{H}_{53}\text{N}_4\text{NaO}_6\text{PSi}$ , 635.3364; found, 635.3361.

### Phosphite (1a-3)

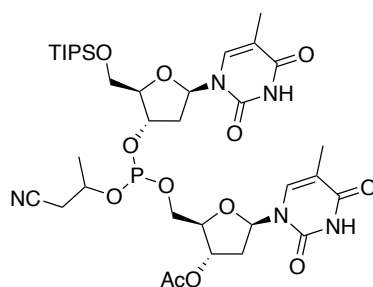

**1a-3** was purified by flash chromatography on silica gel (Biotage Selekt, 50:50:0–50:40:10, hexane/EtOAc/MeOH) (Supplementary Fig. 1; 0.4 mmol scale; 305 mg, 0.38 mmol, 96% isolated yield). The ratio (1.1:1:1:1) of diastereomers was determined by  $^{31}\text{P}$ -NMR analysis. White amorphous solid.  $^1\text{H}$  NMR (400 MHz,  $\text{CDCl}_3$ )  $\delta$  8.66–8.53 (m, 2H), 7.43–7.39 (m, 2H), 6.36–6.29 (m, 2H), 5.28 (m, 1H), 4.96 (m, 1H), 4.54 (m, 1H), 4.40–4.08 (m, 4H), 3.98–3.93 (m, 2H), 2.70–2.55 (m, 2H), 2.51–2.38 (m, 2H), 2.28–2.11 (m, 5H), 1.96–1.91 (m, 6H), 1.53–1.40 (m, 3H), 1.21–1.09 (m, 21H).  $^{13}\text{C}$  NMR (100.6 MHz,  $\text{CDCl}_3$ )  $\delta$  170.5, 170.5, 163.7, 163.6, 150.4, 150.3, 135.2, 135.2, 135.1, 134.9, 134.9, 134.9, 116.8, 116.7, 116.6, 116.6, 111.6, 111.6, 111.5, 111.3, 111.1, 86.4, 86.4, 86.4, 86.3, 86.3, 84.7, 84.6, 84.6, 84.5, 83.4, 83.3, 83.3, 83.2, 74.2, 74.1, 74.1, 74.0, 73.9, 73.8, 73.7, 73.5, 73.4, 73.3, 66.5, 66.4, 66.3, 66.2, 66.1, 66.1, 65.9, 63.4, 63.2, 62.1, 62.1, 62.0, 61.9, 61.8, 61.8, 61.7, 40.0, 40.0, 39.9, 39.9, 39.8, 39.8, 37.3, 37.2, 37.2, 27.0, 26.9, 26.9, 26.9, 26.8, 22.4, 22.4, 22.3, 22.3, 22.2, 20.9, 20.9, 20.8, 18.0, 18.0, 12.7, 12.6, 12.3, 11.8 (only observed peaks).  $^{31}\text{P}$  NMR (162 MHz,  $\text{CDCl}_3$ )  $\delta$  139.7, 139.2, 139.1, 139.0. HRMS–ESI ( $m/z$ ):  $[\text{M}+\text{Na}]^+$  calcd for  $\text{C}_{35}\text{H}_{54}\text{N}_5\text{NaO}_{12}\text{PSi}$ , 818.3168; found, 818.3167.

### Phosphite (1a-4)

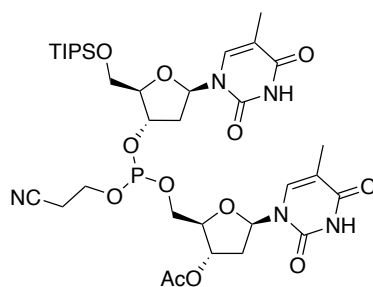

**1a-4** was purified by flash chromatography on silica gel (Biotage Selekt, 50:50:0–50:40:10, hexane/EtOAc/MeOH) (Supplementary Fig. 1; 0.6 mmol scale; 403 mg, 0.52 mmol, 86% isolated yield). The ratio (1.1:1) of diastereomers was determined by  $^{31}\text{P}$ -NMR analysis. White amorphous solid.  $^1\text{H}$  NMR (400 MHz,  $\text{CDCl}_3$ )  $\delta$  8.64 (brs, 2H), 7.42–7.38 (m, 2H), 6.36–6.29 (m, 2H), 5.29 (m,

1H), 4.95 (m, 1H), 4.20–4.04 (m, 6H), 3.98–3.91 (m, 2H), 2.71–2.68 (m, 2H), 2.49–2.39 (m, 2H), 2.27–2.11 (m, 5H), 1.94–1.91 (m, 6H), 1.19–1.08 (m, 21H). <sup>13</sup>C NMR (100.6 MHz, CDCl<sub>3</sub>) δ 170.7, 170.6, 170.5, 163.8, 163.7, 150.4, 150.3, 136.3, 135.3, 135.2, 135.0, 135.0, 117.2, 117.1, 111.6, 111.5, 111.4, 111.2, 111.2, 86.4, 86.4, 86.3, 86.0, 85.0, 84.8, 84.7, 84.6, 84.5, 83.4, 83.4, 83.3, 83.3, 74.7, 74.2, 74.1, 74.0, 73.8, 73.7, 63.1, 62.6, 62.3, 62.2, 62.2, 58.0, 57.8, 57.5, 57.4, 40.0, 39.9, 37.3, 37.2, 37.2, 21.0, 20.9, 20.4, 20.3, 20.3, 18.0, 18.0, 12.6, 12.6, 12.6, 12.3, 11.8 (only observed peaks). <sup>31</sup>P NMR (162 MHz, CDCl<sub>3</sub>) δ 139.7, 139.3. HRMS–ESI (*m/z*): [M+NH<sub>4</sub>]<sup>+</sup> calcd for C<sub>34</sub>H<sub>56</sub>N<sub>6</sub>O<sub>12</sub>PSi, 799.3458; found, 799.3459.

### ***N*-Benzoyl-5'-*O*-TIPS-5-methyl-2'-deoxycytidine**

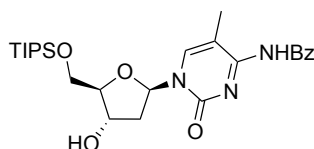

***N*-Benzoyl-5'-*O*-TIPS-5-methyl-2'-deoxycytidine** was prepared according to the reported procedure<sup>9</sup> and purified by flash chromatography on silica gel (Biotage Selekt, 50:50:0–50:45:5, hexane/EtOAc/MeOH) (3 mmol scale; 948 mg, 1.89 mmol, 63% isolated yield). White solid. **M.p.** 113–117 °C. <sup>1</sup>H NMR (400 MHz, CDCl<sub>3</sub>) δ 13.3 (brs, 1H), 8.31 (d, *J* = 7.6 Hz, 2H), 7.65 (s, 1H), 7.52 (m, 1H), 7.46–7.42 (m, 2H), 6.39 (t, *J* = 6.8 Hz, 1H), 4.58 (m, 1H), 4.06–3.95 (m, 3H), 2.45 (m, 1H), 2.20–2.10 (m, 5H), 1.20–1.11 (m, 21H). <sup>13</sup>C NMR (100.6 MHz, CDCl<sub>3</sub>) δ 179.6, 159.7, 147.9, 137.2, 136.5, 132.4, 129.9, 128.1, 111.7, 87.1, 85.4, 72.1, 63.6, 41.4, 18.0, 13.5, 11.8. HRMS–ESI (*m/z*): [M+H]<sup>+</sup> calcd for C<sub>26</sub>H<sub>40</sub>N<sub>3</sub>O<sub>5</sub>Si, 502.2732; found, 502.2734.

### ***N*-Benzoyl-5'-*O*-TIPS-5-methyl-2'-deoxycytidine Phosphoramidite**

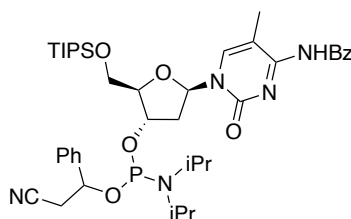

***N*-Benzoyl-5'-*O*-TIPS-5-methyl-2'-deoxycytidine Phosphoramidite** was purified by flash chromatography on silica gel (Biotage Selekt, 100:0–80:20, hexane/EtOAc) (1.5 mmol scale; 840 mg, 1.08 mmol, 72% isolated yield). The ratio (2.2:1.8:1:1) of diastereomers was determined by <sup>31</sup>P-NMR analysis. White amorphous solid. <sup>1</sup>H NMR (400 MHz, CDCl<sub>3</sub>) δ 13.29 (brs, 1H), 8.33–8.30 (m, 2H), 7.69–7.31 (m, 9H), 6.39 (m, 0.34H), 6.15 (m, 0.66H), 5.02 (m, 1H), 4.66 (m, 0.34H), 4.40 (m, 0.66H), 4.20–3.51 (m, 5H), 2.84–2.72 (m, 2H), 2.54 (m, 0.34H), 2.38–2.07 (m, 4H), 1.90 (m, 0.66H), 1.28–0.96 (m, 33H). <sup>13</sup>C NMR (100.6 MHz, CDCl<sub>3</sub>) δ 179.6, 159.8, 159.7, 147.7, 147.7, 140.1, 140.1, 140.1, 140.0, 139.8, 137.2, 136.7, 136.6, 136.5, 132.3, 129.9, 128.7, 128.7, 128.7, 128.1, 126.1, 126.1, 126.1, 126.0, 116.9, 116.8, 116.8, 116.8, 111.6, 111.5, 87.1, 86.9, 86.9, 86.7, 86.6, 85.5, 85.4, 85.2, 73.8, 73.7, 73.6, 73.5, 73.3, 72.3, 72.2, 72.0, 71.9, 71.2, 71.2, 71.0, 71.0, 63.4, 63.3, 63.3, 63.1, 43.6, 43.6, 43.5, 43.4, 43.4, 43.2, 40.3, 40.3, 40.2, 40.1, 28.5, 28.4, 28.3, 28.3, 24.7, 24.6, 24.6, 24.5, 24.5, 24.1, 24.1, 24.0, 18.0, 18.0, 13.4, 11.9, 11.8 (only observed peaks). <sup>31</sup>P NMR (162 MHz, CDCl<sub>3</sub>)

$\delta$  149.8, 149.8, 148.3, 147.9. **HRMS-ESI** ( $m/z$ ):  $[M+H]^+$  calcd for  $C_{41}H_{61}N_5O_6PSi$ , 778.4123; found, 778.4122.

### Phosphite (1b)

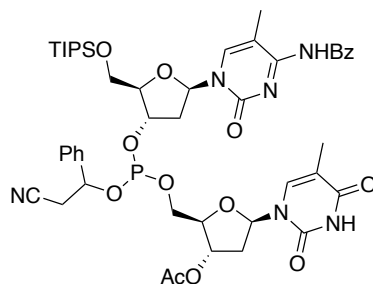

**1b** was purified by flash chromatography on silica gel (Biotage Selekt, 50:50:0–50:40:10, hexane/EtOAc/MeOH) (0.48 mmol scale; 300 mg, 0.31 mmol, 65% isolated yield). The ratio (1.1:1.1:1:1) of diastereomers was determined by  $^{31}P$ -NMR analysis. White amorphous solid.  $^1H$  NMR (400 MHz,  $CDCl_3$ )  $\delta$  13.30 (brs, 1H), 8.33–8.30 (m, 3H), 7.61–7.28 (m, 10H), 6.35–6.22 (m, 2H), 5.43 (m, 1H), 5.21 (m, 1H), 4.86 (m, 1H), 4.18–3.56 (m, 6H), 2.94–2.75 (m, 2H), 2.48–1.78 (m, 13H), 1.25–1.06 (m, 21H).  $^{13}C$  NMR (100.6 MHz,  $CDCl_3$ )  $\delta$  170.4, 170.4, 170.4, 163.2, 163.2, 159.6, 150.1, 150.1, 147.8, 147.8, 139.3, 139.2, 138.8, 138.7, 137.1, 136.2, 136.1, 136.1, 135.3, 135.1, 135.0, 135.0, 132.4, 129.9, 129.4, 129.4, 129.3, 129.2, 129.1, 128.1, 125.9, 125.8, 125.8, 116.7, 116.6, 116.6, 116.5, 111.9, 111.8, 111.8, 111.5, 111.4, 111.4, 111.3, 86.6, 86.6, 86.2, 85.2, 85.1, 85.0, 84.7, 84.6, 84.5, 84.5, 83.3, 83.3, 83.2, 83.2, 74.5, 74.2, 74.2, 74.1, 74.0, 73.3, 71.8, 71.6, 71.4, 71.0, 70.9, 70.7, 63.1, 63.0, 62.5, 62.5, 62.1, 40.3, 40.1, 37.3, 37.2, 37.1, 37.0, 28.1, 27.9, 20.9, 20.9, 18.0, 13.4, 12.6, 12.6, 11.8, 11.8 (only observed peaks).  $^{31}P$  NMR (162 MHz,  $CDCl_3$ )  $\delta$  139.9, 139.8, 139.7, 139.2. **HRMS-ESI** ( $m/z$ ):  $[M+H]^+$  calcd for  $C_{47}H_{62}N_6O_{12}PSi$ , 961.3927; found, 961.3930.

### Phosphite (1c)

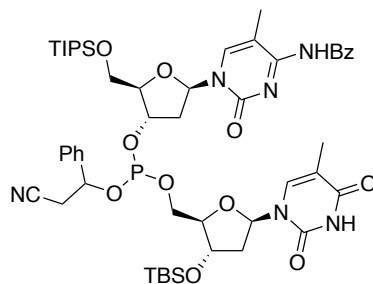

**1c** was purified by flash chromatography on silica gel (Biotage Selekt, 98:2–80:20, DCM/EtOAc) (0.63 mmol scale; 267 mg, 0.26 mmol, 41% isolated yield). The ratio (1.3:1.2:1.1:1) of diastereomers was determined by  $^{31}P$ -NMR analysis. White amorphous solid.  $^1H$  NMR (400 MHz,  $CDCl_3$ )  $\delta$  13.29 (brs, 1H), 8.32–8.30 (m, 2H), 8.07 (m, 1H), 7.59–7.51 (m, 2H), 7.46–7.20 (m, 8H), 6.31–6.16 (m, 2H), 5.39 (m, 1H), 4.85 (m, 1H), 4.38–3.54 (m, 7H), 2.92–2.74 (m, 2H), 2.46–1.74 (m, 10H), 1.18–1.07 (m, 21H), 0.90–0.88 (m, 9H), 0.09–0.08 (m, 6H).  $^{13}C$  NMR (100.6 MHz,  $CDCl_3$ )  $\delta$  179.5, 163.6, 159.6, 150.2, 150.1, 147.8, 139.4, 139.2, 138.9, 138.7, 137.1, 136.1, 135.8, 135.6, 132.4, 129.8, 129.3, 129.3, 129.2, 129.0, 128.1, 125.8, 125.7, 116.6, 116.6, 116.5, 116.4, 111.8, 111.8, 111.7, 111.0, 110.9, 110.9, 110.9, 86.7, 86.6, 86.6, 86.6, 86.3, 86.3, 85.7, 85.7, 85.6, 85.6, 85.5, 85.4, 85.4, 85.2, 85.1, 85.0, 85.0, 85.0, 84.9, 74.3, 74.1, 74.1, 73.9, 73.6, 73.5, 73.1, 73.0, 71.9, 71.6, 71.5, 71.4, 71.4, 71.4,

71.3, 70.7, 70.6, 70.3, 70.3, 63.0, 63.0, 62.9, 62.4, 62.3, 62.1, 62.1, 61.8, 61.7, 61.6, 61.5, 40.4, 40.3, 40.2, 40.0, 28.2, 27.9, 27.8, 25.6, 18.0, 17.8, 13.4, 13.3, 12.6, 12.5, 11.8, 11.7, -4.7, -4.7, -4.7, -4.8 (only observed peaks).  $^{31}\text{P}$  NMR (162 MHz,  $\text{CDCl}_3$ )  $\delta$  139.7, 139.6, 139.4, 139.1. HRMS-ESI ( $m/z$ ):  $[\text{M}+\text{H}]^+$  calcd for  $\text{C}_{51}\text{H}_{74}\text{N}_6\text{O}_{11}\text{PSi}_2$ , 1033.4686; found, 1033.4683.

### Phosphite (1d)

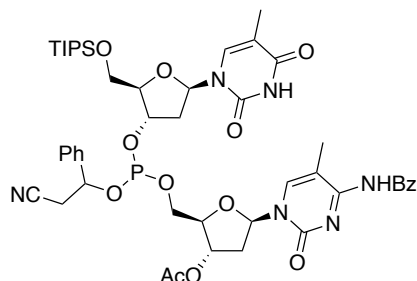

**1d** was purified by flash chromatography on silica gel (Biotage Selekt, 50:50:0–50:40:10, hexane/EtOAc/MeOH) (0.8 mmol scale; 431 mg, 0.45 mmol, 56% isolated yield). The ratio (1.1:1.1:1:1) of diastereomers was determined by  $^{31}\text{P}$ -NMR analysis. White amorphous solid.  $^1\text{H}$  NMR (400 MHz,  $\text{CDCl}_3$ )  $\delta$  13.25 (brs, 1H), 8.62 (m, 1H), 8.33–8.31 (m, 2H), 7.59–7.34 (m, 10H), 6.36–6.23 (m, 2H), 5.43 (m, 1H), 5.18 (m, 1H), 4.86 (m, 1H), 4.19–3.57 (m, 6H), 2.95–2.75 (m, 2H), 2.45–1.74 (m, 13H), 1.16–1.04 (m, 21H).  $^{13}\text{C}$  NMR (100.6 MHz,  $\text{CDCl}_3$ )  $\delta$  179.7, 179.7, 170.4, 170.4, 170.3, 163.4, 159.4, 159.4, 150.2, 150.1, 147.9, 139.2, 138.8, 138.8, 137.0, 136.3, 136.3, 136.2, 136.2, 136.1, 136.0, 135.0, 135.0, 134.9, 132.5, 129.9, 129.4, 129.4, 129.3, 129.2, 129.1, 129.1, 128.1, 126.0, 125.8, 125.8, 116.7, 116.6, 116.5, 112.4, 112.3, 112.2, 112.1, 111.1, 111.0, 111.0, 111.0, 86.3, 86.3, 86.0, 85.9, 85.2, 85.1, 85.0, 84.9, 84.5, 84.4, 84.4, 83.6, 83.5, 83.5, 83.4, 83.4, 74.4, 74.3, 74.2, 74.1, 74.1, 74.0, 73.8, 73.5, 73.4, 71.6, 71.6, 71.5, 71.0, 70.9, 70.9, 70.8, 63.1, 63.1, 63.0, 62.6, 62.5, 62.5, 62.4, 62.3, 62.2, 62.1, 62.0, 40.0, 39.8, 39.7, 39.7, 37.6, 37.5, 37.4, 37.3, 28.1, 27.9, 27.9, 20.9, 20.9, 18.0, 13.7, 12.3, 11.8, 11.8 (only observed peaks).  $^{31}\text{P}$  NMR (162 MHz,  $\text{CDCl}_3$ )  $\delta$  140.3, 140.0, 139.7, 139.2. HRMS-ESI ( $m/z$ ):  $[\text{M}+\text{H}]^+$  calcd for  $\text{C}_{47}\text{H}_{62}\text{N}_6\text{O}_{12}\text{PSi}$ , 961.3927; found, 961.3925.

### *N*<sup>6</sup>-Benzoyl-5'-*O*-TIPS-2'-deoxyadenosine Phosphoramidite

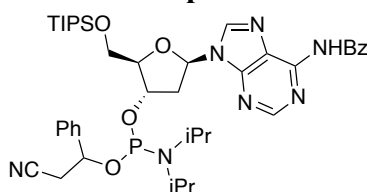

***N*<sup>6</sup>-Benzoyl-5'-*O*-TIPS-2'-deoxyadenosine Phosphoramidite** was purified by flash chromatography on silica gel (Biotage Selekt, 88:12–45:55, hexane/EtOAc) (3.33 mmol scale; 1.32 g, 1.67 mmol, 50% isolated yield). The ratio (2.3:2.3:1:1) of diastereomers was determined by  $^{31}\text{P}$ -NMR analysis. White amorphous solid.  $^1\text{H}$  NMR (400 MHz,  $\text{CDCl}_3$ )  $\delta$  9.00 (m, 1H), 8.82 (m, 1H), 8.34 (s, 0.15H), 8.32 (s, 0.15H), 8.26 (s, 0.35H), 8.17 (s, 0.35H), 8.04–8.01 (m, 2H), 7.63–7.51 (m, 3H), 7.42–7.24 (m, 5H), 6.58 (m, 0.3H), 6.31 (m, 0.35H), 6.18 (m, 0.35H), 5.04 (m, 1H), 4.84 (m, 0.3H), 4.59 (m, 0.7H), 4.27 (m, 0.3H), 4.07–3.85 (m, 2H), 3.80–3.55 (m, 2.7H), 2.86–2.70 (m, 2.65H), 2.54 (m, 1H), 2.28 (m, 0.35H), 1.30–0.97 (m, 33H).  $^{13}\text{C}$  NMR (100.6 MHz,  $\text{CDCl}_3$ )  $\delta$  164.6, 152.6, 152.5, 152.5, 151.5, 151.5, 151.4, 151.4, 149.4, 149.4, 149.3, 141.5, 141.4, 141.3, 140.2, 140.2, 140.2,

139.9, 139.9, 139.9, 133.8, 133.7, 132.7, 128.8, 128.7, 128.6, 127.8, 126.1, 126.1, 126.0, 123.3, 123.2, 123.2, 123.2, 116.9, 116.8, 116.8, 116.7, 87.4, 87.4, 87.1, 87.1, 87.0, 86.9, 84.6, 84.5, 84.5, 73.9, 73.7, 73.6, 73.5, 73.4, 73.3, 73.2, 73.1, 72.3, 72.1, 72.1, 71.9, 71.4, 71.3, 71.2, 71.1, 63.3, 63.3, 63.1, 53.4, 43.6, 43.5, 43.4, 43.3, 43.2, 43.2, 40.1, 40.0, 40.0, 39.9, 39.5, 39.5, 28.4, 28.4, 28.3, 24.7, 24.6, 24.6, 24.5, 24.5, 24.5, 24.2, 24.1, 24.1, 24.0, 17.9, 17.9, 11.8, 11.8 (only observed peaks). <sup>31</sup>P NMR (162 MHz, CDCl<sub>3</sub>) δ 150.3, 149.2, 148.4, 147.6. HRMS–ESI (*m/z*): [M+H]<sup>+</sup> calcd for C<sub>41</sub>H<sub>59</sub>N<sub>7</sub>O<sub>5</sub>PSi, 788.4079; found, 788.4083.

### Phosphite (1e)

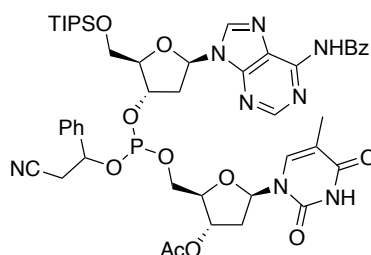

**1e** was purified by flash chromatography on silica gel (Biotage Selekt, 50:50:0–50:40:10, hexane/EtOAc/MeOH) (1.67 mmol scale; 1.06 g, 1.09 mmol, 65% isolated yield). The ratio (1.4:1.4:1.2:1) of diastereomers was determined by <sup>31</sup>P-NMR analysis. White amorphous solid. <sup>1</sup>H NMR (400 MHz, CDCl<sub>3</sub>) δ 9.31–8.79 (m, 3H), 8.26 (m, 1H), 8.06–8.04 (m, 2H), 7.63–7.50 (m, 3H), 7.43–7.31 (m, 6H), 6.47–6.22 (m, 2H), 5.52–4.93 (m, 3H), 4.28–4.08 (m, 3H), 4.04–3.61 (m, 3H), 2.96–2.60 (m, 4H), 2.49–2.05 (m, 5H), 1.95–1.87 (m, 3H), 1.14–1.02 (m, 21H). <sup>13</sup>C NMR (100.6 MHz, CDCl<sub>3</sub>) δ 170.6, 170.5, 170.4, 170.4, 164.8, 163.4, 152.5, 151.6, 150.2, 149.6, 141.6, 141.5, 141.2, 141.0, 139.2, 139.2, 138.9, 138.8, 136.2, 135.2, 135.1, 135.0, 133.6, 132.7, 129.4, 129.4, 129.3, 129.1, 129.1, 128.9, 128.8, 128.0, 125.8, 125.7, 125.5, 123.4, 123.4, 116.7, 116.6, 116.6, 116.5, 111.5, 111.4, 111.4, 86.9, 86.9, 86.8, 86.8, 86.8, 85.9, 85.0, 84.8, 84.7, 84.6, 84.6, 84.6, 84.3, 83.5, 83.5, 83.4, 83.4, 83.3, 83.3, 74.7, 74.4, 74.3, 74.3, 74.2, 74.2, 74.1, 73.9, 73.7, 71.8, 71.6, 71.5, 71.3, 71.2, 70.2, 63.0, 62.9, 62.9, 62.6, 62.5, 62.4, 62.3, 62.3, 62.2, 62.2, 40.0, 40.0, 39.4, 39.1, 39.1, 37.3, 37.2, 37.2, 37.0, 28.2, 28.1, 28.0, 28.0, 28.0, 21.0, 20.9, 20.9, 18.0, 18.0, 12.6, 12.6, 12.5, 11.8, 11.8 (only observed peaks). <sup>31</sup>P NMR (162 MHz, CDCl<sub>3</sub>) δ 140.8, 140.0, 139.8, 139.0. HRMS–ESI (*m/z*): [M+H]<sup>+</sup> calcd for C<sub>47</sub>H<sub>60</sub>N<sub>8</sub>O<sub>11</sub>PSi, 971.3883; found, 971.3892.

### *N*<sup>2</sup>-Isobutyryl-*O*<sup>6</sup>-(diphenylcarbamoyl)-5'-*O*-TIPS-2'-deoxyguanosine

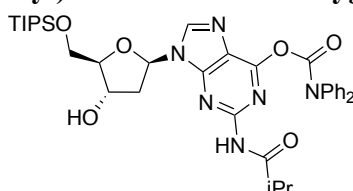

*N*<sup>2</sup>-Isobutyryl-*O*<sup>6</sup>-(diphenylcarbamoyl)-5'-*O*-TIPS-2'-deoxyguanosine was prepared according to the reported procedure<sup>10</sup> and purified by flash chromatography on silica gel (Biotage Selekt, 90:10–67:33, DCM/EtOAc) (2.84 mmol scale; 1.39 g, 2.02 mmol, 71% isolated yield). White solid. **M.p.** 123–127 °C. <sup>1</sup>H NMR (400 MHz, CDCl<sub>3</sub>) δ 8.27 (m, 1H), 8.03 (m, 1H), 7.44–7.34 (m, 8H), 7.26–7.23 (m, 2H), 6.63 (m, 1H), 4.80 (m, 1H), 4.14 (m, 1H), 3.99–3.91 (m, 2H), 2.85 (brs, 1H),



2.67–2.59 (m, 2H), 1.64 (m, 1H), 1.26 (d,  $J = 6.8$  Hz, 6H), 1.18–1.05 (m, 21H).  $^{13}\text{C}$  NMR (100.6 MHz,  $\text{CDCl}_3$ )  $\delta$  175.3, 155.8, 154.7, 151.5, 150.4, 142.8, 141.7, 129.1, 127.1, 121.3, 88.2, 84.6, 72.4, 64.2, 41.7, 36.3, 19.3, 18.0, 11.9. **HRMS–ESI** ( $m/z$ ):  $[\text{M}+\text{H}]^+$  calcd for  $\text{C}_{36}\text{H}_{49}\text{N}_6\text{O}_6\text{Si}$ , 689.3477; found, 689.3475.

### ***N*<sup>2</sup>-Isobutyryl-*O*<sup>6</sup>-(diphenylcarbamoyl)-5'-*O*-TIPS-2'-deoxyguanosine Phosphoramidite**

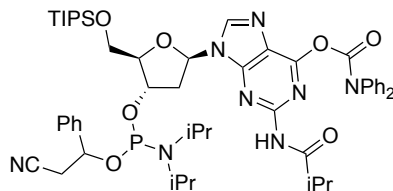

***N*<sup>2</sup>-Isobutyryl-*O*<sup>6</sup>-(diphenylcarbamoyl)-5'-*O*-TIPS-2'-deoxyguanosine Phosphoramidite** was purified by flash chromatography on silica gel (Biotage Selekt, 93:7–66:34, hexane/EtOAc) (1 mmol scale; 676 mg, 0.7 mmol, 70% isolated yield). The ratio (2.1:1.9:1:1) of diastereomers was determined by  $^{31}\text{P}$ -NMR analysis. White amorphous solid.  $^1\text{H}$  NMR (400 MHz,  $\text{CDCl}_3$ )  $\delta$  8.18 (m, 1H), 7.94 (m, 1H), 7.43–7.22 (m, 15H), 6.47 (m, 0.34H), 6.16 (m, 0.66H), 5.03 (m, 1H), 4.80 (m, 0.34H), 4.54 (m, 0.66H), 4.23 (m, 0.34H), 4.02–3.57 (m, 4.66H), 3.07 (m, 1H), 2.88–2.29 (m, 4H), 1.29–0.97 (m, 39H).  $^{13}\text{C}$  NMR (100.6 MHz,  $\text{CDCl}_3$ )  $\delta$  175.9, 175.5, 156.0, 155.9, 155.9, 154.5, 154.4, 154.4, 151.9, 151.9, 151.8, 150.4, 150.3, 142.3, 142.2, 142.2, 141.7, 140.1, 139.9, 129.0, 128.6, 128.6, 128.5, 126.8, 126.1, 126.1, 126.0, 126.0, 121.3, 121.2, 121.1, 116.9, 116.8, 116.7, 87.4, 87.4, 87.2, 87.1, 87.0, 87.0, 87.0, 86.9, 84.5, 84.3, 73.9, 73.7, 73.5, 73.4, 73.3, 73.2, 73.1, 72.9, 72.0, 72.0, 71.8, 71.8, 71.3, 71.2, 71.1, 71.0, 63.4, 63.0, 43.6, 43.5, 43.4, 43.3, 43.3, 43.2, 43.1, 40.2, 40.0, 39.6, 39.6, 35.6, 35.3, 28.4, 28.4, 28.3, 28.2, 24.6, 24.6, 24.5, 24.4, 24.1, 24.0, 24.0, 19.2, 19.1, 17.9, 11.8, 11.8 (only observed peaks).  $^{31}\text{P}$  NMR (162 MHz,  $\text{CDCl}_3$ )  $\delta$  150.1, 149.2, 148.6, 147.7. **HRMS–ESI** ( $m/z$ ):  $[\text{M}+\text{H}]^+$  calcd for  $\text{C}_{51}\text{H}_{70}\text{N}_8\text{O}_7\text{PSi}$ , 965.4869; found, 965.4866.

### **Phosphite (1f)**

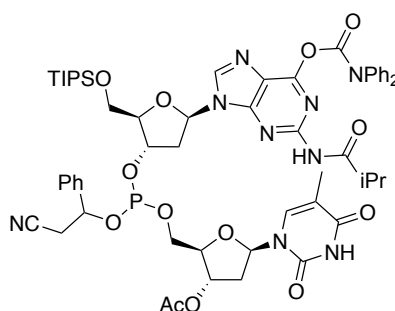

**1f** was purified by flash chromatography on silica gel (Biotage Selekt, 50:50:0–50:40:10, hexane/EtOAc/MeOH) (0.6 mmol scale; 641 mg, 0.56 mmol, 93% isolated yield). The ratio (1.2:1.1:1:1) of diastereomers was determined by  $^{31}\text{P}$ -NMR analysis. White amorphous solid.  $^1\text{H}$  NMR (400 MHz,  $\text{CDCl}_3$ )  $\delta$  8.83 (m, 1H), 8.29 (m, 1H), 8.16 (m, 1H), 7.50–7.24 (m, 16H), 6.35–6.24 (m, 2H), 5.50–4.93 (m, 3H), 4.25–3.59 (m, 6H), 2.94–2.57 (m, 4H), 2.50–2.29 (m, 2H), 2.24–2.04 (m, 4H), 1.97–1.88 (m, 3H), 1.26–1.24 (m, 6H), 1.09–1.00 (m, 21H).  $^{13}\text{C}$  NMR (100.6 MHz,  $\text{CDCl}_3$ )  $\delta$  175.4, 175.3, 170.6, 170.5, 170.4, 170.4, 163.5, 156.0, 154.5, 152.0, 151.9, 150.4, 150.2, 142.5, 142.3, 142.2, 141.7, 139.2, 139.0, 138.8, 136.2, 135.4, 135.3, 135.3, 129.3, 129.3, 129.2, 129.1, 129.0,

127.1, 125.9, 125.8, 121.4, 121.4, 121.3, 116.6, 116.6, 116.5, 111.4, 111.3, 111.3, 111.3, 86.9, 86.8, 86.6, 85.8, 85.0, 84.9, 84.9, 84.7, 84.6, 84.5, 84.4, 84.3, 84.2, 83.6, 83.5, 83.3, 83.3, 74.7, 74.4, 74.3, 74.3, 74.2, 74.1, 73.6, 71.7, 71.5, 71.3, 71.0, 70.8, 70.7, 63.2, 63.0, 62.5, 62.5, 62.3, 62.1, 40.0, 39.9, 39.5, 39.4, 37.3, 37.2, 37.1, 37.0, 36.0, 28.1, 27.9, 21.0, 20.9, 19.3, 17.9, 12.6, 12.5, 11.8, 11.8 (only observed peaks).  $^{31}\text{P}$  NMR (162 MHz,  $\text{CDCl}_3$ )  $\delta$  141.0, 140.5, 139.8, 139.1. HRMS–ESI ( $m/z$ ):  $[\text{M}+\text{H}]^+$  calcd for  $\text{C}_{57}\text{H}_{71}\text{N}_9\text{O}_{13}\text{PSi}$ , 1148.4673; found, 1148.4672.

## 5. General Procedure for Synthesis of *tert*-Alkylphosphonate Oligonucleotides

The reaction in Table 2, entry 2 is representative. In a glovebox, to an oven-dried vial with a stirring bar was added PTH2 (13.2 mg, 0.05 mmol), phosphite 1a-1 (42.9 mg, 0.05 mmol), redox-active ester 2a (46.4 mg, 0.15 mmol) and  $\text{LiBF}_4$  (4.7 mg, 0.05 mmol). Then, MeCN (300  $\mu\text{L}$ ) and DCM (200  $\mu\text{L}$ ) were added to the reaction mixture. After sealing the vial with parafilm, the reaction mixture was stirred and irradiated with a 34W blue LED with UC reactor to keep the temperature at 10  $^\circ\text{C}$  (Supplementary Fig. 2). After 18 h, the solvents were removed under reduced pressure. The crude material was then purified by flash column chromatography on silica gel (80:20:0–50:45:5, hexane/EtOAc/MeOH) to give the alkylated product 3aa (29.6 mg, 0.035 mmol, 70% isolated yield) as a white amorphous solid.

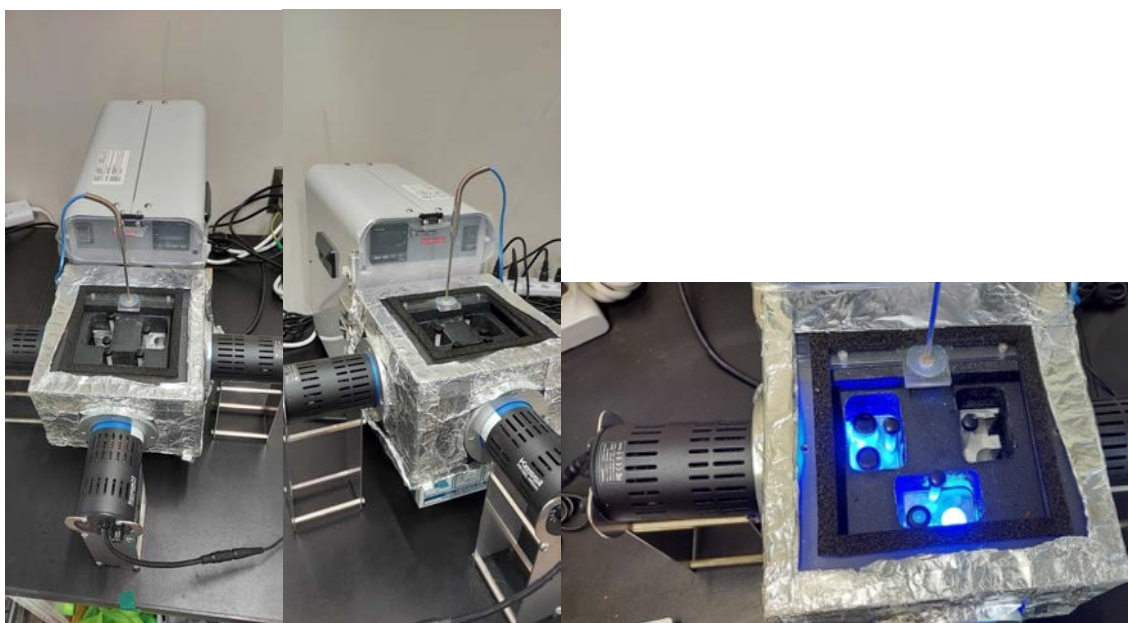

Supplementary Fig. 2. Light set up

## 6. Characterization Data for Alkylated Products

### *tert*-Alkylphosphonate 3aa

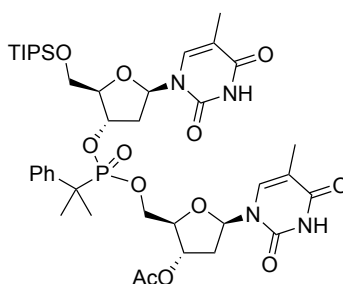

The product **3aa** was purified by flash chromatography on silica gel (80:20:0–50:45:5, hexane/EtOAc/MeOH) (Table 2, entry 2; 29.6 mg, 0.035 mmol, 70% isolated yield). The ratio (before isolation: 1.2:1→after isolation: 1:1) of diastereomers was determined by <sup>31</sup>P-NMR analysis. White amorphous solid. <sup>1</sup>H NMR (400 MHz, CDCl<sub>3</sub>) δ 9.07–8.98 (m, 2H), 7.55–7.23 (m, 7H), 6.29–6.24 (m, 2H), 5.14 (m, 1H), 4.86 (t, *J* = 5.8 Hz, 0.5H), 4.60 (t, *J* = 6.0 Hz, 0.5H), 4.26–4.11 (m, 3.5H), 3.87 (m, 1H), 3.71 (m, 1H), 3.39 (m, 0.5H), 2.45–2.34 (m, 1.5H), 2.10–1.85 (m, 11.5H), 1.70–1.65 (m, 6H), 1.10–1.03 (m, 21H). <sup>13</sup>C NMR (100.6 MHz, CDCl<sub>3</sub>) δ 170.5, 170.3, 163.6, 163.5, 150.3, 140.2, 140.2, 140.0, 139.9, 135.1, 134.8, 134.6, 128.4, 128.4, 128.4, 127.7, 127.7, 127.6, 127.5, 127.4, 127.4, 127.4, 111.6, 111.5, 111.2, 86.8, 86.8, 85.6, 85.6, 84.7, 84.7, 84.3, 83.0, 82.9, 82.8, 82.7, 78.5, 78.5, 78.4, 78.3, 73.9, 73.9, 65.6, 65.5, 64.8, 64.8, 63.2, 40.1, 40.1, 39.9, 39.0, 38.9, 38.8, 38.7, 37.2, 37.2, 24.5, 24.5, 24.1, 24.1, 23.7, 23.7, 23.5, 23.5, 20.8, 18.0, 18.0, 18.0, 12.6, 12.3, 12.3, 12.2, 11.7, 11.7 (only observed peaks). <sup>31</sup>P NMR (162 MHz, CDCl<sub>3</sub>) δ 34.6, 33.5. HRMS–ESI (*m/z*): [M+H]<sup>+</sup> calcd for C<sub>40</sub>H<sub>60</sub>N<sub>4</sub>O<sub>12</sub>PSi, 847.3709; found, 847.3710.

### The separation of the diastereomers of **3aa**.

The crude residue of **3aa** (from 20 × 0.05 mmol scale) was purified with column chromatography (silica gel, hexane/EtOAc/MeOH = 50:50:0 to 42.5:42.5:15), and then the fractions containing the diastereomers mixture were collected and further purified by preparative HPLC (Reverse phase, C18 column, 10mM NH<sub>4</sub>HCO<sub>3</sub> aq./MeCN = 30/70 to 15/85) to obtain 200 mg (0.24 mmol) of (**R<sub>P</sub>**)-**3aa** and 250 mg (0.30 mmol) of (**S<sub>P</sub>**)-**3aa**.

50 mg of the single diastereomer [identified as (**R<sub>P</sub>**)-**3aa**] was weighed out and transferred to a clean glass tube. About 1 mL of acetonitrile was added to the tube and the mixture was heated until the solid dissolved completely. To the solution was added water (2~3 mL) quietly and the solution was allowed to cool slowly to room temperature. The solution was then placed in the fridge to further promote crystal formation. The crystals were collected using a filtration apparatus and washed with a small amount of water. The crystals were then dried in vacuo.

### *tert*-Alkylphosphonate **3ba**

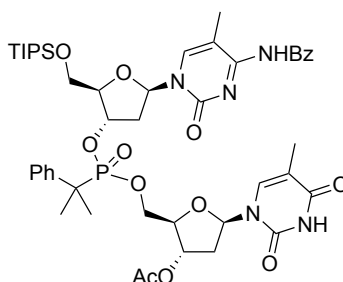

The product **3ba** was purified by flash chromatography on silica gel (80:20:0–50:45:5, hexane/EtOAc/MeOH) (Figure 2; 24.7 mg, 0.026 mmol, 52% isolated yield). The ratio (before isolation: 1.2:1) of diastereomers was determined by <sup>31</sup>P-NMR analysis. The diastereomers **3ba-d1** and **3ba-d2** were separated and data were measured respectively.

### **3ba-d1**

White amorphous solid.  $^1\text{H NMR}$  (400 MHz,  $\text{CDCl}_3$ )  $\delta$  13.29 (brs, 1H), 8.32–8.30 (m, 2H), 8.15 (brs, 1H), 7.56–7.51 (m, 4H), 7.46–7.42 (m, 2H), 7.36–7.32 (m, 2H), 7.27–7.24 (m, 2H), 6.30–6.24 (m, 2H), 5.14 (m, 1H), 4.61 (t,  $J = 6.0$  Hz, 1H), 4.25 (m, 1H), 4.15–4.13 (m, 2H), 4.07 (m, 1H), 3.92–3.86 (m, 2H), 2.37 (m, 1H), 2.17 (m, 1H), 2.10–2.07 (m, 6H), 1.99 (d,  $J = 1.2$  Hz, 3H), 1.93–1.84 (m, 2H), 1.70–1.65 (m, 6H), 1.14–1.03 (m, 21H).  $^{13}\text{C NMR}$  (100.6 MHz,  $\text{CDCl}_3$ )  $\delta$  170.3, 163.0, 159.6, 149.9, 147.8, 140.0, 139.9, 137.1, 136.0, 134.6, 132.5, 129.9, 128.5, 128.5, 128.1, 127.6, 127.6, 127.5, 112.0, 111.6, 87.2, 85.0, 84.8, 82.8, 82.8, 78.6, 78.5, 73.9, 64.9, 64.8, 63.3, 40.1, 39.4, 39.3, 38.8, 37.2, 24.2, 24.1, 23.7, 23.7, 20.9, 18.0, 18.0, 13.4, 12.6, 11.8 (only observed peaks).  $^{31}\text{P NMR}$  (162 MHz,  $\text{CDCl}_3$ )  $\delta$  34.7. **HRMS–ESI** ( $m/z$ ):  $[\text{M}+\text{H}]^+$  calcd for  $\text{C}_{47}\text{H}_{65}\text{N}_5\text{O}_{12}\text{PSi}$ , 950.4131; found, 950.4128.

### 3ba-d2

White amorphous solid.  $^1\text{H NMR}$  (400 MHz,  $\text{CDCl}_3$ )  $\delta$  13.29 (brs, 1H), 8.32–8.29 (m, 2H), 8.13 (m, 1H), 7.57–7.42 (m, 7H), 7.37–7.34 (m, 2H), 7.28 (m, 1H), 6.29–6.22 (m, 2H), 5.14 (m, 1H), 4.89 (t,  $J = 6.4$  Hz, 1H), 4.25–4.08 (m, 3H), 3.75–3.72 (m, 2H), 3.41 (m, 1H), 2.53 (dd,  $J = 13.6, 4.8$  Hz, 1H), 2.38 (m, 1H), 2.10–2.03 (m, 7H), 1.99 (d,  $J = 1.2$  Hz, 3H), 1.85 (m, 1H), 1.69–1.64 (m, 6H), 1.13–1.04 (m, 21H).  $^{13}\text{C NMR}$  (100.6 MHz,  $\text{CDCl}_3$ )  $\delta$  170.5, 163.2, 159.6, 149.9, 147.9, 140.2, 137.1, 136.0, 135.1, 132.5, 129.9, 128.4, 128.4, 128.1, 127.7, 127.7, 127.4, 127.4, 112.0, 111.5, 86.0, 85.9, 84.9, 84.8, 83.0, 83.0, 78.5, 78.4, 73.8, 65.5, 65.4, 63.3, 40.3, 40.3, 40.1, 38.8, 37.2, 24.5, 24.5, 23.6, 23.5, 20.9, 18.0, 13.4, 12.3, 11.7 (only observed peaks).  $^{31}\text{P NMR}$  (162 MHz,  $\text{CDCl}_3$ )  $\delta$  33.6. **HRMS–ESI** ( $m/z$ ):  $[\text{M}+\text{H}]^+$  calcd for  $\text{C}_{47}\text{H}_{65}\text{N}_5\text{O}_{12}\text{PSi}$ , 950.4131; found, 950.4131.

### tert-Alkylphosphonate 3ca

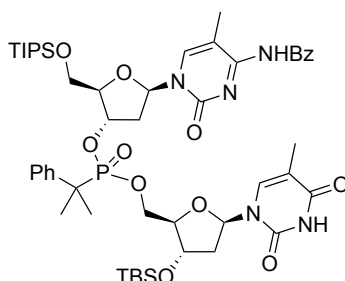

The product **3ca** was purified by flash chromatography on silica gel (80:20:0–50:45:5, hexane/EtOAc/MeOH) (Figure 2; 25.6 mg, 0.025 mmol, 50% isolated yield). The ratio (before isolation: 1.1:1→after isolation: 1.3:1) of diastereomers was determined by  $^{31}\text{P}$ -NMR analysis. White amorphous solid.  $^1\text{H NMR}$  (400 MHz,  $\text{CDCl}_3$ )  $\delta$  13.30 (brs, 1H), 8.37–8.30 (m, 3H), 7.58–7.22 (m, 10H), 6.30–6.17 (m, 2H), 4.88 (t,  $J = 6.0$  Hz, 0.43H), 4.63 (t,  $J = 6.0$  Hz, 0.57H), 4.24 (m, 1H), 4.12–3.88 (m, 4.57H), 3.76 (m, 1H), 3.49 (m, 0.43H), 2.50 (m, 0.43H), 2.22–1.77 (m, 9.57H), 1.70–1.64 (m, 6H), 1.11–1.05 (m, 21H), 0.89 (s, 9H), 0.08–0.07 (m, 6H).  $^{13}\text{C NMR}$  (100.6 MHz,  $\text{CDCl}_3$ )  $\delta$  179.6, 163.4, 163.3, 159.6, 149.9, 147.8, 140.4, 140.1, 140.0, 137.1, 136.0, 135.7, 135.1, 132.5, 129.9, 128.4, 128.4, 128.4, 128.1, 127.8, 127.7, 127.6, 127.5, 127.4, 127.3, 112.0, 112.0, 111.2, 111.1, 87.2, 86.1, 85.4, 85.3, 85.3, 85.1, 85.0, 78.3, 78.3, 78.0, 77.9, 71.8, 71.6, 65.5, 65.4, 64.4, 64.3, 63.3, 63.2, 40.6, 40.5, 40.3, 40.2, 40.1, 39.4, 39.3, 38.8, 38.7, 25.7, 24.2, 24.1, 24.0, 23.8, 23.6, 18.0, 18.0, 18.0, 17.9, 13.4, 13.4, 12.6, 12.3, 11.8, 11.7, –4.7, –4.8, –4.9 (only observed peaks).  $^{31}\text{P NMR}$  (162

MHz, CDCl<sub>3</sub>)  $\delta$  34.7, 33.2. **HRMS–ESI** ( $m/z$ ): [M+H]<sup>+</sup> calcd for C<sub>51</sub>H<sub>77</sub>N<sub>5</sub>O<sub>11</sub>PSi<sub>2</sub>, 1022.4890; found, 1022.4885.

### *tert*-Alkylphosphonate **3da**

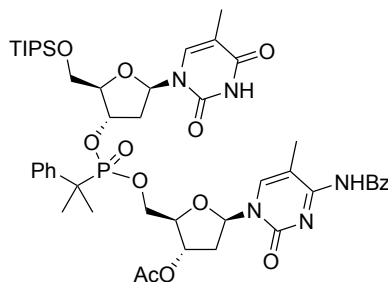

The product **3da** was purified by flash chromatography on silica gel (80:20:0–50:45:5, hexane/EtOAc/MeOH) (Figure 2; 21.9 mg, 0.023 mmol, 46% isolated yield). The ratio (before isolation: 1.1:1→after isolation: 1:1) of diastereomers was determined by <sup>31</sup>P-NMR analysis. White amorphous solid. <sup>1</sup>H NMR (400 MHz, CDCl<sub>3</sub>)  $\delta$  13.29 (brs, 1H), 8.42–8.32 (m, 3H), 7.72–7.25 (m, 10H), 6.30–6.24 (m, 2H), 5.14 (m, 1H), 4.89 (t,  $J$  = 6.0 Hz, 0.5H), 4.66 (t,  $J$  = 6.0 Hz, 0.5H), 4.28–4.08 (m, 3.5H), 3.88 (m, 1H), 3.72 (m, 1H), 3.42 (m, 0.5H), 2.47–2.42 (m, 1.5H), 2.18–2.17 (m, 3H), 2.12–2.04 (m, 4H), 1.91–1.81 (m, 4.5H), 1.71–1.65 (m, 6H), 1.10–1.04 (m, 21H). <sup>13</sup>C NMR (100.6 MHz, CDCl<sub>3</sub>)  $\delta$  179.7, 170.5, 170.3, 163.3, 159.6, 159.4, 150.1, 147.8, 140.2, 140.2, 140.0, 139.9, 137.1, 137.0, 136.3, 135.6, 134.8, 134.8, 132.6, 132.5, 129.9, 128.5, 128.4, 128.4, 128.1, 128.1, 127.7, 127.7, 127.6, 127.5, 127.4, 112.5, 112.4, 111.2, 86.9, 85.7, 85.6, 85.3, 85.2, 84.4, 84.3, 83.3, 83.2, 83.1, 83.0, 78.5, 78.4, 78.3, 73.9, 65.4, 65.4, 64.8, 64.7, 63.3, 40.1, 40.1, 39.9, 39.1, 39.0, 38.8, 38.8, 37.5, 37.5, 24.5, 24.5, 24.1, 24.1, 23.7, 23.6, 20.8, 18.0, 18.0, 18.0, 13.7, 13.4, 12.3, 12.2, 11.8, 11.7 (only observed peaks). <sup>31</sup>P NMR (162 MHz, CDCl<sub>3</sub>)  $\delta$  34.7, 33.7. **HRMS–ESI** ( $m/z$ ): [M+H]<sup>+</sup> calcd for C<sub>47</sub>H<sub>65</sub>N<sub>5</sub>O<sub>12</sub>PSi, 950.4131; found, 950.4133.

### *tert*-Alkylphosphonate **3ea**

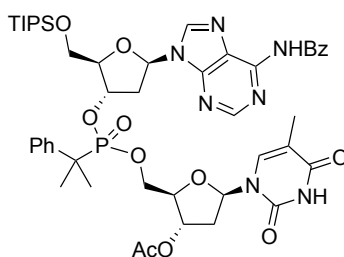

The product **3ea** was purified by flash chromatography on silica gel (50:50:0–50:42:8, hexane/EtOAc/MeOH) (Figure 2; 15.8 mg, 0.017 mmol, 33% isolated yield). The ratio (before isolation: 1.1:1) of diastereomers was determined by <sup>31</sup>P-NMR analysis. The diastereomers **3ea-d1** and **3ea-d2** were separated and data were measured respectively.

#### **3ea-d1**

White amorphous solid. <sup>1</sup>H NMR (400 MHz, CDCl<sub>3</sub>)  $\delta$  9.08 (brs, 1H), 8.81 (s, 1H), 8.69 (brs, 1H), 8.28 (s, 1H), 8.03 (d,  $J$  = 7.2 Hz, 2H), 7.62–7.28 (m, 9H), 6.51 (m, 1H), 6.18 (m, 1H), 5.12–5.08 (m, 2H), 4.24–4.12 (m, 3H), 3.94 (s, 1H), 3.79 (m, 1H), 3.50 (m, 1H), 2.81–2.71 (m, 2H), 2.32 (m, 1H),

2.07 (s, 3H), 1.99 (s, 3H), 1.80–1.68 (m, 7H), 1.12–1.03 (m, 21H).  $^{13}\text{C}$  NMR (100.6 MHz,  $\text{CDCl}_3$ )  $\delta$  170.5, 163.3, 150.0, 140.4, 140.3, 135.3, 133.6, 132.8, 132.8, 128.8, 128.5, 128.5, 128.0, 127.7, 127.6, 127.4, 127.4, 111.5, 86.4, 86.4, 85.2, 84.3, 83.2, 83.2, 78.6, 78.6, 74.0, 63.3, 40.2, 37.0, 29.7, 29.6, 24.6, 24.5, 23.7, 23.6, 20.9, 18.0, 12.4, 11.8 (only observed peaks).  $^{31}\text{P}$  NMR (162 MHz,  $\text{CDCl}_3$ )  $\delta$  33.8. HRMS–ESI ( $m/z$ ):  $[\text{M}+\text{H}]^+$  calcd for  $\text{C}_{47}\text{H}_{63}\text{N}_7\text{O}_{11}\text{PSi}$ , 960.4087; found, 960.4096.

### 3ea-d2

White amorphous solid.  $^1\text{H}$  NMR (400 MHz,  $\text{CDCl}_3$ )  $\delta$  9.00 (brs, 1H), 8.82 (s, 1H), 8.25 (brs, 1H), 8.21 (s, 1H), 8.03 (d,  $J = 7.2$  Hz, 2H), 7.64–7.51 (m, 5H), 7.37–7.33 (m, 2H), 7.28–7.22 (m, 2H), 6.37 (m, 1H), 6.27 (m, 1H), 5.16 (m, 1H), 4.87 (t,  $J = 6.0$  Hz, 1H), 4.33–4.24 (m, 2H), 4.17–4.11 (m, 2H), 3.93–3.84 (m, 2H), 2.55 (m, 1H), 2.39 (m, 1H), 2.21 (m, 1H), 2.11 (s, 3H), 2.00–1.91 (m, 4H), 1.73–1.69 (m, 6H), 1.14–1.02 (m, 21H).  $^{13}\text{C}$  NMR (100.6 MHz,  $\text{CDCl}_3$ )  $\delta$  170.3, 163.1, 149.9, 141.1, 134.7, 132.8, 128.9, 128.5, 128.5, 127.9, 127.6, 127.6, 127.5, 111.6, 87.2, 84.9, 84.2, 82.9, 82.8, 78.6, 78.5, 73.9, 64.9, 63.2, 40.1, 39.2, 39.2, 38.8, 37.2, 24.3, 24.3, 23.7, 23.6, 20.9, 18.0, 12.7, 11.8 (only observed peaks).  $^{31}\text{P}$  NMR (162 MHz,  $\text{CDCl}_3$ )  $\delta$  34.3. HRMS–ESI ( $m/z$ ):  $[\text{M}+\text{H}]^+$  calcd for  $\text{C}_{47}\text{H}_{63}\text{N}_7\text{O}_{11}\text{PSi}$ , 960.4087; found, 960.4088.

### tert-Alkylphosphonate 3fa

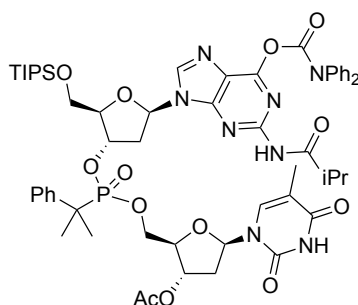

The product **3fa** (from total 0.45 mmol scale synthesis) was purified with column chromatography (silica gel, hexane/EtOAc/MeOH = 50:50:0 to 50:40:10), and then the fractions containing the product were collected and further purified by preparative HPLC (30:70–0:100, 10mM  $\text{NH}_4\text{HCO}_3$  in  $\text{H}_2\text{O}/\text{MeCN}$ ) (Figure 2; 25.6 mg, 0.023 mmol, 5% isolated yield). The ratio (before isolation: 1.1:1) of diastereomers was determined by  $^{31}\text{P}$ -NMR analysis. The diastereomers **3fa-d1** and **3fa-d2** were separated and data were measured respectively.

### 3fa-d1

Off-white amorphous solid.  $^1\text{H}$  NMR (400 MHz,  $\text{CDCl}_3$ )  $\delta$  8.36–8.26 (m, 2H), 8.12 (s, 1H), 7.59–7.21 (m, 16H), 6.29–6.25 (m, 2H), 5.18 (m, 1H), 4.86 (t,  $J = 6.0$  Hz, 1H), 4.32–4.12 (m, 4H), 3.90–3.82 (m, 2H), 2.38 (m, 1H), 2.20–2.08 (m, 6H), 2.01–1.95 (m, 4H), 1.72–1.68 (m, 6H), 1.27 (d,  $J = 6.8$  Hz, 6H), 1.05–1.00 (m, 21H).  $^{13}\text{C}$  NMR (100.6 MHz,  $\text{CDCl}_3$ )  $\delta$  170.3, 163.3, 156.0, 154.6, 152.1, 150.4, 150.0, 142.0, 140.1, 140.0, 134.8, 129.1, 128.5, 128.4, 127.6, 127.6, 127.5, 126.8, 121.2, 111.5, 87.3, 84.7, 83.9, 82.7, 82.7, 78.5, 78.4, 73.8, 64.9, 64.8, 63.2, 40.1, 39.3, 39.3, 38.8, 37.2, 36.0, 24.3, 24.3, 23.6, 23.6, 20.9, 19.3, 18.0, 18.0, 12.7, 11.8 (only observed peaks).  $^{31}\text{P}$  NMR (162 MHz,  $\text{CDCl}_3$ )  $\delta$  34.6. HRMS–ESI ( $m/z$ ):  $[\text{M}+\text{H}]^+$  calcd for  $\text{C}_{57}\text{H}_{74}\text{N}_8\text{O}_{13}\text{PSi}$ , 1137.4877; found, 1137.4885.

### 3fa-d2

Off-white amorphous solid.  $^1\text{H NMR}$  (400 MHz,  $\text{CDCl}_3$ )  $\delta$  8.41–8.24 (m, 2H), 8.17 (s, 1H), 7.58–7.24 (m, 16H), 6.42 (m, 1H), 6.16 (dd  $J = 8.8, 5.2$  Hz, 1H), 5.13 (m, 1H), 5.03 (m, 1H), 4.26–4.12 (m, 3H), 3.89 (m, 1H), 3.74 (m, 1H), 3.49 (m, 1H), 2.77–2.67 (m, 2H), 2.31 (m, 1H), 2.12–2.06 (m, 4H), 2.00–1.99 (m, 3H), 1.81 (m, 1H), 1.71–1.67 (m, 6H), 1.25 (d,  $J = 6.8$  Hz, 6H), 1.05–1.02 (m, 21H).  $^{13}\text{C NMR}$  (100.6 MHz,  $\text{CDCl}_3$ )  $\delta$  170.5, 163.4, 156.0, 154.6, 152.1, 150.4, 149.9, 142.1, 141.8, 140.4, 140.4, 135.5, 129.2, 128.4, 128.4, 127.7, 127.6, 127.4, 121.3, 111.4, 86.3, 86.3, 85.2, 84.2, 83.1, 83.0, 78.6, 78.6, 73.9, 65.6, 65.5, 63.3, 40.2, 38.9, 37.0, 24.5, 24.5, 23.7, 23.6, 20.8, 19.3, 19.3, 18.0, 12.3, 11.8 (only observed peaks).  $^{31}\text{P NMR}$  (162 MHz,  $\text{CDCl}_3$ )  $\delta$  33.5. **HRMS–ESI** ( $m/z$ ):  $[\text{M}+\text{H}]^+$  calcd for  $\text{C}_{57}\text{H}_{74}\text{N}_8\text{O}_{13}\text{PSi}$ , 1137.4877; found, 1137.4891.

### tert-Alkylphosphonate 3ab

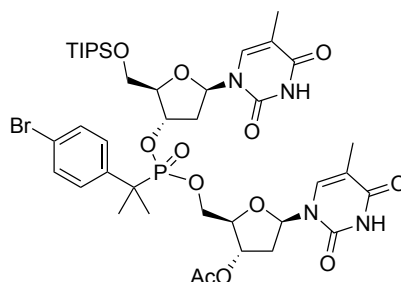

The product **3ab** was purified by flash chromatography on silica gel (80:20:0–50:45:5, hexane/EtOAc/MeOH) (Figure 2; 26.9 mg, 0.029 mmol, 58% isolated yield). The ratio (before isolation: 1.2:1→after isolation: 1:1) of diastereomers was determined by  $^{31}\text{P}$ -NMR analysis. White amorphous solid.  $^1\text{H NMR}$  (400 MHz,  $\text{CDCl}_3$ )  $\delta$  8.93–8.86 (m, 2H), 7.49–7.24 (m, 6H), 6.29–6.24 (m, 2H), 5.15 (m, 1H), 4.86 (t,  $J = 6.0$  Hz, 0.5H), 4.57 (t,  $J = 5.8$  Hz, 0.5H), 4.28–4.09 (m, 3.5H), 3.91–3.72 (m, 2H), 3.38 (m, 0.5H), 2.47–2.38 (m, 1.5H), 2.11–1.88 (m, 11.5H), 1.66–1.61 (m, 6H), 1.15–1.00 (m, 21H).  $^{13}\text{C NMR}$  (100.6 MHz,  $\text{CDCl}_3$ )  $\delta$  170.7, 170.5, 170.3, 163.6, 163.5, 150.5, 150.3, 150.2, 139.4, 139.4, 139.1, 139.1, 136.1, 135.1, 134.8, 134.7, 134.6, 131.5, 131.5, 131.4, 129.6, 129.5, 129.5, 129.4, 121.8, 121.7, 121.7, 121.6, 111.7, 111.6, 111.4, 111.3, 111.3, 86.9, 85.9, 85.6, 85.6, 85.0, 84.9, 84.3, 84.3, 82.9, 82.9, 82.7, 82.7, 78.8, 78.7, 78.5, 78.4, 74.7, 73.7, 65.8, 65.7, 64.9, 64.9, 63.2, 62.6, 40.0, 39.9, 39.0, 39.0, 38.7, 38.6, 37.2, 24.5, 24.4, 24.1, 24.1, 23.5, 23.5, 23.5, 23.4, 21.0, 20.8, 18.0, 12.6, 12.6, 12.4, 12.3, 11.8, 11.7 (only observed peaks).  $^{31}\text{P NMR}$  (162 MHz,  $\text{CDCl}_3$ )  $\delta$  33.7, 32.7. **HRMS–ESI** ( $m/z$ ):  $[\text{M}+\text{H}]^+$  calcd for  $\text{C}_{40}\text{H}_{59}\text{BrN}_4\text{O}_{12}\text{PSi}$ , 925.2814; found, 925.2816.

### tert-Alkylphosphonate 3ac

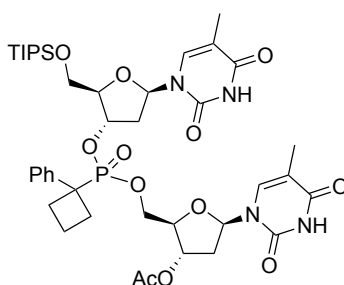

The product **3ac** was purified by flash chromatography on silica gel (80:20:0–50:45:5, hexane/EtOAc/MeOH) (Figure 2; 26.6 mg, 0.031 mmol, 62% isolated yield). The ratio (crude 1.1:1

→isolated 1.1:1) of diastomers was determined by  $^{31}\text{P}$ -NMR analysis. White amorphous solid.  $^1\text{H}$  NMR (400 MHz,  $\text{CDCl}_3$ )  $\delta$  8.94–8.82 (m, 2H), 7.49–7.16 (m, 7H), 6.32–6.23 (m, 2H), 5.18 (m, 1H), 4.95 (t,  $J = 5.8$  Hz, 0.48H), 4.69 (t,  $J = 6.0$  Hz, 0.52H), 4.33–4.08 (m, 3.52H), 3.91–3.79 (m, 2H), 3.62 (m, 0.48H), 2.95–2.88 (m, 2H), 2.68–2.56 (m, 2H), 2.50–2.23 (m, 3H), 2.11–1.89 (m, 12H), 1.15–1.03 (m, 21H).  $^{13}\text{C}$  NMR (100.6 MHz,  $\text{CDCl}_3$ )  $\delta$  170.4, 170.4, 163.5, 163.4, 150.2, 141.6, 141.6, 141.5, 141.5, 135.1, 134.8, 134.8, 134.5, 128.3, 128.2, 128.2, 127.5, 127.5, 127.5, 127.5, 127.0, 126.9, 111.8, 111.6, 111.2, 111.2, 86.7, 85.8, 85.7, 84.7, 84.6, 84.4, 84.3, 83.0, 82.9, 82.7, 82.7, 78.3, 78.2, 78.2, 73.7, 73.7, 65.8, 65.8, 65.1, 65.1, 63.4, 63.2, 45.7, 45.6, 44.3, 44.2, 39.8, 39.3, 39.3, 37.2, 37.1, 30.9, 30.8, 30.5, 30.5, 30.5, 30.4, 29.7, 20.9, 18.0, 18.0, 18.0, 17.2, 17.2, 12.6, 12.3, 12.3, 11.7 (only observed peaks).  $^{31}\text{P}$  NMR (162 MHz,  $\text{CDCl}_3$ )  $\delta$  31.9, 30.8. HRMS–ESI ( $m/z$ ):  $[\text{M}+\text{H}]^+$  calcd for  $\text{C}_{41}\text{H}_{60}\text{N}_4\text{O}_{12}\text{PSi}$ , 859.3709; found, 859.3714.

### *tert*-Alkylphosphonate **3ad**

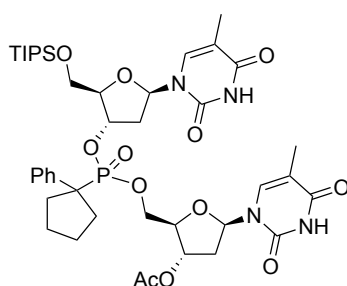

The product **3ad** was purified by flash chromatography on silica gel (80:20:0–50:45:5, hexane/EtOAc/MeOH) (Figure 2; 14.8 mg, 0.017 mmol, 34% isolated yield). The ratio (before isolation: 1.2:1→after isolation: 1.2:1) of diastomers was determined by  $^{31}\text{P}$ -NMR analysis. White amorphous solid.  $^1\text{H}$  NMR (400 MHz,  $\text{CDCl}_3$ )  $\delta$  8.63–8.51 (m, 2H), 7.49–7.15 (m, 7H), 6.28–6.20 (m, 2H), 5.12 (m, 1H), 4.90 (t,  $J = 5.6$  Hz, 0.45H), 4.65 (t,  $J = 5.8$  Hz, 0.55H), 4.24–4.04 (m, 3.55H), 3.88–3.76 (m, 2H), 3.56 (m, 0.45H), 2.46–1.83 (m, 21H), 1.14–1.03 (m, 21H).  $^{13}\text{C}$  NMR (100.6 MHz,  $\text{CDCl}_3$ )  $\delta$  170.4, 170.3, 163.4, 150.1, 139.3, 135.2, 134.8, 134.6, 128.5, 128.5, 128.3, 127.3, 111.7, 111.5, 111.2, 86.7, 85.7, 84.8, 84.6, 84.3, 82.7, 78.2, 78.1, 73.8, 73.7, 65.6, 65.0, 64.9, 63.4, 63.3, 51.9, 51.9, 50.5, 39.8, 39.2, 39.2, 37.1, 35.1, 35.0, 34.2, 34.1, 24.2, 24.2, 20.9, 18.0, 18.0, 18.0, 12.6, 12.3, 12.3, 11.8 (only observed peaks).  $^{31}\text{P}$  NMR (162 MHz,  $\text{CDCl}_3$ )  $\delta$  34.2, 33.1. HRMS–ESI ( $m/z$ ):  $[\text{M}+\text{H}]^+$  calcd for  $\text{C}_{42}\text{H}_{62}\text{N}_4\text{O}_{12}\text{PSi}$ , 873.3866; found, 873.3863.

### *tert*-Alkylphosphonate **3ae**

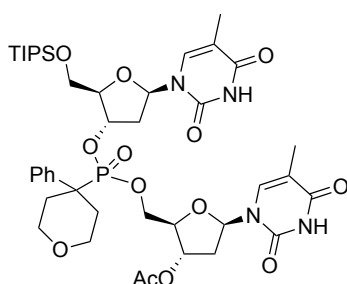

The product **3ae** was purified by flash chromatography on silica gel (80:20:0–50:45:5, hexane/EtOAc/MeOH) (Figure 2; 22.7 mg, 0.026 mmol, 51% isolated yield). The ratio (crude 1.2:1 →isolated 1.2:1) of diastomers was determined by  $^{31}\text{P}$ -NMR analysis. White amorphous solid.  $^1\text{H}$



**NMR** (400 MHz, CDCl<sub>3</sub>)  $\delta$  8.69–8.51 (m, 2H), 7.48–7.22 (m, 7H), 6.28–6.20 (m, 2H), 5.16 (m, 1H), 4.84 (t,  $J$  = 6.0 Hz, 0.43H), 4.45 (t,  $J$  = 5.6 Hz, 0.57H), 4.26–4.05 (m, 3.57H), 3.86–3.74 (m, 4H), 3.54–3.50 (m, 1.43H), 3.40 (m, 1H), 2.46–2.34 (m, 5H), 2.11–1.80 (m, 12H), 1.13–1.02 (m, 21H). **<sup>13</sup>C NMR** (100.6 MHz, CDCl<sub>3</sub>)  $\delta$  170.4, 170.4, 163.4, 163.3, 163.2, 150.2, 150.1, 135.3, 134.8, 134.4, 129.3, 129.3, 129.2, 129.2, 129.0, 128.9, 127.7, 127.7, 127.6, 111.7, 111.6, 111.2, 86.9, 85.6, 85.5, 85.0, 84.3, 84.3, 82.9, 82.8, 82.7, 82.6, 78.8, 78.7, 78.4, 73.7, 73.6, 65.1, 65.0, 63.3, 63.2, 62.9, 62.8, 62.7, 43.1, 41.7, 39.9, 39.0, 37.1, 37.1, 30.5, 29.7, 29.6, 20.8, 18.0, 18.0, 18.0, 12.6, 12.3, 11.7 (only observed peaks). **<sup>31</sup>P NMR** (162 MHz, CDCl<sub>3</sub>)  $\delta$  30.2, 29.1. **HRMS–ESI** ( $m/z$ ): [M+H]<sup>+</sup> calcd for C<sub>42</sub>H<sub>62</sub>N<sub>4</sub>O<sub>13</sub>PSi, 889.3815; found, 889.3814.

### *tert*-Alkylphosphonate **3af**

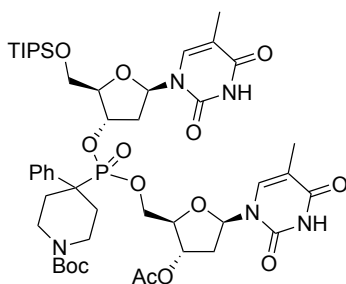

The product **3af** was purified by flash chromatography on silica gel (80:20:0–50:45:5, hexane/EtOAc/MeOH) (Figure 2; 14.8 mg, 0.015 mmol, 30% isolated yield). The ratio (crude 1.3:1 → isolated 2.2:1) of diastomers was determined by <sup>31</sup>P-NMR analysis. White amorphous solid. **<sup>1</sup>H NMR** (400 MHz, CDCl<sub>3</sub>)  $\delta$  8.39–8.20 (m, 2H), 7.47–7.17 (m, 7H), 6.27–6.16 (m, 2H), 5.13 (m, 1H), 4.84 (m, 0.31H), 4.44 (m, 0.69H), 4.22–3.53 (m, 10H), 2.84–2.74 (m, 2H), 2.54–2.32 (m, 4H), 2.11–2.07 (m, 5H), 1.96–1.88 (m, 6H), 1.43–1.42 (m, 9H), 1.10–1.02 (m, 21H). **<sup>13</sup>C NMR** (100.6 MHz, CDCl<sub>3</sub>)  $\delta$  170.4, 170.3, 163.2, 163.2, 163.1, 154.8, 150.0, 149.9, 135.5, 134.8, 129.3, 129.3, 129.2, 129.2, 129.0, 129.0, 128.9, 128.9, 127.8, 127.7, 111.7, 111.5, 111.2, 86.9, 85.3, 84.3, 82.7, 79.9, 77.7, 73.5, 70.5, 63.2, 37.0, 37.0, 29.7, 28.4, 28.3, 20.8, 18.0, 18.0, 18.0, 12.6, 12.3, 12.3, 11.8, 11.7 (only observed peaks). **<sup>31</sup>P NMR** (162 MHz, CDCl<sub>3</sub>)  $\delta$  30.6, 29.5. **HRMS–ESI** ( $m/z$ ): [M+NH<sub>4</sub>]<sup>+</sup> calcd for C<sub>47</sub>H<sub>74</sub>N<sub>6</sub>O<sub>14</sub>PSi, 1005.4764; found, 1005.4765.

### *tert*-Alkylphosphonate **3ag**

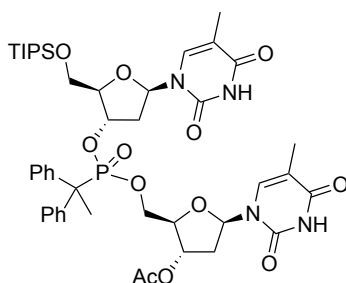

The product **3ag** was purified by flash chromatography on silica gel (80:20:0–50:45:5, hexane/EtOAc/MeOH) (Figure 2; 20.0 mg, 0.022 mmol, 44% isolated yield). The ratio (crude 1.2:1 → isolated 1.2:1) of diastomers was determined by <sup>31</sup>P-NMR analysis. White amorphous solid. **<sup>1</sup>H NMR** (400 MHz, CDCl<sub>3</sub>)  $\delta$  8.48–8.38 (m, 2H), 7.52–7.07 (m, 12H), 6.27–6.20 (m, 2H), 5.19 (m, 0.55H), 5.06 (m, 0.45H), 4.93 (t,  $J$  = 6.0 Hz, 0.45H), 4.42 (m, 1H), 4.27 (m, 0.55H), 4.17–4.11 (m,

2.55H), 3.87 (m, 1H), 3.63 (m, 0.55H), 3.50 (s, 0.45H), 3.29 (m, 0.45H), 2.50 (m, 0.45H), 2.30 (m, 1H), 2.10–2.02 (m, 6H), 1.97–1.69 (m, 8.55H), 1.12–1.03 (m, 21H).  $^{13}\text{C}$  NMR (100.6 MHz,  $\text{CDCl}_3$ )  $\delta$  170.6, 170.3, 163.5, 163.5, 163.4, 163.3, 150.2, 150.2, 142.7, 142.7, 142.5, 142.5, 140.8, 140.8, 140.3, 140.3, 134.9, 134.8, 134.5, 129.2, 129.1, 129.0, 129.0, 128.5, 128.4, 128.3, 128.2, 127.5, 127.2, 111.7, 111.6, 111.2, 111.2, 87.1, 85.3, 85.3, 84.6, 84.5, 84.3, 83.0, 82.9, 82.7, 82.6, 79.2, 79.2, 79.2, 79.1, 74.0, 74.0, 65.8, 65.7, 65.1, 65.0, 63.3, 63.2, 51.0, 50.9, 49.6, 49.6, 40.0, 38.8, 38.7, 37.0, 29.7, 25.1, 25.0, 20.8, 18.0, 18.0, 18.0, 18.0, 12.5, 12.3, 12.2, 12.1, 11.8, 11.7 (only observed peaks).  $^{31}\text{P}$  NMR (162 MHz,  $\text{CDCl}_3$ )  $\delta$  31.1, 30.0. HRMS–ESI ( $m/z$ ):  $[\text{M}+\text{NH}_4]^+$  calcd for  $\text{C}_{45}\text{H}_{65}\text{N}_5\text{O}_{12}\text{PSi}$ , 926.4131; found, 926.4140.

### *tert*-Alkylphosphonate **3ah**

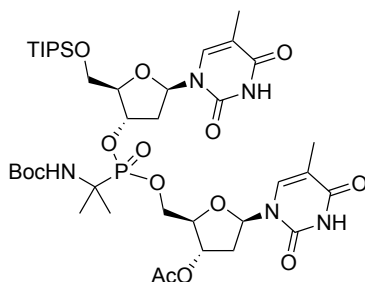

The product **3ah** was purified by flash chromatography on silica gel (80:20:0–50:45:5, hexane/EtOAc/MeOH) (Figure 2; 34.1 mg, 0.039 mmol, 77% isolated yield). The ratio (crude 1:1 → isolated 1:1) of diastereomers was determined by  $^{31}\text{P}$ -NMR analysis. Off-white amorphous solid.  $^1\text{H}$  NMR (400 MHz,  $\text{CDCl}_3$ )  $\delta$  8.46–8.32 (m, 2H), 7.62 (s, 0.5H), 7.45–7.36 (m, 1.5H), 6.38–6.27 (m, 2H), 5.27–5.17 (m, 2H), 4.89 (d,  $J = 4.4$  Hz, 0.5H), 4.76 (d,  $J = 4.0$  Hz, 0.5H), 4.41–4.19 (m, 4H), 4.03–3.94 (m, 2H), 2.58 (m, 1H), 2.44 (m, 1H), 2.30–2.10 (m, 5H), 1.95–1.91 (m, 6H), 1.63–1.55 (m, 6H), 1.42–1.41 (m, 9H), 1.17–1.08 (m, 21H).  $^{13}\text{C}$  NMR (100.6 MHz,  $\text{CDCl}_3$ )  $\delta$  170.5, 170.3, 163.8, 163.7, 163.6, 154.2, 154.2, 154.1, 150.5, 150.4, 150.4, 150.4, 135.4, 134.9, 134.9, 111.8, 111.7, 111.2, 111.2, 86.7, 85.8, 85.7, 85.0, 84.7, 84.4, 82.9, 82.8, 82.7, 82.7, 79.9, 79.8, 78.6, 78.5, 78.3, 78.3, 73.9, 73.8, 66.2, 66.1, 65.3, 65.3, 63.4, 63.3, 52.8, 52.8, 51.3, 51.2, 39.8, 39.3, 39.2, 37.0, 36.8, 28.3, 23.8, 23.8, 23.5, 23.3, 20.8, 18.0, 12.4, 12.3, 12.2, 11.8 (only observed peaks).  $^{31}\text{P}$  NMR (162 MHz,  $\text{CDCl}_3$ )  $\delta$  30.0, 29.2. HRMS–ESI ( $m/z$ ):  $[\text{M}+\text{NH}_4]^+$  calcd for  $\text{C}_{39}\text{H}_{68}\text{N}_6\text{O}_{14}\text{PSi}$ , 903.4295; found, 903.4296.

### *tert*-Alkylphosphonate **3ai**

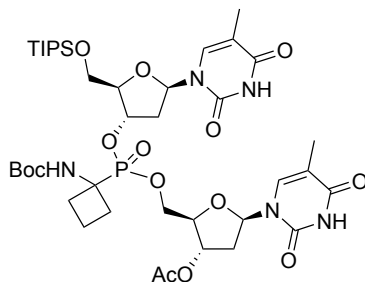

The product **3ai** was purified by flash chromatography on silica gel (80:20:0–50:45:5, hexane/EtOAc/MeOH) (Figure 2; 41.8 mg, 0.047 mmol, 93% isolated yield). The ratio (crude 1.2:1 → isolated 1.1:1) of diastereomers was determined by  $^{31}\text{P}$ -NMR analysis. Off-white amorphous solid.  $^1\text{H}$  NMR (400 MHz,  $\text{CDCl}_3$ )  $\delta$  8.47–8.37 (m, 2H), 7.62 (s, 0.48H), 7.46–7.35 (m, 1.52H), 6.38–6.25

(m, 2H), 5.26–5.21 (m, 2H), 5.10 (s, 0.52H), 4.92 (s, 0.48H), 4.39–4.18 (m, 4H), 4.05–3.93 (m, 2H), 2.63–2.10 (m, 13H), 1.96–1.91 (m, 6H), 1.42 (s, 9H), 1.19–1.08 (m, 21H).  $^{13}\text{C}$  NMR (100.6 MHz,  $\text{CDCl}_3$ )  $\delta$  170.4, 170.3, 163.7, 163.7, 163.6, 153.9, 153.8, 150.5, 150.4, 150.3, 135.4, 135.2, 134.9, 111.7, 111.6, 111.2, 111.2, 86.6, 85.9, 85.9, 85.2, 84.8, 84.4, 84.4, 82.9, 82.9, 82.8, 82.8, 80.0, 80.0, 78.5, 78.4, 78.3, 73.9, 66.0, 65.9, 65.4, 65.3, 63.5, 63.4, 54.2, 54.1, 52.7, 52.5, 39.8, 39.4, 39.4, 37.0, 36.7, 29.9, 29.7, 29.4, 28.3, 28.3, 20.9, 18.0, 16.4, 12.5, 12.3, 11.8 (only observed peaks).  $^{31}\text{P}$  NMR (162 MHz,  $\text{CDCl}_3$ )  $\delta$  27.5, 26.7. HRMS–ESI ( $m/z$ ):  $[\text{M}+\text{NH}_4]^+$  calcd for  $\text{C}_{40}\text{H}_{68}\text{N}_6\text{O}_{14}\text{PSi}$ , 915.4295; found, 915.4298.

### *tert*-Alkylphosphonate **3aj**

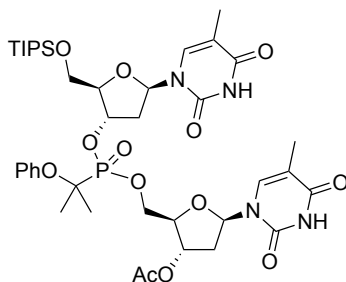

The product **3aj** was purified by flash chromatography on silica gel (80:20:0–50:45:5, hexane/EtOAc/MeOH) (Figure 2; 23.7 mg, 0.028 mmol, 55% isolated yield). The ratio (crude 1.2:1  $\rightarrow$  isolated 1.2:1) of diastereomers was determined by  $^{31}\text{P}$ -NMR analysis. White amorphous solid.  $^1\text{H}$  NMR (400 MHz,  $\text{CDCl}_3$ )  $\delta$  8.58–8.33 (m, 2H), 7.58 (m, 0.45H), 7.44 (m, 1H), 7.38 (m, 0.55H), 7.31–7.27 (m, 2H), 7.17–7.05 (m, 3H), 6.41–6.29 (m, 2H), 5.36–5.29 (m, 2H), 4.52–4.31 (m, 3H), 4.22 (s, 1H), 4.05–3.81 (m, 2H), 2.59 (m, 1H), 2.44 (m, 1H), 2.25–2.10 (m, 5H), 1.94–1.90 (m, 6H), 1.58–1.44 (m, 6H), 1.14–1.01 (m, 21H).  $^{13}\text{C}$  NMR (100.6 MHz,  $\text{CDCl}_3$ )  $\delta$  170.5, 170.4, 163.4, 163.3, 153.1, 153.0, 153.0, 152.9, 150.2, 150.2, 135.2, 134.8, 134.8, 129.2, 124.9, 124.2, 111.8, 111.7, 111.3, 111.2, 86.7, 86.7, 86.0, 86.0, 84.8, 84.7, 84.5, 84.3, 83.0, 82.9, 82.8, 82.7, 79.7, 79.6, 78.8, 78.8, 78.7, 78.0, 77.8, 74.0, 73.9, 66.2, 66.1, 65.7, 65.6, 63.5, 63.4, 40.0, 39.5, 39.4, 37.2, 37.0, 29.7, 29.6, 23.8, 23.8, 23.3, 23.3, 22.6, 22.6, 22.2, 22.2, 20.9, 20.8, 18.0, 17.9, 12.4, 12.3, 11.8, 11.7 (only observed peaks).  $^{31}\text{P}$  NMR (162 MHz,  $\text{CDCl}_3$ )  $\delta$  25.9, 25.3. HRMS–ESI ( $m/z$ ):  $[\text{M}+\text{H}]^+$  calcd for  $\text{C}_{40}\text{H}_{60}\text{N}_4\text{O}_{13}\text{PSi}$ , 863.3658; found, 863.3659.

## 7. X-ray Structure of (*R<sub>P</sub>*)-**3aa**

Details of the crystal data and a summary of the intensity data collection parameters for (*R<sub>P</sub>*)-**3aa** are listed in Table S1. A suitable crystal obtained by recrystallization from acetonitrile and water was mounted with mineral oil on a MiTeGen MicroMounts and transferred to the goniometer of the kappa goniometer of a RIGAKU XtaLAB Synergy-S system with 1.2 kW MicroMax-007HF microfocus rotating anode (Graphite-monochromated Mo K $\alpha$  radiation ( $\lambda = 0.71073$  Å)) and HyPix-6000HE hybrid photon-counting detector. Cell parameters were determined and refined, and raw frame data were integrated using CrysAlis<sup>Pro</sup> (Agilent Technologies, 2010) and a multi-scan absorption correction using SCALE3 ABSPACK was applied. The structures were solved by direct methods with SHELXT<sup>11</sup> and refined by full-matrix least-squares techniques against  $F^2$  (SHELXL-2018/3)<sup>12</sup> by using Olex2 software package.<sup>13</sup> The intensities were corrected for Lorentz and polarization effects. All non-hydrogen atoms were refined with anisotropic displacement parameters. The hydrogen atoms were refined isotropically on calculated positions using a riding model with their  $U_{\text{iso}}$  values constrained to 1.5 times the  $U_{\text{eq}}$  of their pivot atoms for terminal  $\text{sp}^3$  carbon atoms and 1.2 times for all other carbon atoms. Crystallographic data for the structures reported in this paper have been deposited with the Cambridge Crystallographic Data Centre. CCDC 2263561 contains the supplementary crystallographic data for this paper. These data can be obtained free of charge from The Cambridge Crystallographic Data Centre via [www.ccdc.cam.ac.uk/data\\_request/cif](http://www.ccdc.cam.ac.uk/data_request/cif).

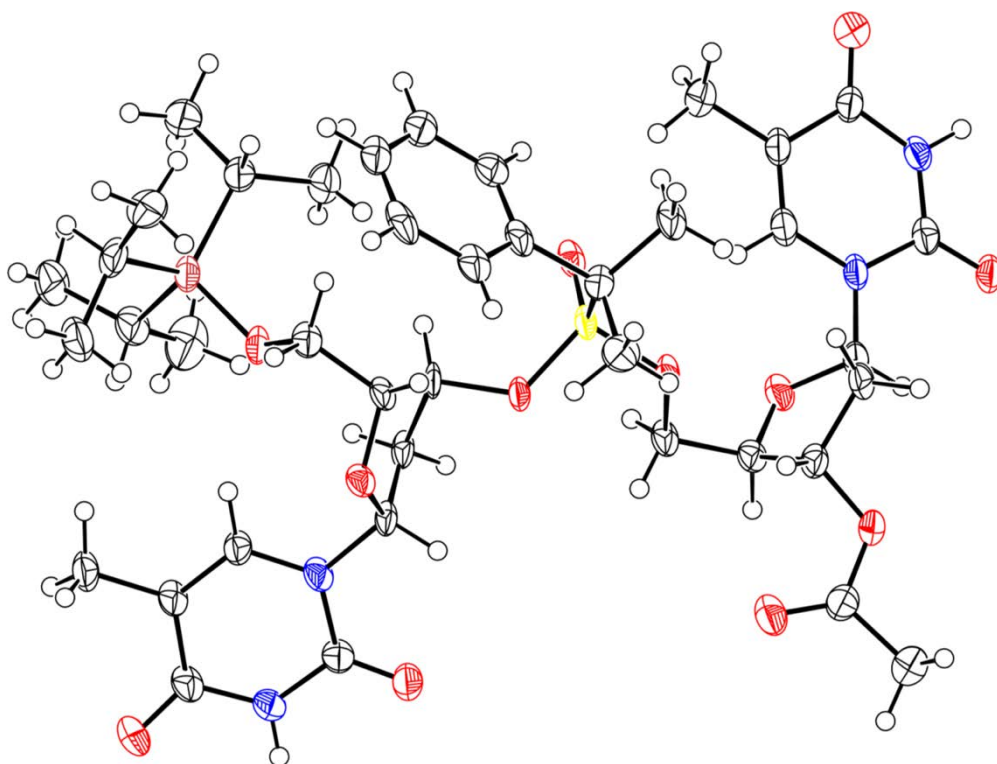

**Table S1.** Crystallographic data and structure refinement details of (*R<sub>p</sub>*)-**3aa**

|                                                                                      | ( <i>R<sub>p</sub></i> )- <b>3aa</b>                               |
|--------------------------------------------------------------------------------------|--------------------------------------------------------------------|
| CCDC No.                                                                             | 2263561                                                            |
| formula                                                                              | C <sub>40</sub> H <sub>59</sub> N <sub>4</sub> O <sub>12</sub> PSi |
| fw                                                                                   | 846.97                                                             |
| <i>T</i> (K)                                                                         | 123(2)                                                             |
| $\lambda$ (Å)                                                                        | 0.71073                                                            |
| cryst syst                                                                           | orthorhombic                                                       |
| space group                                                                          | <i>P</i> 2 <sub>1</sub> 2 <sub>1</sub> 2 <sub>1</sub>              |
| <i>a</i> (Å)                                                                         | 9.8268(2)                                                          |
| <i>b</i> (Å)                                                                         | 13.5743(4)                                                         |
| <i>c</i> (Å)                                                                         | 32.2626(14)                                                        |
| $\alpha$ (deg)                                                                       | 90                                                                 |
| $\beta$ (deg)                                                                        | 90                                                                 |
| $\gamma$ (deg)                                                                       | 90                                                                 |
| <i>V</i> (Å <sup>3</sup> )                                                           | 4303.6(2)                                                          |
| <i>Z</i>                                                                             | 4                                                                  |
| <i>D</i> <sub>calc</sub> (g·cm <sup>-3</sup> )                                       | 1.307                                                              |
| $\mu$ (mm <sup>-1</sup> )                                                            | 0.157                                                              |
| F(000)                                                                               | 1808                                                               |
| cryst size (mm <sup>3</sup> )                                                        | 0.2 × 0.04 × 0.01                                                  |
| 2 $\theta$ range (deg)                                                               | 5.12 to 54.97                                                      |
| reflns collected                                                                     | 22102                                                              |
| indep reflns/ <i>R</i> <sub>int</sub>                                                | 9462 / 0.0632                                                      |
| params                                                                               | 534                                                                |
| GOF on <i>F</i> <sup>2</sup>                                                         | 1.050                                                              |
| <i>R</i> <sub>1</sub> , <i>wR</i> <sub>2</sub> [ <i>I</i> > 2 $\sigma$ ( <i>I</i> )] | 0.0692, 0.1709                                                     |
| <i>R</i> <sub>1</sub> , <i>wR</i> <sub>2</sub> (all data)                            | 0.0909, 0.1798                                                     |
| Flack parameter                                                                      | -0.11(8)                                                           |

## 8. Derivatization of *tert*-Alkylphosphonates to the Phosphoramidites

### Procedure for synthesis of (*S<sub>P</sub>*)-**3aa-3** and (*R<sub>P</sub>*)-**3aa-3**

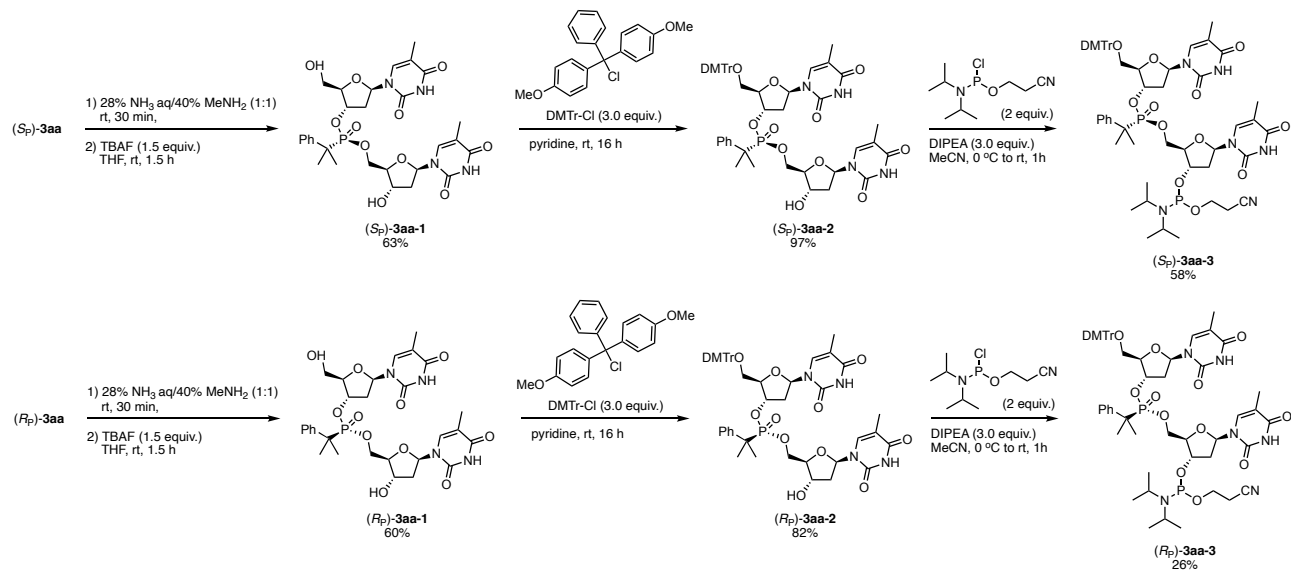

**Supplementary Fig. 3.** Derivatization of *tert*-alkylphosphonates to the phosphoramidites

**Deprotection.** (*S<sub>P</sub>*)-**3aa** (250 mg, 0.30 mmol) was dissolved in ammonia solution (28%  $\text{NH}_3$  aq.: 40%  $\text{MeNH}_2$  aq. = 1:1). Stirred for 30 min, the reaction mixture was evaporated to remove solvents and reactants. The residue was used for the desilylation without further purification. The residue was dissolved in THF (0.7 mL) and the THF solution of tetrabutylammonium fluoride (0.44 mL, 0.44 mmol) was added to the solution. The reaction mixture was stirred for 90 min and then was evaporated. The crude mixture was purified by silica-gel column chromatography (silica gel, hexane/EtOAc = 50:50 to EtOAc only, then EtOAc/MeOH = 100:0 to 90:10) to obtain (*S<sub>P</sub>*)-**3aa-1** (120 mg, 0.19 mmol, 63%). (*R<sub>P</sub>*)-**3aa-1** was synthesized using the same protocol (46 mg, 0.07 mmol, 60% from 0.12 mmol scale synthesis).

**DMTr protection.** To a solution of (*S<sub>P</sub>*)-**3aa-1** (120 mg, 0.19 mmol) in dry pyridine (2.0 mL) was added 4,4'-{chloro(phenyl)methylene}bis(methoxybenzene) (190 mg, 0.56 mmol) at room temperature. After stirring for 16 hours under a dry atmosphere, the reaction was quenched with MeOH (1 mL) and then the solvent was evaporated. The crude product was purified by column chromatography (silica gel, hexane/EtOAc = 20:80 to EtOAc only, then EtOAc/MeOH = 100:0 to 90:10) to give (*S<sub>P</sub>*)-**3aa-2** (170 mg, 0.18 mmol, 97 %) as amorphous solid. (*R<sub>P</sub>*)-**3aa-2** was synthesized using the same protocol (42 mg, 0.044 mmol, 82% from 0.05 mmol scale synthesis).

**Phosphoramidation.** To a solution of (*S<sub>P</sub>*)-**3aa-2** (160 mg, 0.17 mmol) in dry MeCN (4.0 mL) was added DIPEA (0.10 mL, 0.59 mmol) and 3-[(chloro(diisopropylamino)phosphaneyl)oxy]propanenitrile (0.094 mL, 0.34 mmol) at 0 °C. Cooling bath was removed and the mixture was allowed to be stirred at room temperature under dry nitrogen for 1 h. The reaction mixture was washed with hexane (5 mL). The resulting oil was purified by column chromatography (silica gel, pre-wetted with hexane/EtOAc/triethylamine = 25:74:1, eluted with hexane/EtOAc = 25:75 to EtOAc only) to give (*S<sub>P</sub>*)-**3aa-3** (110 mg, 0.098 mmol, 58%) as a

colorless amorphous solid. (*R<sub>P</sub>*)-**3aa-3** was synthesized using the same protocol, but the further purification with column chromatography (silica gel, pre-wetted with hexane/EtOAc/triethylamine = 25:74:1, eluted with hexane/EtOAc = 25:75 to EtOAc only) was required to result in lower yield. (12 mg, 0.04 mmol, 26% from 0.04 mmol scale synthesis).

## 9. Characterization Data for Phosphoramidites

### (*S<sub>P</sub>*)-**3aa-1**

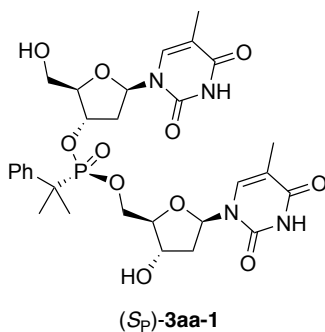

Colorless amorphous solid. The sample contains inseparable impurities. <sup>1</sup>H NMR (400 MHz, CD<sub>3</sub>OD) δ 7.76 (m, 1H), 7.58–7.56 (m, 2H), 7.37–7.34 (m, 3H), 7.25 (m, 1H), 6.23–6.17 (m, 2H), 4.86 (m, 1H), 4.28 (m, 1H), 4.18–4.05 (m, 3H), 3.99 (m, 1H), 3.69–3.68 (m, 2H), 2.22 (m, 1H), 2.11–2.04 (m, 3H), 1.89–1.85 (m, 6H), 1.70–1.65 (m, 6H). <sup>13</sup>C NMR (100.6 MHz, CD<sub>3</sub>OD) δ 166.3, 166.3, 152.3, 152.2, 141.5 (d, *J<sub>C-P</sub>* = 5.1 Hz), 137.8, 137.5, 129.5 (×2C) (d, *J<sub>C-P</sub>* = 2.8 Hz), 128.9 (×2C) (d, *J<sub>C-P</sub>* = 5.4 Hz), 128.4 (d, *J<sub>C-P</sub>* = 2.8 Hz), 111.9, 111.8, 87.4 (d, *J<sub>C-P</sub>* = 3.5 Hz), 86.5, 86.2 (d, *J<sub>C-P</sub>* = 6.5 Hz), 85.9, 79.1 (d, *J<sub>C-P</sub>* = 7.6 Hz), 71.8, 67.3 (d, *J<sub>C-P</sub>* = 7.8 Hz), 62.4, 40.4 (d, *J<sub>C-P</sub>* = 135.8 Hz), 40.4, 39.3 (d, *J<sub>C-P</sub>* = 4.6 Hz), 24.4 (d, *J<sub>C-P</sub>* = 3.8 Hz), 24.1 (d, *J<sub>C-P</sub>* = 4.1 Hz), 12.7, 12.4. <sup>31</sup>P NMR (162 MHz, CD<sub>3</sub>OD) δ 33.7. HRMS–ESI (*m/z*): [M+H]<sup>+</sup> calcd for C<sub>29</sub>H<sub>38</sub>N<sub>4</sub>O<sub>11</sub>P, 649.2269; found, 649.2288.

### (*S<sub>P</sub>*)-**3aa-2**

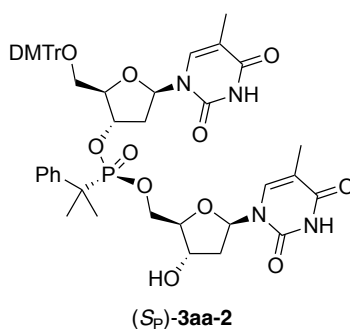

Colorless amorphous solid. <sup>1</sup>H NMR (400 MHz, CDCl<sub>3</sub>) δ 9.09–8.98 (m, 2H), 7.58–7.56 (m, 2H), 7.39–7.19 (m, 13H), 7.08 (s, 1H), 6.84–6.82 (m, 4H), 6.30 (m, 1H), 6.13 (m, 1H), 4.81 (m, 1H), 4.19 (m, 1H), 4.12 (m, 1H), 3.99 (m, 1H), 3.85–3.78 (m, 8H), 3.42–3.34 (m, 3H), 2.28 (s, 1H), 2.10–2.08 (m, 2H), 1.95–1.89 (m, 4H), 1.69–1.65 (m, 6H), 1.38 (s, 3H). <sup>13</sup>C NMR (100.6 MHz, CDCl<sub>3</sub>) δ 163.6, 158.7, 158.7, 150.4, 150.1, 144.1, 139.9, 139.9, 135.3, 135.2, 135.1, 135.0, 130.1, 128.5, 128.5, 128.1, 128.0, 127.7, 127.7, 127.6, 127.5, 127.2, 113.3, 111.6, 111.1, 87.1, 85.0, 85.0, 84.8, 84.6, 84.2, 77.8, 77.7, 77.2, 70.5, 64.8, 63.1, 55.3, 40.0, 39.6, 38.7, 38.7, 38.7, 24.0, 24.0, 23.7, 23.7, 12.6, 11.6 (only

observed peaks).  $^{31}\text{P}$  NMR (162 MHz,  $\text{CDCl}_3$ )  $\delta$  34.7. HRMS-ESI ( $m/z$ ):  $[\text{M}+\text{NH}_4]^+$  calcd for  $\text{C}_{50}\text{H}_{59}\text{N}_5\text{O}_{13}\text{P}$ , 968.3842; found, 968.3840.

### (*S*<sub>P</sub>)-3aa-3

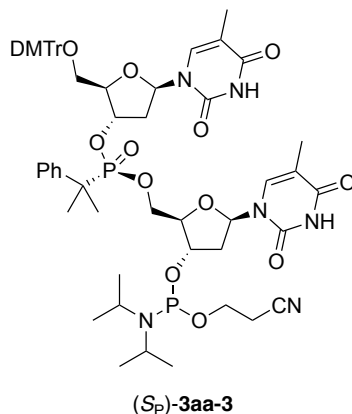

Colorless amorphous solid.  $^1\text{H}$  NMR (400 MHz,  $\text{CDCl}_3$ )  $\delta$  8.45 (brs, 2H), 7.58–7.56 (m, 2H), 7.39–7.11 (m, 14H), 6.83–6.81 (m, 4H), 6.29 (m, 1H), 6.19 (m, 1H), 4.82 (m, 1H), 4.36 (m, 1H), 4.11–4.03 (m, 3H), 3.93–3.57 (m, 11H), 3.35–3.30 (m, 2H), 2.65–2.60 (m, 2H), 2.38 (m, 1H), 2.07–2.00 (m, 2H), 1.92–1.80 (m, 4H), 1.70–1.65 (m, 6H), 1.34–1.17 (m, 15H).  $^{13}\text{C}$  NMR (100.6 MHz,  $\text{CDCl}_3$ )  $\delta$  163.4, 163.3, 158.7, 158.7, 150.1, 150.0, 149.9, 144.1, 144.0, 140.2, 140.1, 140.1, 140.1, 135.2, 135.2, 135.1, 135.1, 134.9, 134.9, 130.1, 128.5, 128.1, 128.0, 127.7, 127.6, 127.5, 127.4, 127.2, 117.6, 113.3, 111.5, 111.3, 111.2, 87.1, 85.2, 85.0, 84.9, 84.3, 84.0, 83.9, 77.9, 77.9, 77.2, 73.2, 73.0, 72.9, 72.7, 64.6, 64.5, 64.5, 63.1, 63.1, 58.2, 58.1, 58.0, 57.9, 55.3, 43.4, 43.3, 40.0, 39.3, 39.2, 38.8, 38.7, 30.9, 24.6, 24.5, 24.5, 24.2, 24.2, 23.7, 23.6, 23.5, 23.5, 20.5, 20.4, 20.3, 20.3, 12.6, 12.5, 11.5 (only observed peaks).  $^{31}\text{P}$  NMR (162 MHz,  $\text{CDCl}_3$ )  $\delta$  149.3, 149.1, 34.4, 34.4. HRMS-ESI ( $m/z$ ):  $[\text{M}+\text{NH}_4]^+$  calcd for  $\text{C}_{59}\text{H}_{76}\text{N}_7\text{O}_{14}\text{P}_2$ , 1168.4920; found, 1168.4934.

### (*R*<sub>P</sub>)-3aa-1

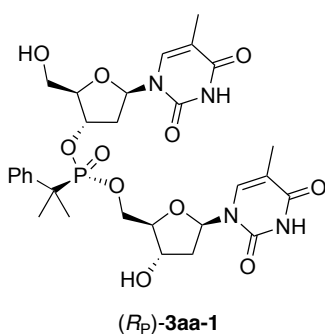

Colorless amorphous solid. The sample contains inseparable impurities.  $^1\text{H}$  NMR (400 MHz,  $\text{CD}_3\text{OD}$ )  $\delta$  7.74 (m, 1H), 7.58–7.56 (m, 2H), 7.49 (m, 1H), 7.37–7.35 (m, 2H), 7.28 (m, 1H), 6.24–6.19 (m, 2H), 4.85 (m, 1H), 4.26 (m, 1H), 4.13 (m, 1H), 4.04 (m, 1H), 3.96 (m, 1H), 3.82 (m, 1H), 3.58 (m, 1H), 3.43 (m, 1H), 2.38 (m, 1H), 2.23–2.10 (m, 3H), 1.88–1.84 (m, 6H), 1.69–1.65 (m, 6H).  $^{13}\text{C}$  NMR (100.6 MHz,  $\text{CDCl}_3$ )  $\delta$  166.3, 166.3, 152.3, 152.2, 141.6 (d,  $J_{\text{C-P}} = 5.1$  Hz), 137.7 ( $\times 2\text{C}$ ), 129.4 ( $\times 2\text{C}$ ) (d,  $J_{\text{C-P}} = 2.7$  Hz), 128.9 ( $\times 2\text{C}$ ) (d,  $J_{\text{C-P}} = 5.4$  Hz), 128.4 (d,  $J_{\text{C-P}} = 3.0$  Hz), 111.9, 111.9, 87.1 (d,  $J_{\text{C-P}} = 6.0$  Hz), 86.5, 86.2 (d,  $J_{\text{C-P}} = 5.2$  Hz), 86.0, 79.4 (d,  $J_{\text{C-P}} = 7.6$  Hz), 71.6, 68.0 (d,  $J_{\text{C-P}} = 7.8$  Hz), 62.5, 40.5 (d,  $J_{\text{C-P}} = 136.0$  Hz), 40.5, 40.2 (d,  $J_{\text{C-P}} = 2.1$  Hz), 24.4 (d,  $J_{\text{C-P}} = 3.7$  Hz), 24.1



(d,  $J_{C-P} = 3.9$  Hz), 12.5, 12.5.  $^{31}\text{P}$  NMR (162 MHz,  $\text{CD}_3\text{OD}$ )  $\delta$  33.3. HRMS-ESI ( $m/z$ ):  $[\text{M}+\text{H}]^+$  calcd for  $\text{C}_{29}\text{H}_{38}\text{N}_4\text{O}_{11}\text{P}$ , 649.2269; found, 649.2286.

### (*R*<sub>P</sub>)-3aa-2

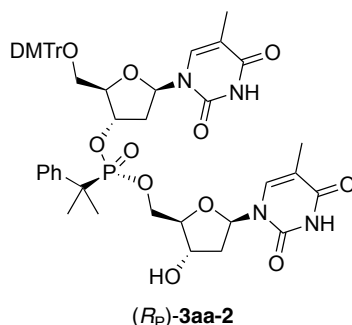

Pale yellow amorphous solid.  $^1\text{H}$  NMR (400 MHz,  $\text{CDCl}_3$ )  $\delta$  9.62 (brs, 1H), 9.21 (brs, 1H), 7.52–7.45 (m, 3H), 7.30–7.16 (m, 12H), 7.06 (m, 1H), 6.85–6.83 (m, 4H), 6.34 (m, 1H), 6.21 (m, 1H), 4.66 (m, 1H), 4.44 (m, 1H), 4.25 (m, 1H), 4.12–3.99 (m, 3H), 3.81–3.79 (m, 7H), 3.26 (m, 1H), 2.78 (m, 1H), 2.54 (m, 1H), 2.44–2.29 (m, 2H), 2.08 (m, 1H), 1.93 (s, 3H), 1.64–1.57 (m, 6H), 1.29 (s, 3H).  $^{13}\text{C}$  NMR (100.6 MHz,  $\text{CDCl}_3$ )  $\delta$  163.7, 163.5, 163.5, 158.8, 158.8, 151.1, 150.3, 143.8, 140.0, 139.9, 135.6, 135.1, 135.0, 134.9, 130.1, 128.3, 128.3, 128.2, 128.0, 127.5, 127.4, 127.4, 127.3, 127.3, 113.3, 112.2, 111.1, 87.3, 85.3, 84.8, 84.7, 84.4, 84.3, 84.3, 79.7, 79.7, 77.2, 70.8, 65.4, 65.3, 63.3, 55.3, 40.3, 40.2, 39.0, 24.4, 24.4, 23.4, 23.4, 12.5, 11.5 (only observed peaks).  $^{31}\text{P}$  NMR (162 MHz,  $\text{CDCl}_3$ )  $\delta$  34.0. HRMS-ESI ( $m/z$ ):  $[\text{M}+\text{NH}_4]^+$  calcd for  $\text{C}_{50}\text{H}_{59}\text{N}_5\text{O}_{13}\text{P}$ , 968.3842; found, 968.3841.

### (*R*<sub>P</sub>)-3aa-3

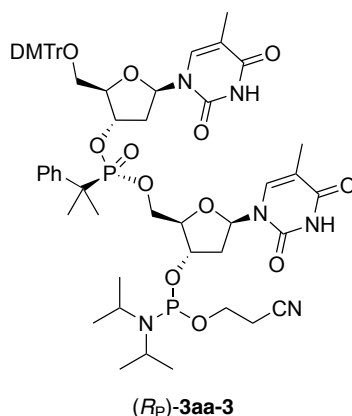

Colorless amorphous solid.  $^1\text{H}$  NMR (400 MHz,  $\text{CDCl}_3$ )  $\delta$  8.44–8.40 (m, 2H), 7.48–7.10 (m, 16H), 6.85–6.82 (m, 4H), 6.36 (m, 1H), 6.19 (m, 1H), 4.90 (m, 1H), 4.45 (m, 1H), 4.21–4.06 (m, 3H), 3.86–3.59 (m, 11H), 3.26 (m, 1H), 2.87 (m, 1H), 2.65–2.62 (m, 2H), 2.51–2.34 (m, 3H), 2.01–1.88 (m, 4H), 1.62–1.56 (m, 6H), 1.30–1.18 (m, 15H).  $^{13}\text{C}$  NMR (100.6 MHz,  $\text{CDCl}_3$ )  $\delta$  163.5, 163.3, 158.8, 150.2, 150.2, 150.0, 143.9, 140.3, 140.2, 136.0, 135.8, 135.3, 135.3, 135.1, 134.9, 130.1, 128.3, 128.3, 128.2, 128.0, 127.6, 127.5, 127.5, 127.5, 127.3, 117.8, 113.1, 111.6, 111.2, 111.1, 87.2, 85.7, 84.5, 84.4, 84.2, 78.7, 78.6, 78.4, 77.2, 73.2, 65.5, 63.3, 58.1, 57.9, 55.3, 43.4, 43.4, 43.3, 43.2, 40.2, 40.2, 39.8, 39.4, 39.4, 39.1, 38.8, 38.8, 24.6, 24.5, 24.5, 24.4, 23.6, 20.5, 20.4, 20.4, 20.4, 12.3, 11.5, 11.4 (only observed peaks).  $^{31}\text{P}$  NMR (162 MHz,  $\text{CDCl}_3$ )  $\delta$  149.3, 148.9, 33.4, 33.3. HRMS-ESI ( $m/z$ ):  $[\text{M}+\text{NH}_4]^+$  calcd for  $\text{C}_{59}\text{H}_{76}\text{N}_7\text{O}_{14}\text{P}_2$ , 1168.4920; found, 1168.4943.

## 10. Procedure for Automated Solid-Support Synthesis of Oligonucleotides

The automated solid-support synthesis of oligonucleotides were performed on nS8-II (GeneDesign). The detailed protocol for nS8-II was given in the table below. All the oligonucleotides were synthesized using low-loaded Unylinker™ universal solid support (0.5  $\mu\text{mol}$ , 42.6  $\mu\text{mol/g}$ , ChemGenes, N-4000-10). After the synthetic cycle, the solid support was dried with an argon gas flush and placed into a 2 mL microtube. 500  $\mu\text{L}$  of ammonia methyl amine (AMA) solution (28%  $\text{NH}_3$  aq./ 40%  $\text{MeNH}_2$  aq. = 1/1) was added to the tube and the support was treated for 30 minutes at 58 °C. The remaining ammonia and  $\text{MeNH}_2$  was evaporated and purified with the cartridge purification system (Glen-Pak™ DNA Purification Cartridge, #60-5200, according to the manual provided) to afford aqueous solution containing the purified oligonucleotide. UV absorbance of the solution was measured and then the sample was lyophilized to afford a white powder. Yield was calculated based on absorbance of 260 nm, in which the molar absorption coefficient of the oligonucleotides (**Oligo-1-8**) was calculated from the known 260 nm absorption coefficient of thymine in aqueous media.

### Synthesis cycle for oligonucleotides (0.5 $\mu\text{mol}$ scale)

| Step | Reaction      | Reagent                                                                                   | Volume (1CV = 500 $\mu\text{L}$ ) | Reaction time                                                                          |
|------|---------------|-------------------------------------------------------------------------------------------|-----------------------------------|----------------------------------------------------------------------------------------|
| 1    | Detritylation | Dichloroacetic Acid-Toluene (3:97)                                                        | 2 CV (incubation twice)           | 90 sec (60 + 30 seq)                                                                   |
| 2    | Coupling      | Activator solution: 0.1M Amidite solution = 40:60                                         | 12 eq.                            | 4 min for ( <b>R<sub>P</sub>/S<sub>P</sub></b> )- <b>3aa-3</b><br>1 min for dT amidite |
| 3    | Oxidation     | Iodine Solution (abt. 0.05mol/L)[Pyridine:Water(9:1)                                      | 1 CV (incubation)                 | 30 sec                                                                                 |
| 4    | Capping       | 1-Methylimidazole-Acetonitrile (2:8) + Acetic Anhydride-2,6-Lutidine-Acetonitrile (2:3:5) | 1 CV (incubation)                 | 90 sec                                                                                 |

Note: Before starting the coupling cycle, conduct deblocking of DMTr group on solid-support sufficiently in order to prevent generation of -Int oligomer byproduct. The dimer amidite (**R<sub>P</sub>/S<sub>P</sub>**)-**3aa-3** was dehydrated by azeotropic distillation and dried in vacuo with  $\text{P}_2\text{O}_5$  before use.

### UPLC-MS's LC charts and ESI-QTOF MS spectra of oligonucleotides

Analysis conditions with Waters UPLC MS systems

|                         |                                                                              |
|-------------------------|------------------------------------------------------------------------------|
| System                  | Waters, UPLC Xevo G2-XS QToF                                                 |
| column                  | ACQUITY UPLC OST C18 Column, 1.7 $\mu\text{m}$ , 2.1 x 50 mm                 |
| Buffer                  | A···240 mM HFIP, 7 mM TEA (5% MeOH)<br>B···240 mM HFIP, 7 mM TEA (100% MeOH) |
| Gradient                | 10 to 80 for 6min                                                            |
| Flow rate               | 0.2 ml/min                                                                   |
| Column oven temperature | 60 °C                                                                        |
| Detector                | UV 260 nm                                                                    |

# Oligo-1 (R<sub>p</sub>)-TTTTTTTTT<sub>Alk</sub>T

2: UV Detector: 260.003 Nm

5.846e-1  
Range: 6.916e-1

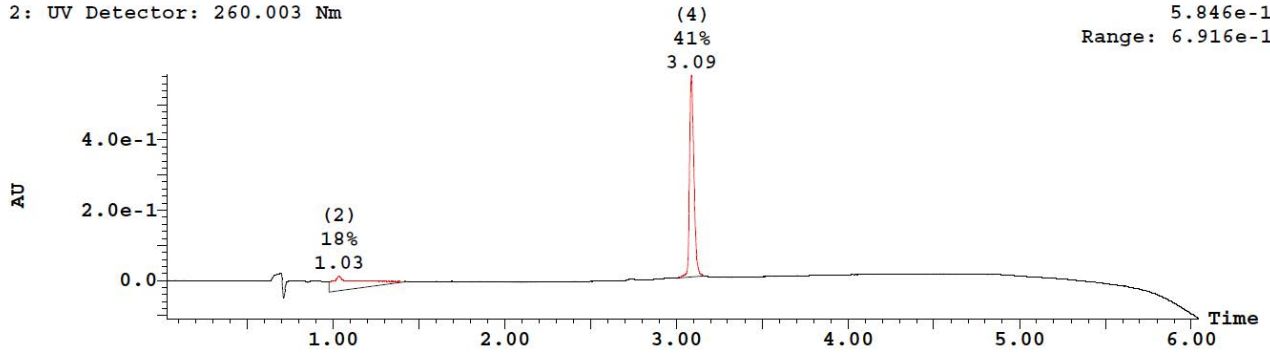

1: TOF MS ES- :TIC Smooth (Mn, 2x2)

1.7e+008

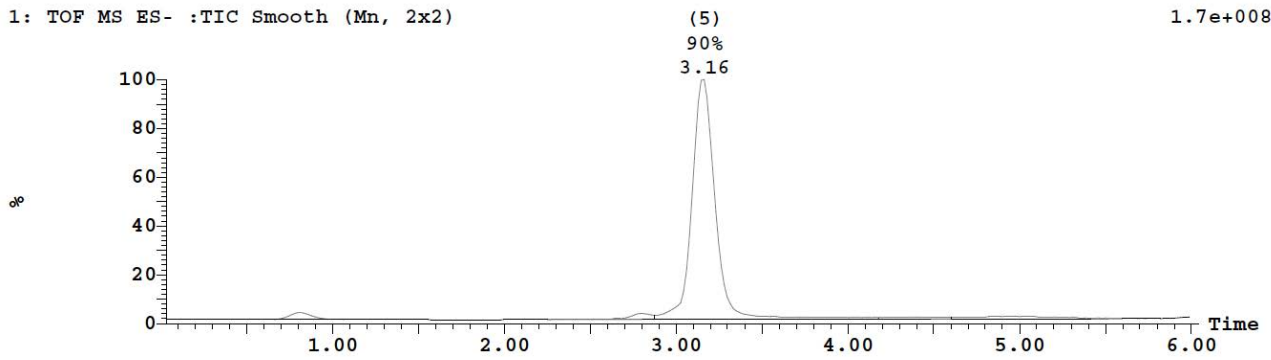

10-80

230308 D40906 photo DMB Rp 3end 185 (3.146) Cm (181:195)

1: TOF MS ES-  
8.89e7

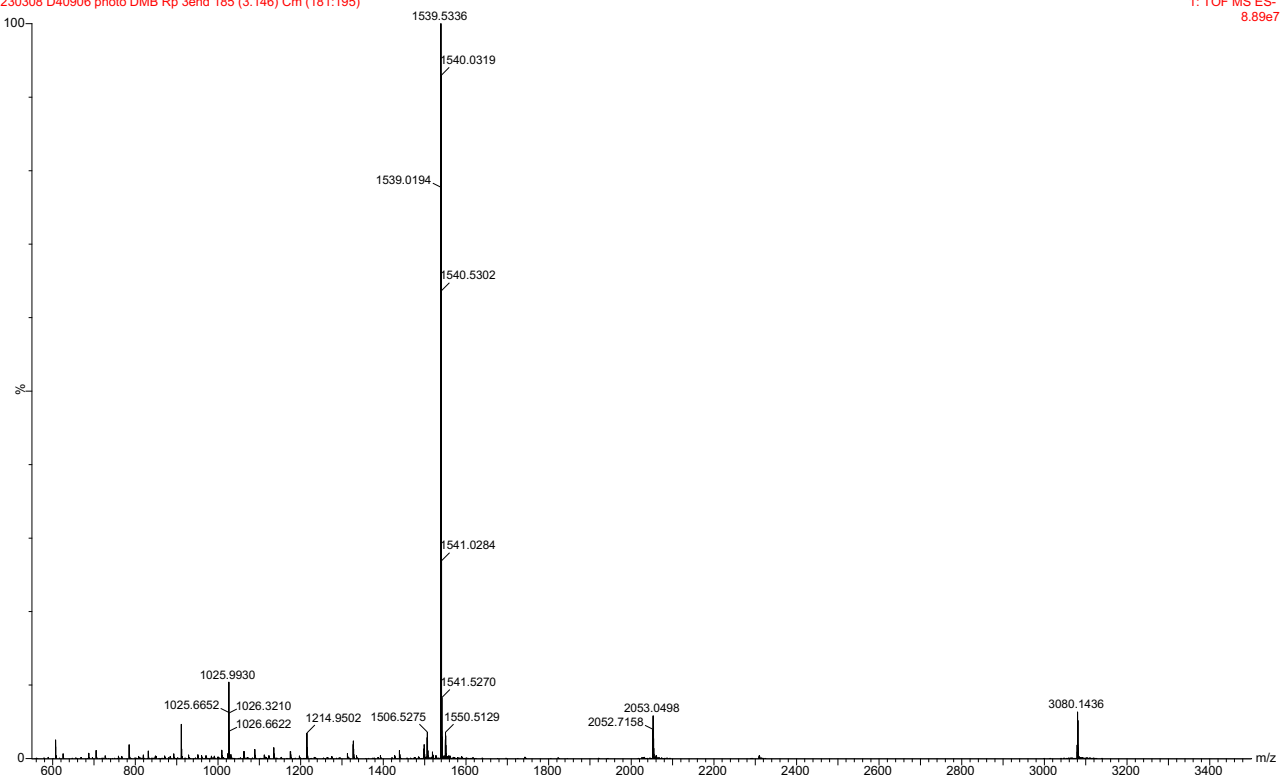

10-80

230308 D40906 photo DMB Rp 3end 185 (3.146) Cm (181:195)

1: TOF MS ES-  
8.89e7

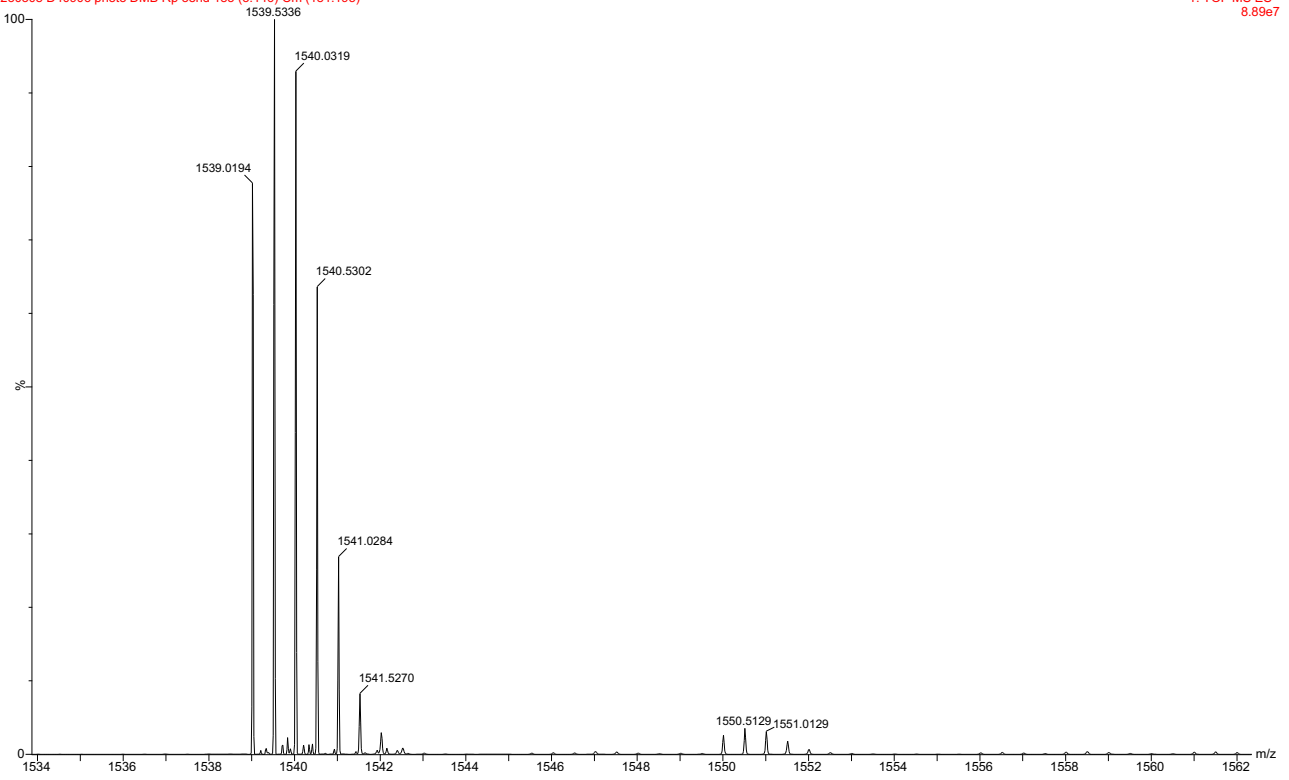

10-80

230308 D40906 photo DMB Rp 3end 185 (3.146) Cm (181:195)

1: TOF MS ES-  
5.62e6

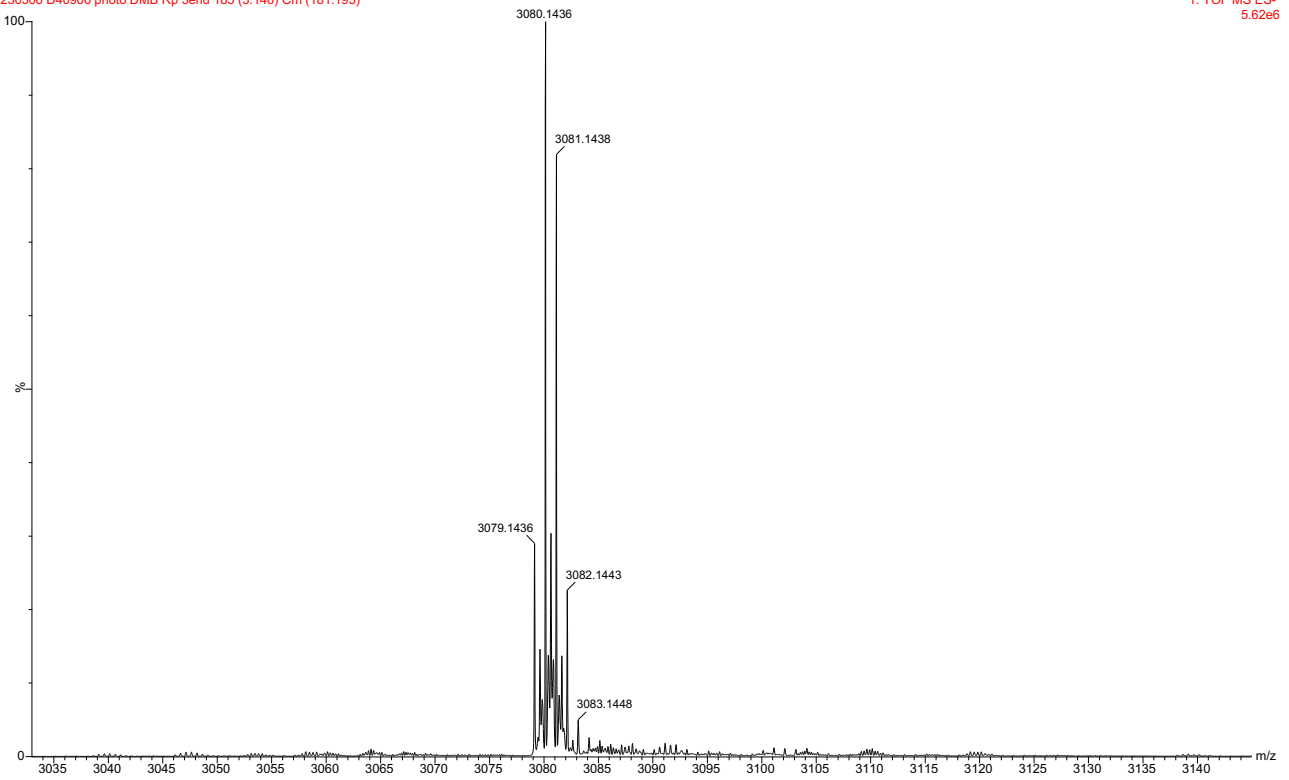

# Oligo-2 (S<sub>P</sub>)-TTTTTTTTT<sub>Alk</sub>T

2: UV Detector: 260.003 Nm

5.124e-1  
Range: 6.193e-1

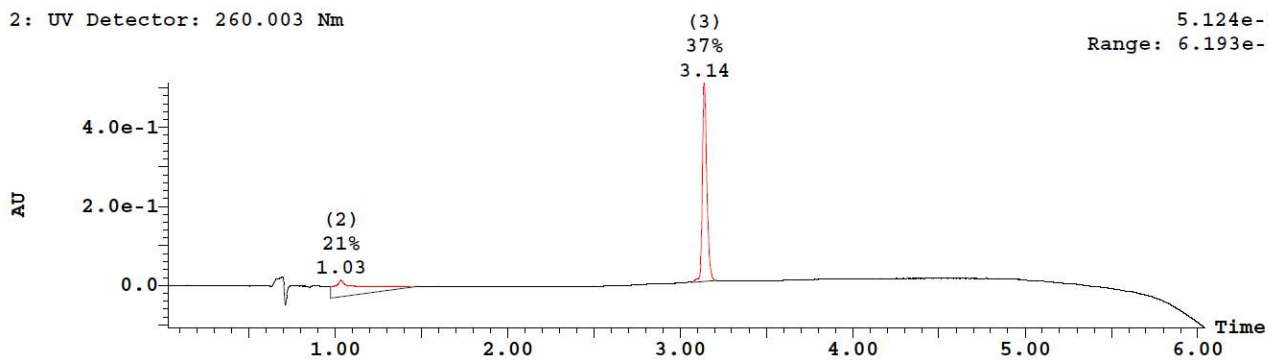

1: TOF MS ES- :TIC Smooth (Mn, 2x2)

1.6e+008

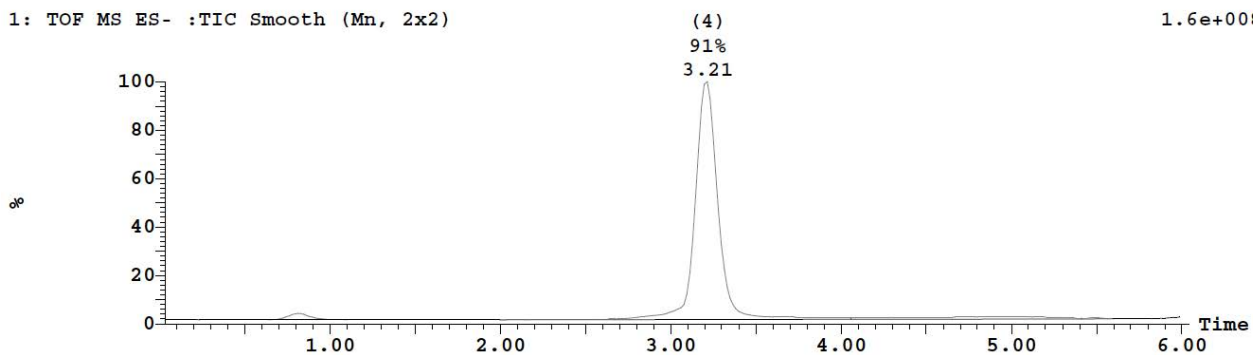

10-80

230308 D40906 photo DMB Sp 3end 188 (3.197) Cm (182:193)

1: TOF MS ES-  
7.59e7

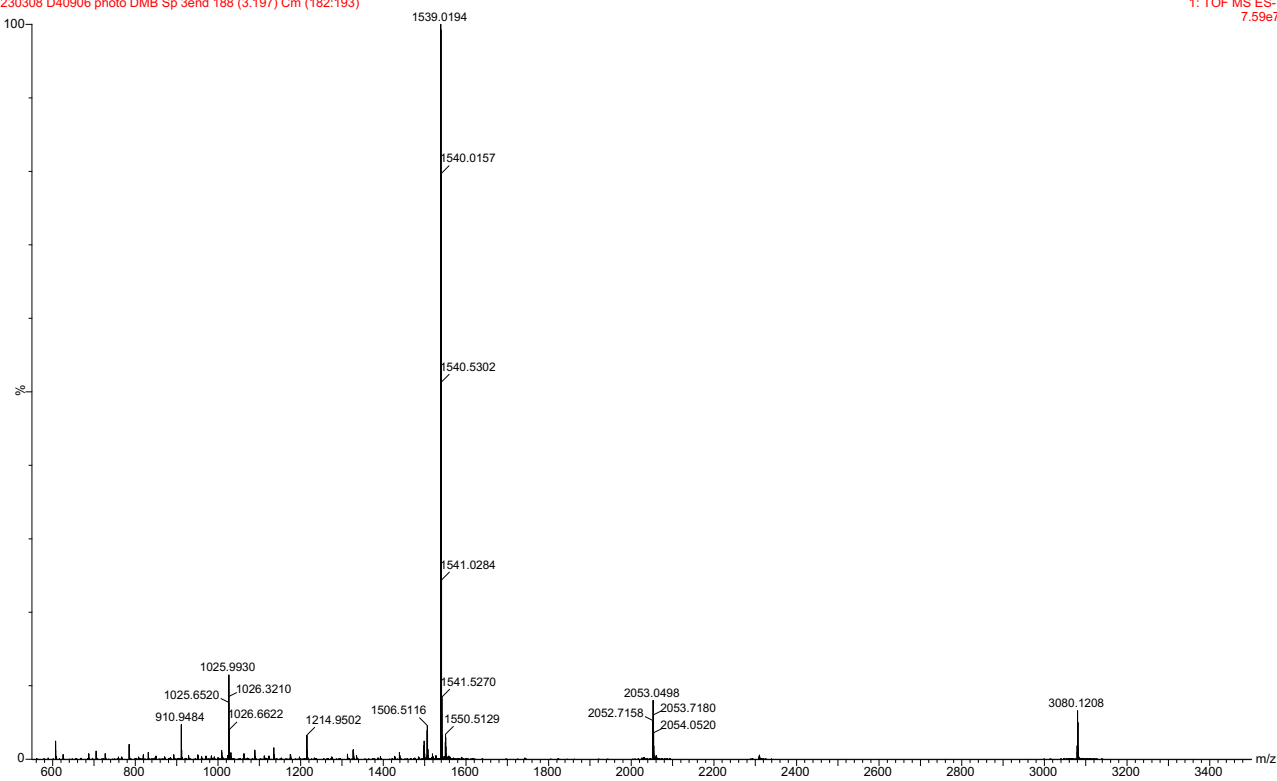

10-80

230308 D40906 photo DMB Sp 3end 188 (3.197) Cm (182:193)

1: TOF MS ES-  
7.59e7

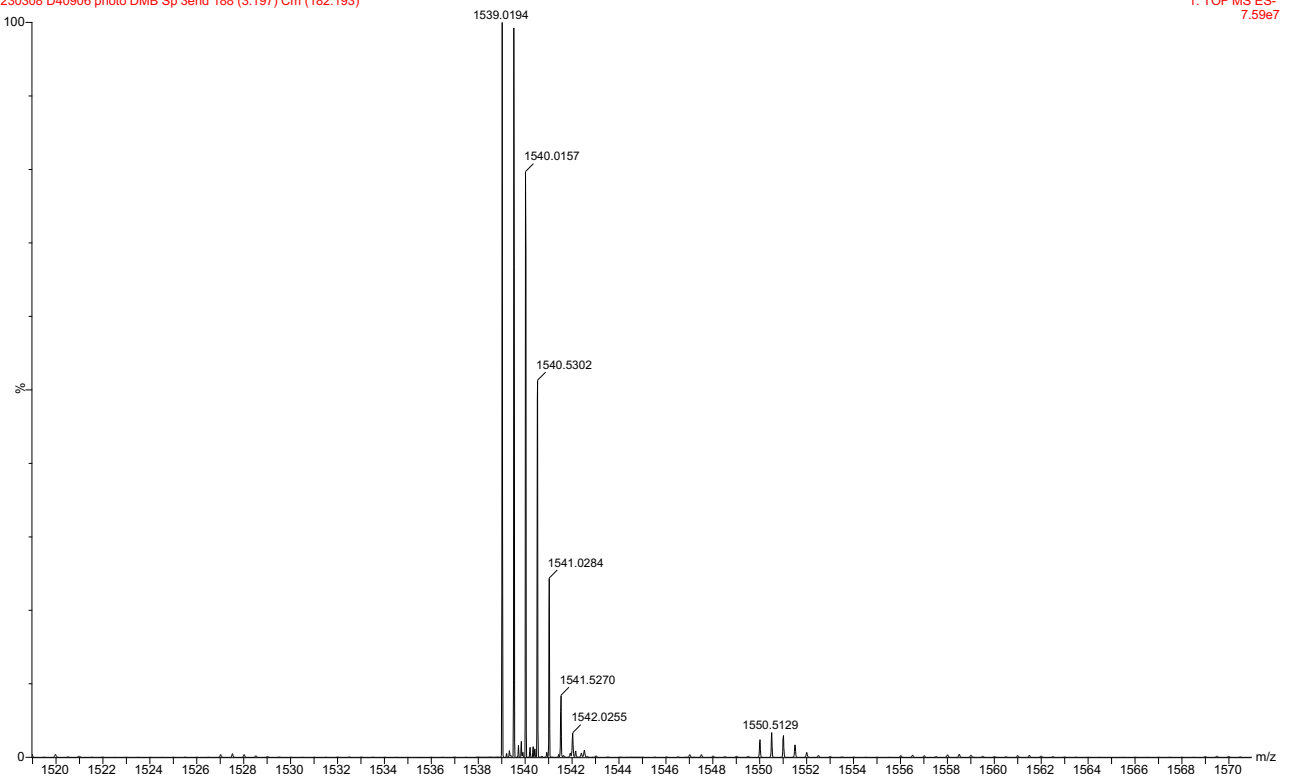

10-80

230308 D40906 photo DMB Sp 3end 188 (3.197) Cm (182:193)

1: TOF MS ES-  
5.01e6

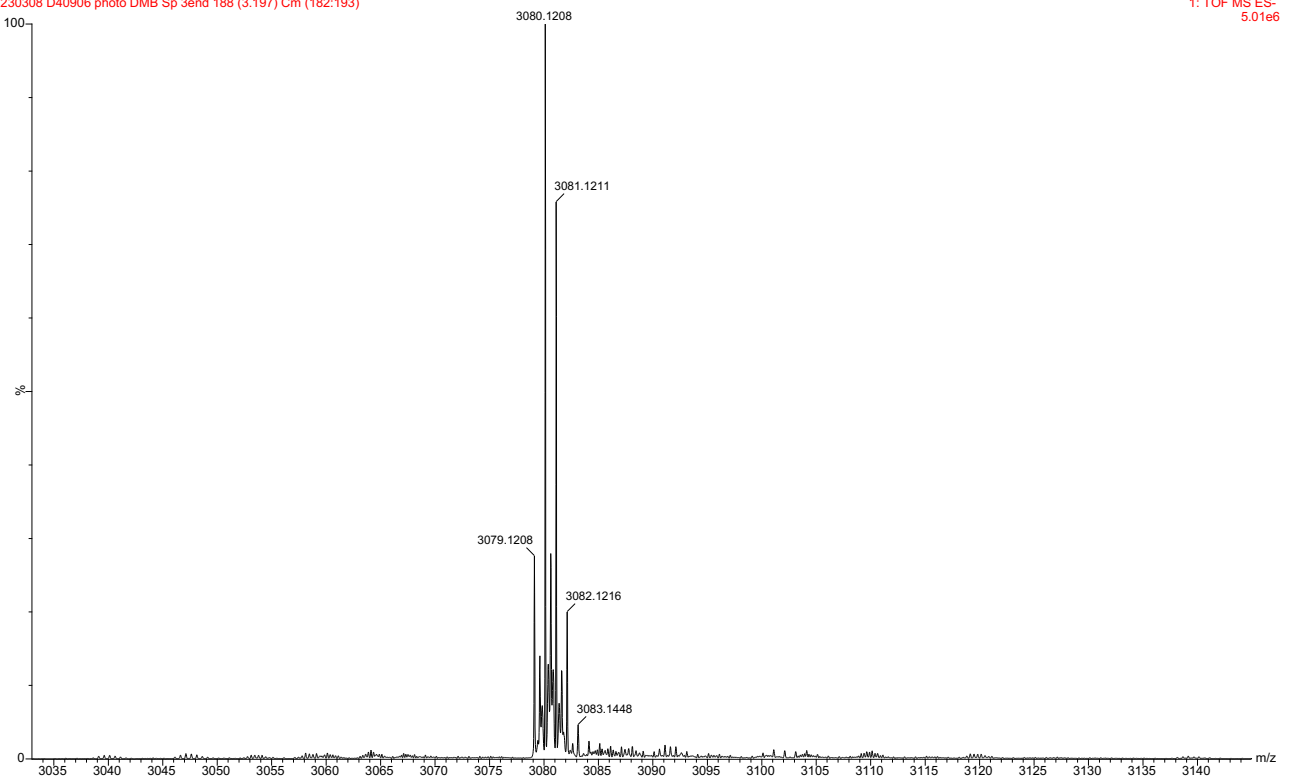

# Oligo-3 (R<sub>p</sub>)-TTTTT<sub>Alk</sub>TTTTT

2: UV Detector: 260.003 Nm

4.308e-1

Range: 5.379e-1

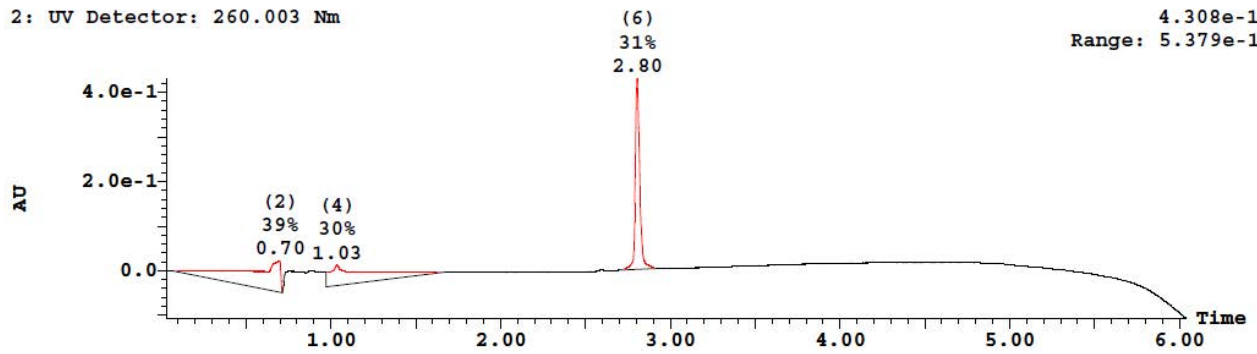

1: TOF MS ES- :TIC Smooth (Mn, 2x2)

1.4e+008

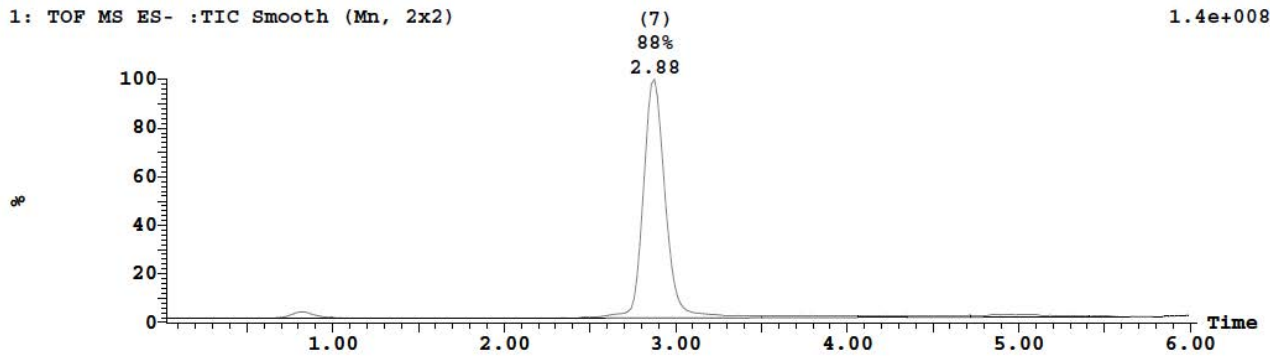

10-80

230308 D40906 photo DMB Rp mid 168 (2.859) Cm (163:176)

1: TOF MS ES-  
8.06e7

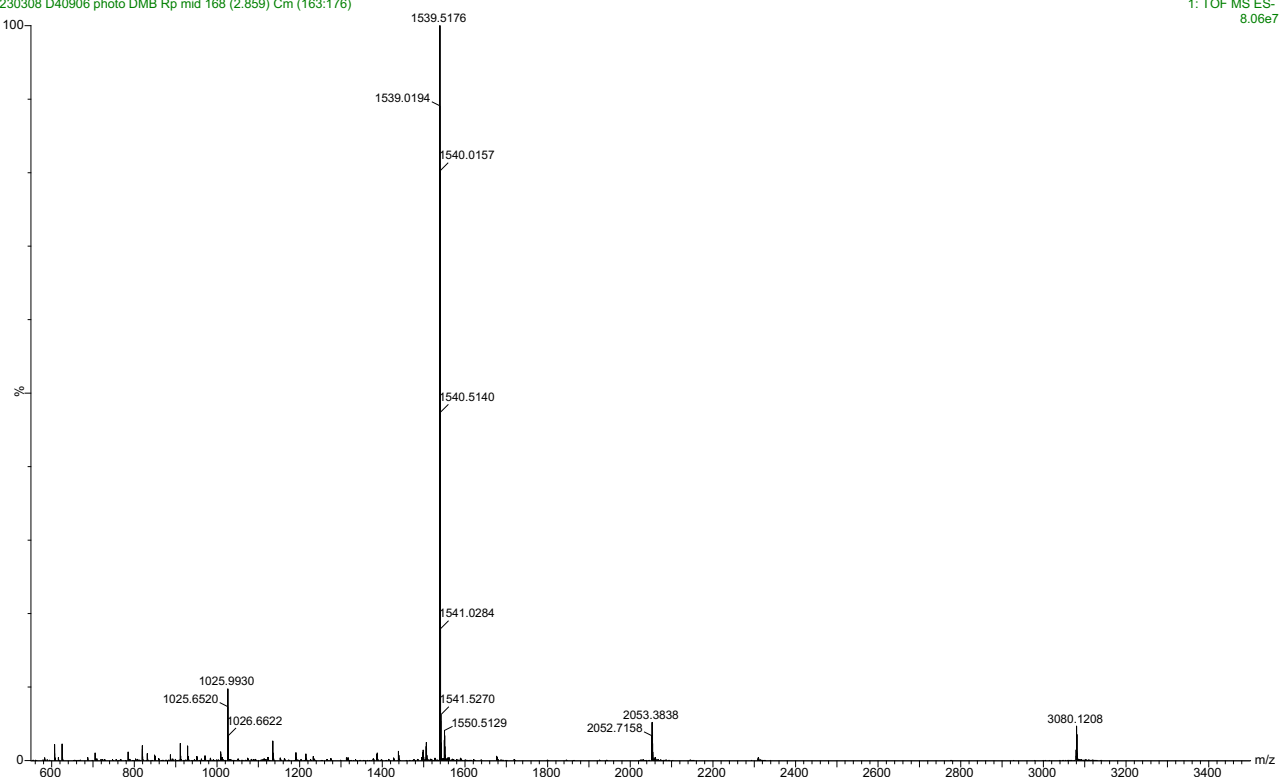

10-80

230308 D40906 photo DMB Rp mid 168 (2.859) Cm (163:176)

1: TOF MS ES-  
8.06e7

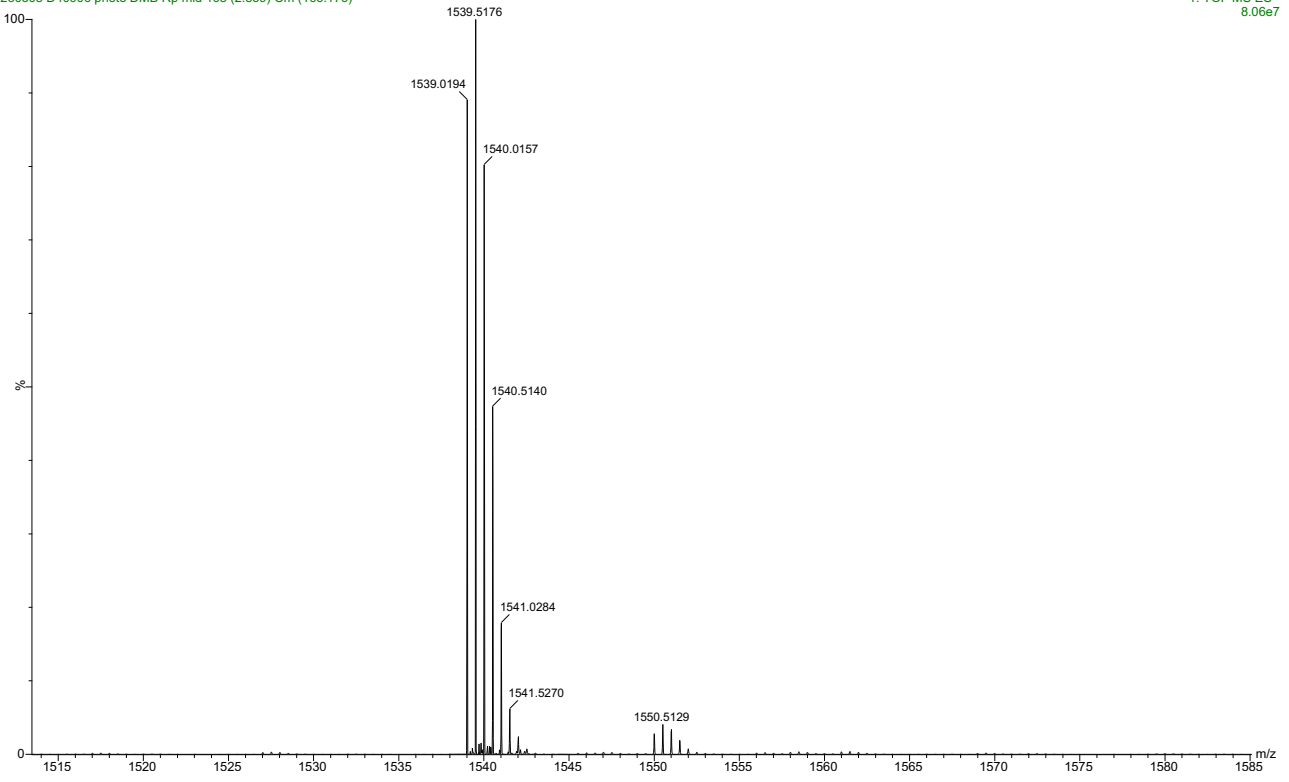

10-80

230308 D40906 photo DMB Rp mid 168 (2.859) Cm (163:176)

1: TOF MS ES-  
3.76e6

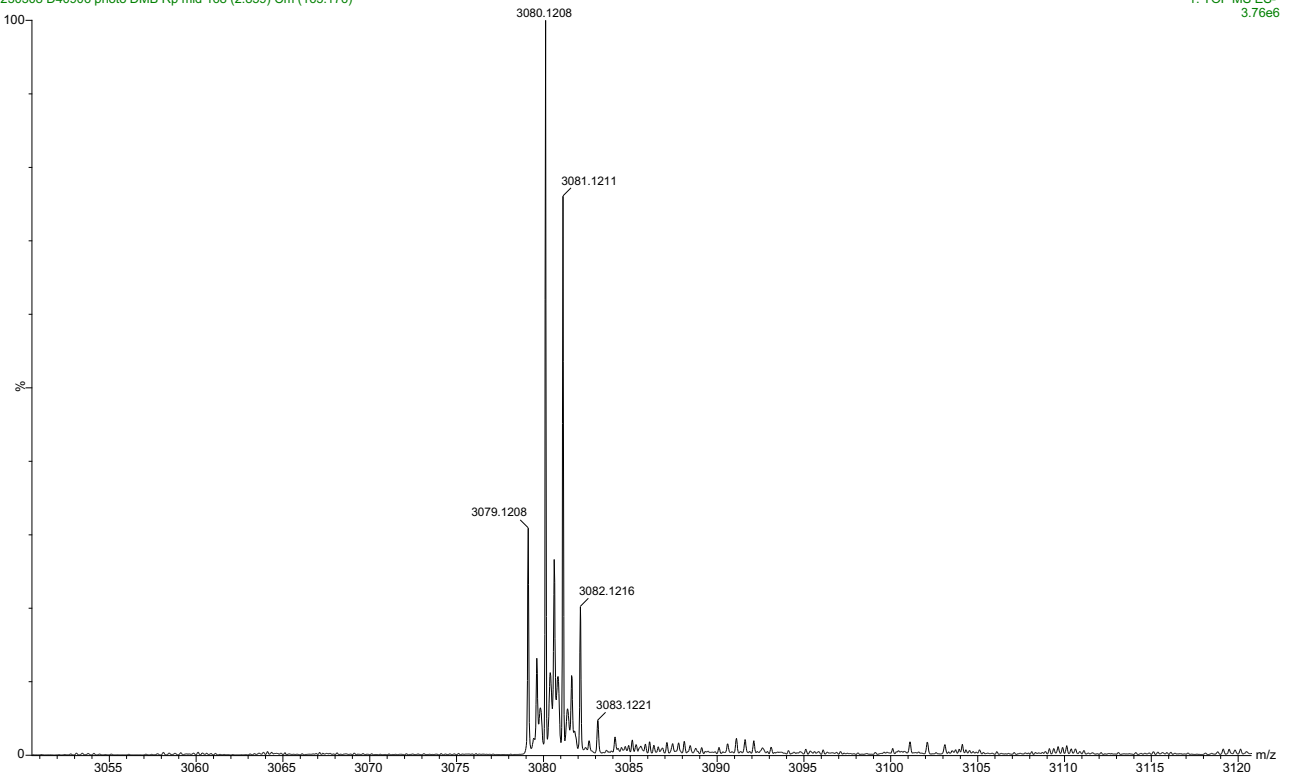



# Oligo-4 (S<sub>P</sub>)-TTTTT<sub>Alk</sub>TTTTT

2: UV Detector: 260.003 Nm

2.972e-1

Range: 4.048e-1

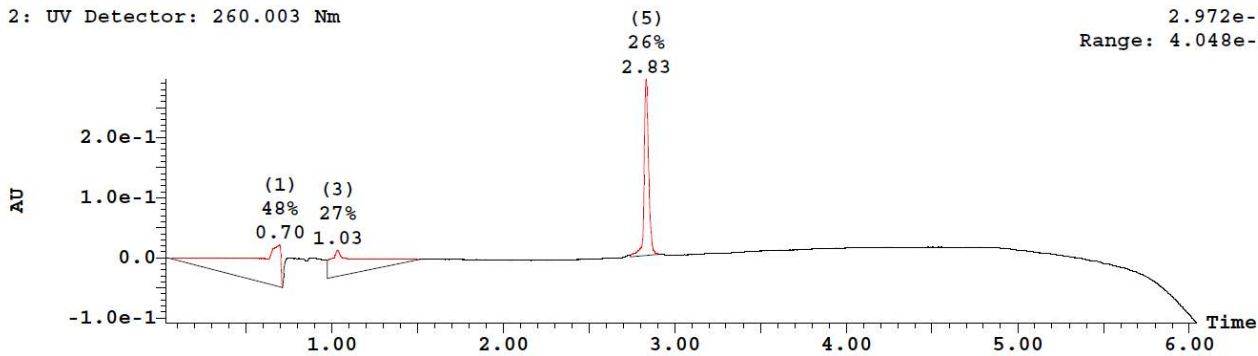

1: TOF MS ES- :TIC Smooth (Mn, 2x2)

1.2e+008

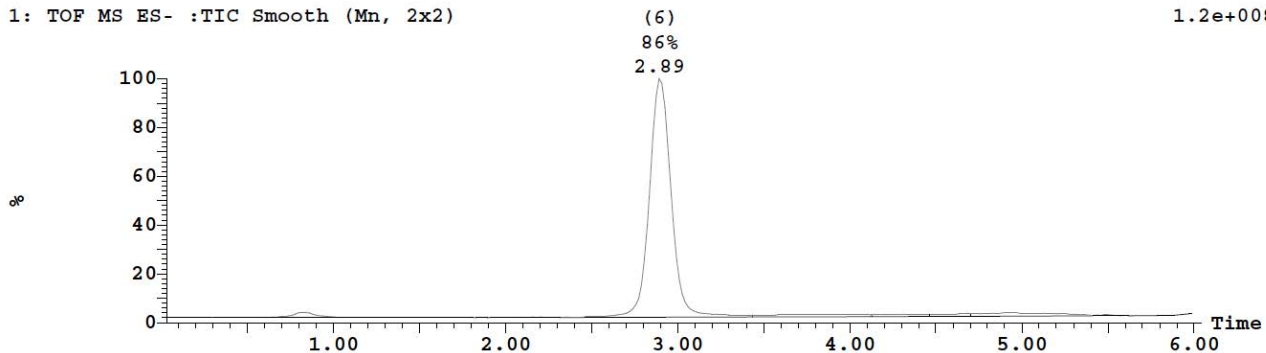

10-80

230308 D40906 photo DMB Sp mid 170 (2.893) Cm (165:177)

1: TOF MS ES-  
7.31e7

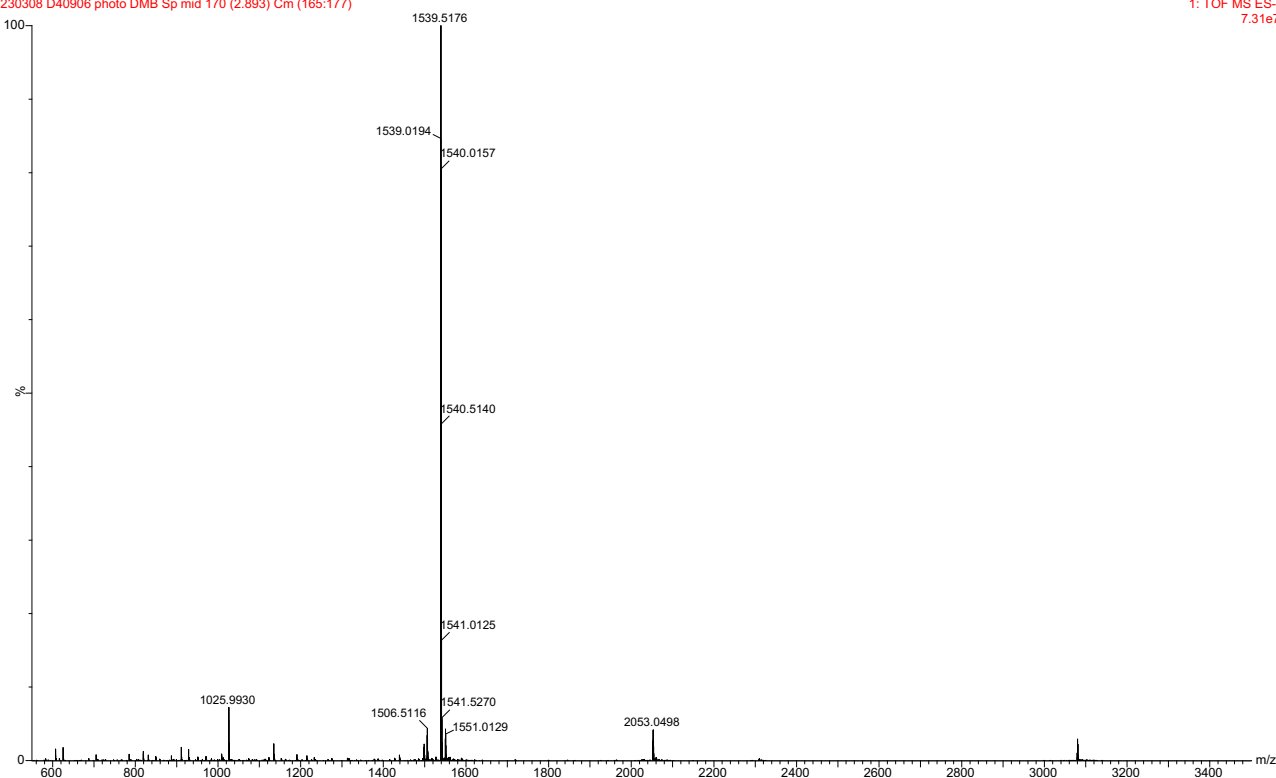

10-80

230308 D40906 photo DMB Sp mid 170 (2.893) Cm (165:177)

1: TOF MS ES-  
7.31e7

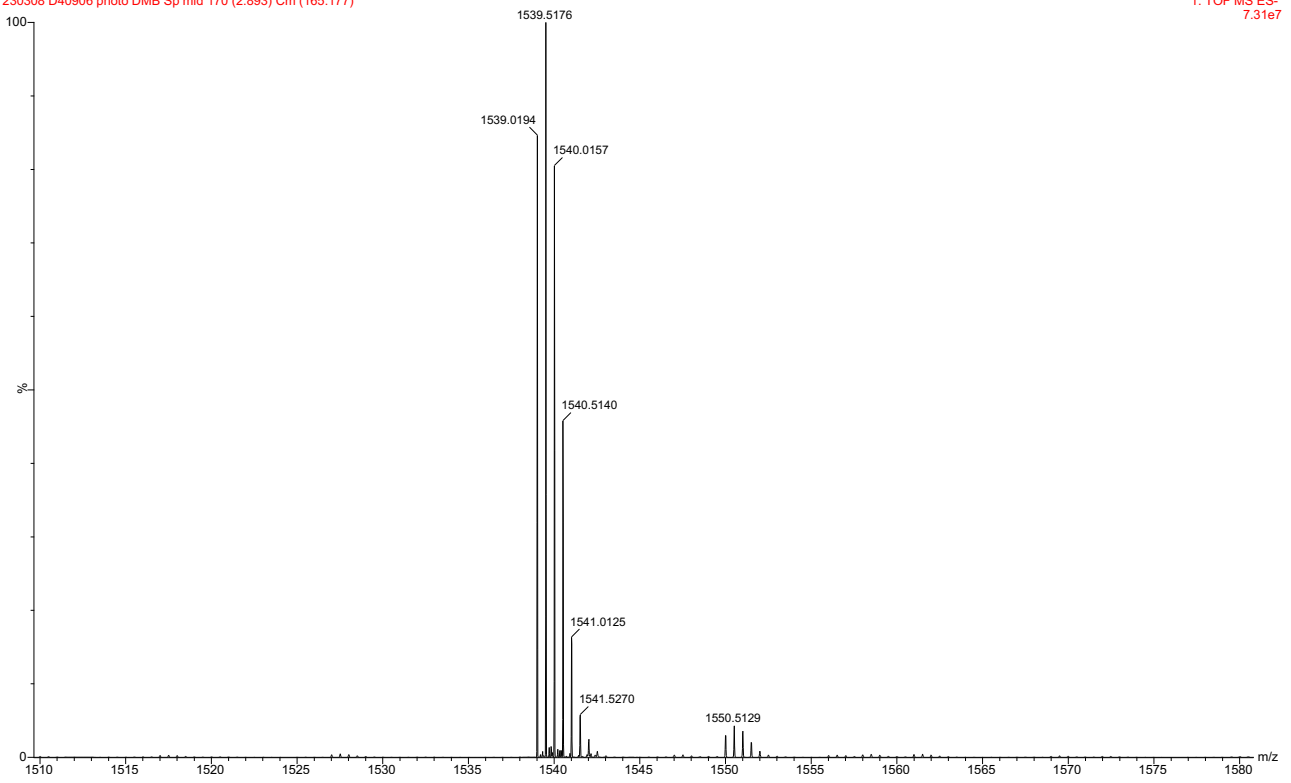

10-80

230308 D40906 photo DMB Sp mid 170 (2.893) Cm (165:177)

1: TOF MS ES-  
2.14e6

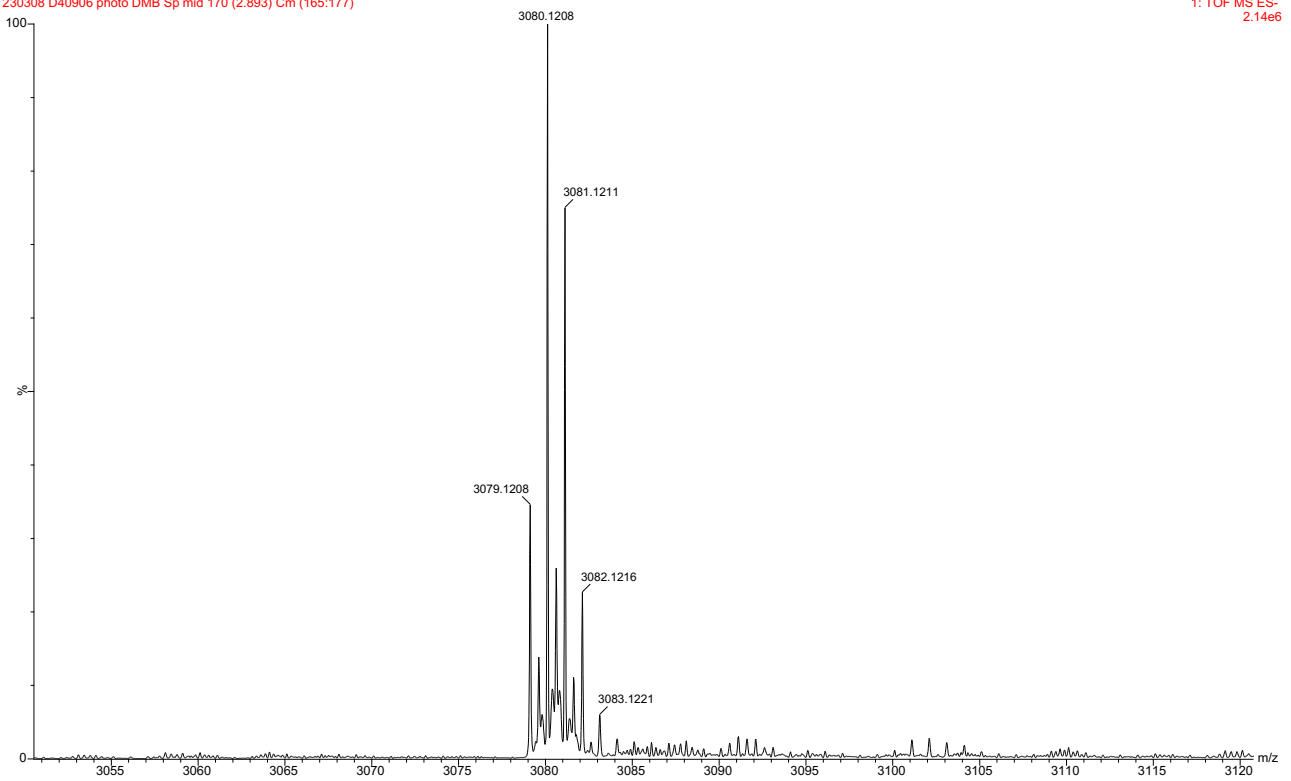

# Oligo-5 (S<sub>P</sub>,S<sub>P</sub>)-T<sub>Alk</sub>TTTTTTTT<sub>Alk</sub>T

2: UV Detector: 260.003 Nm

3.204e-1  
Range: 4.275e-1

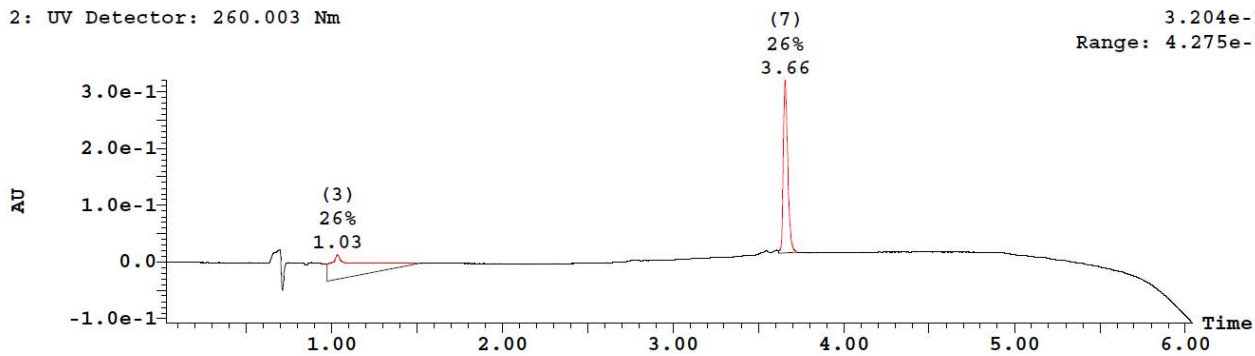

1: TOF MS ES- :TIC Smooth (Mn, 2x2)

1.4e+008

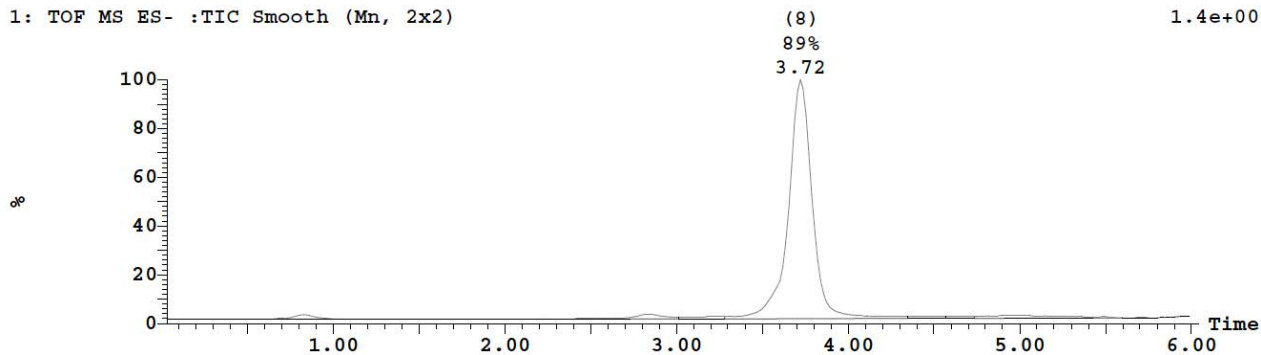

10-80

230308 D40906 photo DMB Sp 53end 218 (3.705) Cm (214:227)

1: TOF MS ES-  
8.94e7

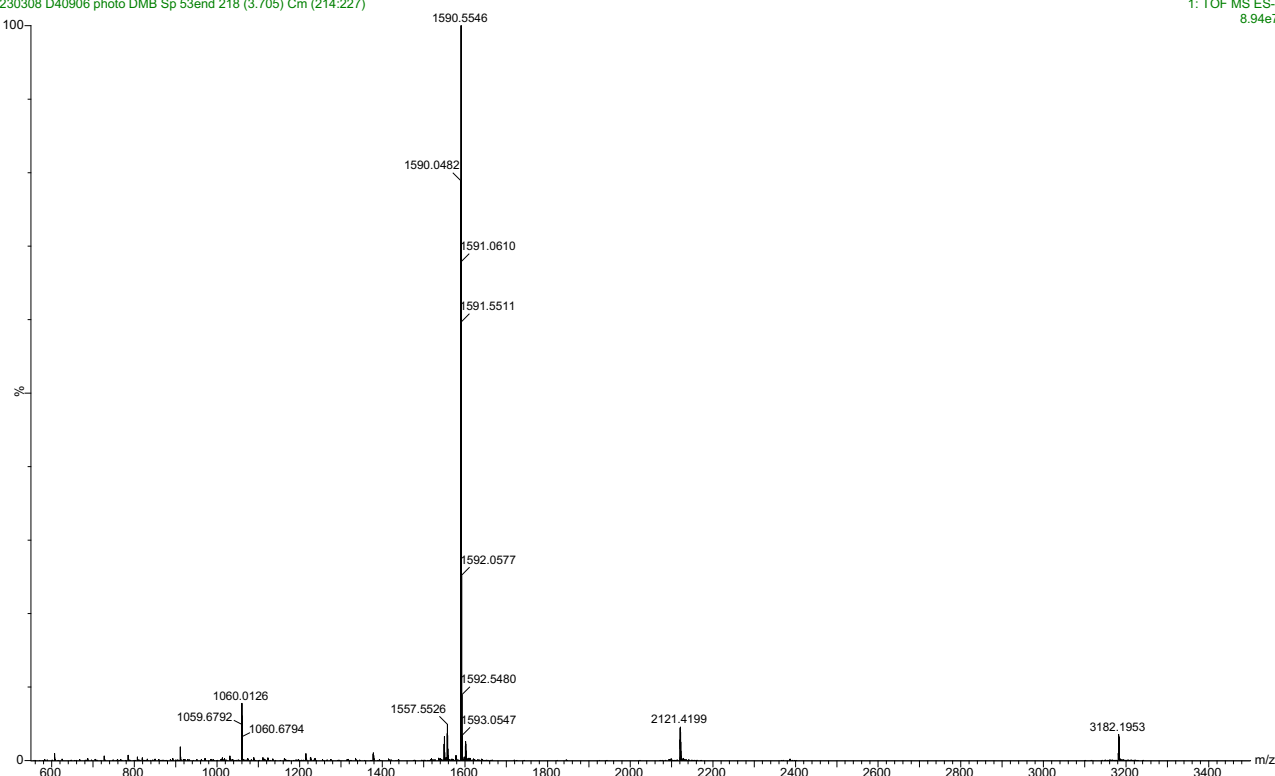

10-80

230308 D40906 photo DMB Sp 53end 218 (3.705) Cm (214:227)

1: TOF MS ES-  
8.94e7

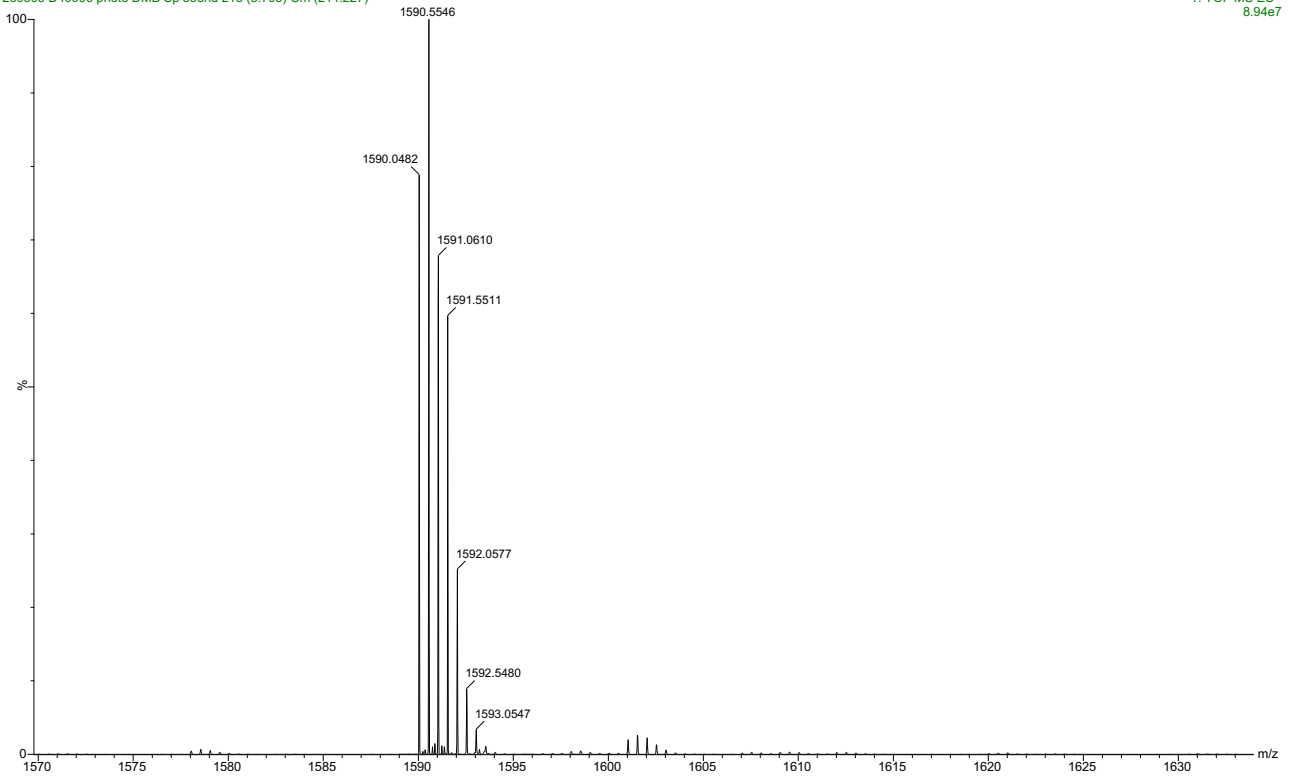

10-80

230308 D40906 photo DMB Sp 53end 218 (3.705) Cm (214:227)

1: TOF MS ES-  
3.19e6

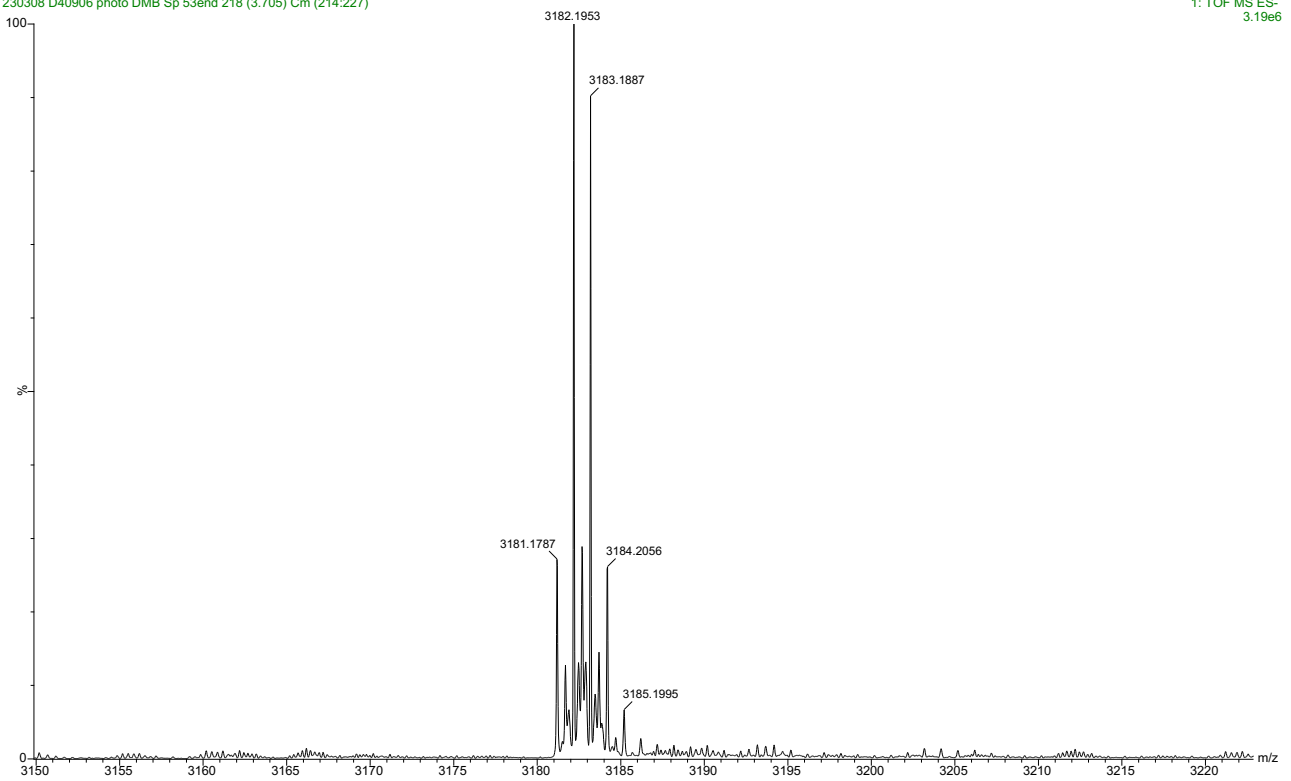

# Oligo-6 TTTTTTTTTT

2: UV Detector: 260.003 Nm

9.369e-1  
Range: 1.047

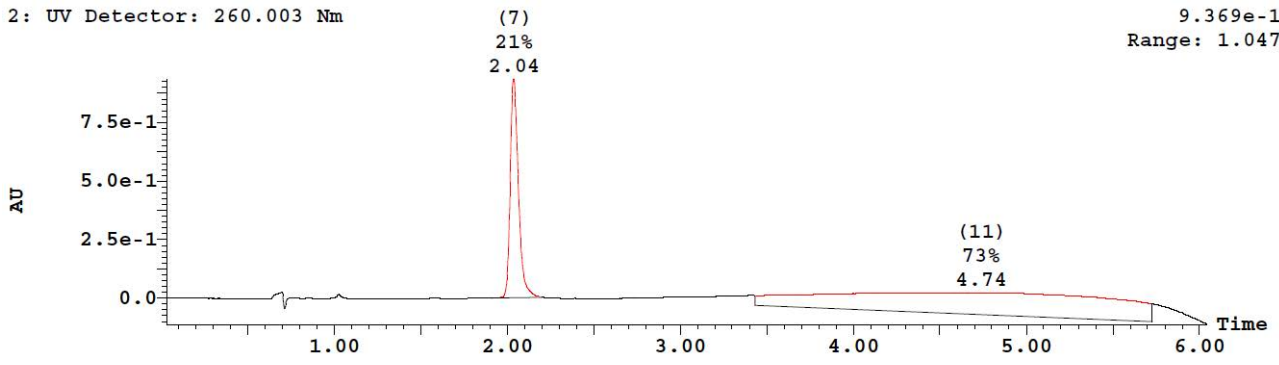

1: TOF MS ES- :TIC Smooth (Mn, 2x2)

2.6e+008

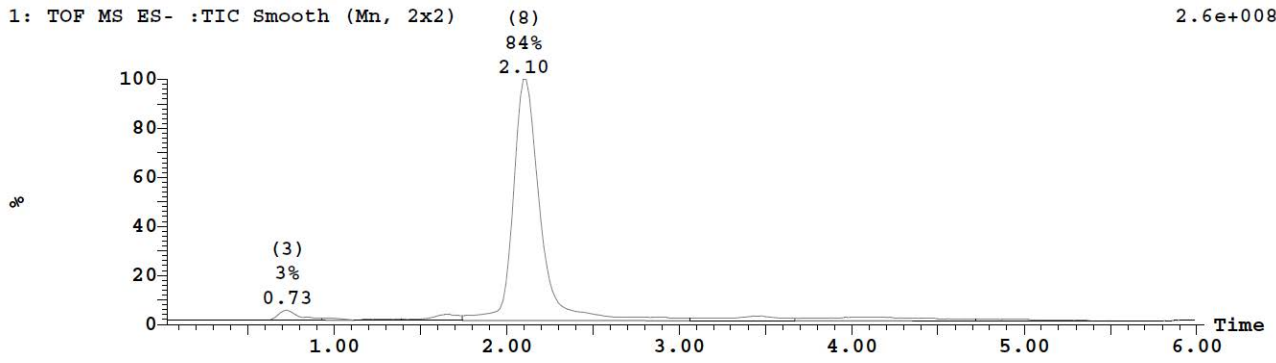

10-80

230427 D40905 photo PO 1 123 (2.097) Cm (117:129)

1: TOF MS ES-  
1.07e8

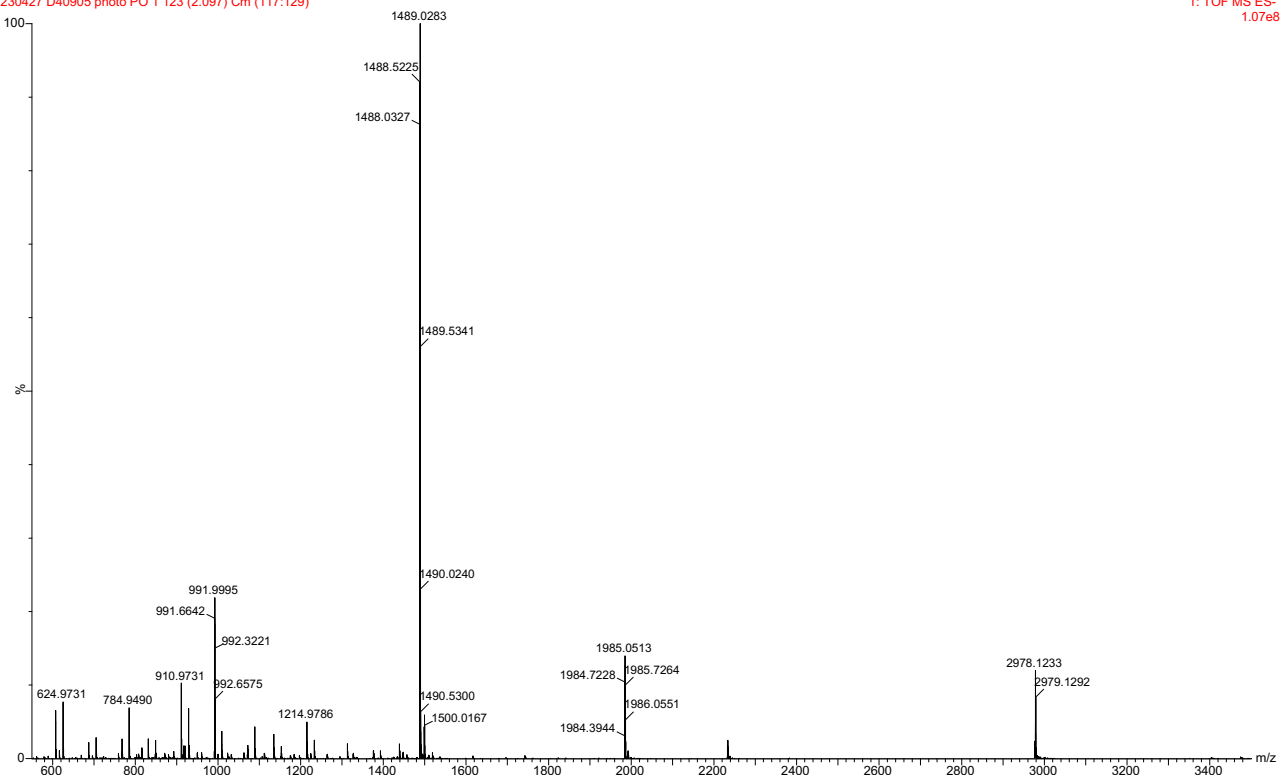

10-80

230427 D40905 photo PO 1 123 (2.097) Cm (117:129)

1: TOF MS ES-  
1.07e8

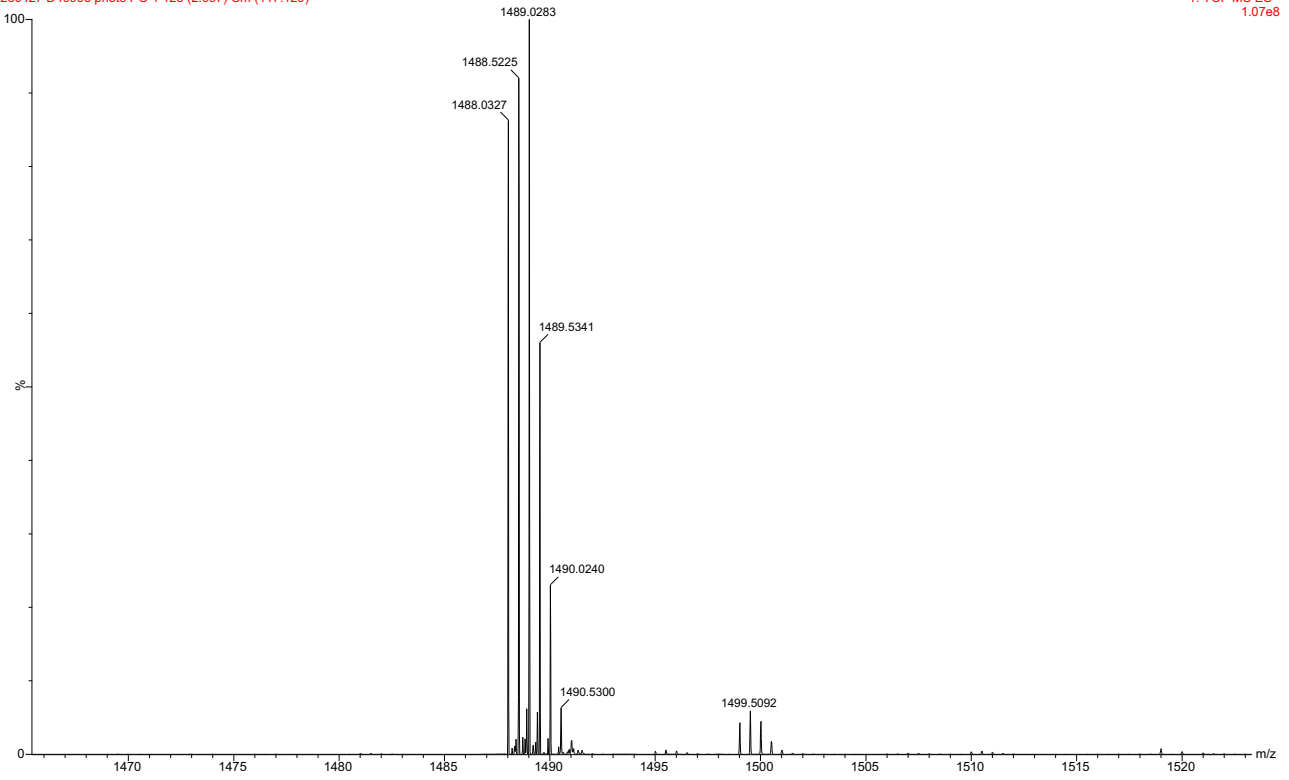

10-80

230427 D40905 photo PO 1 123 (2.097) Cm (117:129)

1: TOF MS ES-  
1.28e7

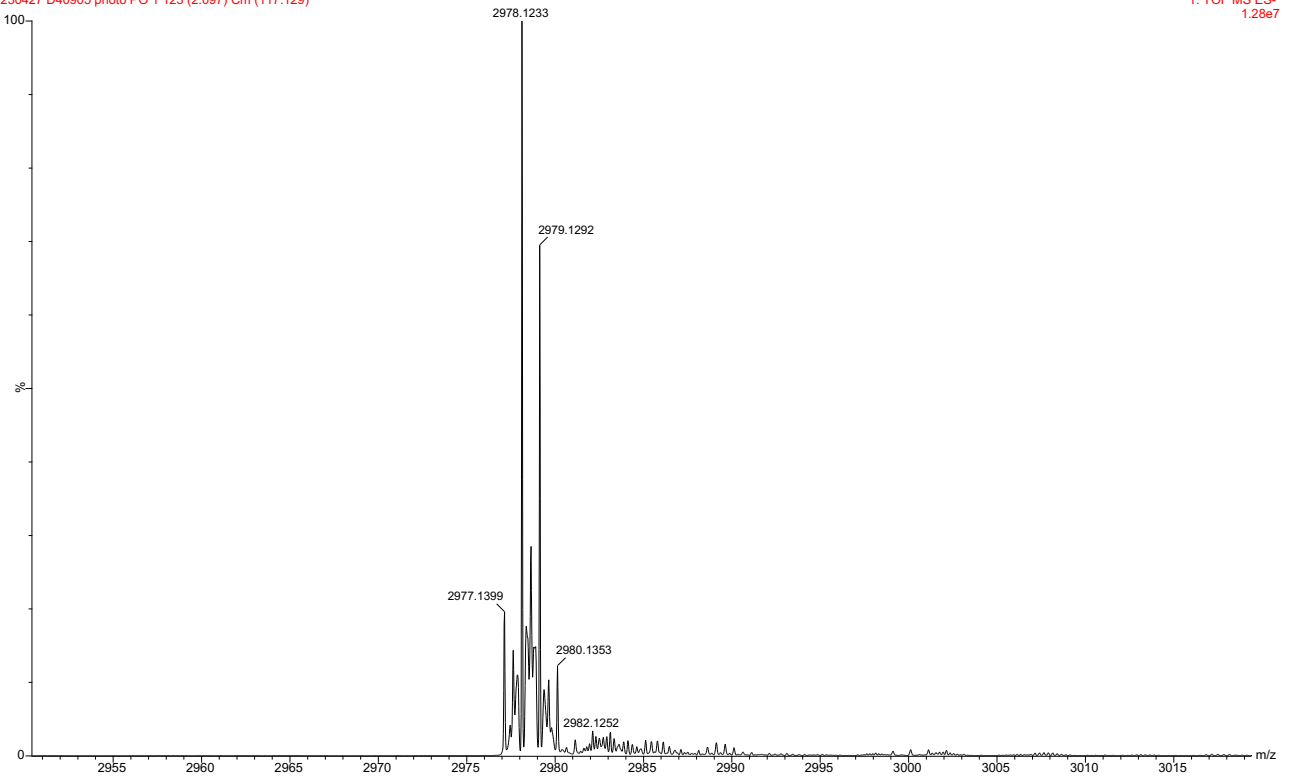

# Oligo-7 TTTTTTTTTT<sub>OE</sub>T

2: UV Detector: 260.003 Nm

2.555e-1

Range: 3.624e-1

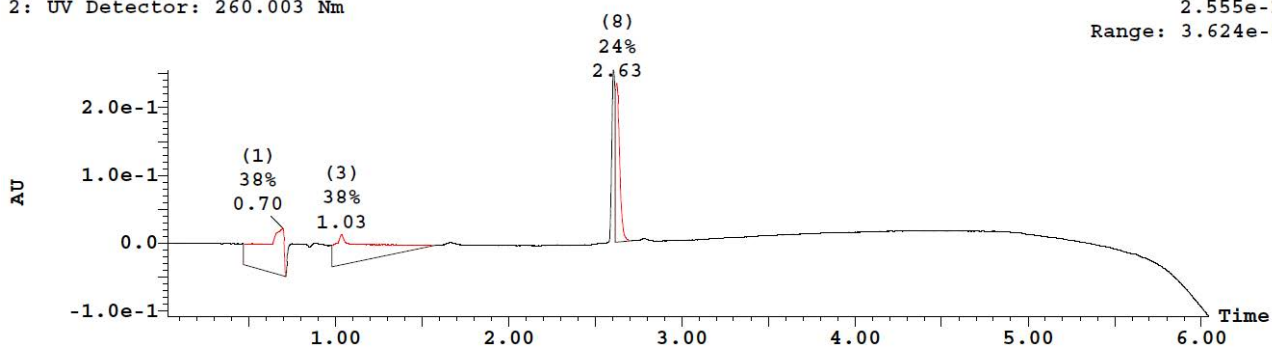

1: TOF MS ES- :TIC Smooth (Mn, 2x2)

1.3e+008

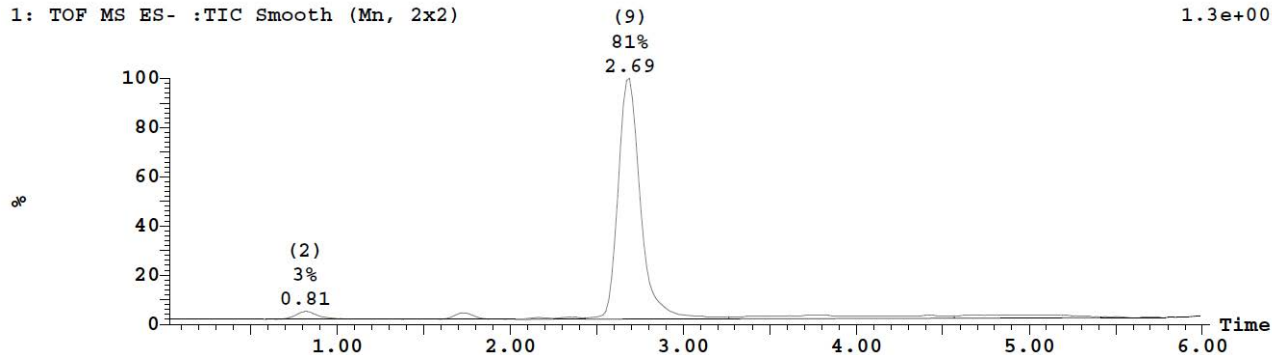

10-80

230308 D40906 photo POEt 2 157 (2.673) Cm (156:162)

1: TOF MS ES-  
7.09e7

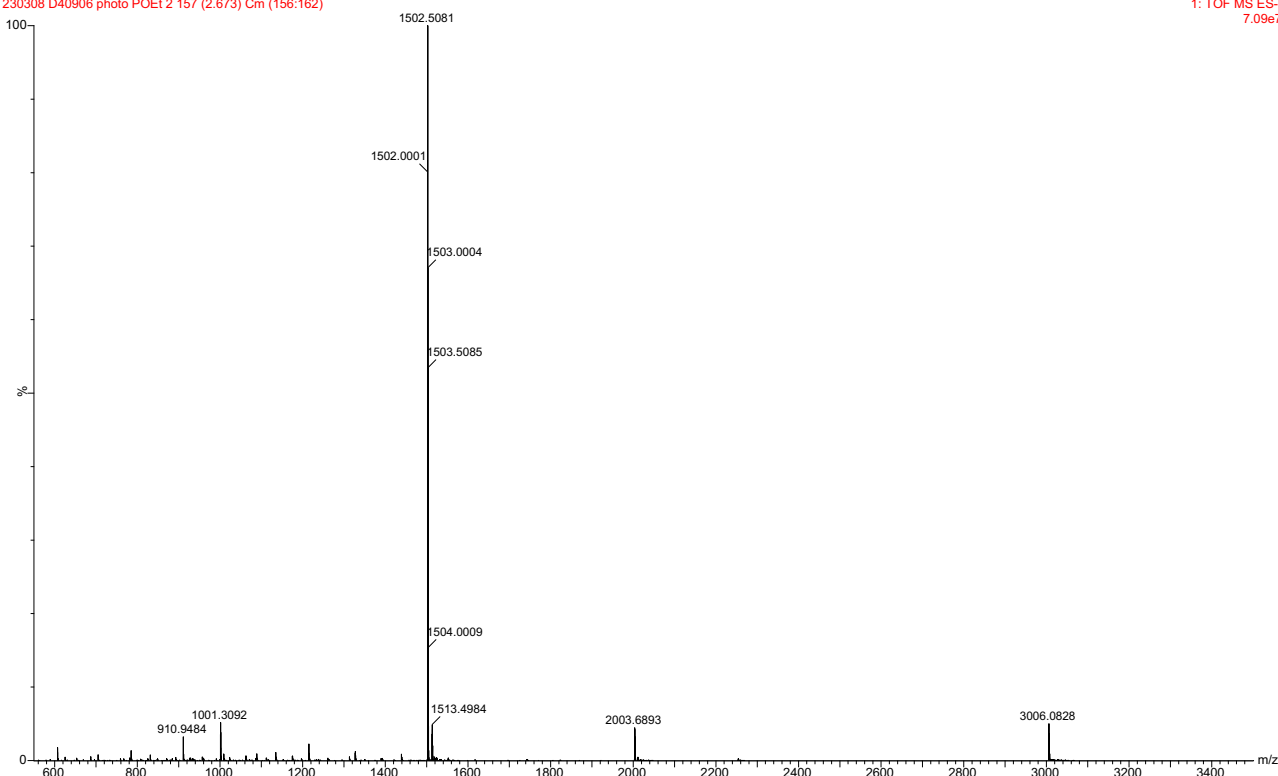

10-80

230308 D40906 photo POEt 2 157 (2.673) Cm (156:162)

1: TOF MS ES-  
7.09e7

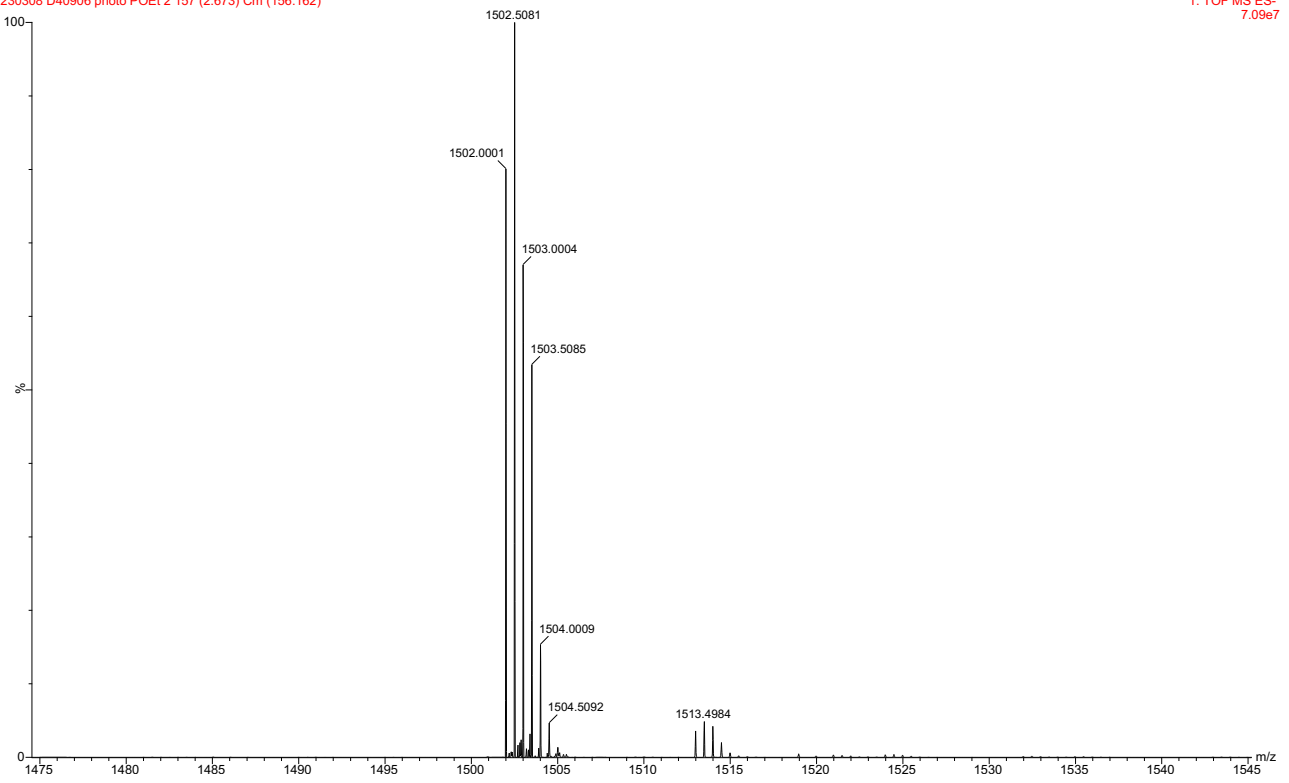

10-80

230308 D40906 photo POEt 2 157 (2.673) Cm (156:162)

1: TOF MS ES-  
3.55e6

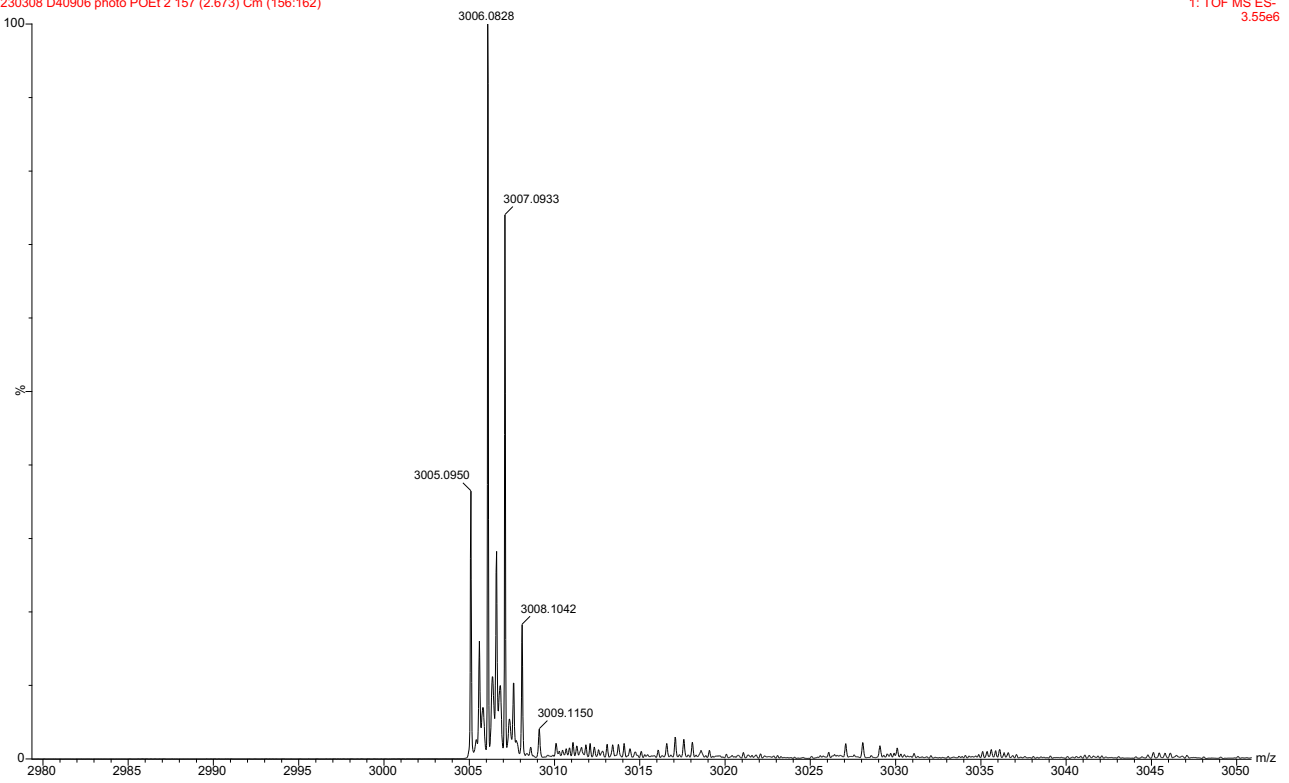



# Oligo-8 TTTTTTTTTT<sub>MOP</sub>T

2: UV Detector: 260.003 Nm

1.87e-1  
Range: 2.945e-1

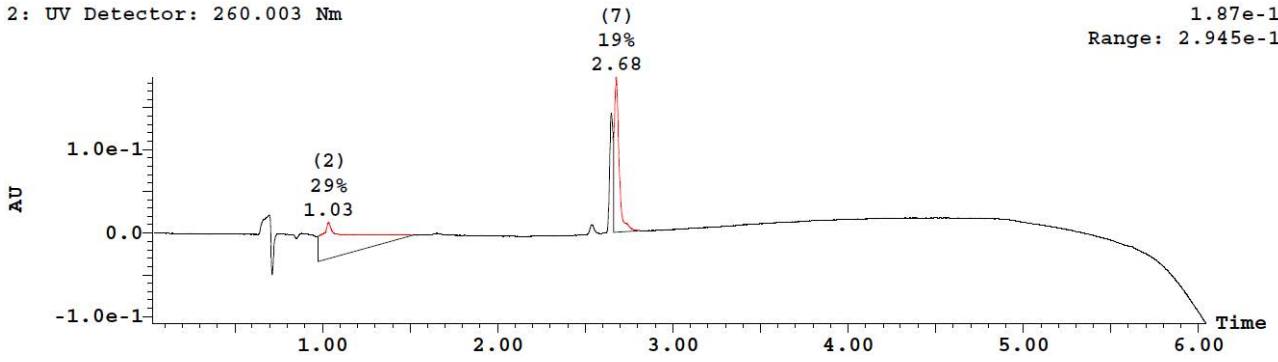

1: TOF MS ES- :TIC Smooth (Mn, 2x2)

1.1e+008

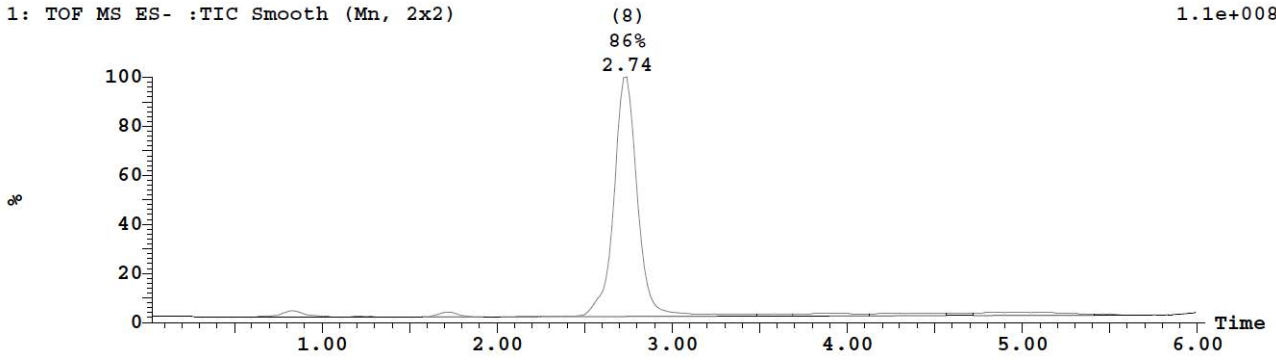

10-80

230308 D40905 photo MOP 160 (2.723) Cm (156:164)

1: TOF MS ES-  
7.25e7

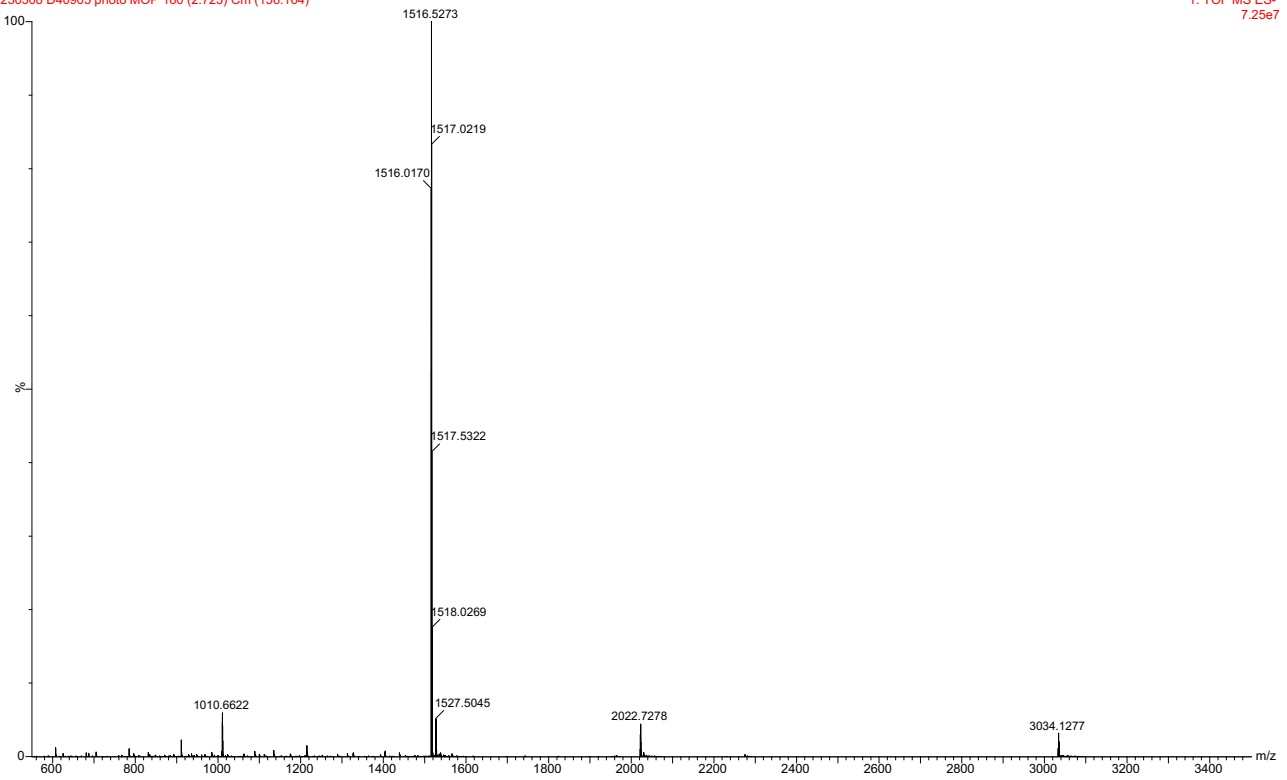

10-80  
230308 D40905 photo MOP 160 (2.723) Cm (156:164)

1: TOF MS ES-  
7.25e7

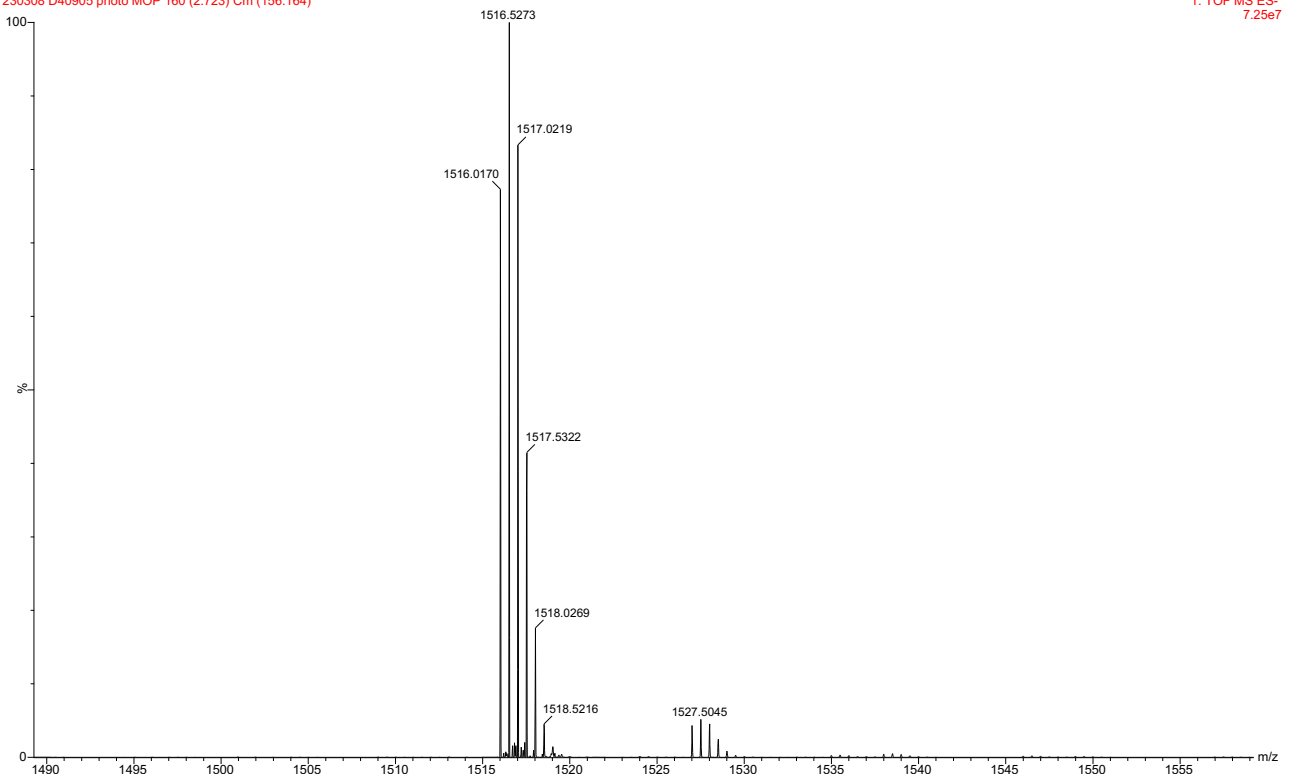

10-80  
230308 D40905 photo MOP 160 (2.723) Cm (156:164)

1: TOF MS ES-  
2.31e6

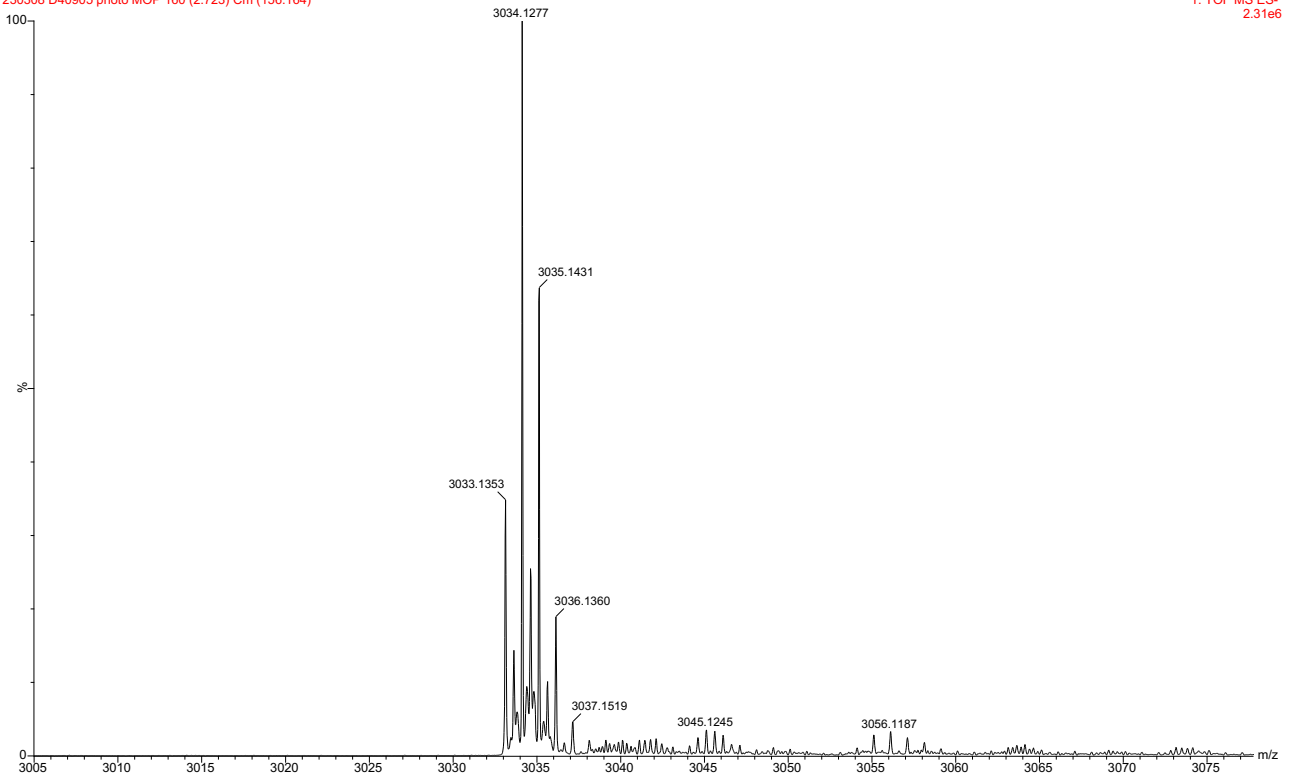

| Synthesized oligonucleotides                                              | MW: M-H (calcd) | MW: M-H (obsd) | crude yield (%) | retention time on LC (min) |
|---------------------------------------------------------------------------|-----------------|----------------|-----------------|----------------------------|
| <b>Oligo-1</b> ( $R_P$ )-TTTTTTTTT <sub>Alk</sub> T                       | 3079.58         | 3079.14        | 35              | 3.09                       |
| <b>Oligo-2</b> ( $S_P$ )-TTTTTTTTT <sub>Alk</sub> T                       | 3079.58         | 3079.12        | 43              | 3.14                       |
| <b>Oligo-3</b> ( $R_P$ )-TTTTT <sub>Alk</sub> TTTTT                       | 3079.58         | 3079.12        | 47              | 2.80                       |
| <b>Oligo-4</b> ( $S_P$ )-TTTTT <sub>Alk</sub> TTTTT                       | 3079.58         | 3079.12        | 31              | 2.83                       |
| <b>Oligo-5</b> ( $S_P, S_P$ )-T <sub>Alk</sub> TTTTTTTTT <sub>Alk</sub> T | 3181.66         | 3181.18        | 32              | 3.66                       |
| <b>Oligo-6</b> TTTTTTTTTT                                                 | 2977.50         | 2977.14        | 52              | 2.04                       |
| <b>Oligo-7</b> TTTTTTTTTT <sub>OEt</sub> T                                | 3005.53         | 3005.10        | 25              | 2.63*                      |
| <b>Oligo-8</b> TTTTTTTTTT <sub>MOP</sub> T                                | 3033.56         | 3033.14        | 37              | 2.68*                      |

\* LC diagram showed shouldered peaks in these compounds. MS spectra of each compound was the same, suggesting that they are diastereomers with a different stereo configuration around backbone phosphorous atom.

#### Supplementary Fig. 4. Summary of Yields and Retention Time of Oligo-1-8

#### Comparizon between other charge-neutral backbonemodified Oligos (Oligo1,2 vs. Oligo-7,8)

Retention time (lipophilicity) of **Oligo-1** and **Oligo-2** was increased compared to the ethyl-triester- and MOP-modified oligos (**Oligo-7** and **8**), and the retention time gap due to the difference between the  $S_P$  and  $R_P$  configurations was also expanded. The influence of chirality on global hydrophilicity/hydrophobicity seemed to be increased due to its large size, which may also contribute to protein binding profiles and lead to eutomer/distomer differences as a pharmaceutical.

10-80  
230308 D40906 photo POEt 2

2: Diode Array  
Range: 1.451e+1

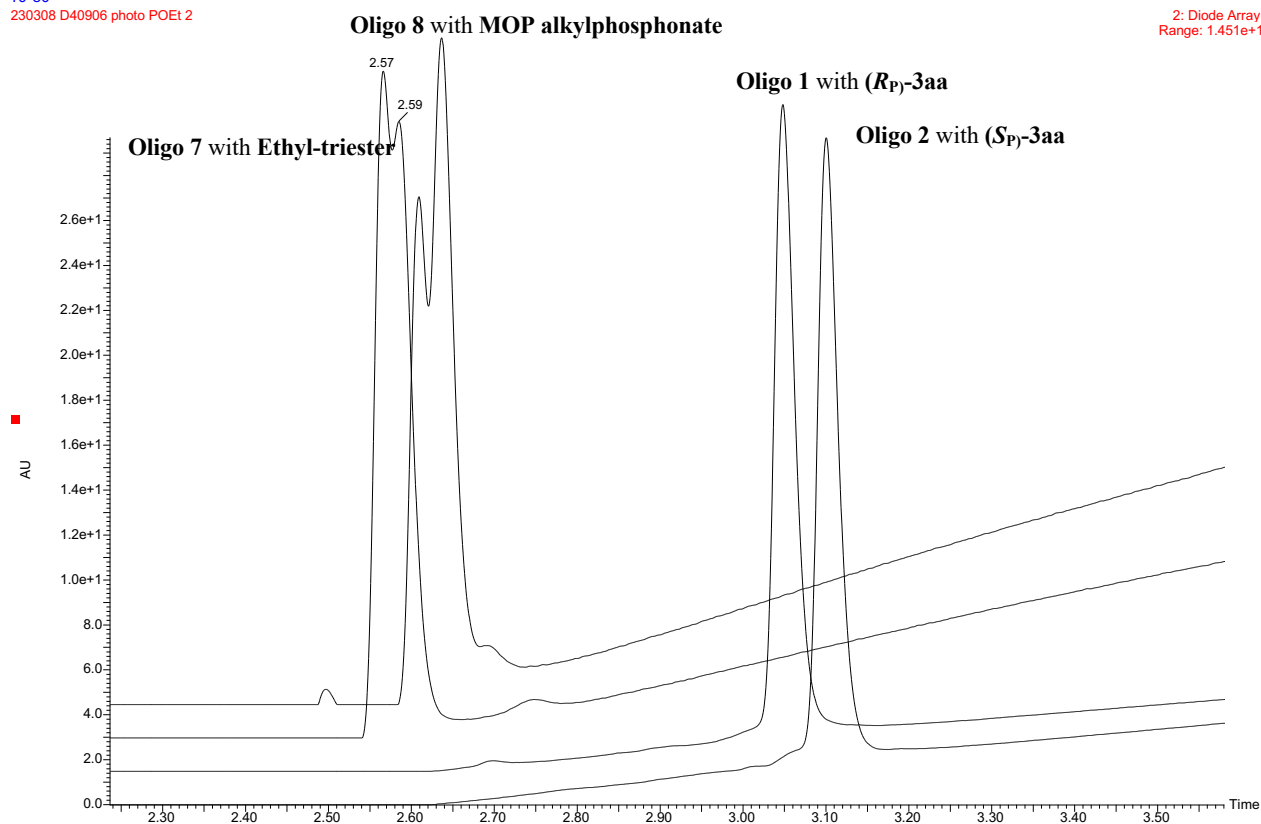

## 11. Detection of Alkylsulfonium

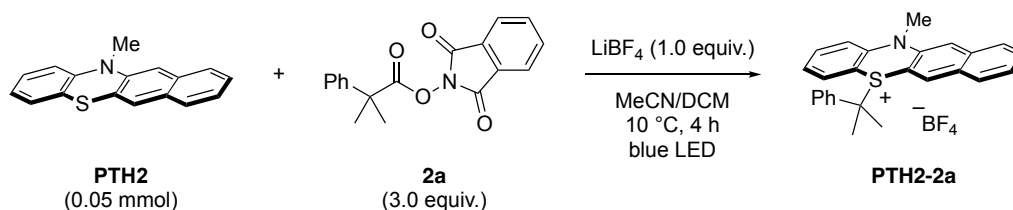

Supplementary Fig. 5. Detection of Alkylsulfonium

In a glovebox, to an oven-dried vial equipped with a stirring bar was added **PTH2** (13.2 mg, 0.05 mmol), redox-active ester **2a** (46.4 mg, 0.15 mmol) and LiBF<sub>4</sub> (4.7 mg, 0.15 mmol). Then, MeCN (300 μL) and DCM (200 μL) were added to the reaction mixture. After sealing the vial with a cap and removed from the glove box, the reaction was stirred and irradiated with a 34W blue LED with a cooling UC reactor to keep the temperature at 10 °C (Supplementary Fig. 2). After 4 h, the reaction solution was directly used for MS analysis (HRMS–ESI). **PTH2-2a**: HRMS–ESI (m/z): [M–BF<sub>4</sub>]<sup>+</sup> calcd for C<sub>26</sub>H<sub>24</sub>NS, 382.1624; found, 382.1614.

## 12. Effects of Additives on Conversion of Redox-Active Esters

In a glovebox, to an oven-dried vial with a stirring bar was added **PTH2** (13.2 mg, 0.05 mmol), phosphite **1a** (42.9 mg, 0.05 mmol), redox-active ester **2a** (46.4 mg, 0.15 mmol), LiBF<sub>4</sub> (4.7 mg, 0.15 mmol) and thymine (6.3 mg, 0.05 mmol). Then, MeCN (300 μL) and DCM (200 μL) were added to the reaction mixture. After sealing the vial with parafilm, the reaction mixture was stirred and irradiated with a 34W blue LED with a cooling UC reactor to keep the temperature at 10 °C (Supplementary Fig. 2). After 4 h, the solvents were removed under reduced pressure and the residue was analyzed by <sup>1</sup>H NMR. The increase in conversion of **2a** to 28% was observed with the addition of thymine compared to without thymine (11%).

## 13. Comparison with Other Carbocation Methods

**Comparison with Aggarwal's Method.** Tertiary alkylation of phosphite **1a-1** was conducted with reference to the reported procedure.<sup>14</sup> In a glovebox, to an oven-dried vial with a stirring bar was added photoredox catalyst 4CzIPN (0.79 mg, 0.001 mmol), phosphite **1a-1** (42.9 mg, 0.05 mmol) and redox-active ester **2a** (46.4 mg, 0.15 mmol). Then, MeCN (500 μL) and TFA (5.7 μL, 0.075 mmol) were added to the reaction mixture. After sealing the vial with parafilm, the reaction mixture was stirred and irradiated with a 34W blue LED (3 cm away) with a cooling fan to keep the temperature around 40 °C. After 2 h, the solvents were removed under reduced pressure and the residue was analyzed by <sup>1</sup>H NMR. However, the desired product **3aa** was not obtained, and the decomposition products of **1a-1** were observed.

**Comparison with methods using Lewis acid.** Tertiary alkylation of phosphite **1a-1** was conducted with reference to the reported procedure.<sup>15,16</sup> In a glovebox, to an oven-dried vial with a stirring bar was added phosphite **1a-1** (42.9 mg, 0.05 mmol) and 2-phenyl-2-propanol (**5a**) (20.4 mg, 0.15 mmol). Then, toluene (500 μL) and Lewis acid TMSOTf (1.81 μL, 0.01 mmol) or ZnI<sub>2</sub> (23.9 mg, 0.075

mmol) were added to the reaction mixture. After sealing the vial with parafilm, the reaction mixture was stirred at 110 °C. After 15–24 h, the solvents were removed under reduced pressure and the residue was analyzed by <sup>1</sup>H NMR. However, the desired product **3aa** was not obtained, giving a complex mixture.

#### 14. The Effects of Chiral Leaving Groups

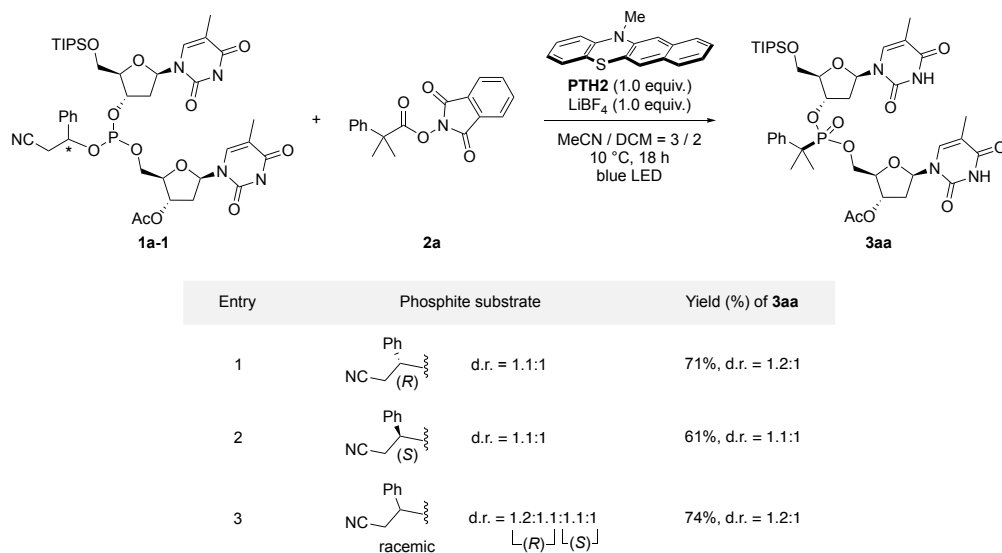

**Supplementary Fig. 6.** The Effects of Chiral Leaving Groups

Chiral alcohols were prepared from chiral styrene oxide.<sup>17</sup> Phosphite (*R*)/(*S*)-**1a-1** having chiral leaving groups were synthesized by the above mentioned procedure (Supplementary Fig. 1). In a glovebox, to an oven-dried vial with a stirring bar was added **PTH2** (13.2 mg, 0.05 mmol), phosphite (*R*)-**1a-1** or (*S*)-**1a-1** (42.9 mg, 0.05 mmol), redox-active ester **2a** (46.4 mg, 0.15 mmol) and LiBF<sub>4</sub> (4.7 mg, 0.05 mmol). Then, MeCN (300 μL) and DCM (200 μL) were added to the reaction mixture. After sealing the vial with parafilm, the reaction mixture was stirred and irradiated with a 34W blue LED with a cooling UC reactor to keep the temperature at 10 °C (Supplementary Fig. 2). After 18 h, the solvents were removed under reduced pressure and the yield was determined by <sup>1</sup>H-NMR analysis. The effect of the chiral leaving group on this reaction was investigated, but no significant difference in the yield and the ratio of diastereomers of the alkylated product **3aa** was observed.

#### 15. Examination of Catalytic Reactions

When simple phosphite **1g** was used as a nucleophile, oxidative alkylation proceeded catalytically with high efficiency (Supplementary Fig. 7A). On the other hand, when H-phosphonate **1h** was used as a nucleophile instead of phosphite, no alkylated product was obtained (Supplementary Fig. 7B).

**Procedure.** In a glovebox, to an oven-dried vial with a stirring bar was added **PTH1** (3.3 mg, 0.01 mmol), trihexyl phosphite **1g** (74.3 μL, 0.2 mmol) or dibutyl phosphite **1h** (39.2 μL, 0.2 mmol), redox-active ester **2a** (92.8 mg, 0.3 mmol), LiBF<sub>4</sub> (0.9 mg, 0.01 mmol) and DCM (600 μL). After sealing the vial with parafilm, the reaction mixture was stirred and irradiated with a 34W blue LED with a cooling fan to keep the temperature around 40 °C. After 16 h, the solvents were removed under reduced pressure and the residue was analyzed by <sup>1</sup>H NMR.

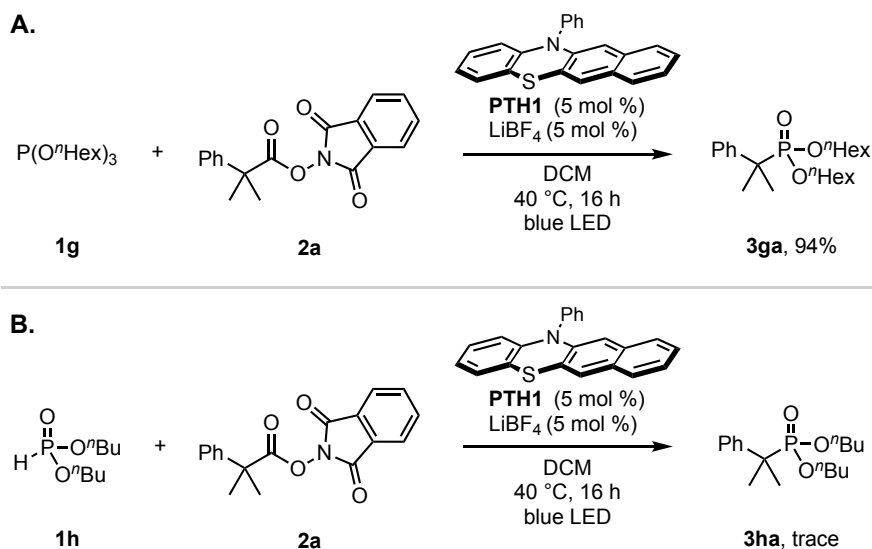

**Supplementary Fig. 7. Examination of Catalytic Reactions**

## 16. Examination of the Addition of Trapping Reagent for Carbocation

PTH-catalytic reactions were investigated by adding a stoichiometric amount of sulfilimine, used in the stabilized cation pool method,<sup>18</sup> as a trapping reagent for the carbocation, but the yield was not improved (Supplementary Fig. 8).

**Procedure.** In a glovebox, to an oven-dried vial with a stirring bar was added **PTH1** (1.63 mg, 0.005 mmol), phosphite **1a-1** (42.9 mg, 0.05 mmol), redox-active ester **2a** (46.4 mg, 0.15 mmol) or **2k** (37.1 mg, 0.15 mmol),  $\text{LiBF}_4$  (0.47 mg, 0.005 mmol) and sulfilimine (17.8 mg, 0.05 mmol). Then, MeCN (300  $\mu\text{L}$ ) and DCM (200  $\mu\text{L}$ ) were added to the reaction mixture. After sealing the vial with parafilm, the reaction mixture was stirred and irradiated with a 34W blue LED with a cooling UC reactor to keep the temperature at 10 °C (Supplementary Fig. 2). After 18 h, the solvents were removed under reduced pressure and the residue was analyzed by  $^1\text{H}$  NMR.

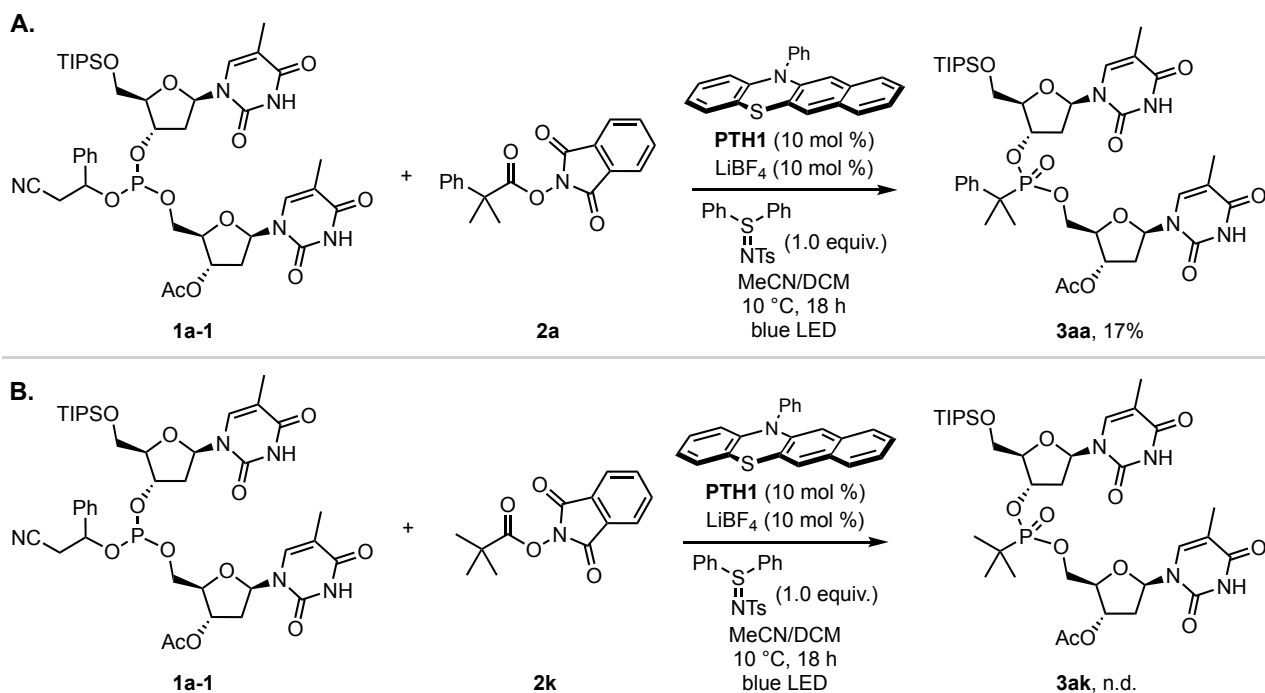

**Supplementary Fig. 8. Examination of the Addition of Trapping Reagent for Carbocation**

## 17. Unsuccessful Substrates

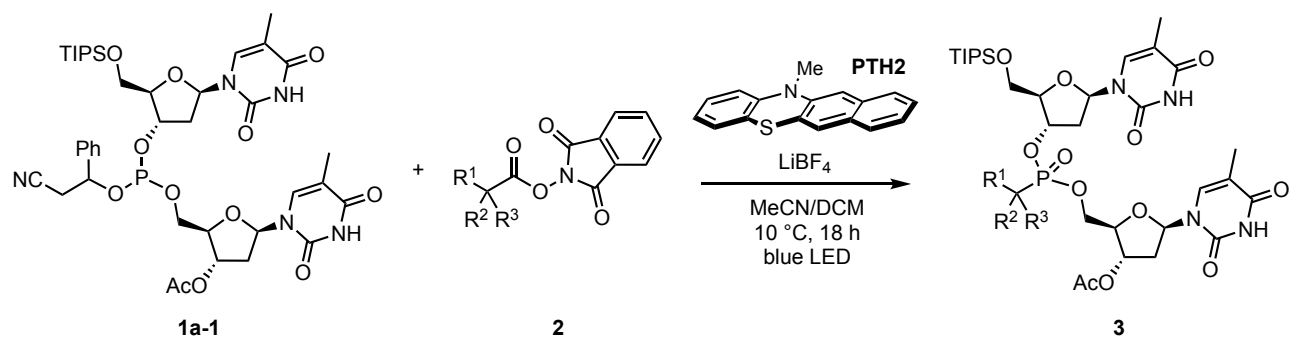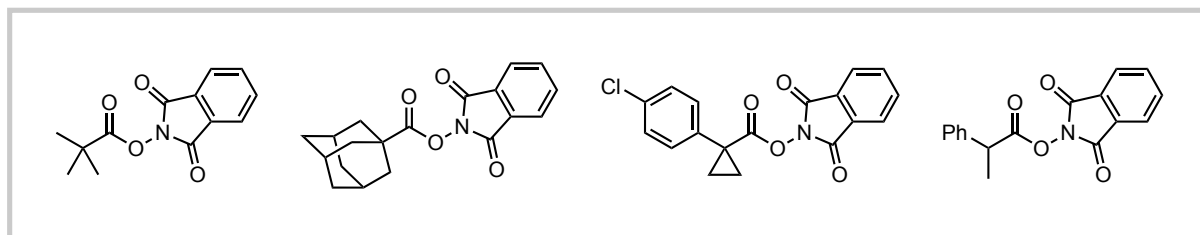

Supplementary Fig. 9. Unsuccessful Substrates

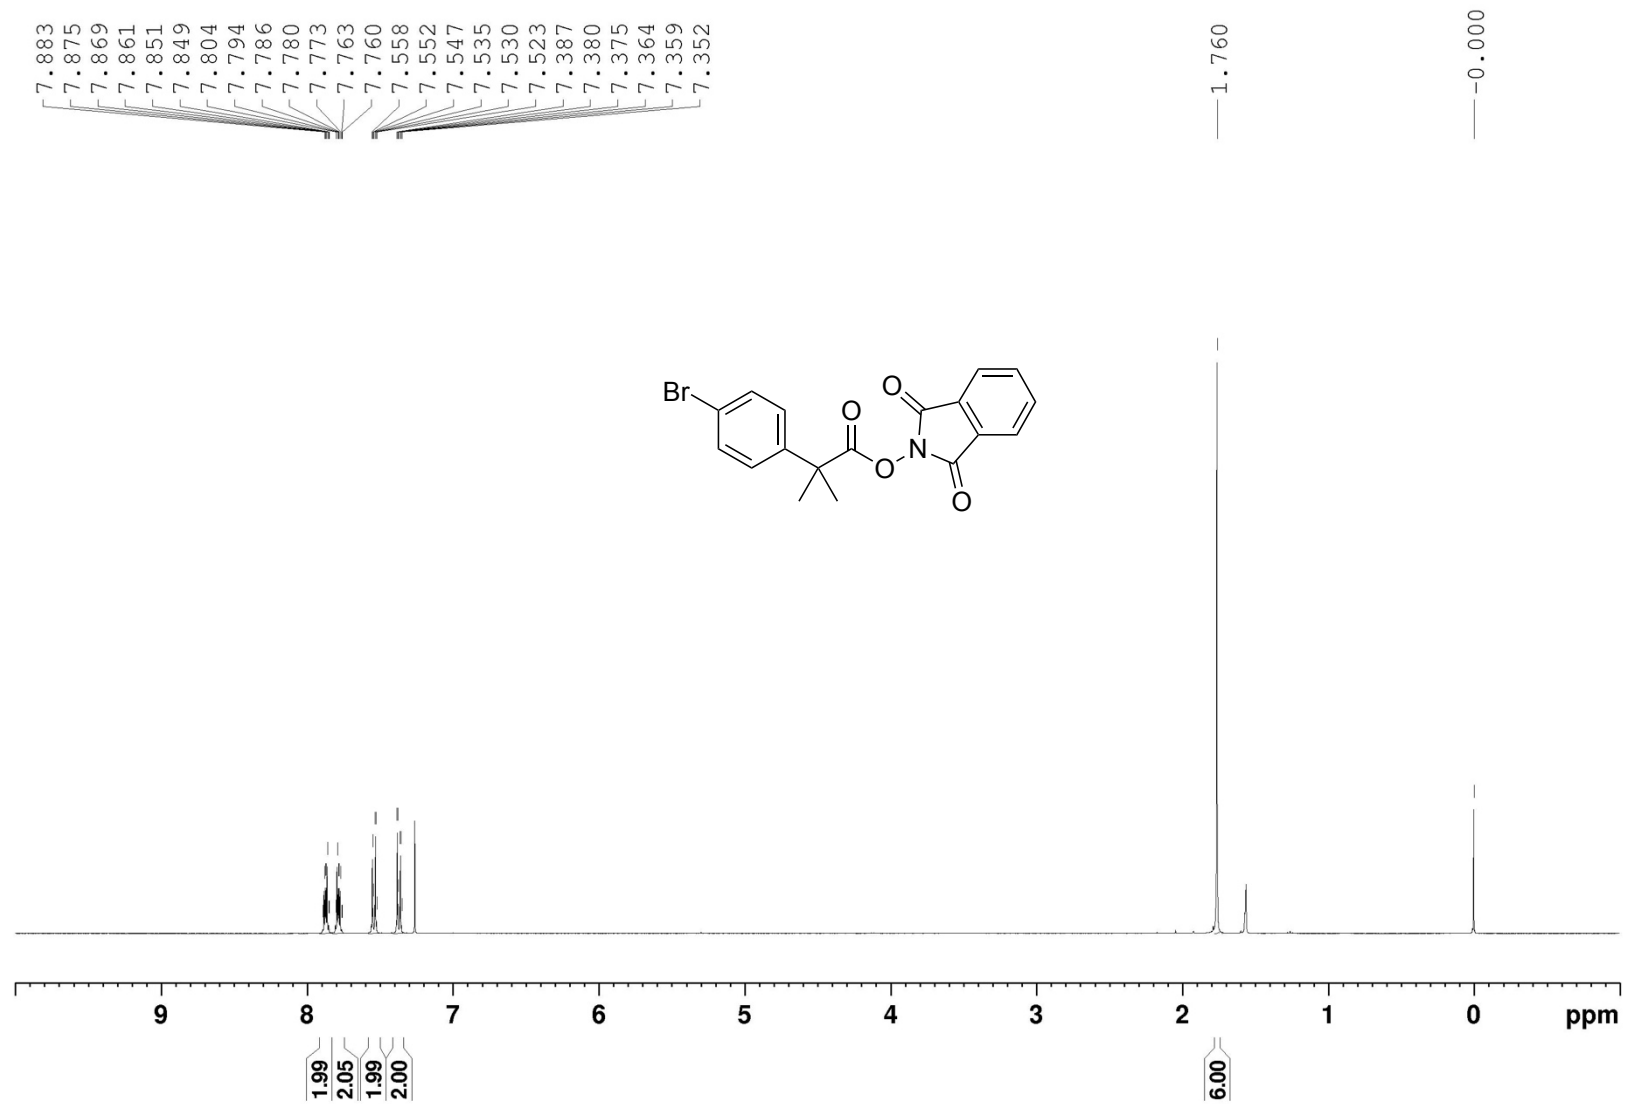

<sup>1</sup>H NMR (400 MHz, CDCl<sub>3</sub>) spectrum of **2b**



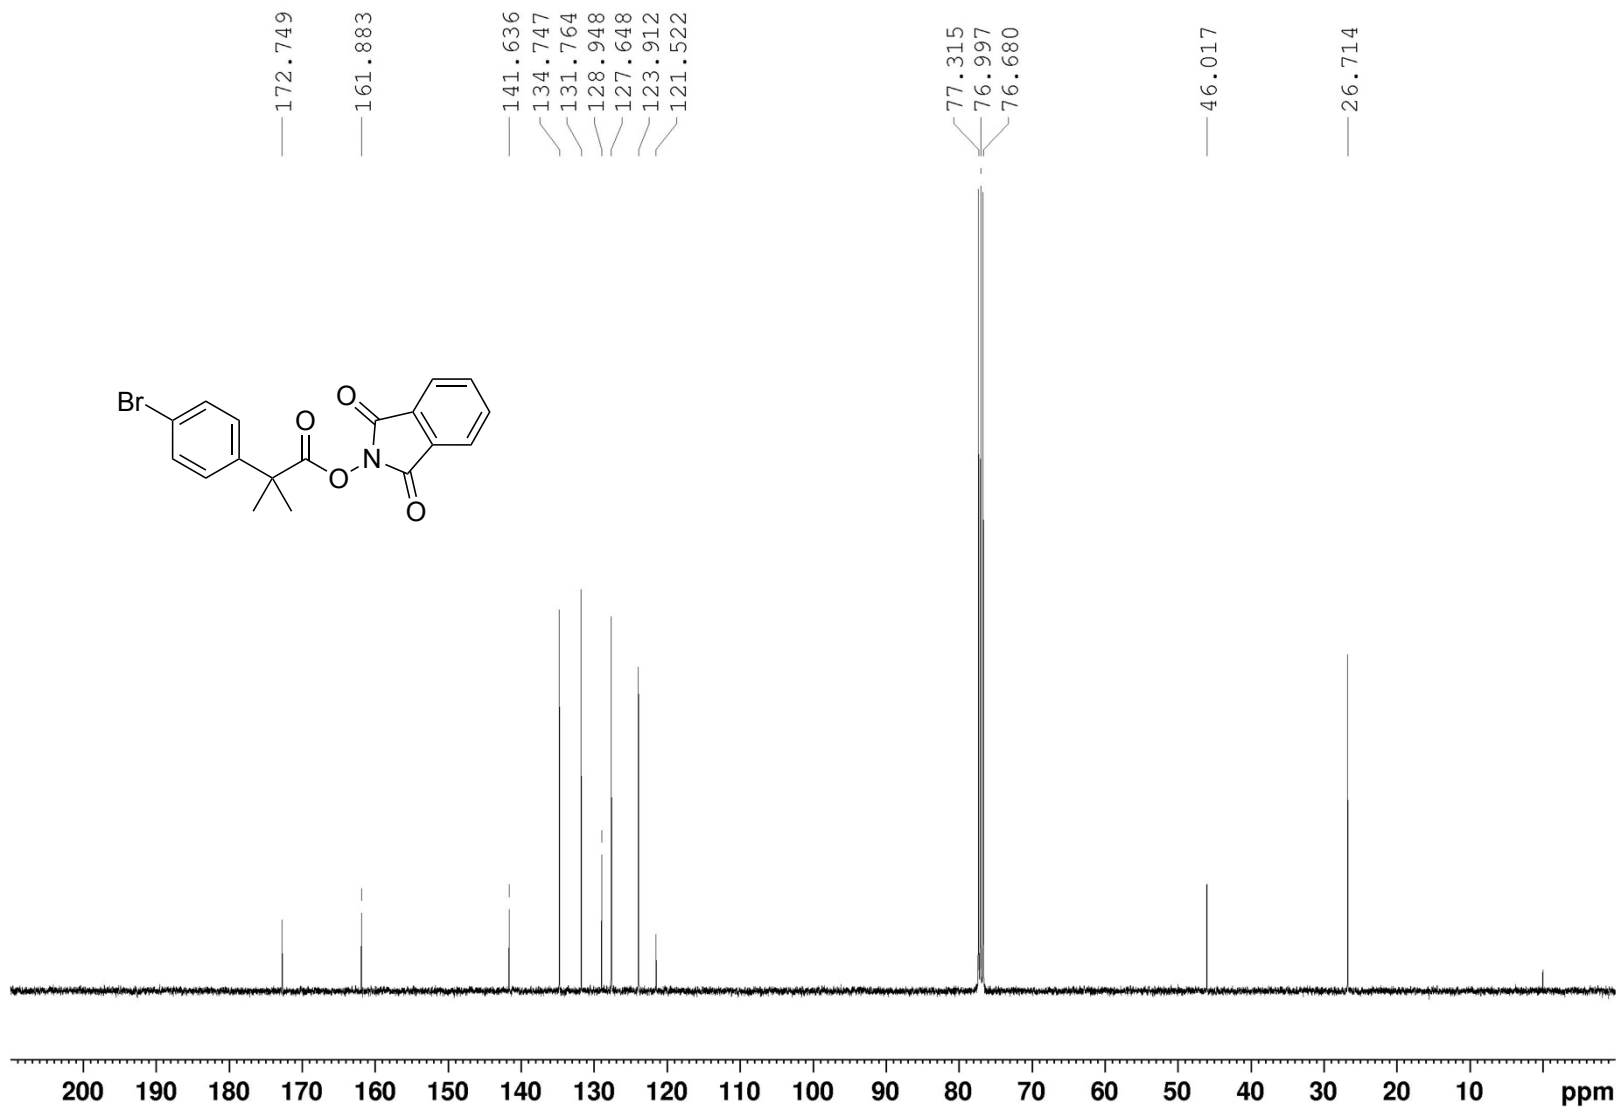

<sup>13</sup>C NMR (100.6 MHz, CDCl<sub>3</sub>) spectrum of **2b**

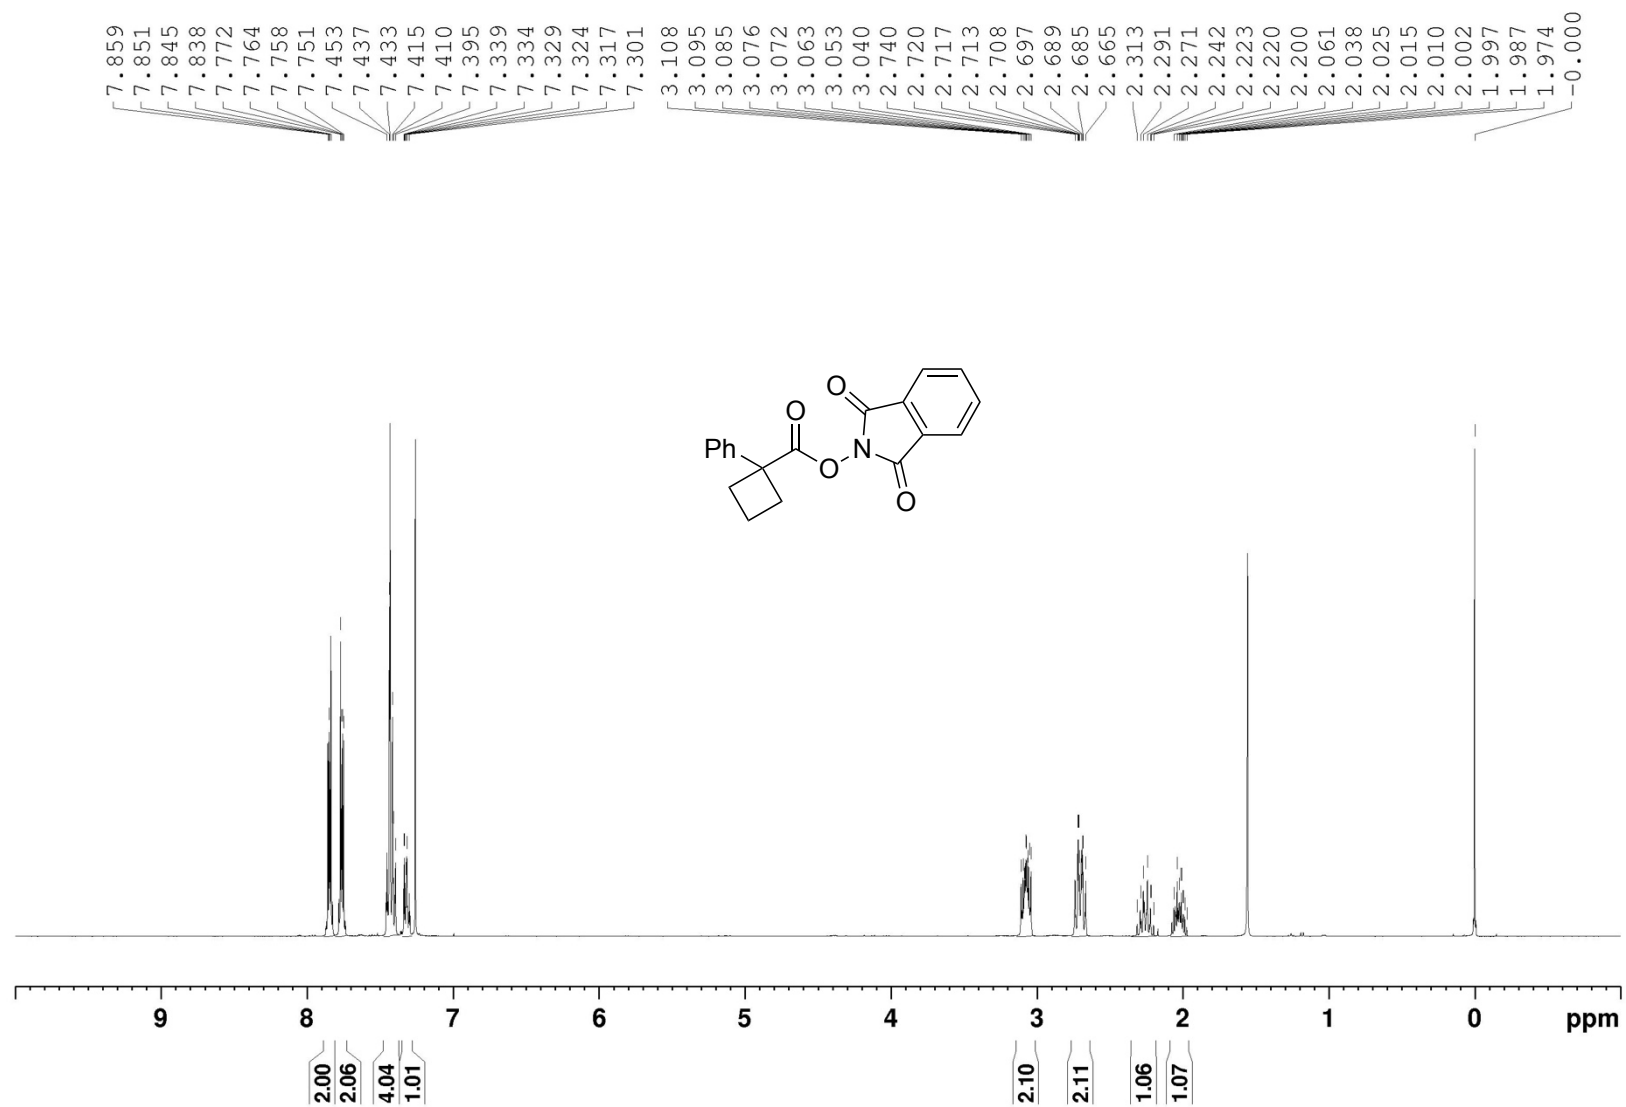

<sup>1</sup>H NMR (400 MHz, CDCl<sub>3</sub>) spectrum of **2c**

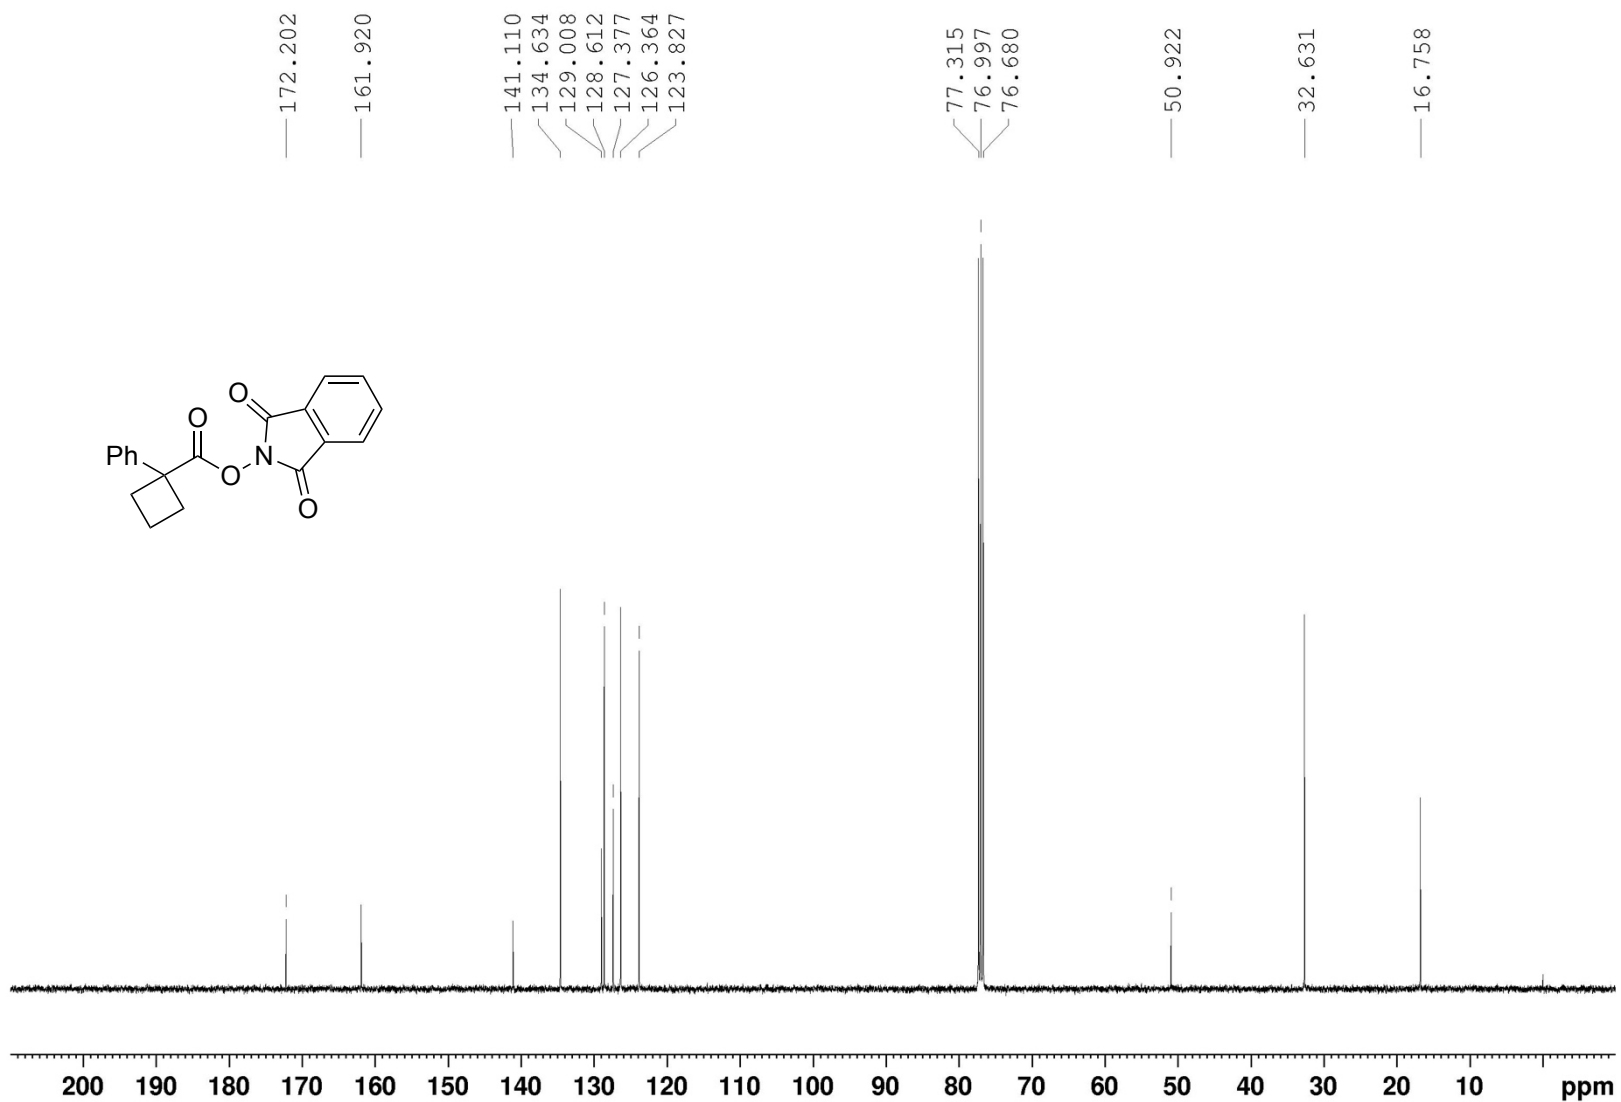

$^{13}\text{C}$  NMR (100.6 MHz,  $\text{CDCl}_3$ ) spectrum of **2c**

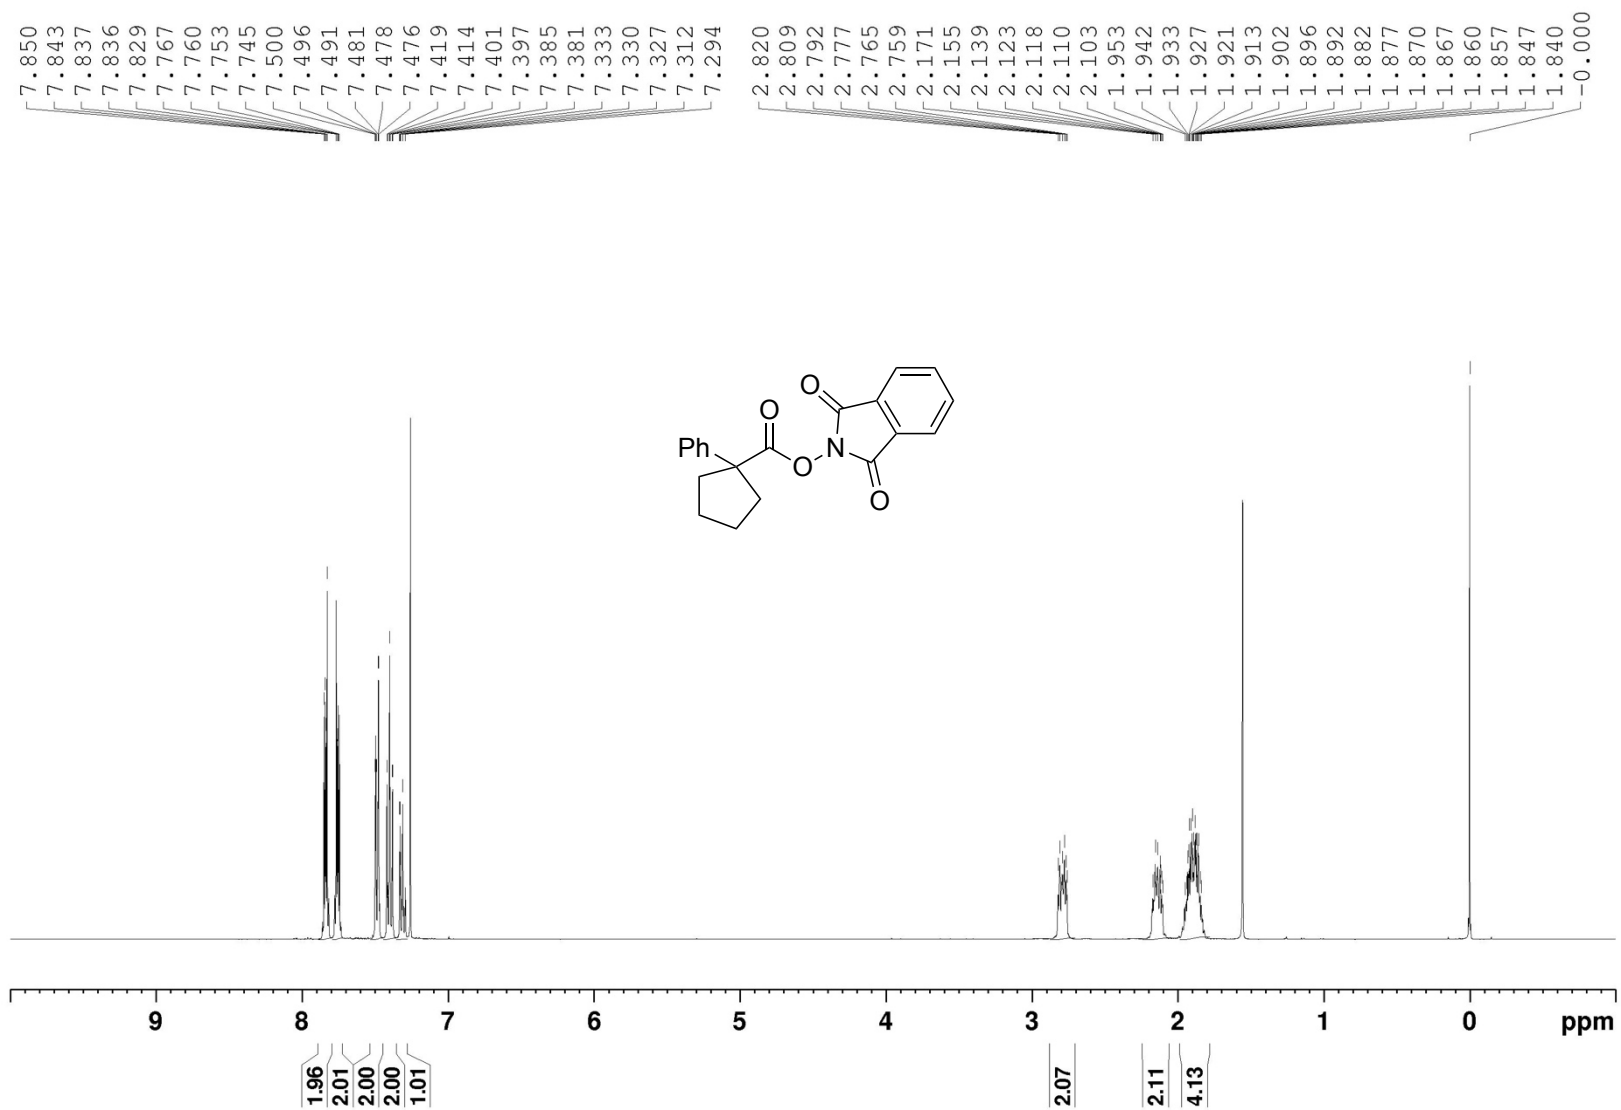

<sup>1</sup>H NMR (400 MHz, CDCl<sub>3</sub>) spectrum of **2d**

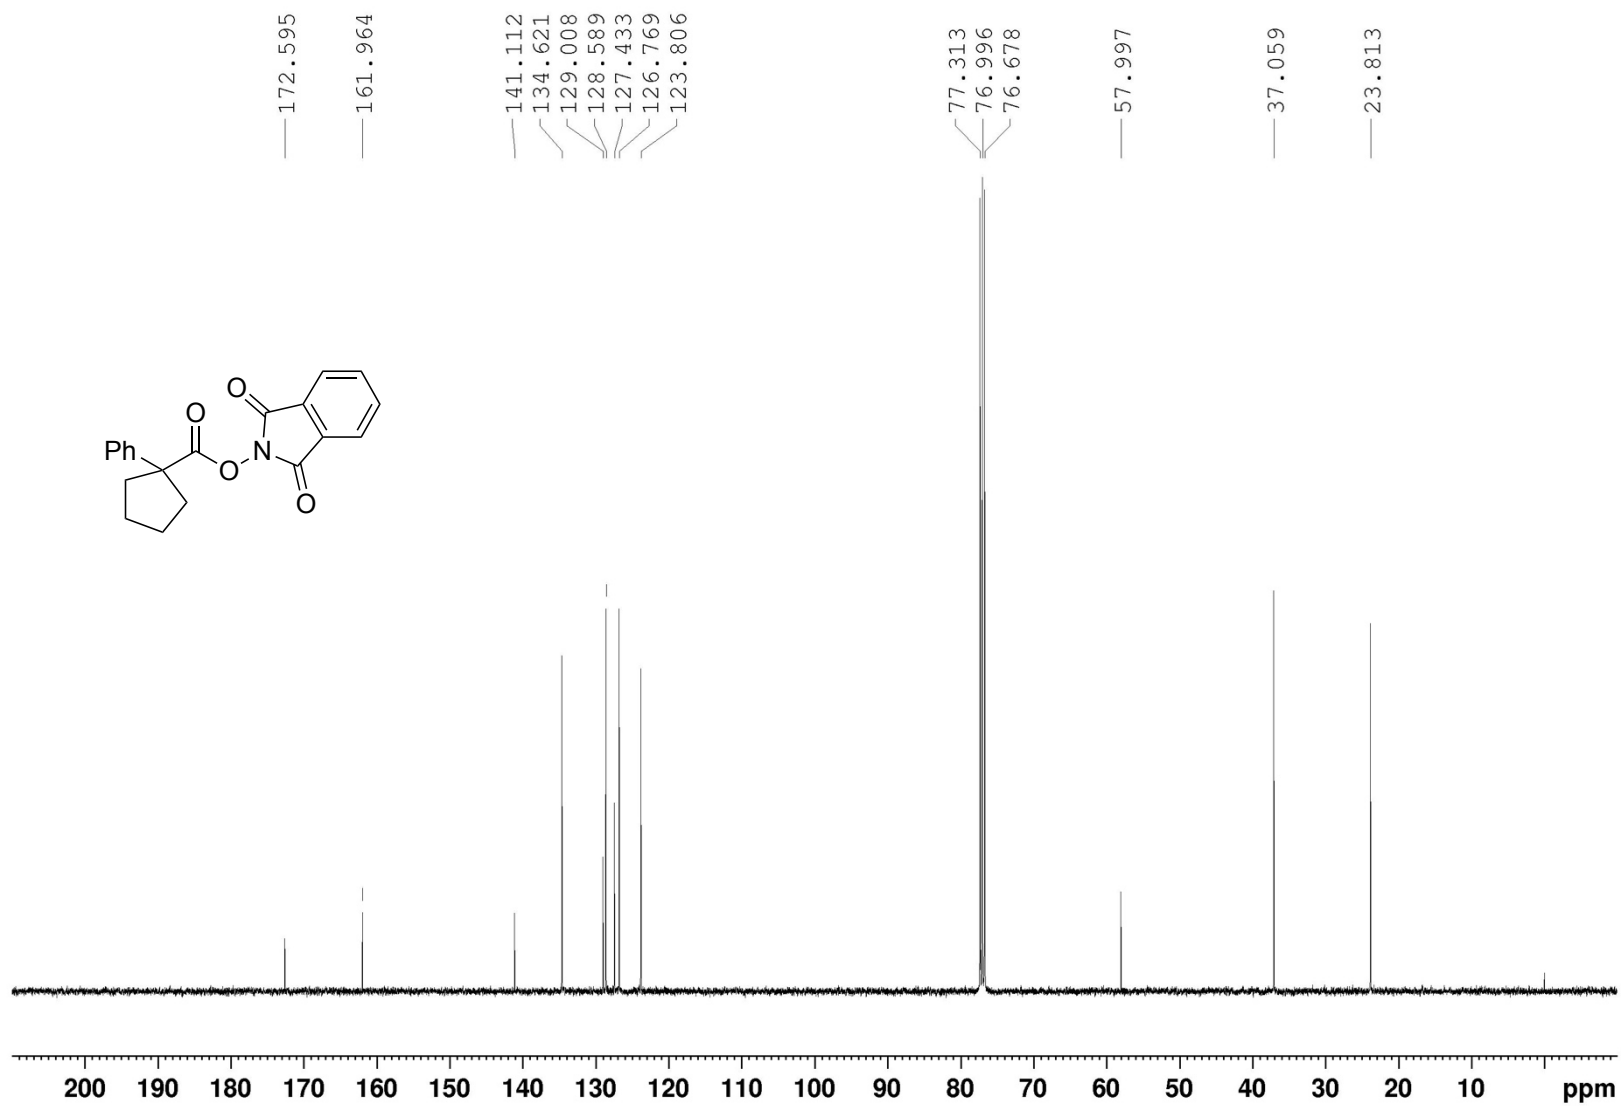

$^{13}\text{C}$  NMR (100.6 MHz,  $\text{CDCl}_3$ ) spectrum of **2d**

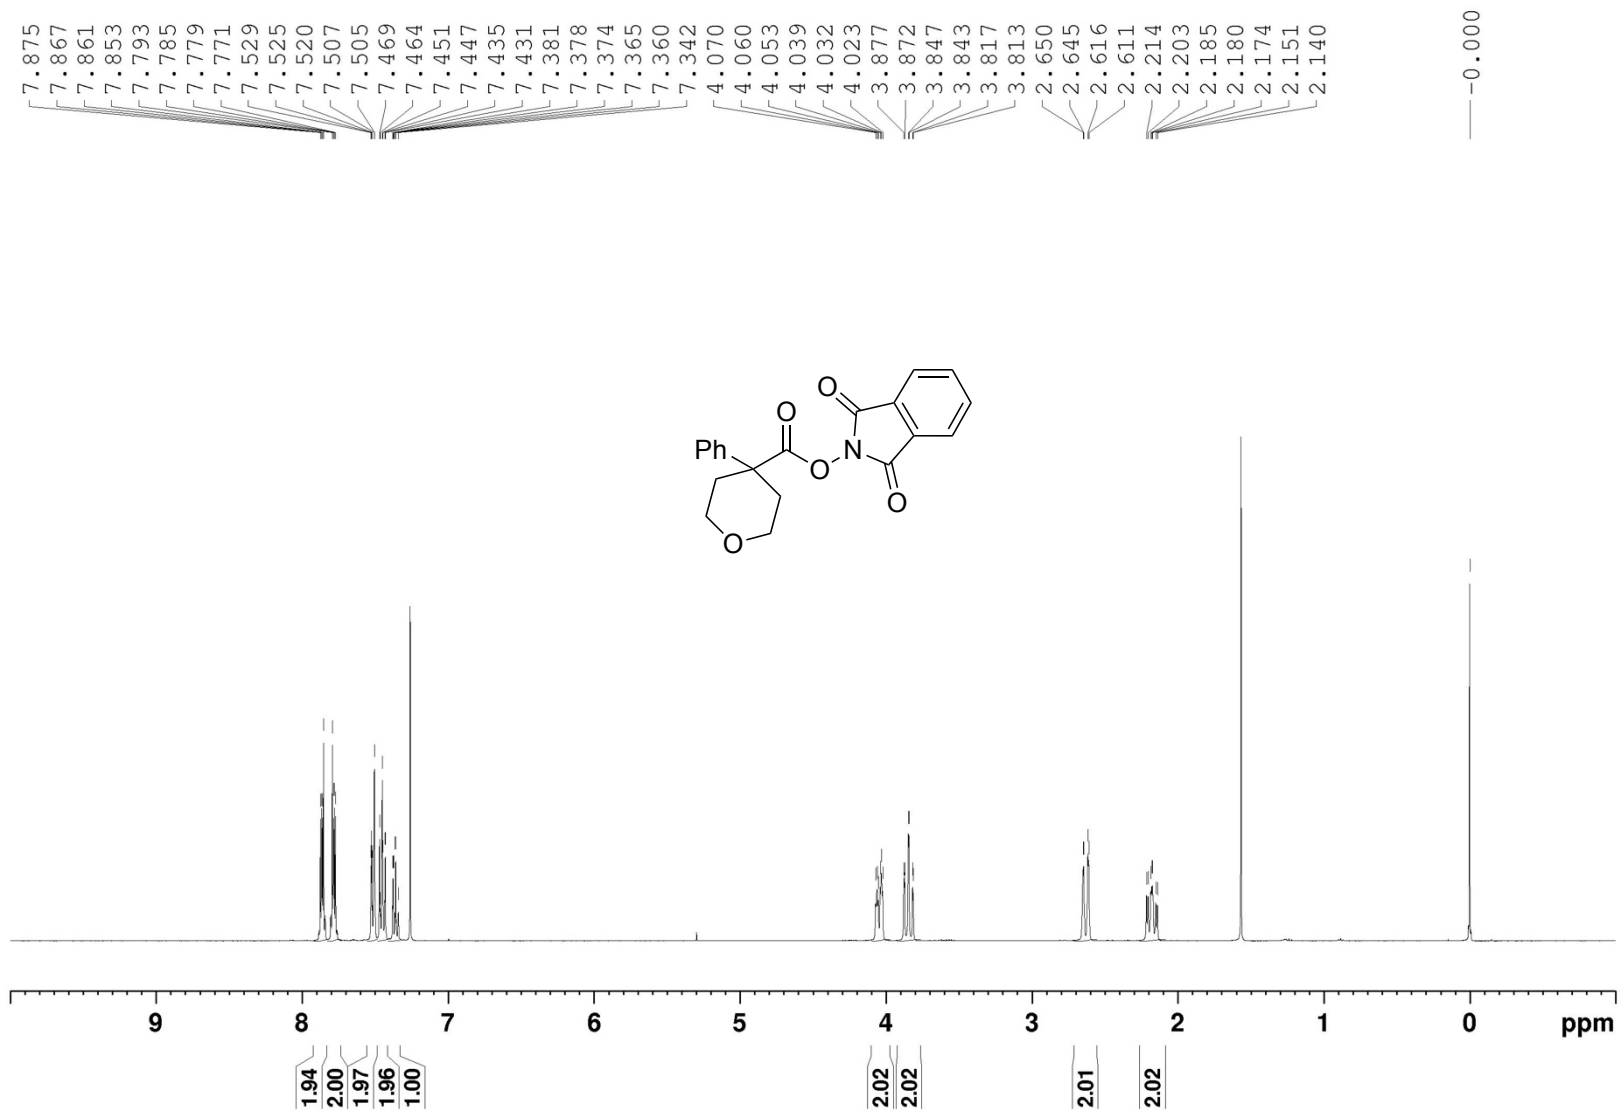

<sup>1</sup>H NMR (400 MHz, CDCl<sub>3</sub>) spectrum of **2e**

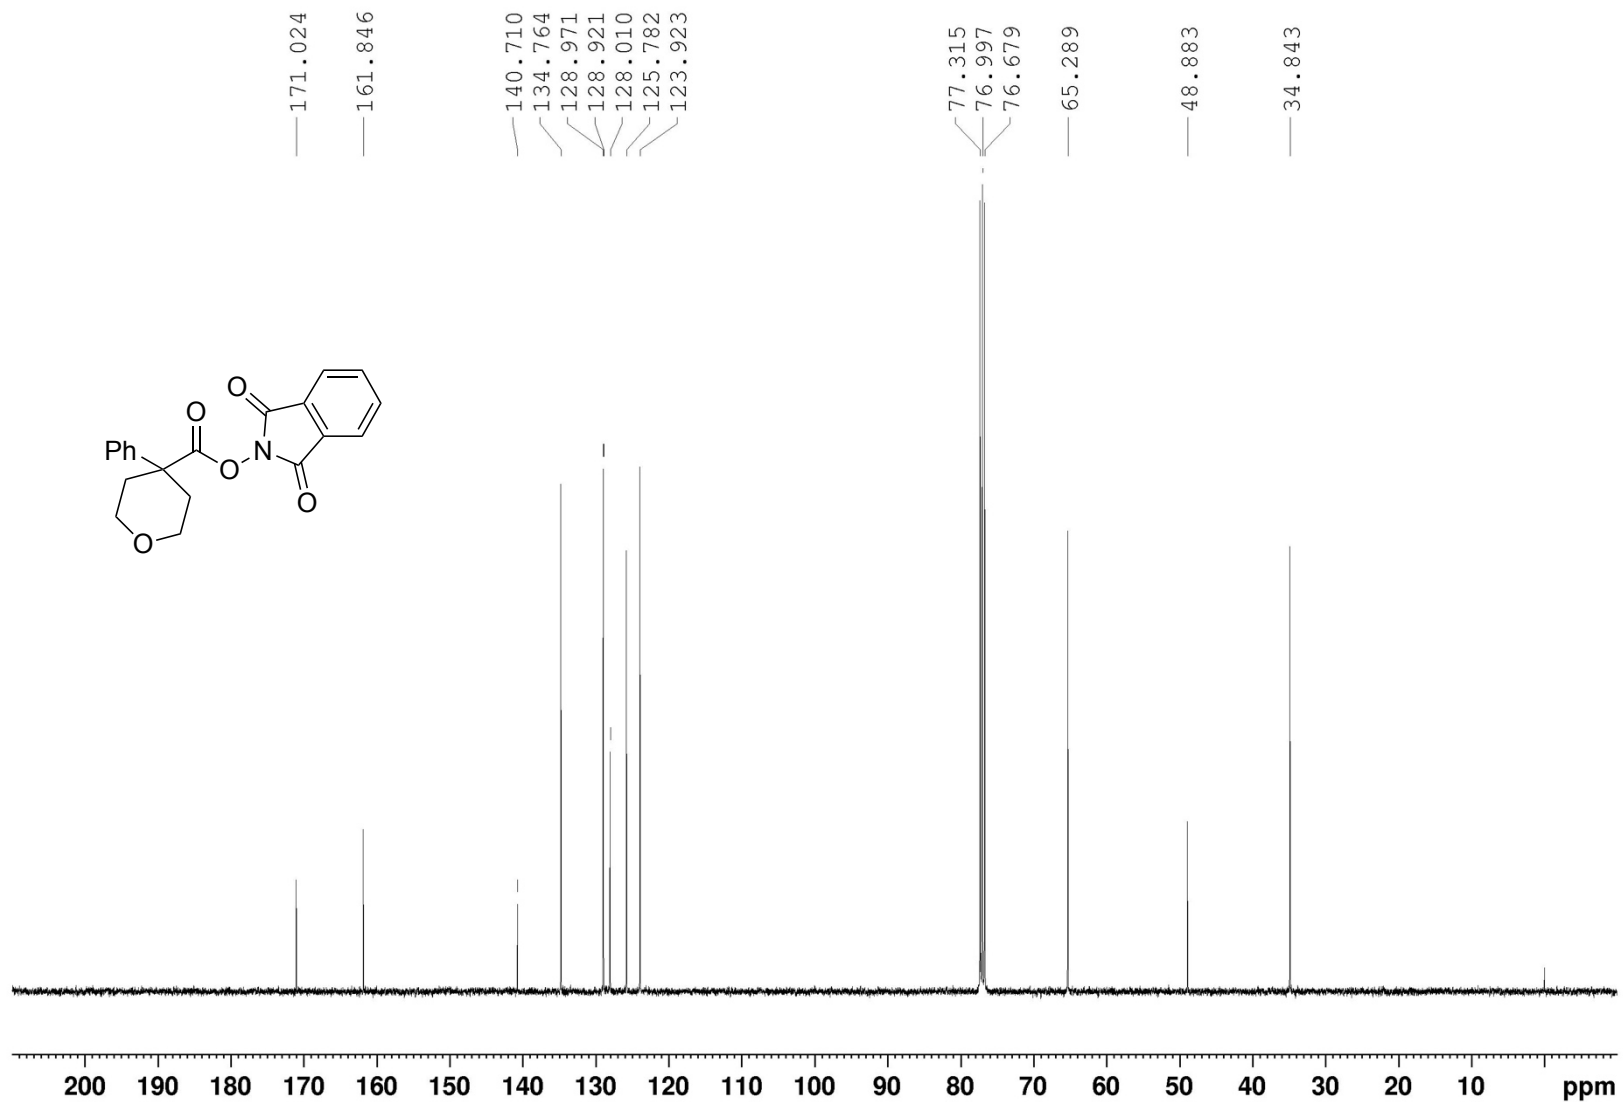

$^{13}\text{C}$  NMR (100.6 MHz,  $\text{CDCl}_3$ ) spectrum of **2e**

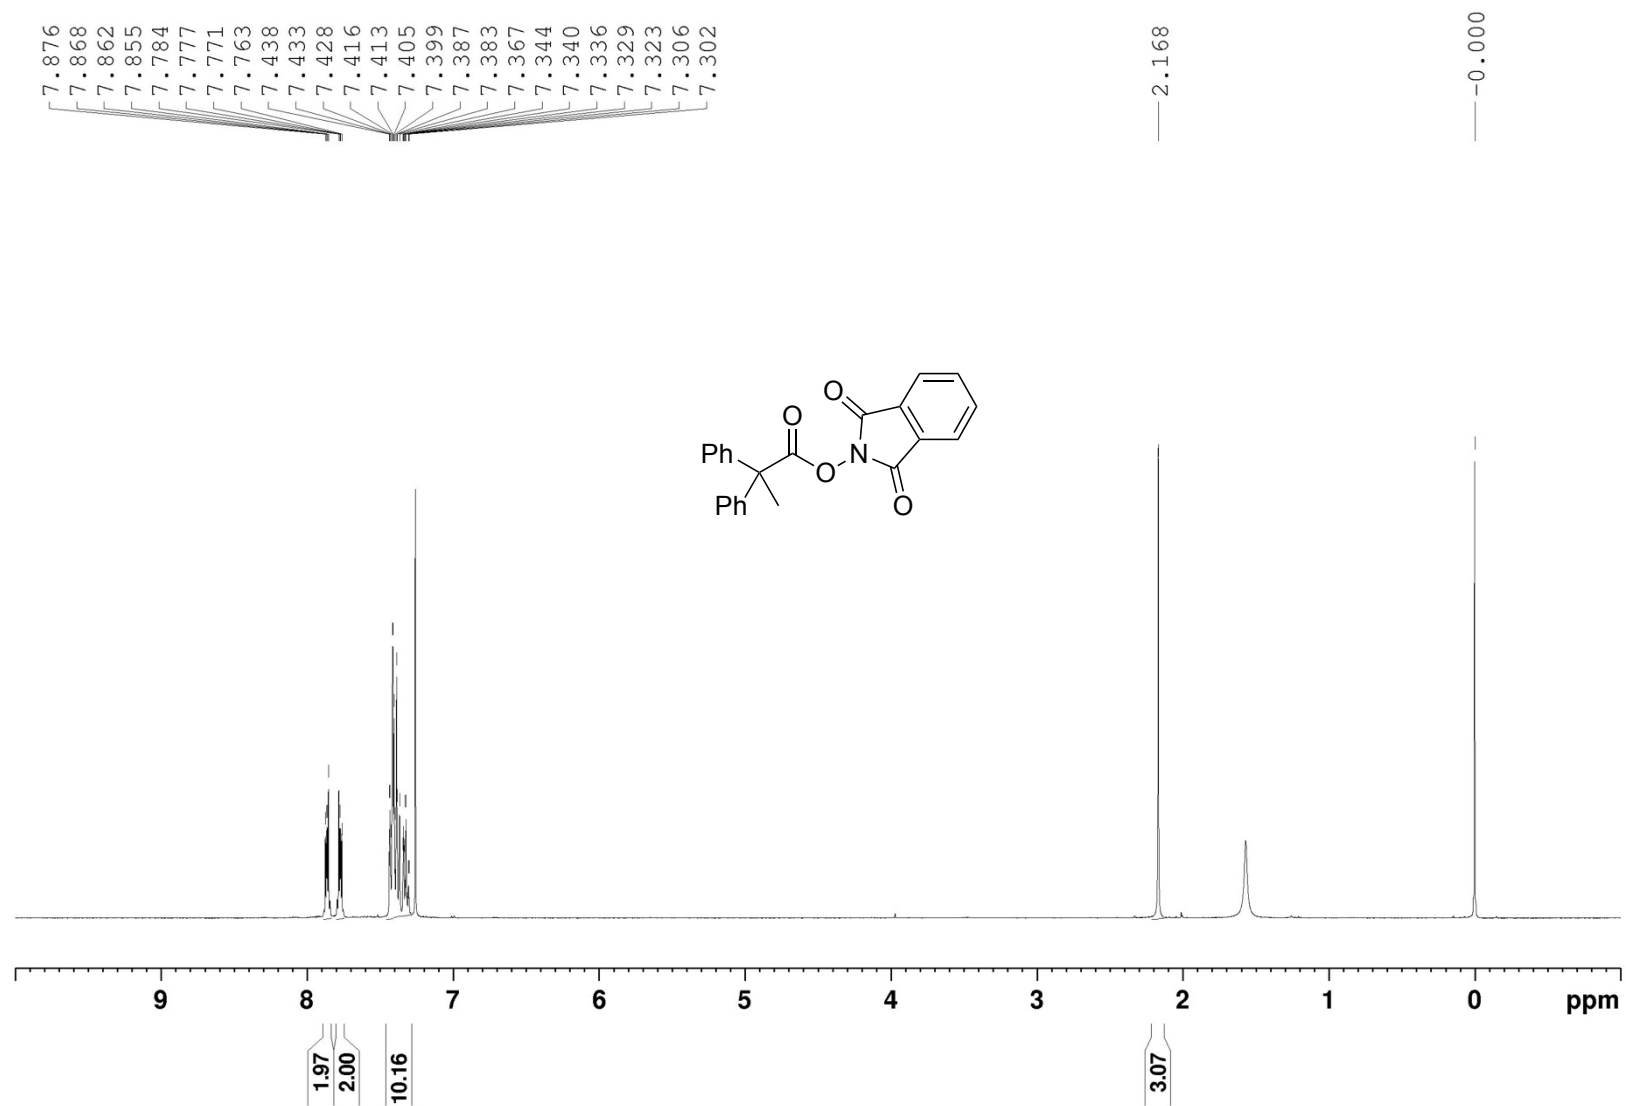

<sup>1</sup>H NMR (400 MHz, CDCl<sub>3</sub>) spectrum of **2g**



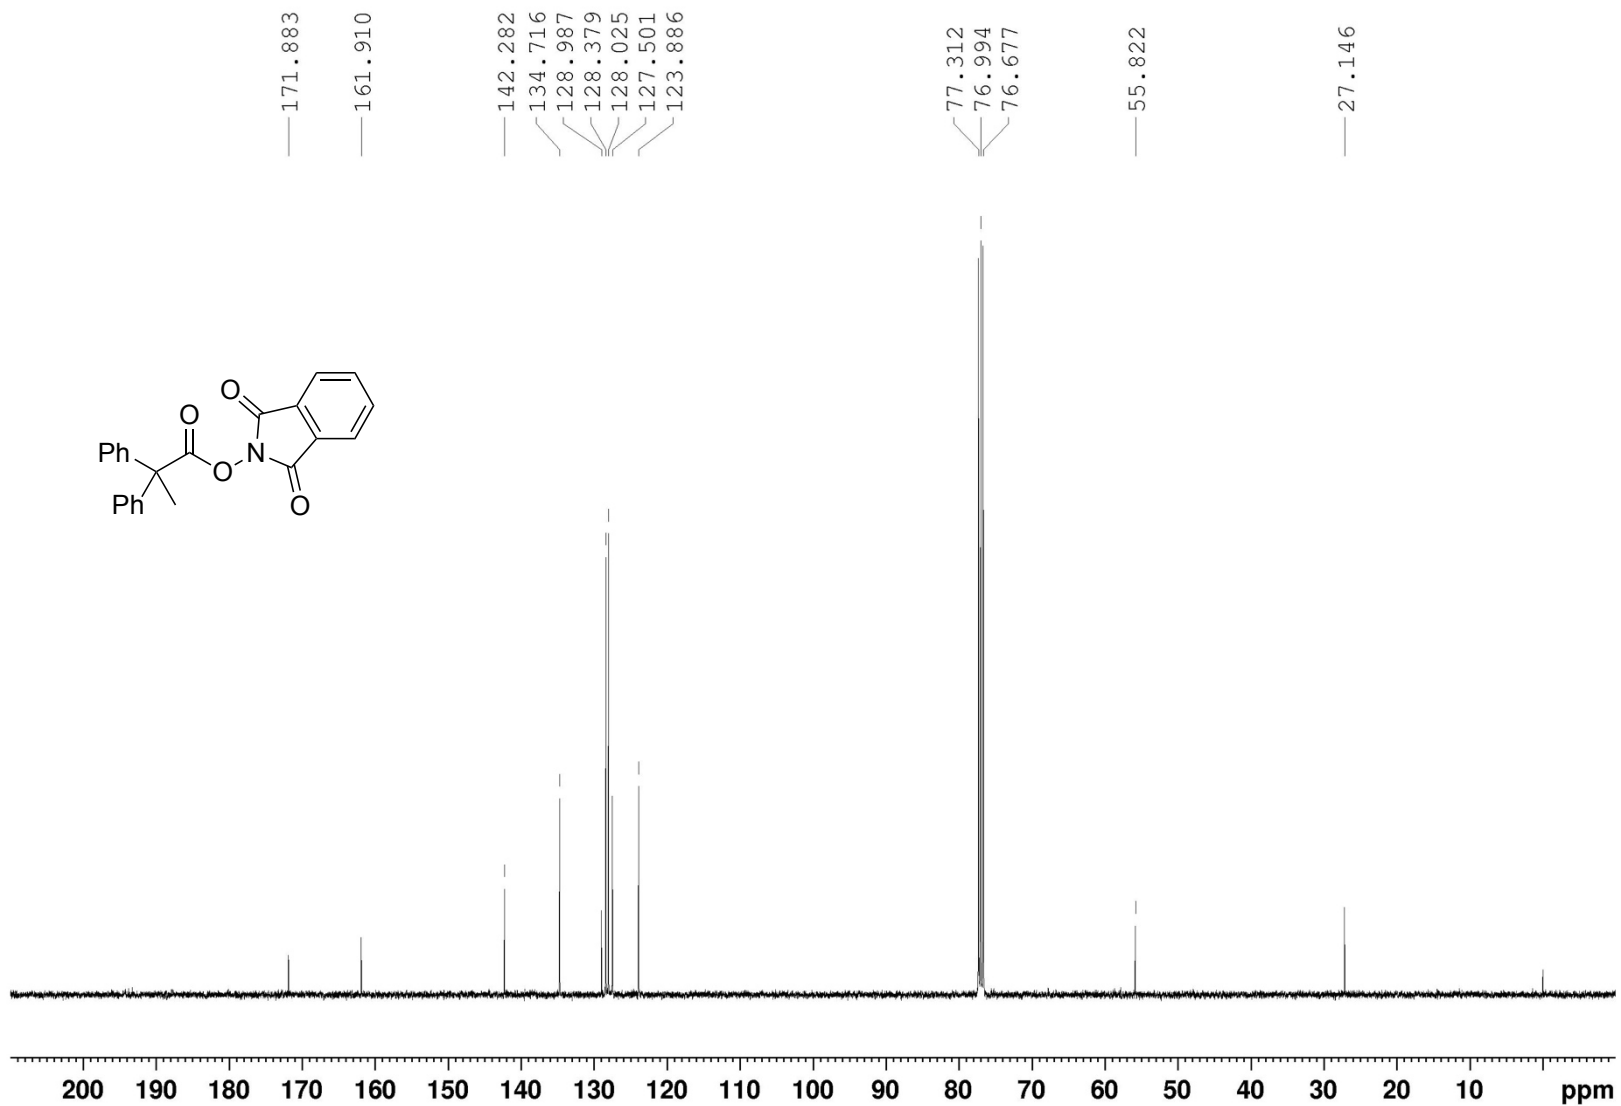

<sup>13</sup>C NMR (100.6 MHz, CDCl<sub>3</sub>) spectrum of **2g**

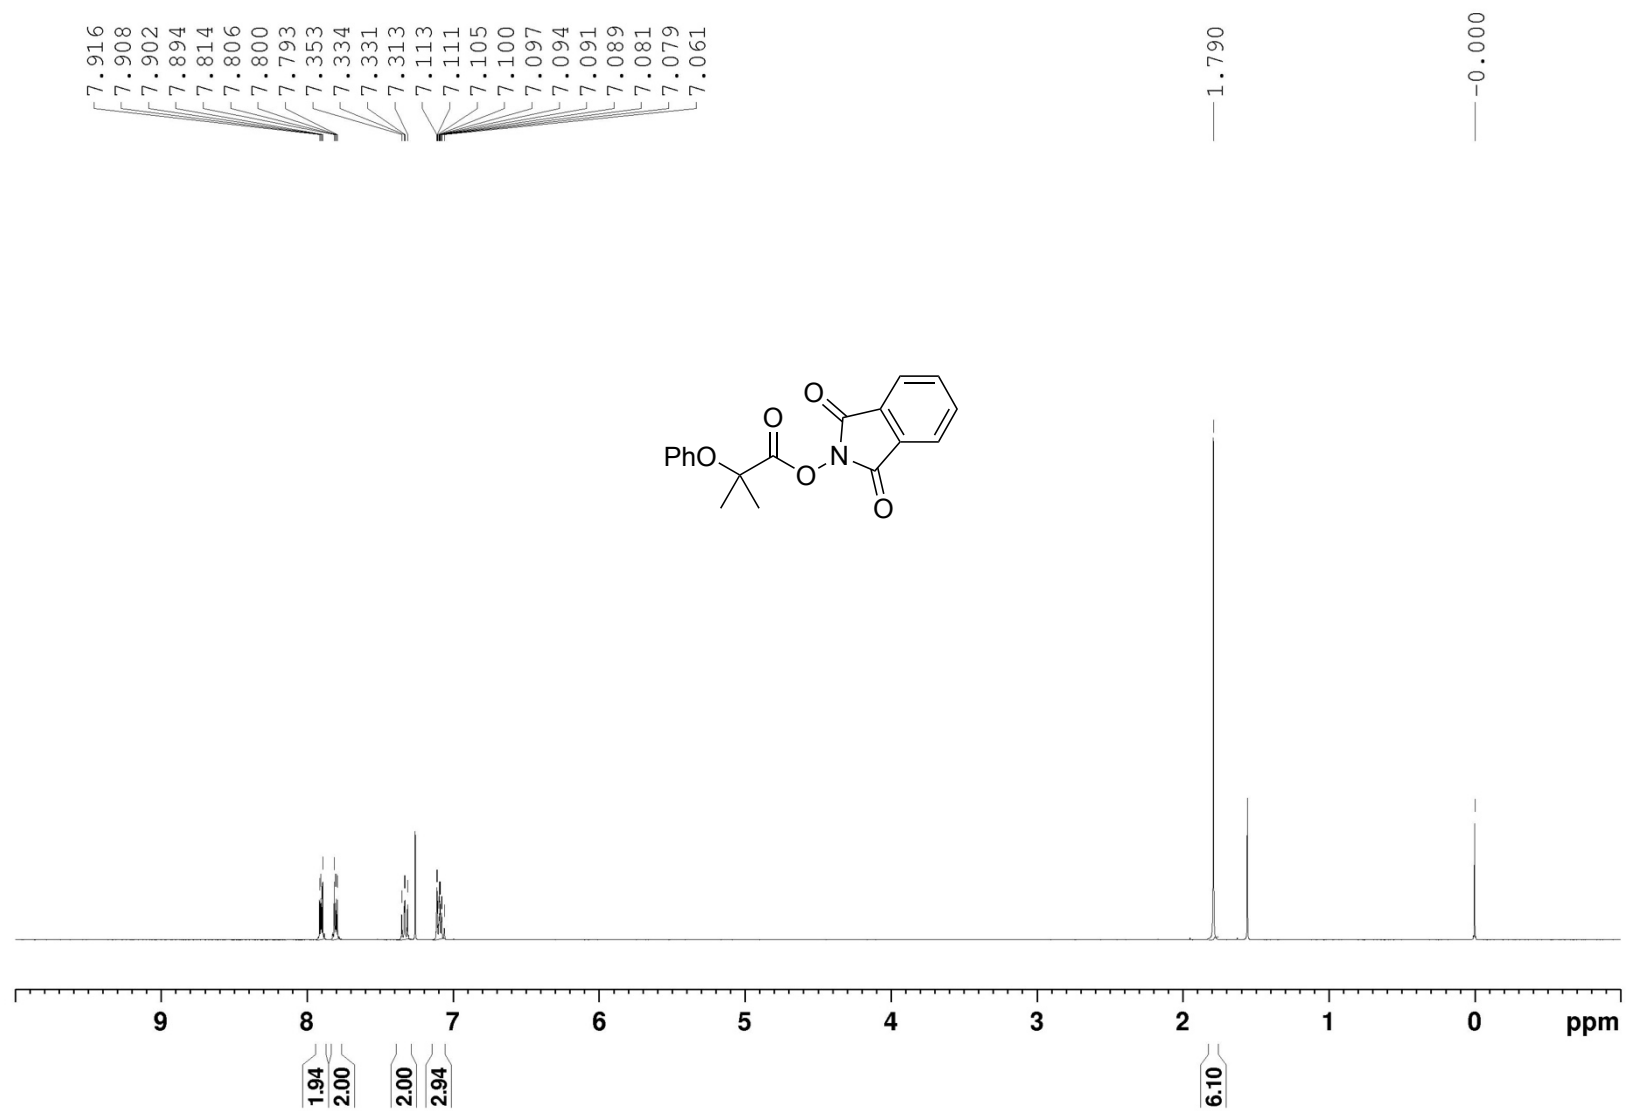

$^1\text{H}$  NMR (400 MHz,  $\text{CDCl}_3$ ) spectrum of **2j**

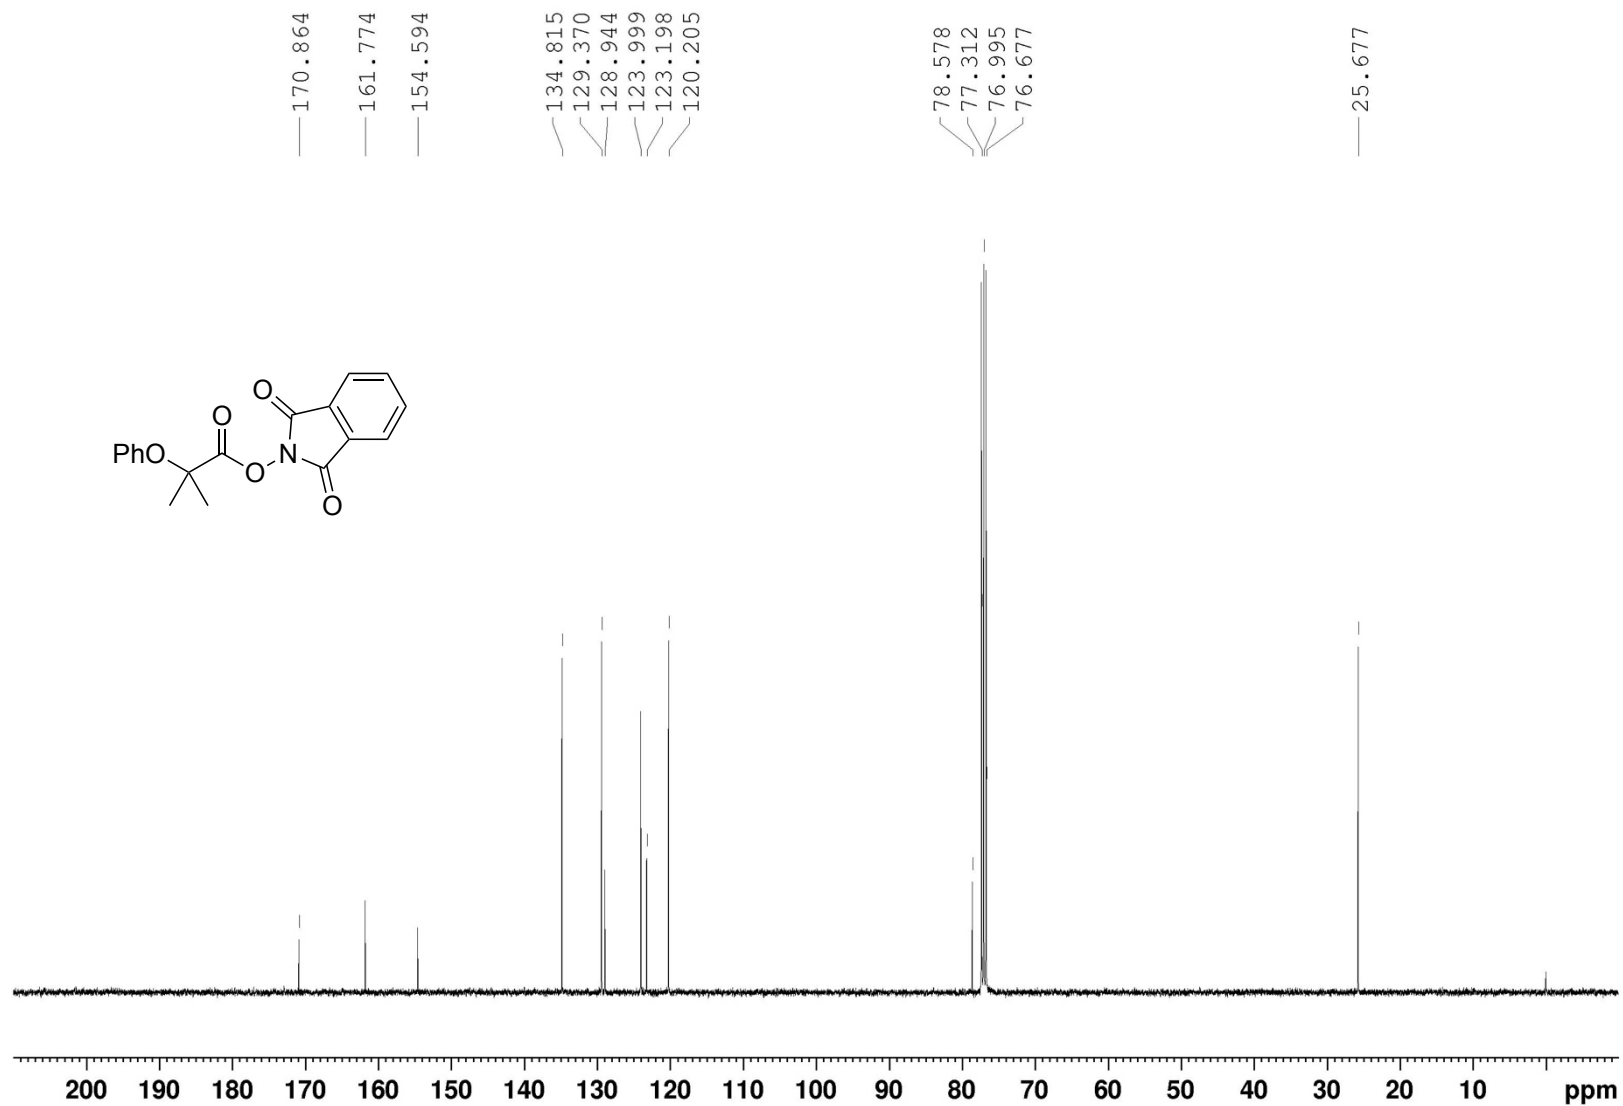

$^{13}\text{C}$  NMR (100.6 MHz,  $\text{CDCl}_3$ ) spectrum of **2j**

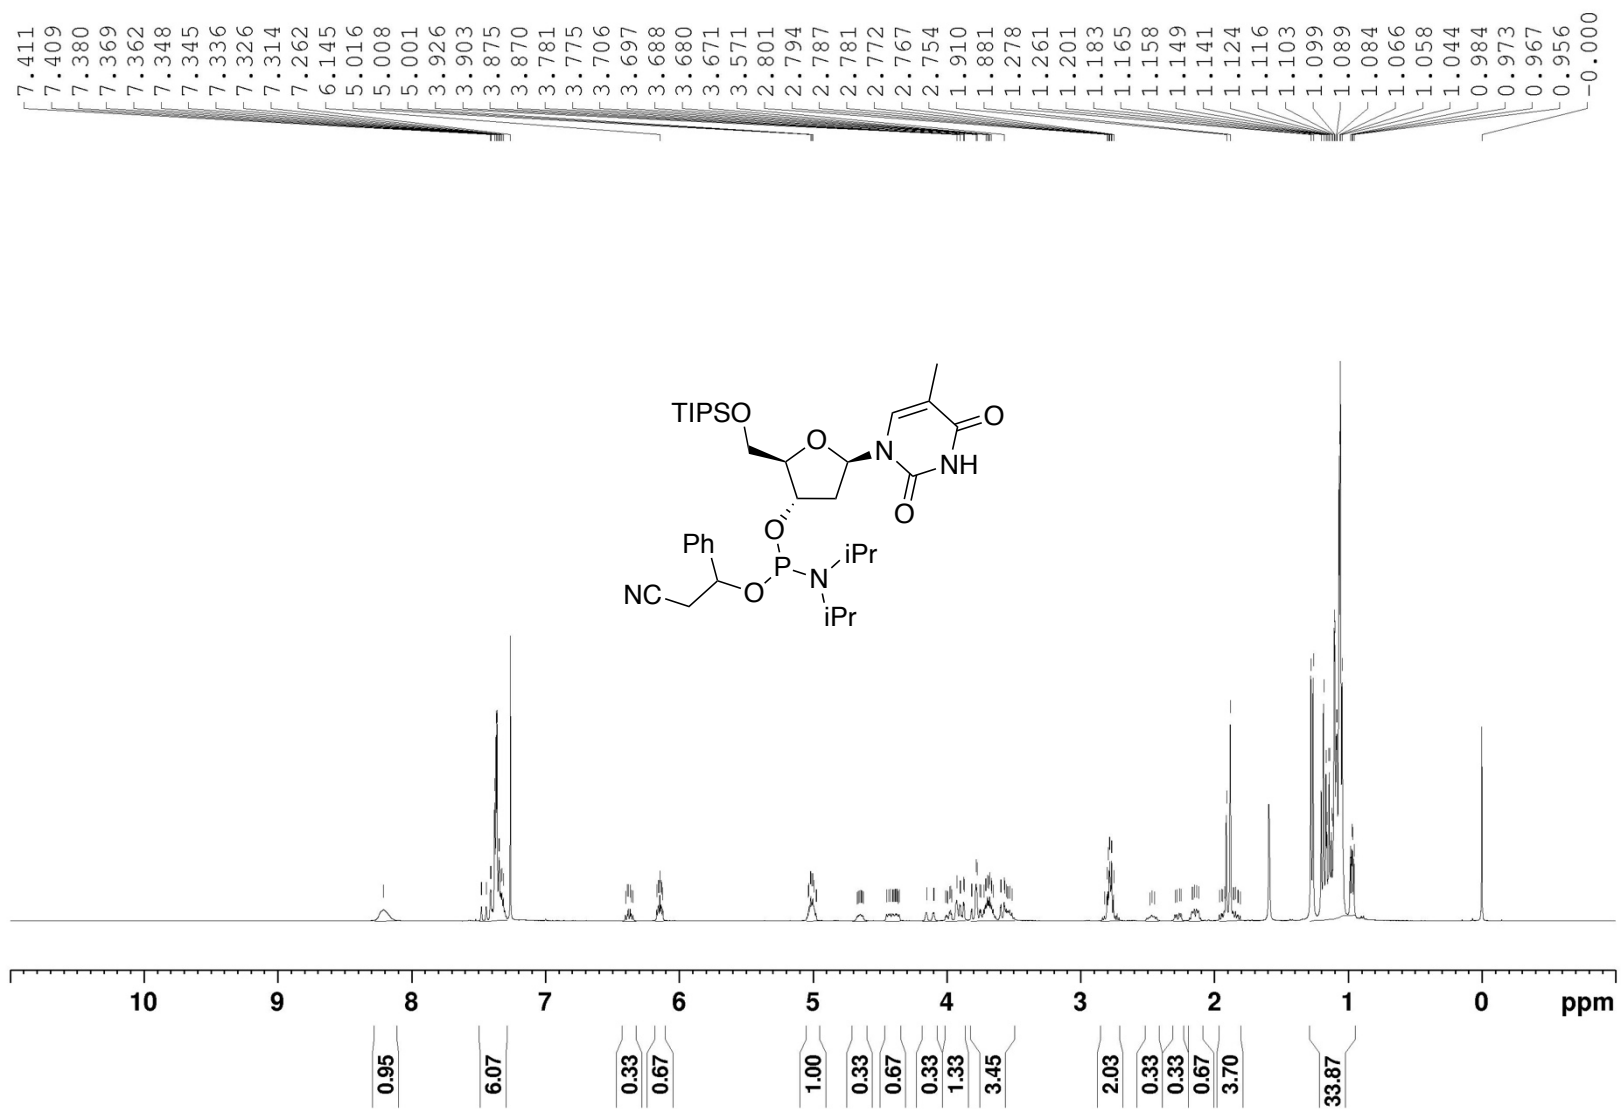

<sup>1</sup>H NMR (400 MHz, CDCl<sub>3</sub>) spectrum of S3-1

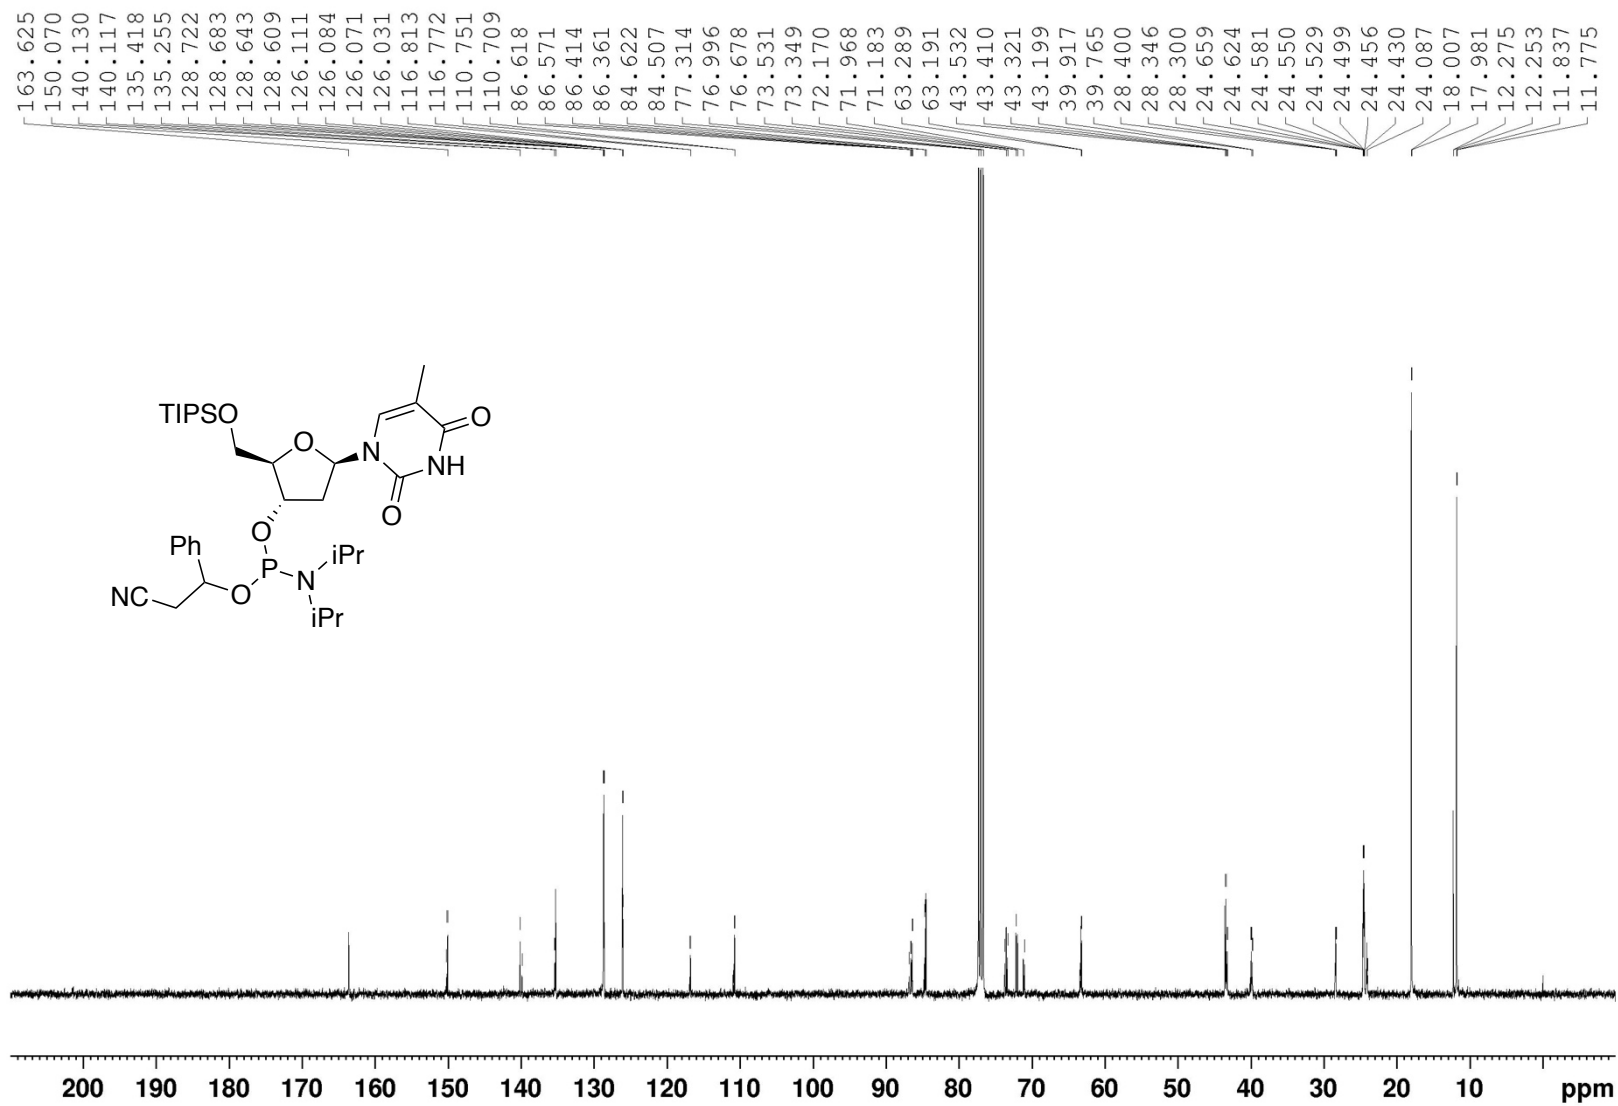

$^{13}\text{C}$  NMR (100.6 MHz,  $\text{CDCl}_3$ ) spectrum of **S3-1**

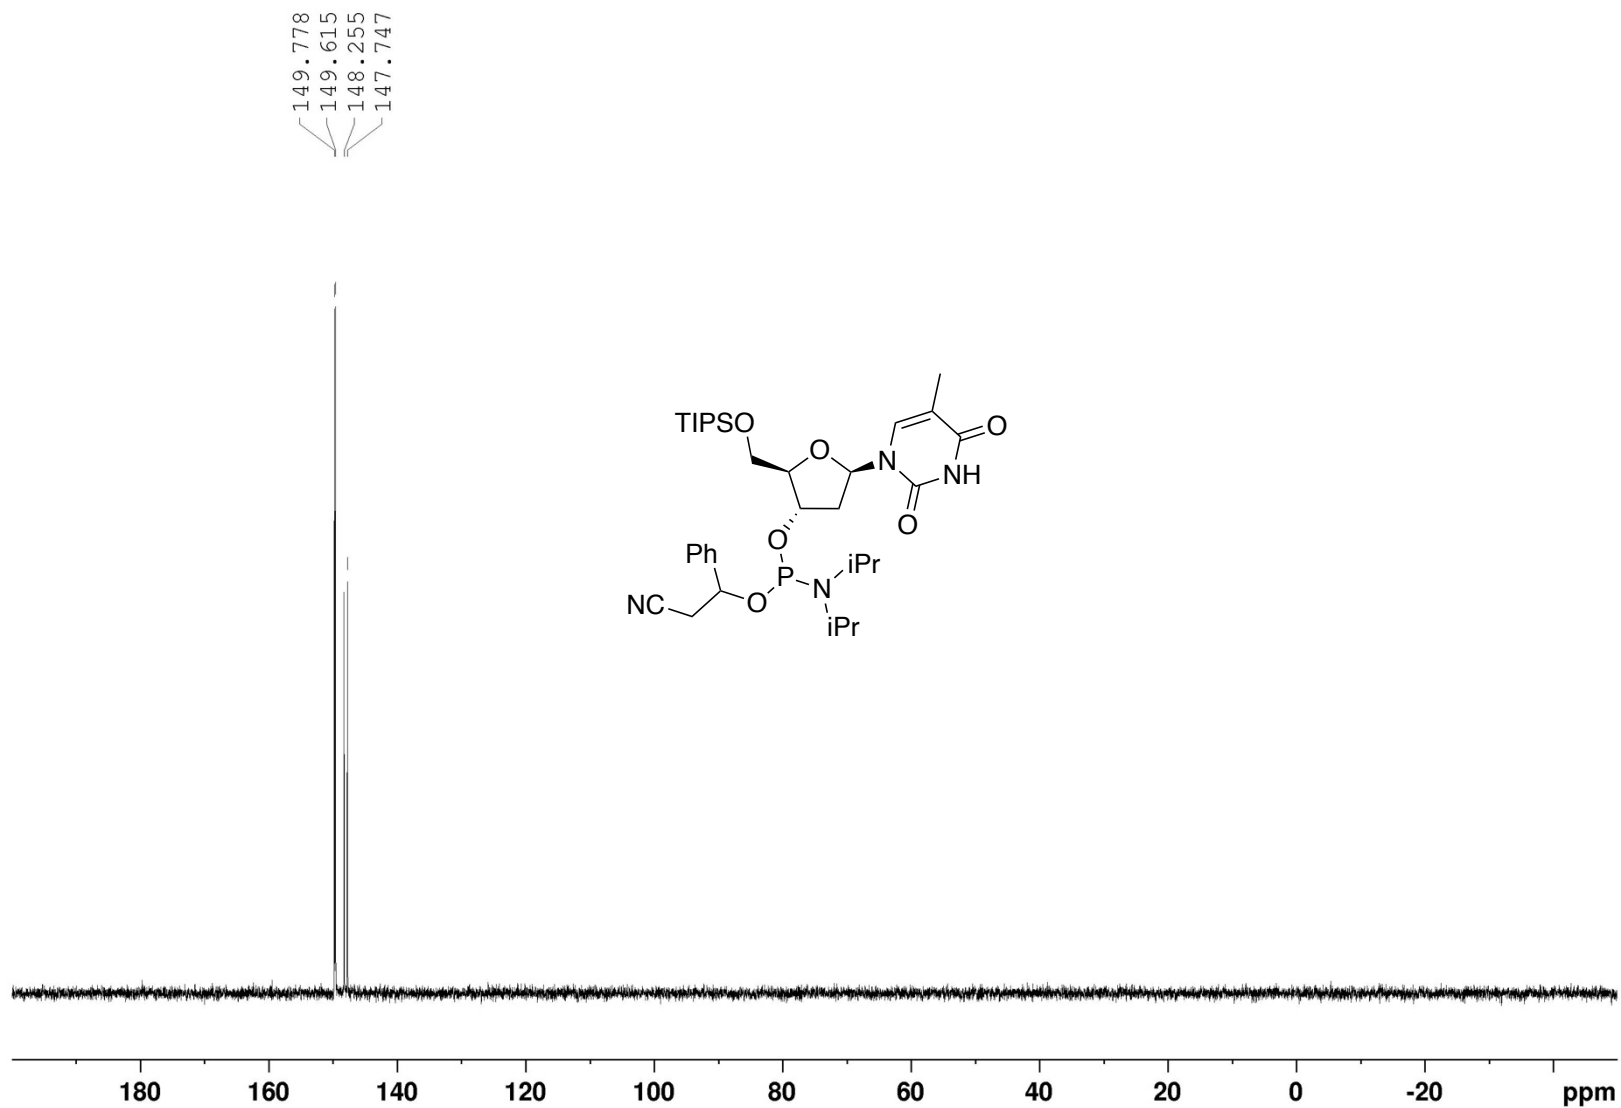

$^{31}\text{P}$  NMR (162 MHz,  $\text{CDCl}_3$ ) spectrum of **S3-1**

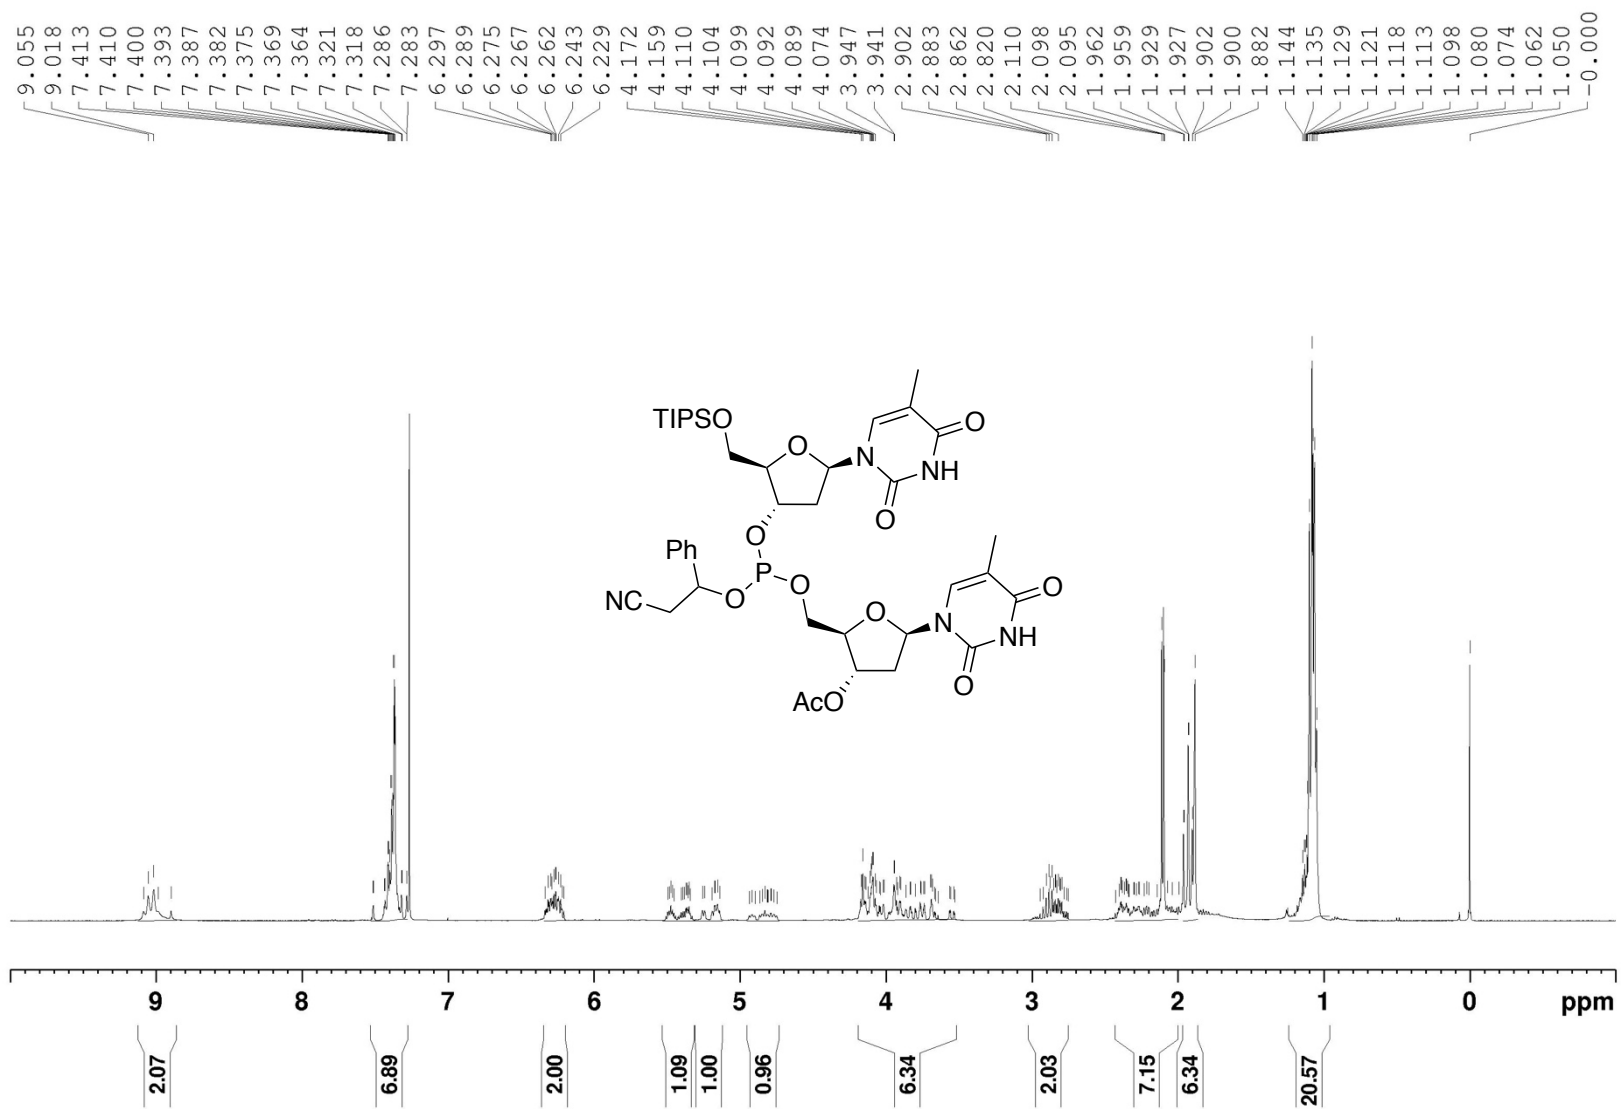

<sup>1</sup>H NMR (400 MHz, CDCl<sub>3</sub>) spectrum of **1a-1**

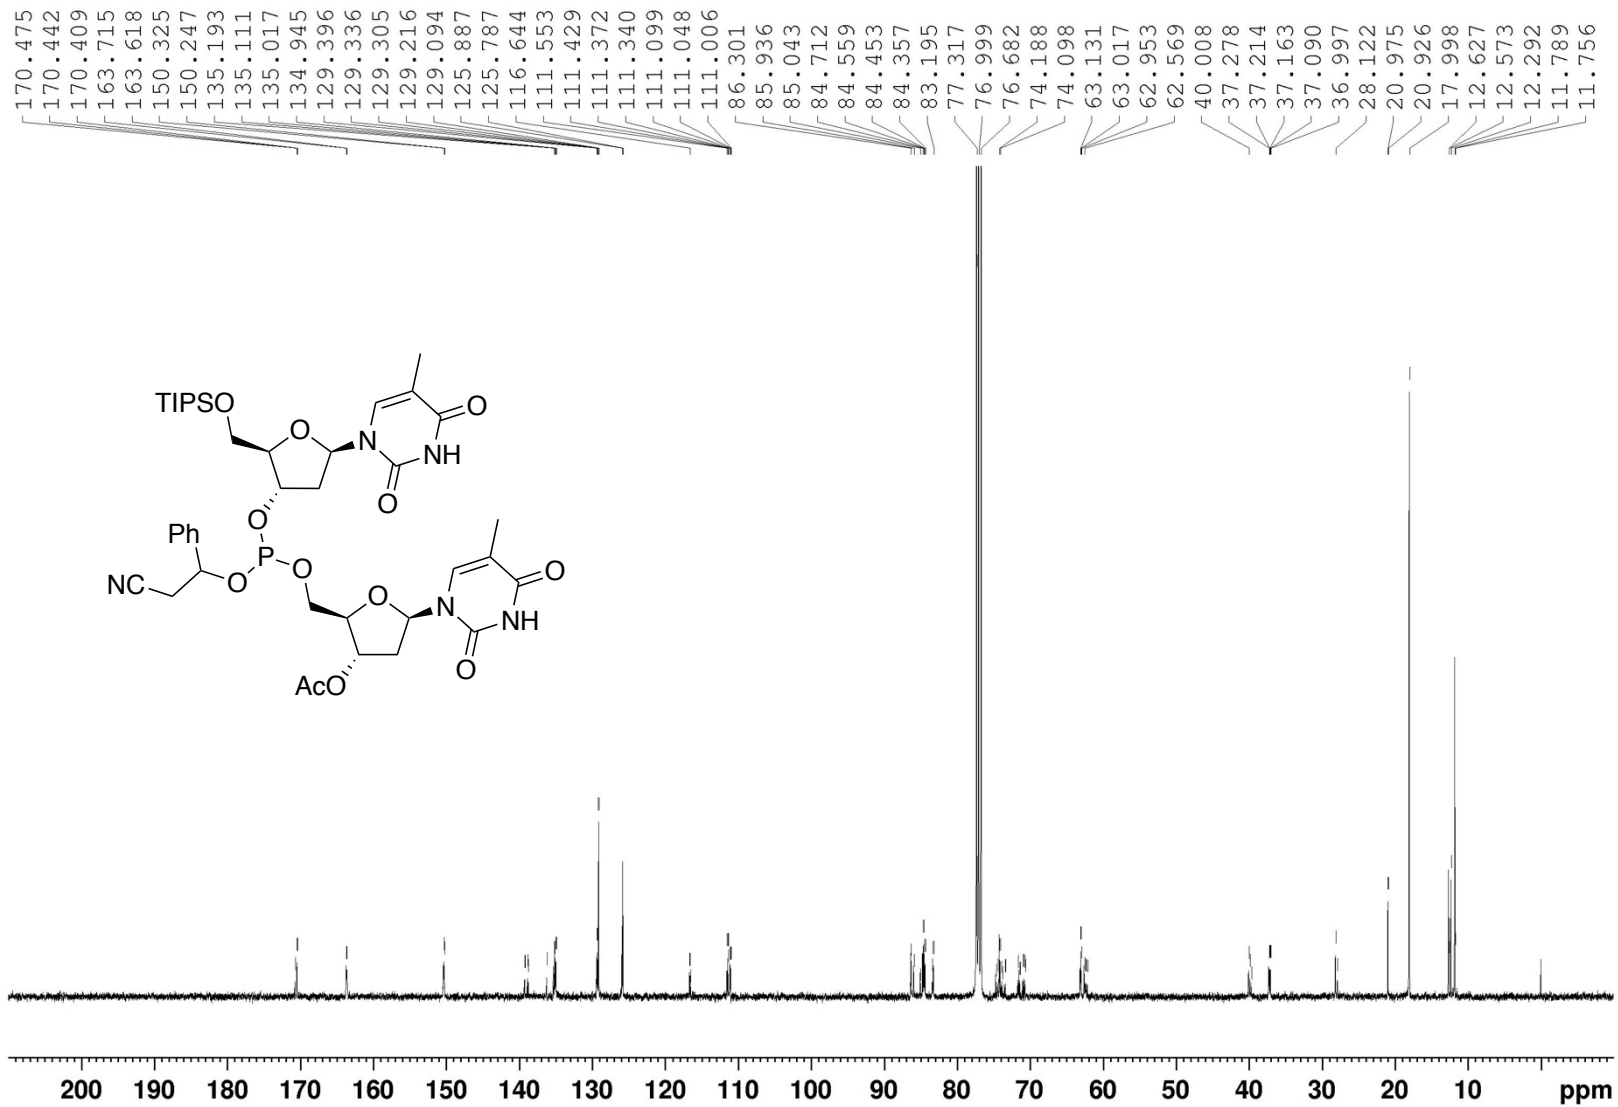

<sup>13</sup>C NMR (100.6 MHz, CDCl<sub>3</sub>) spectrum of **1a-1**



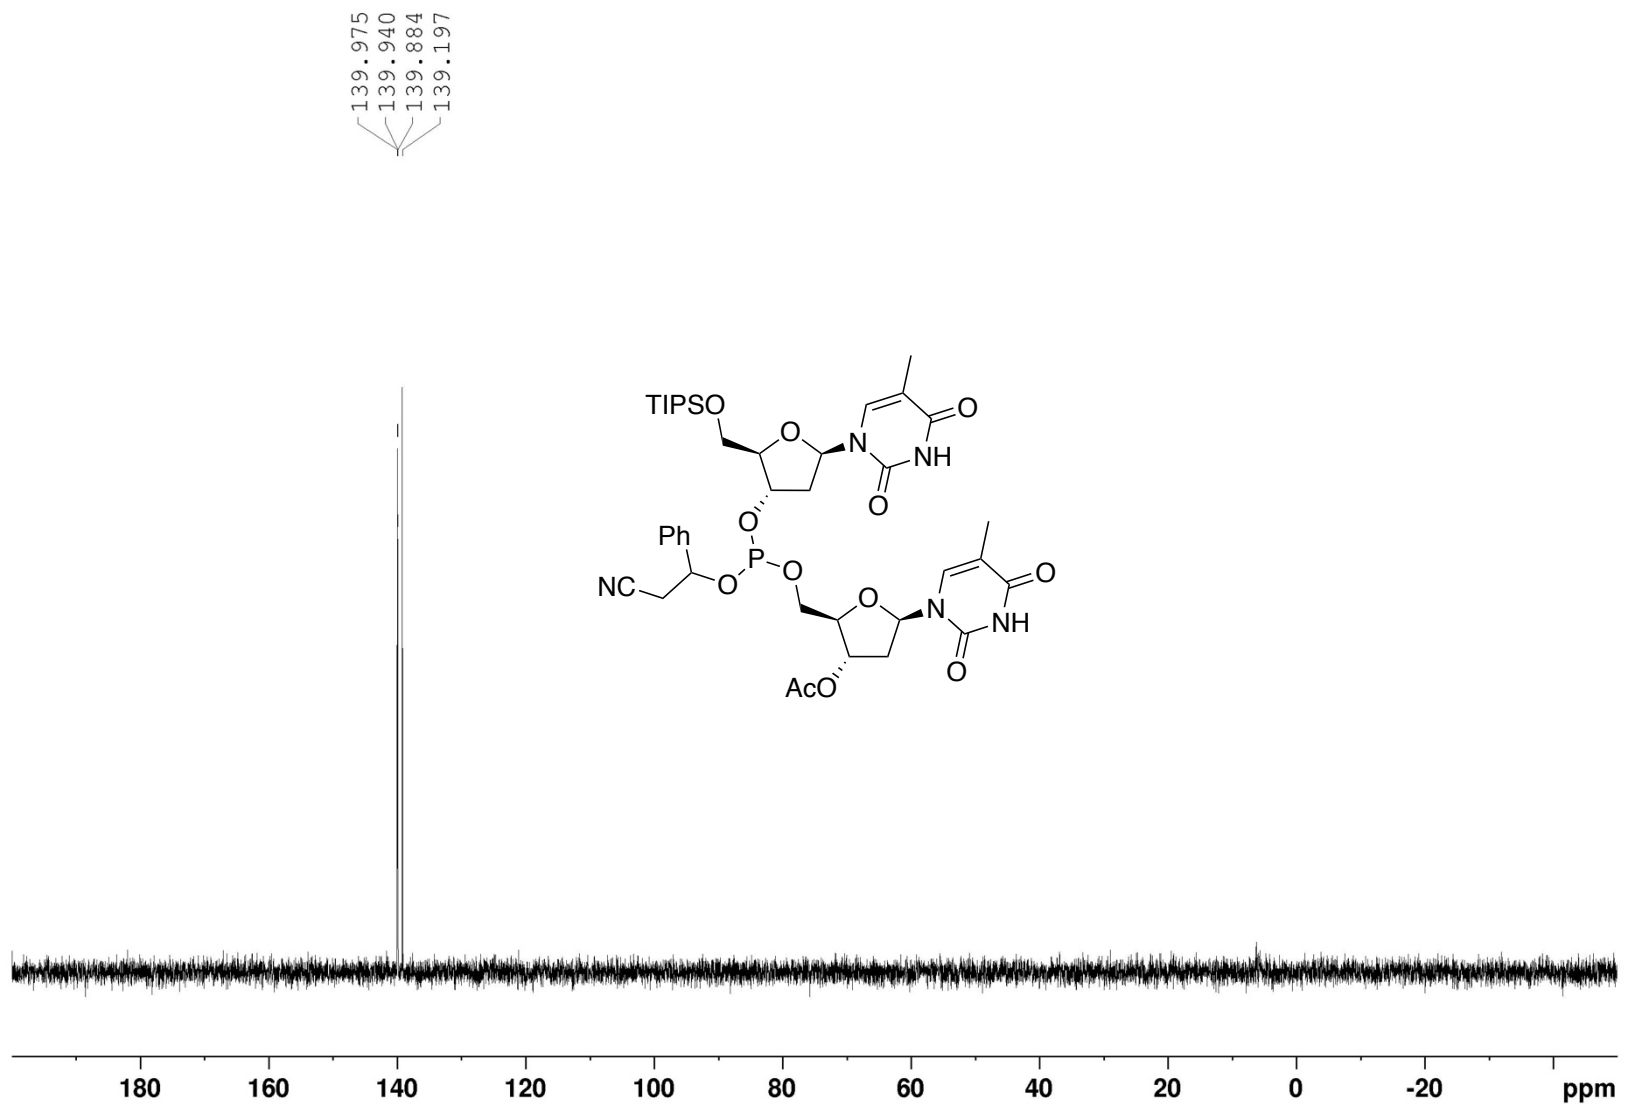

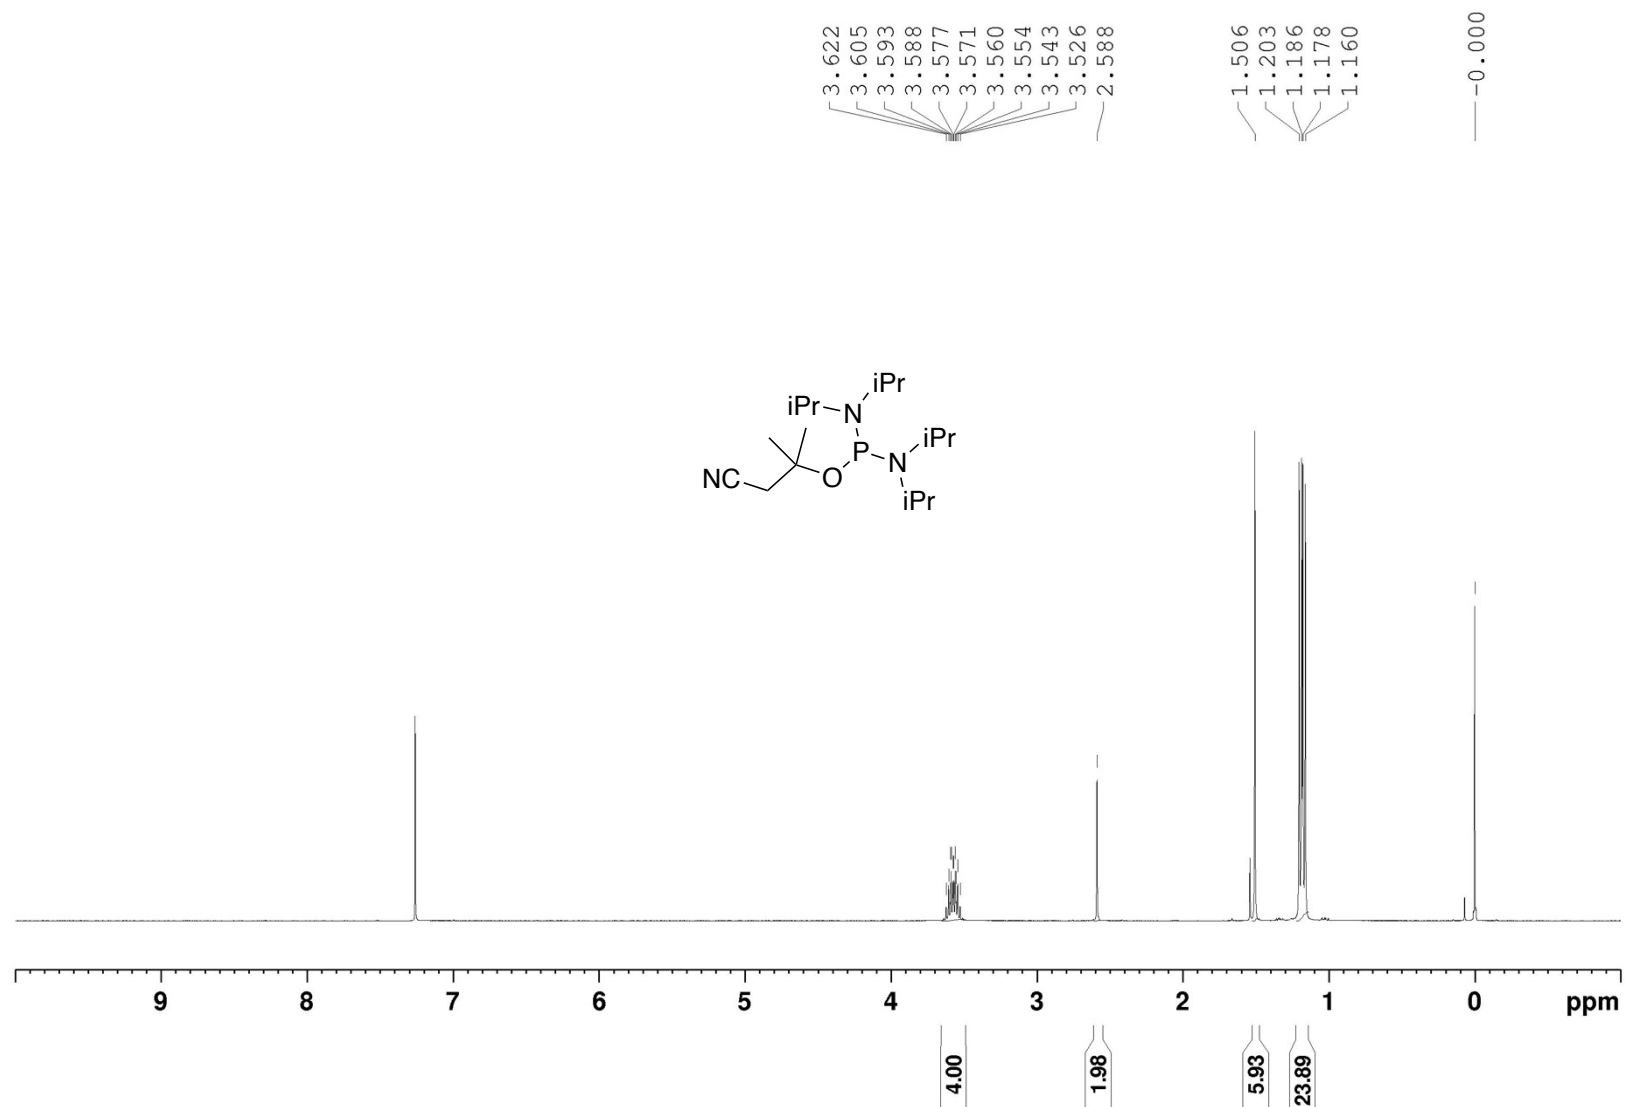

<sup>1</sup>H NMR (400 MHz, CDCl<sub>3</sub>) spectrum of S2-2

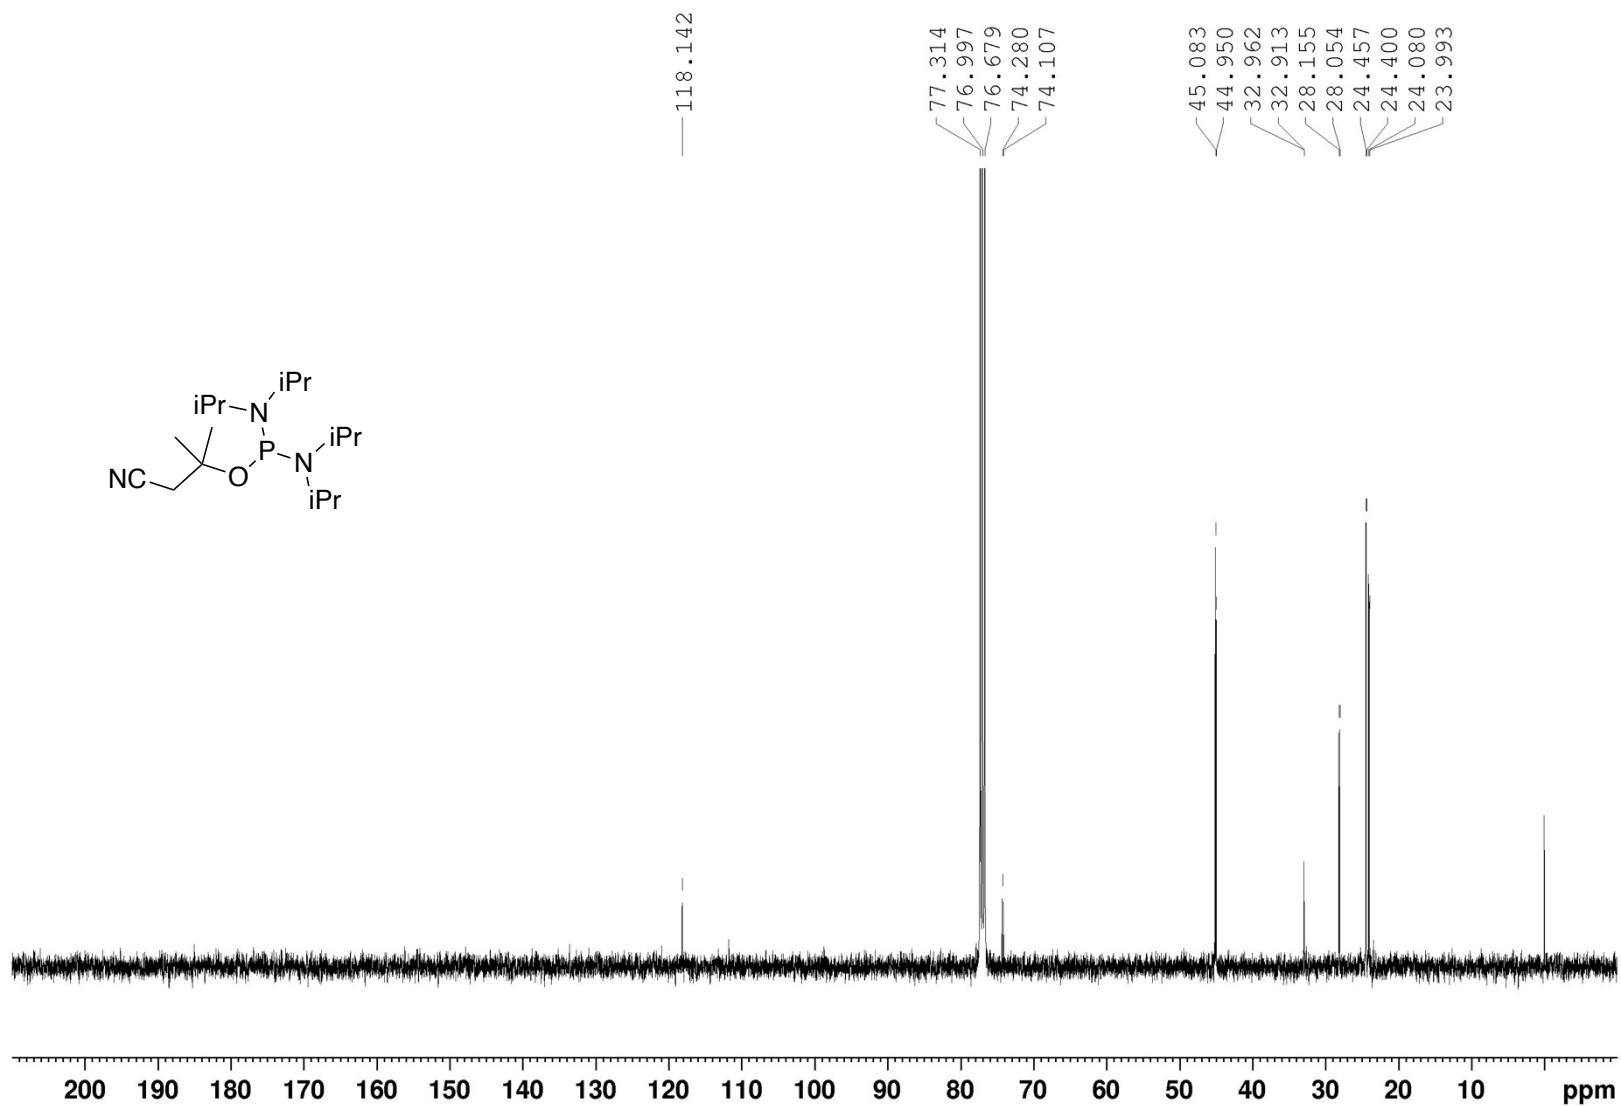

<sup>13</sup>C NMR (100.6 MHz, CDCl<sub>3</sub>) spectrum of S2-2

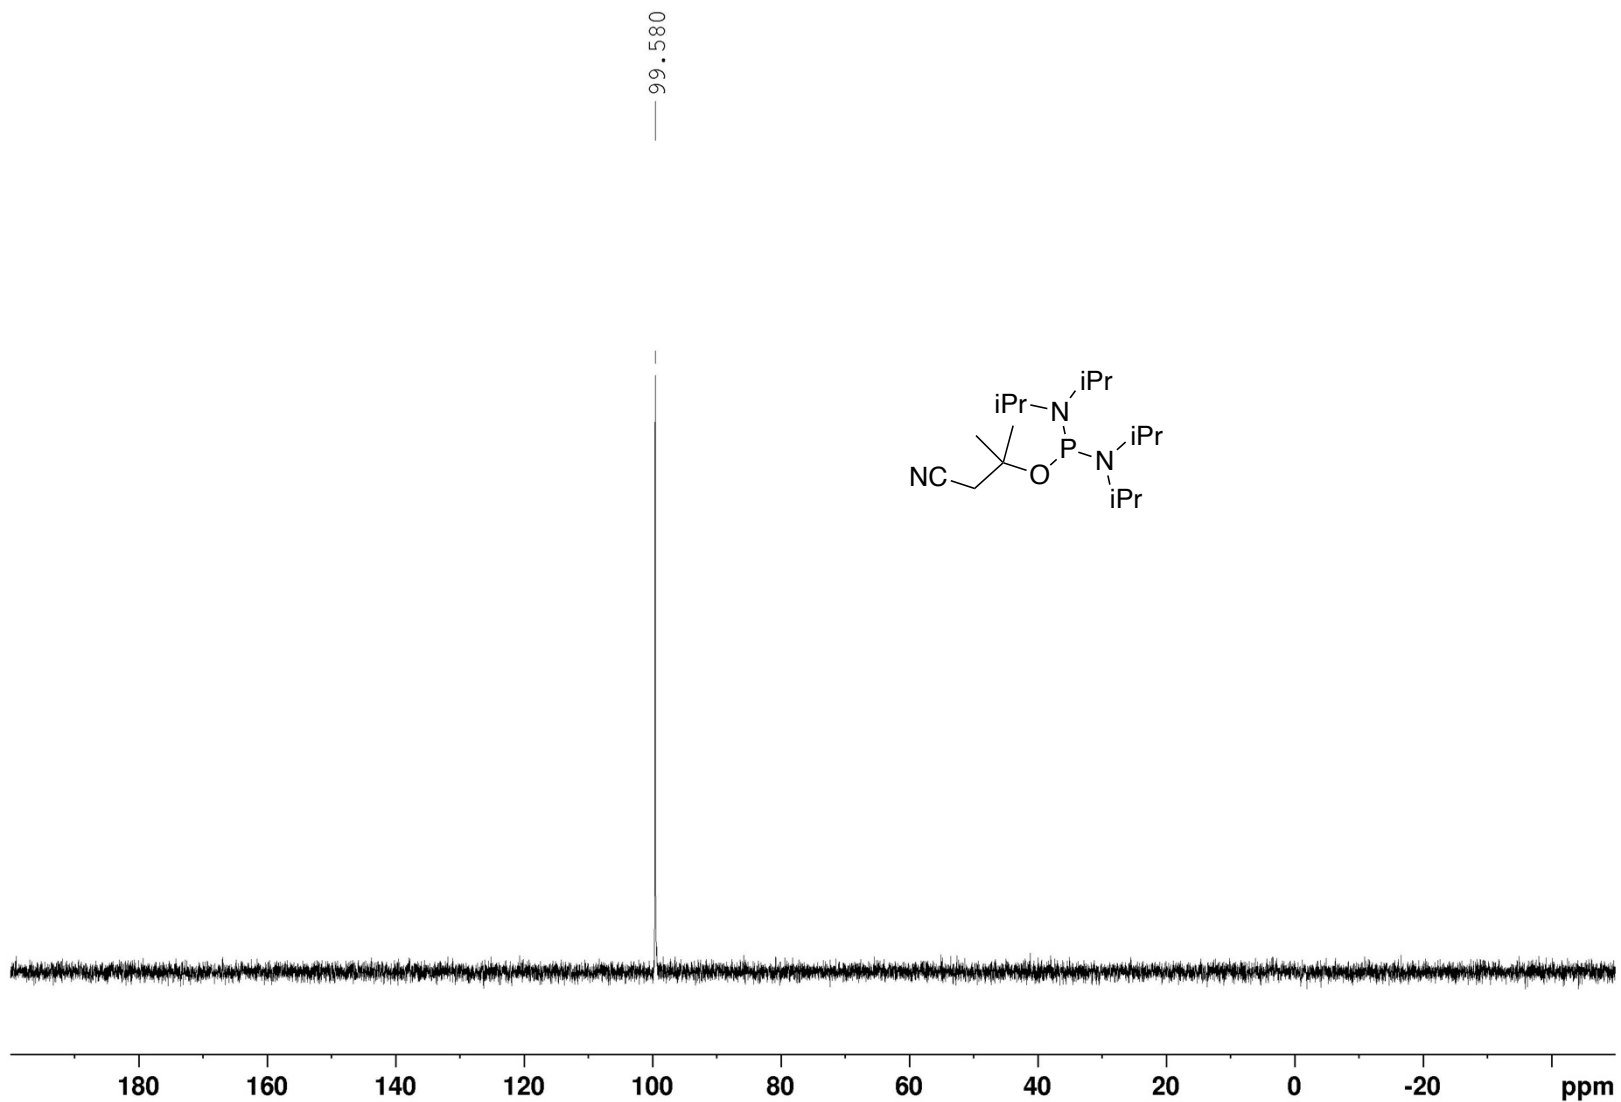

$^{31}\text{P}$  NMR (162 MHz,  $\text{CDCl}_3$ ) spectrum of **S2-2**

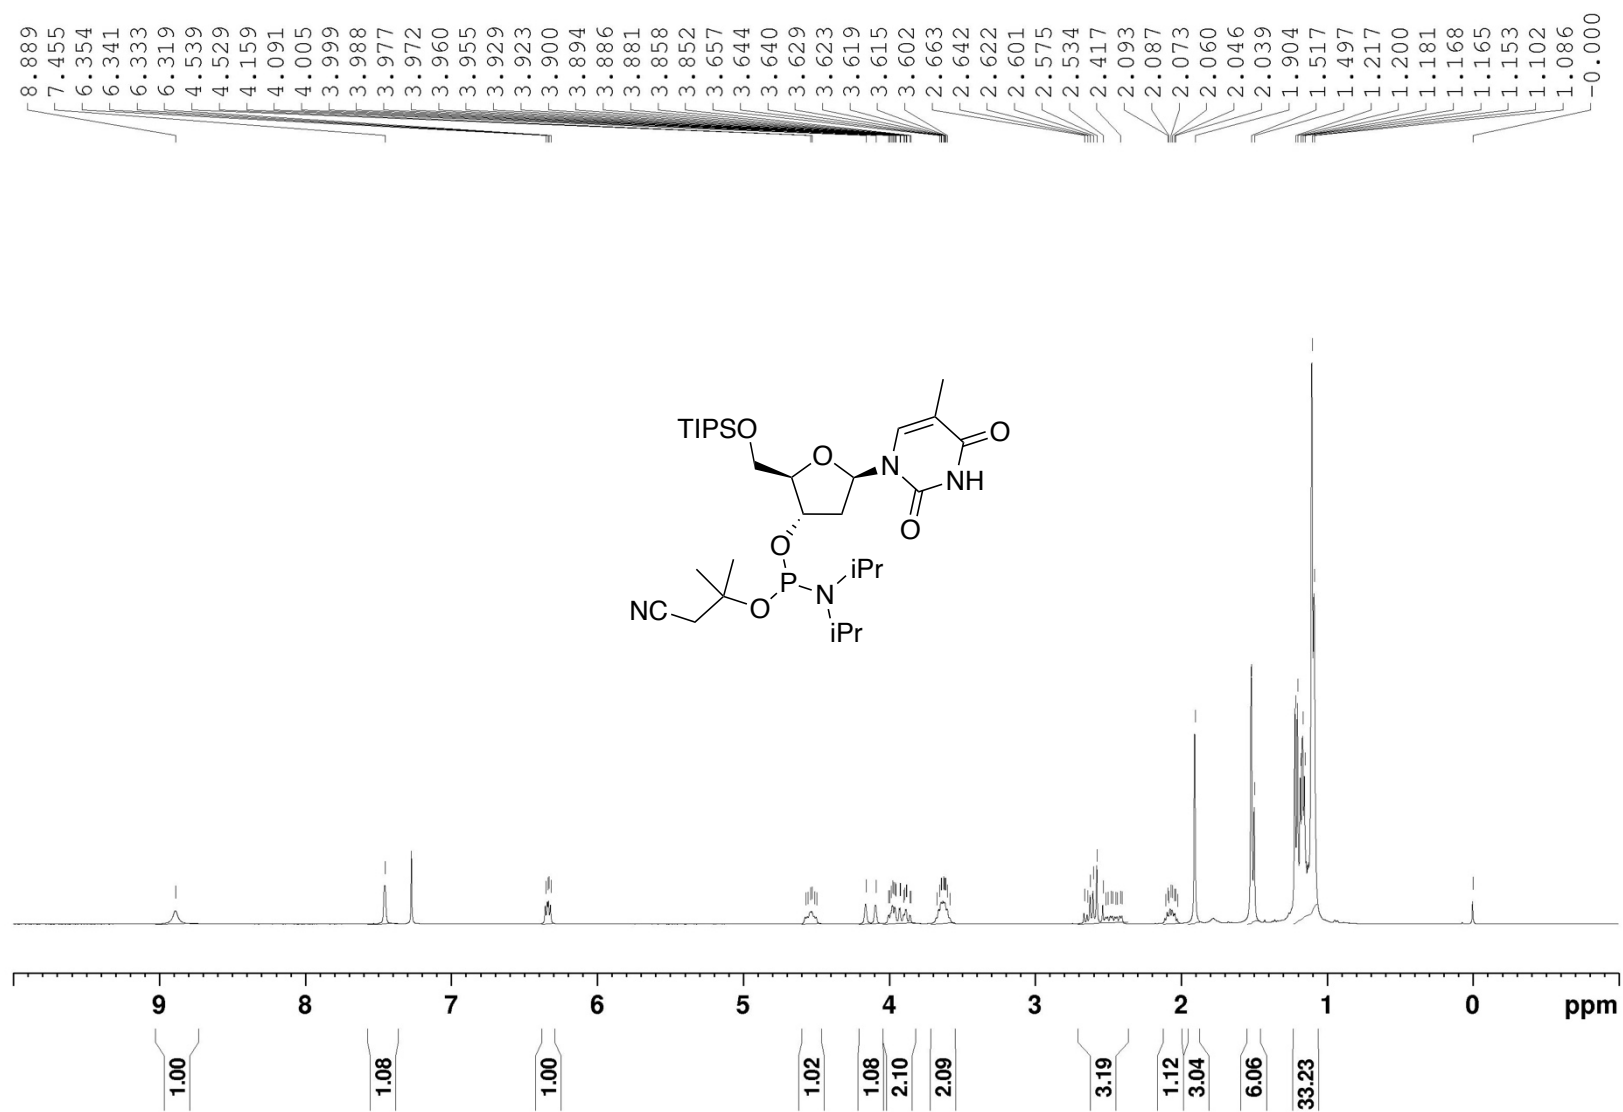

<sup>1</sup>H NMR (400 MHz, CDCl<sub>3</sub>) spectrum of S3-2

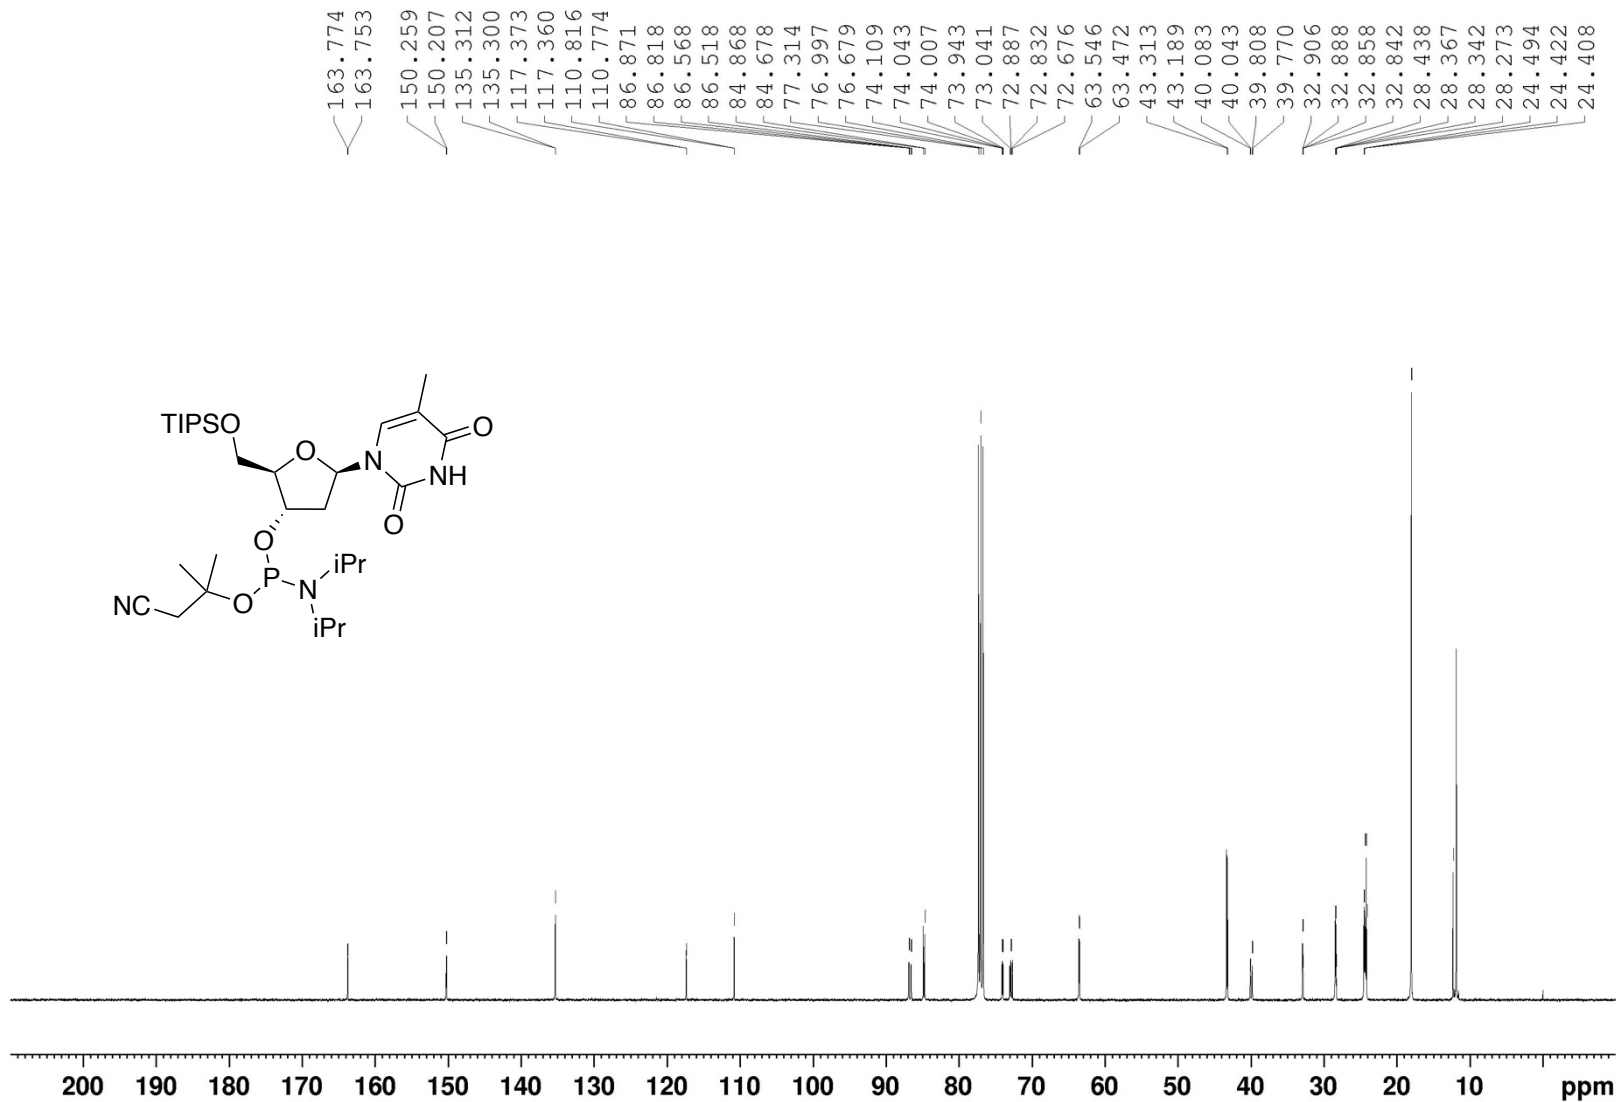

$^{13}\text{C}$  NMR (100.6 MHz,  $\text{CDCl}_3$ ) spectrum of S3-2

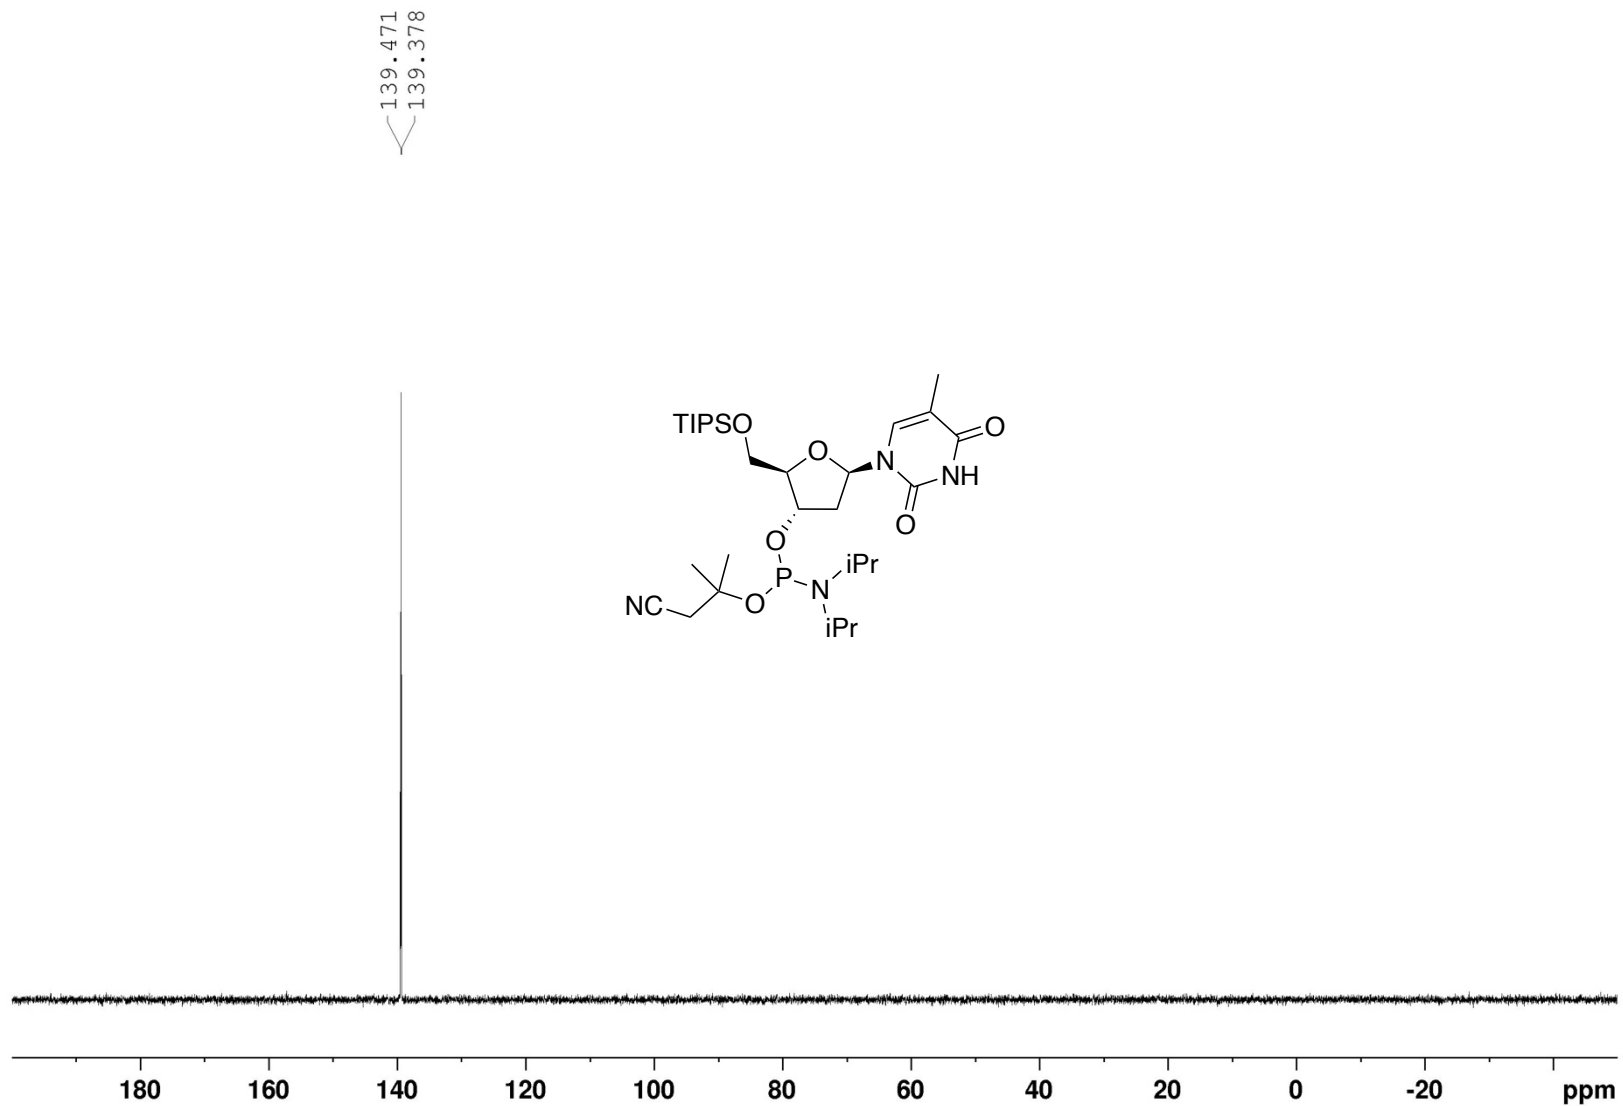

$^{31}\text{P}$  NMR (162 MHz,  $\text{CDCl}_3$ ) spectrum of **S3-2**

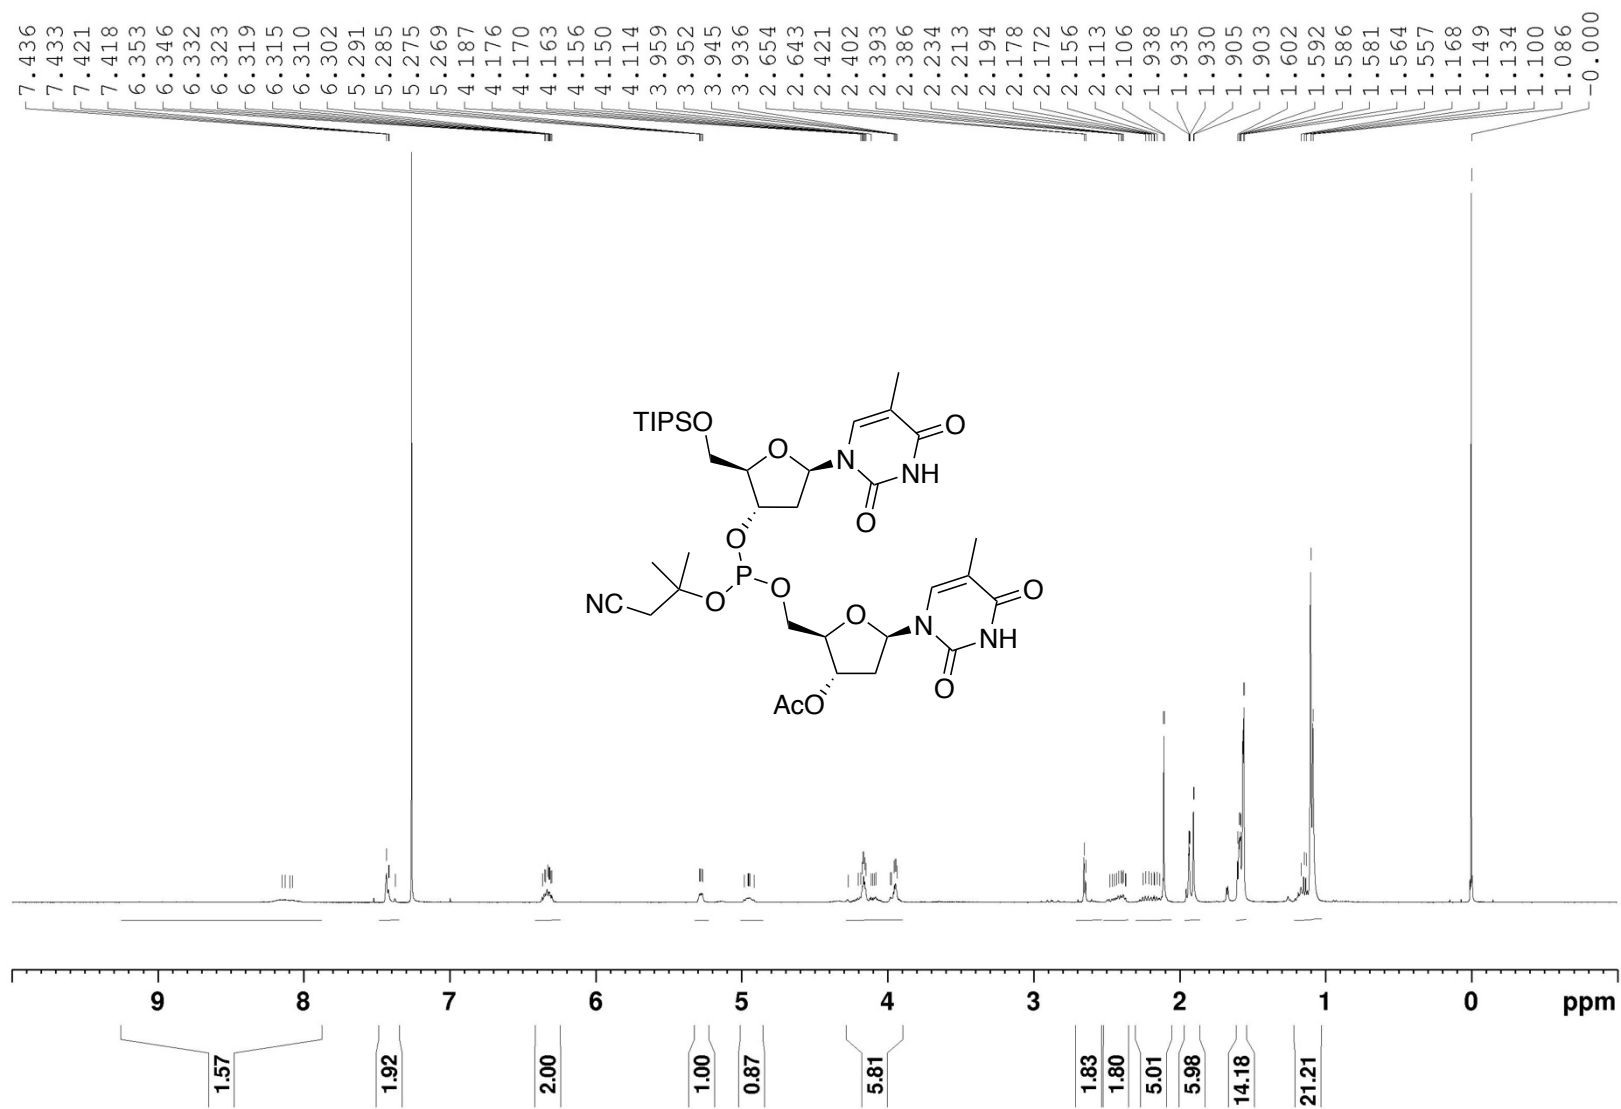

<sup>1</sup>H NMR (400 MHz, CDCl<sub>3</sub>) spectrum of **1a-2**



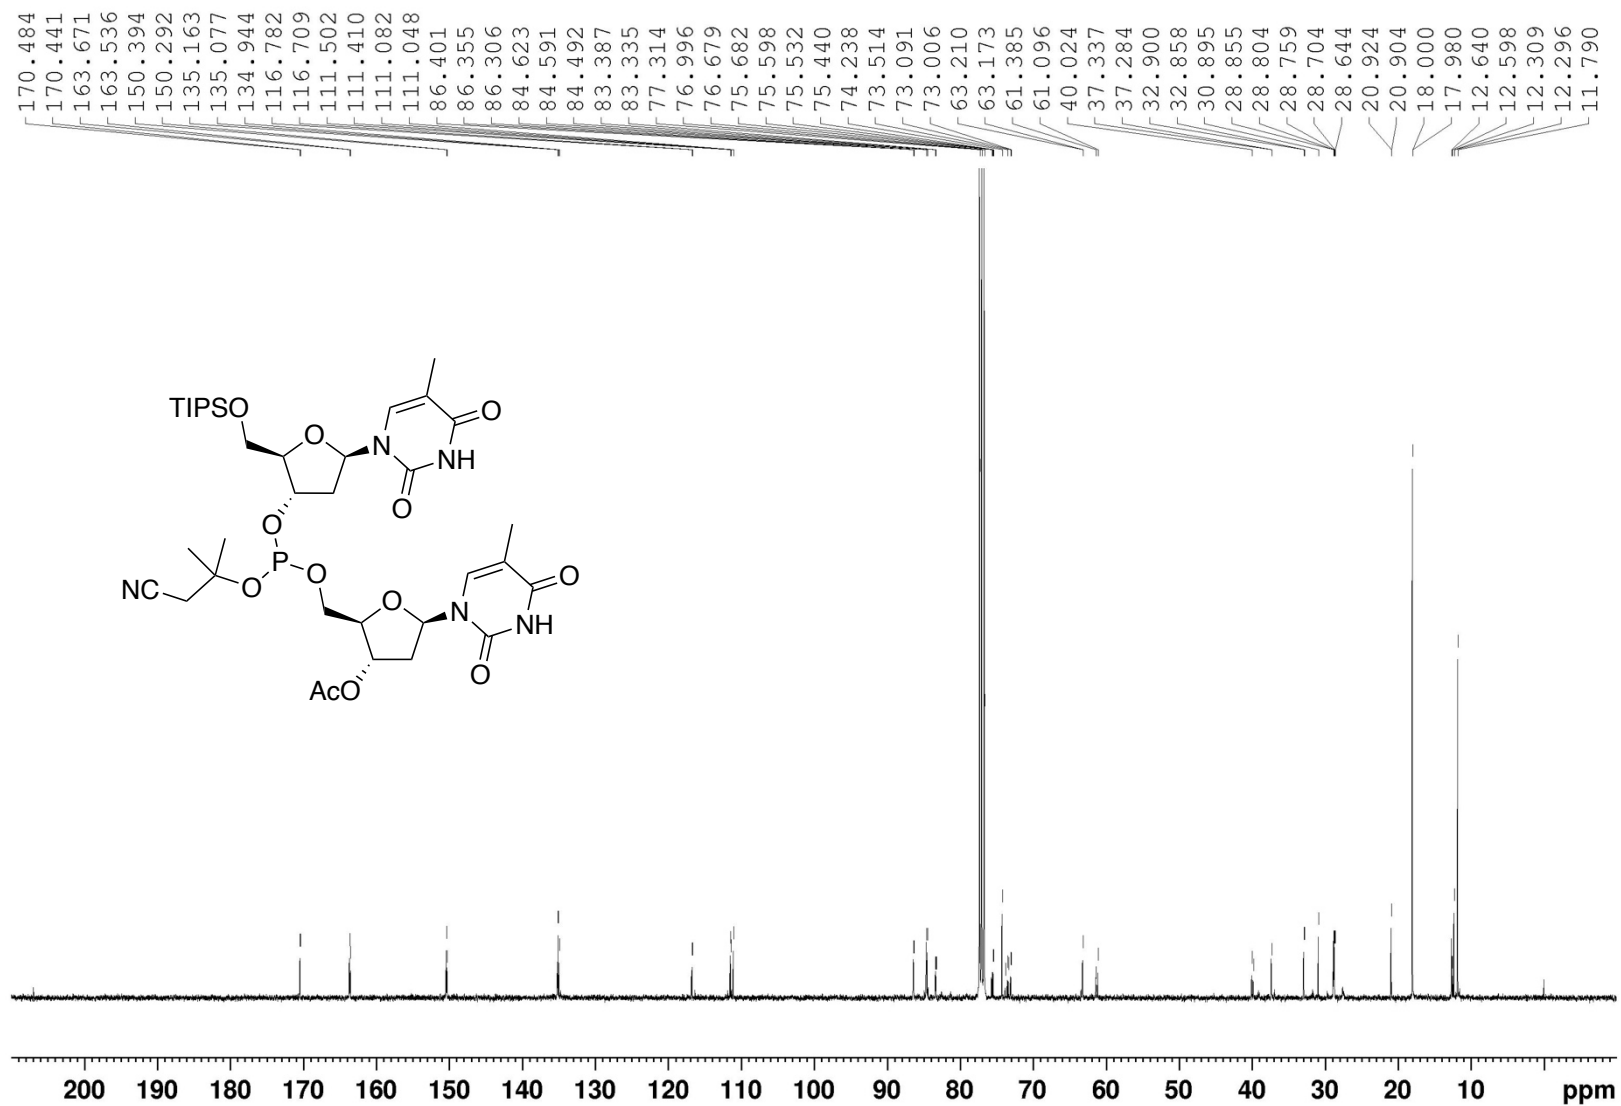

<sup>13</sup>C NMR (100.6 MHz, CDCl<sub>3</sub>) spectrum of **1a-2**

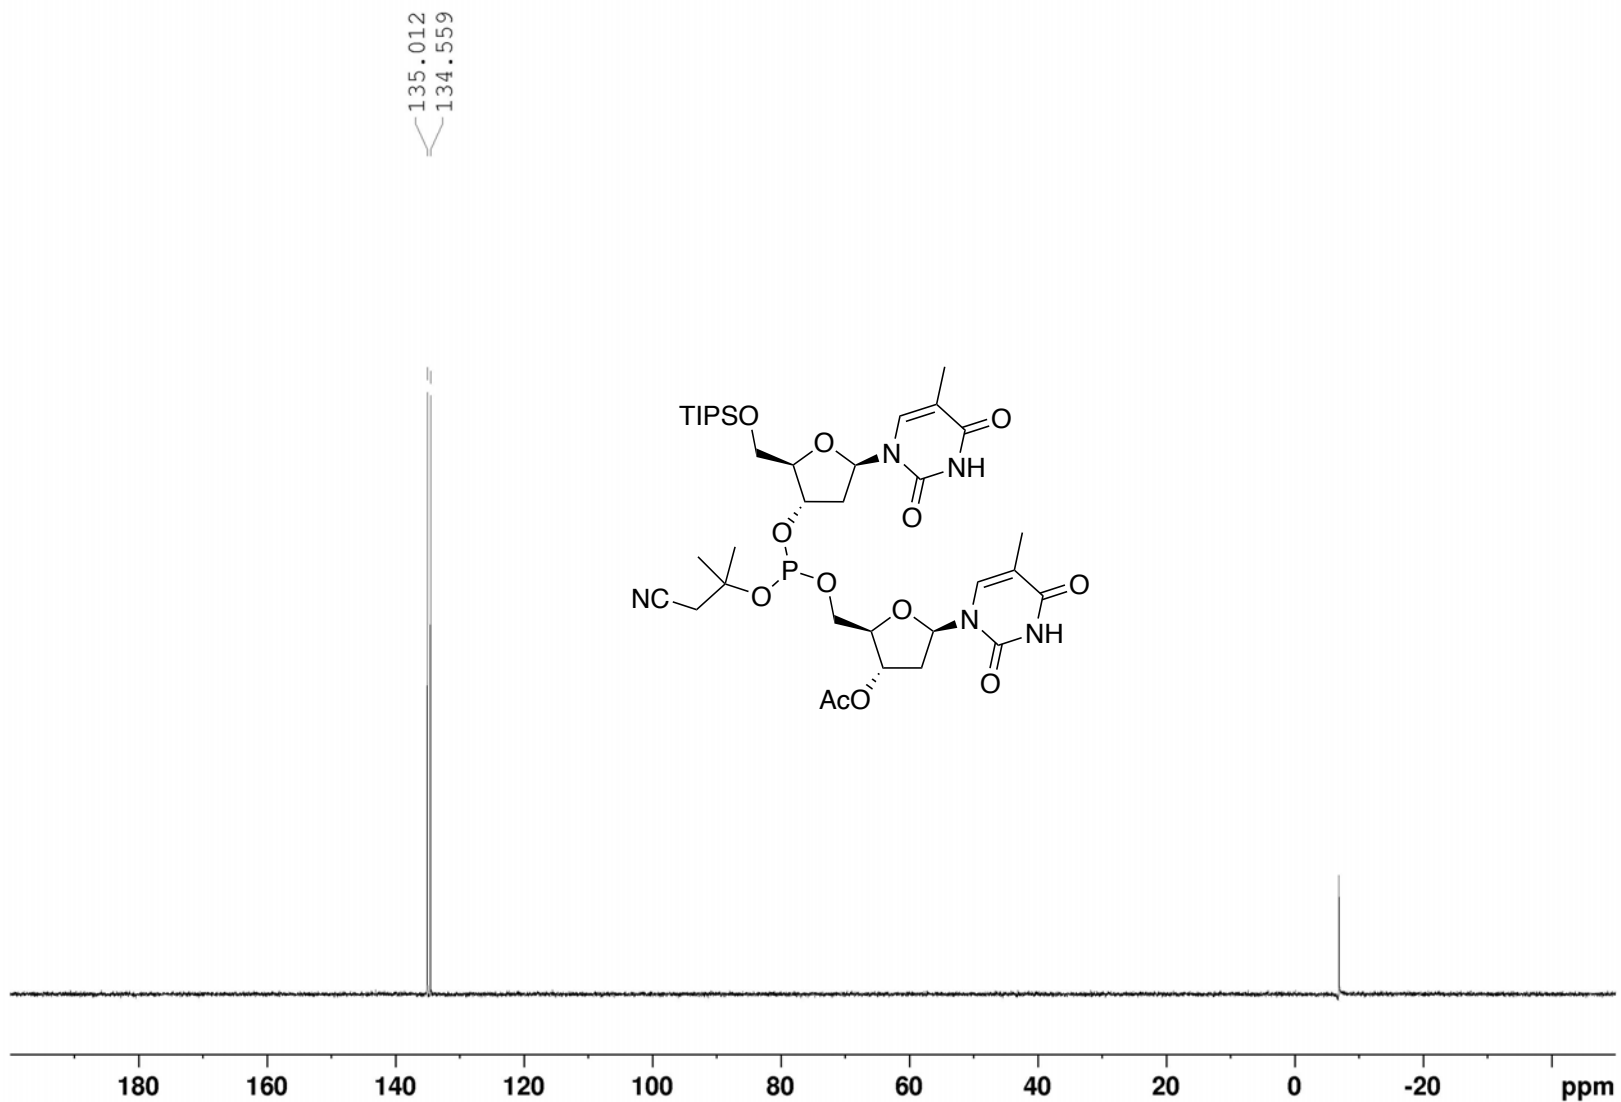

$^{31}\text{P}$  NMR (162 MHz,  $\text{CDCl}_3$ ) spectrum of **1a-2**

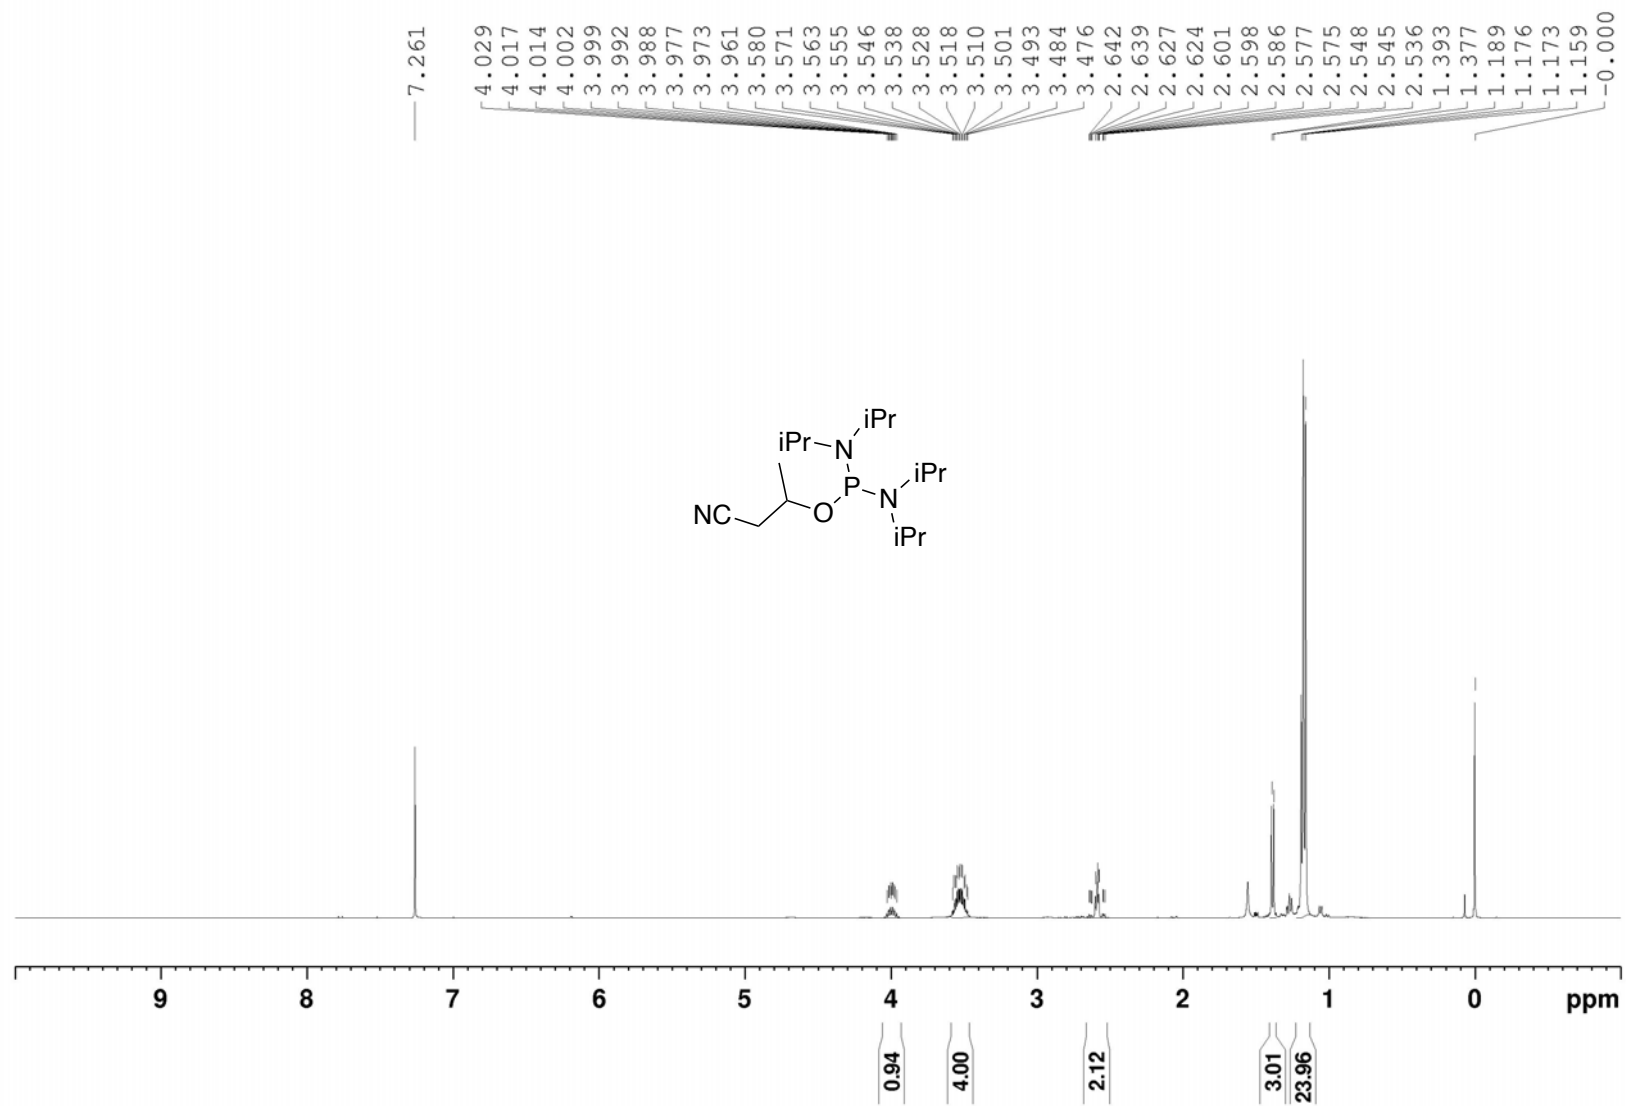

<sup>1</sup>H NMR (400 MHz, CDCl<sub>3</sub>) spectrum of S2-3

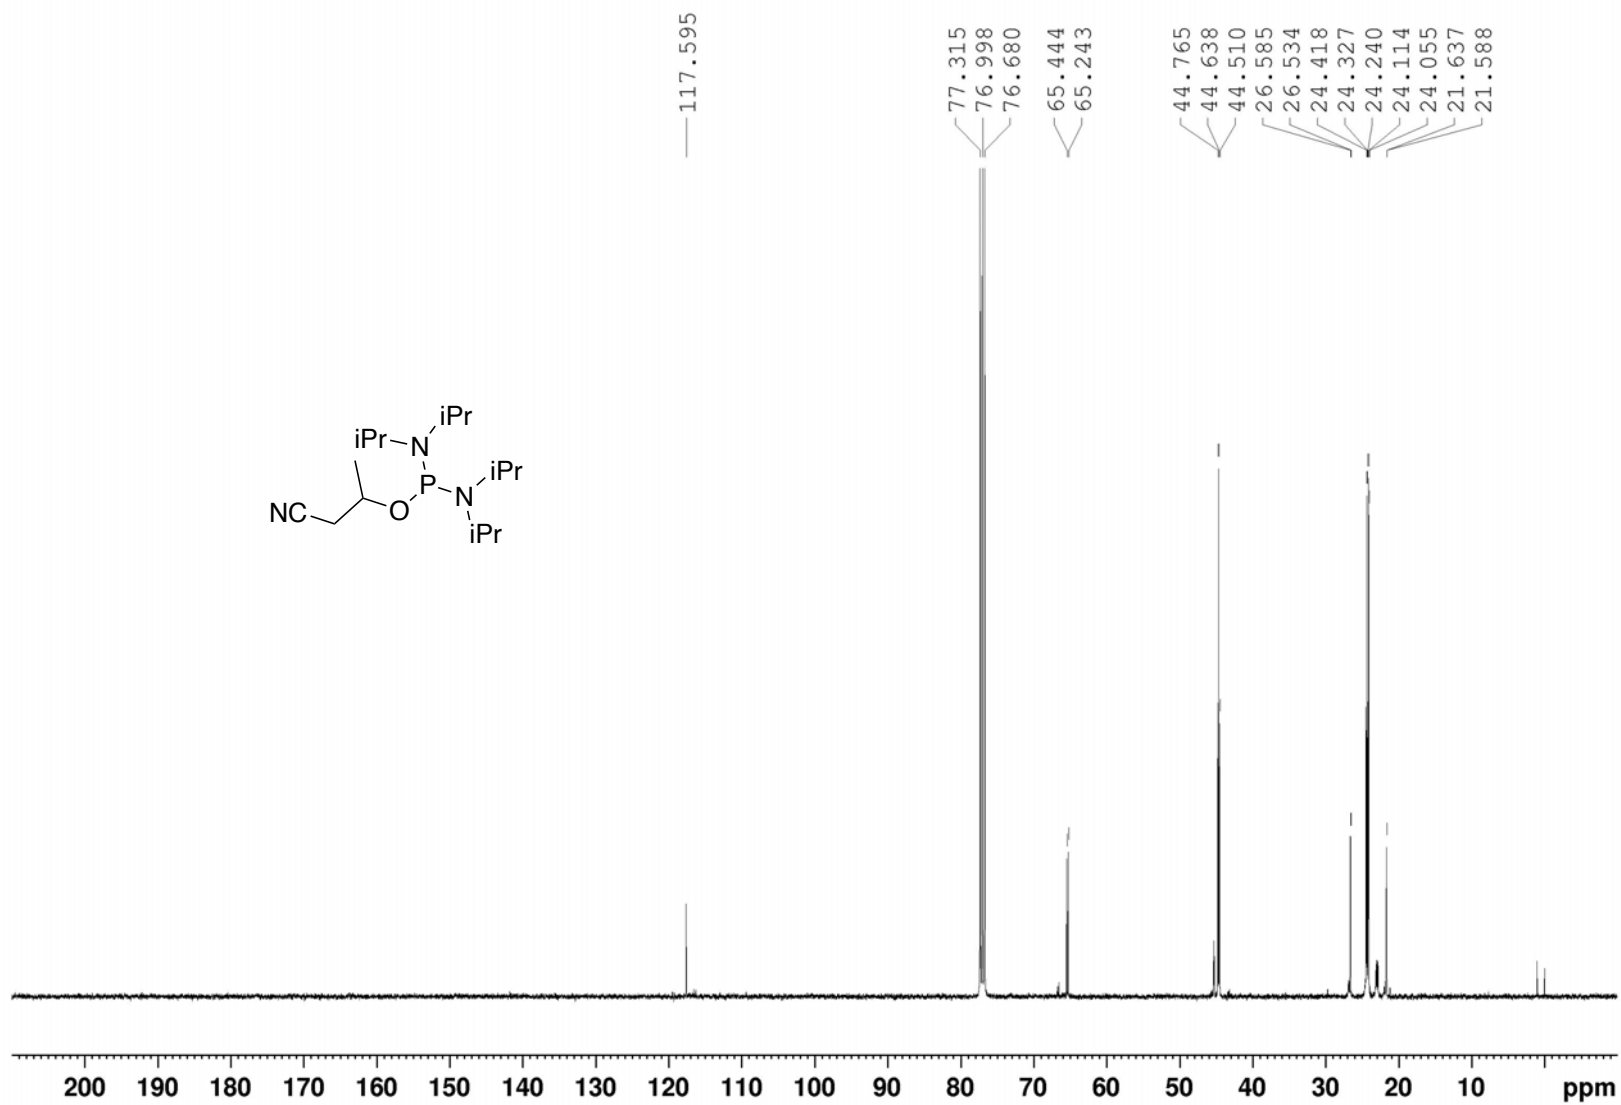

<sup>13</sup>C NMR (100.6 MHz, CDCl<sub>3</sub>) spectrum of S2-3

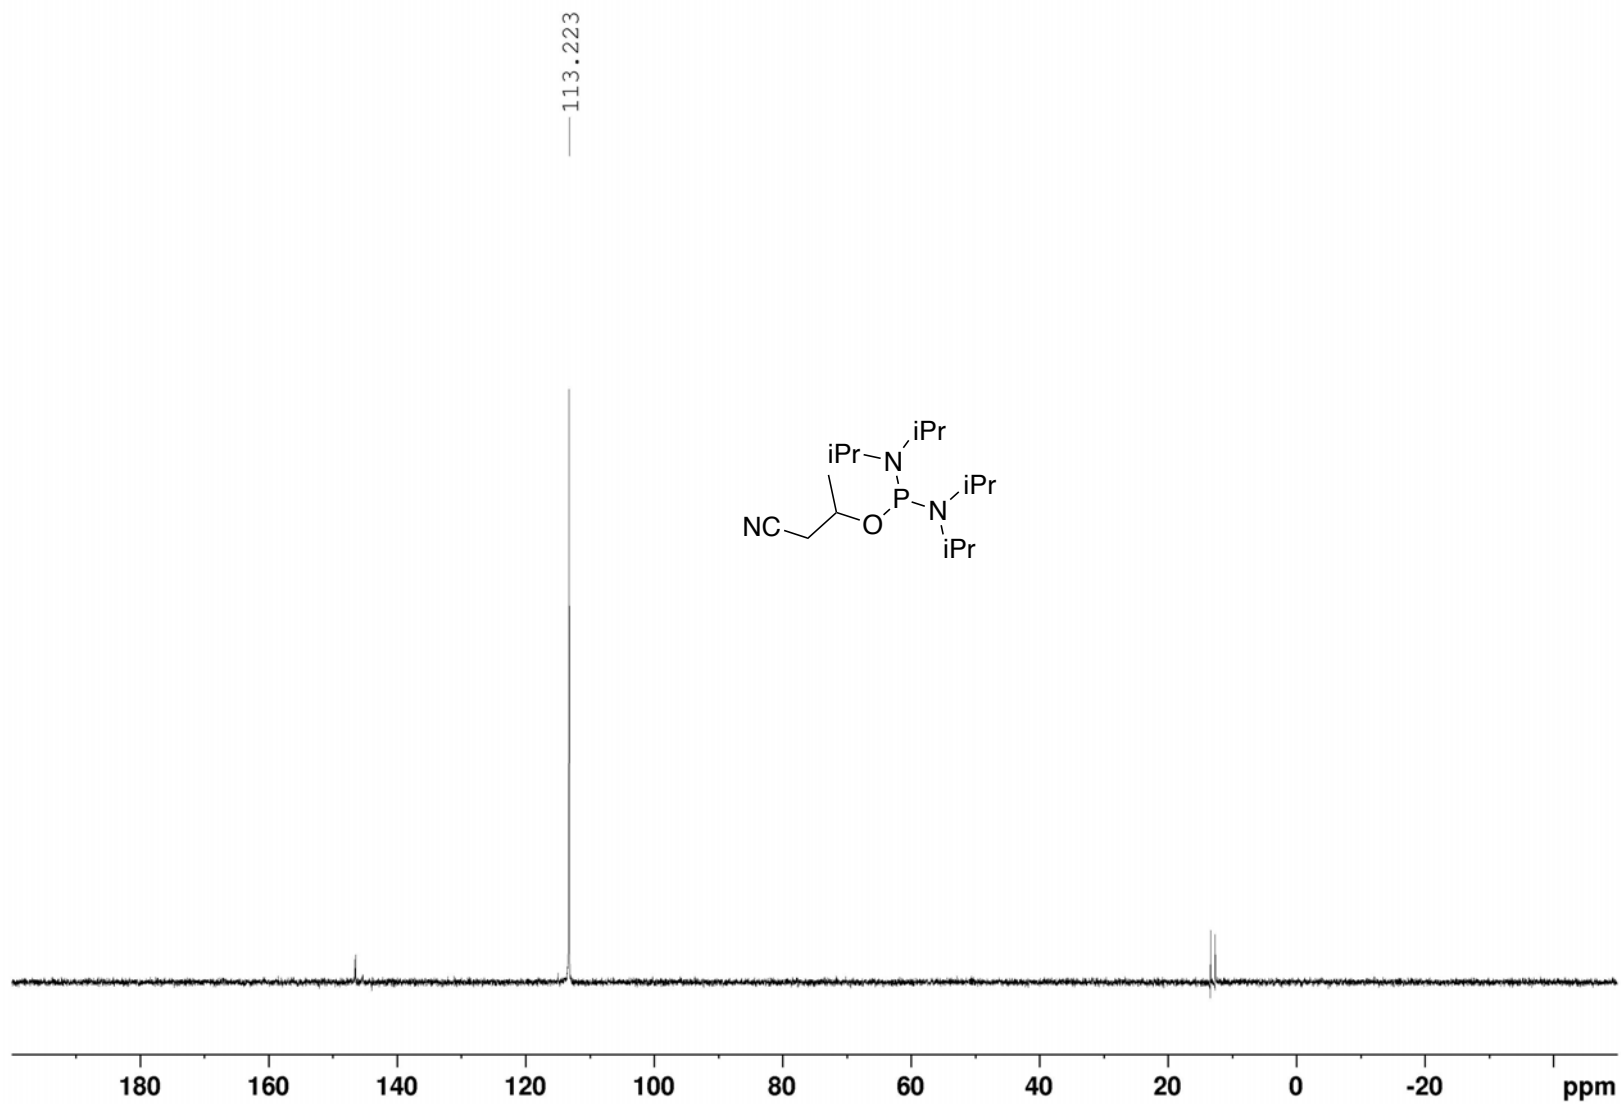

$^{31}\text{P}$  NMR (162 MHz,  $\text{CDCl}_3$ ) spectrum of **S2-3**

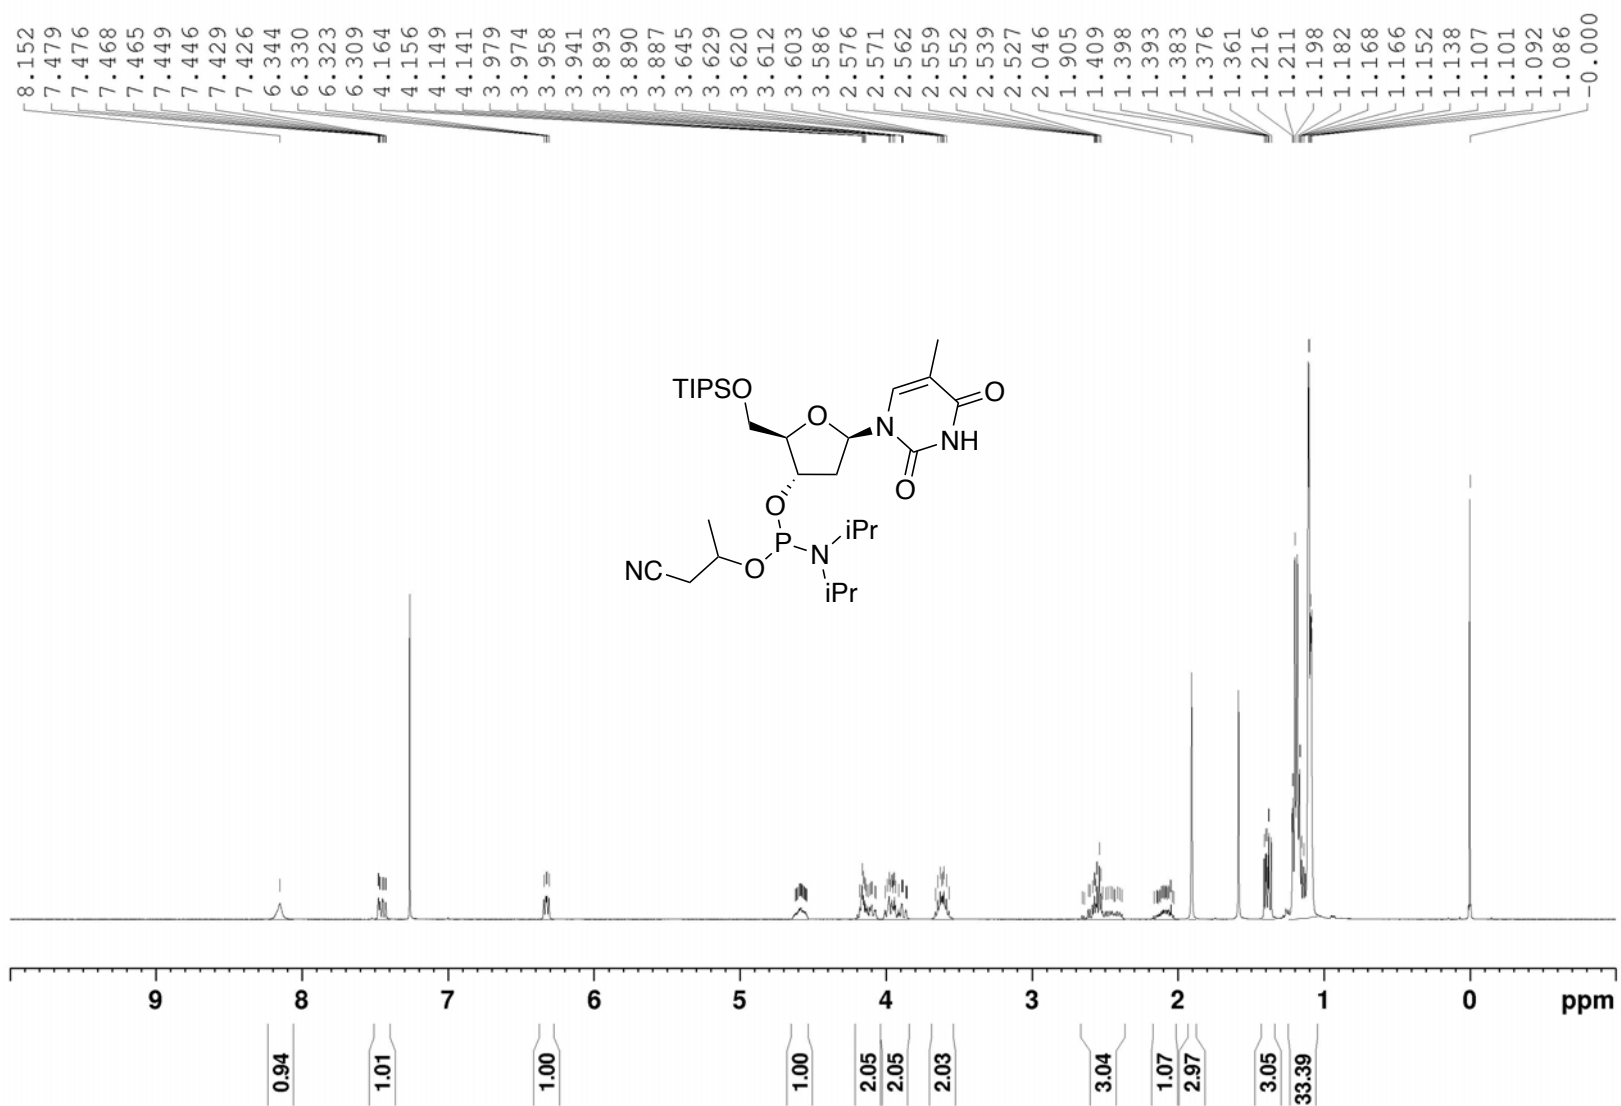

<sup>1</sup>H NMR (400 MHz, CDCl<sub>3</sub>) spectrum of S3-3

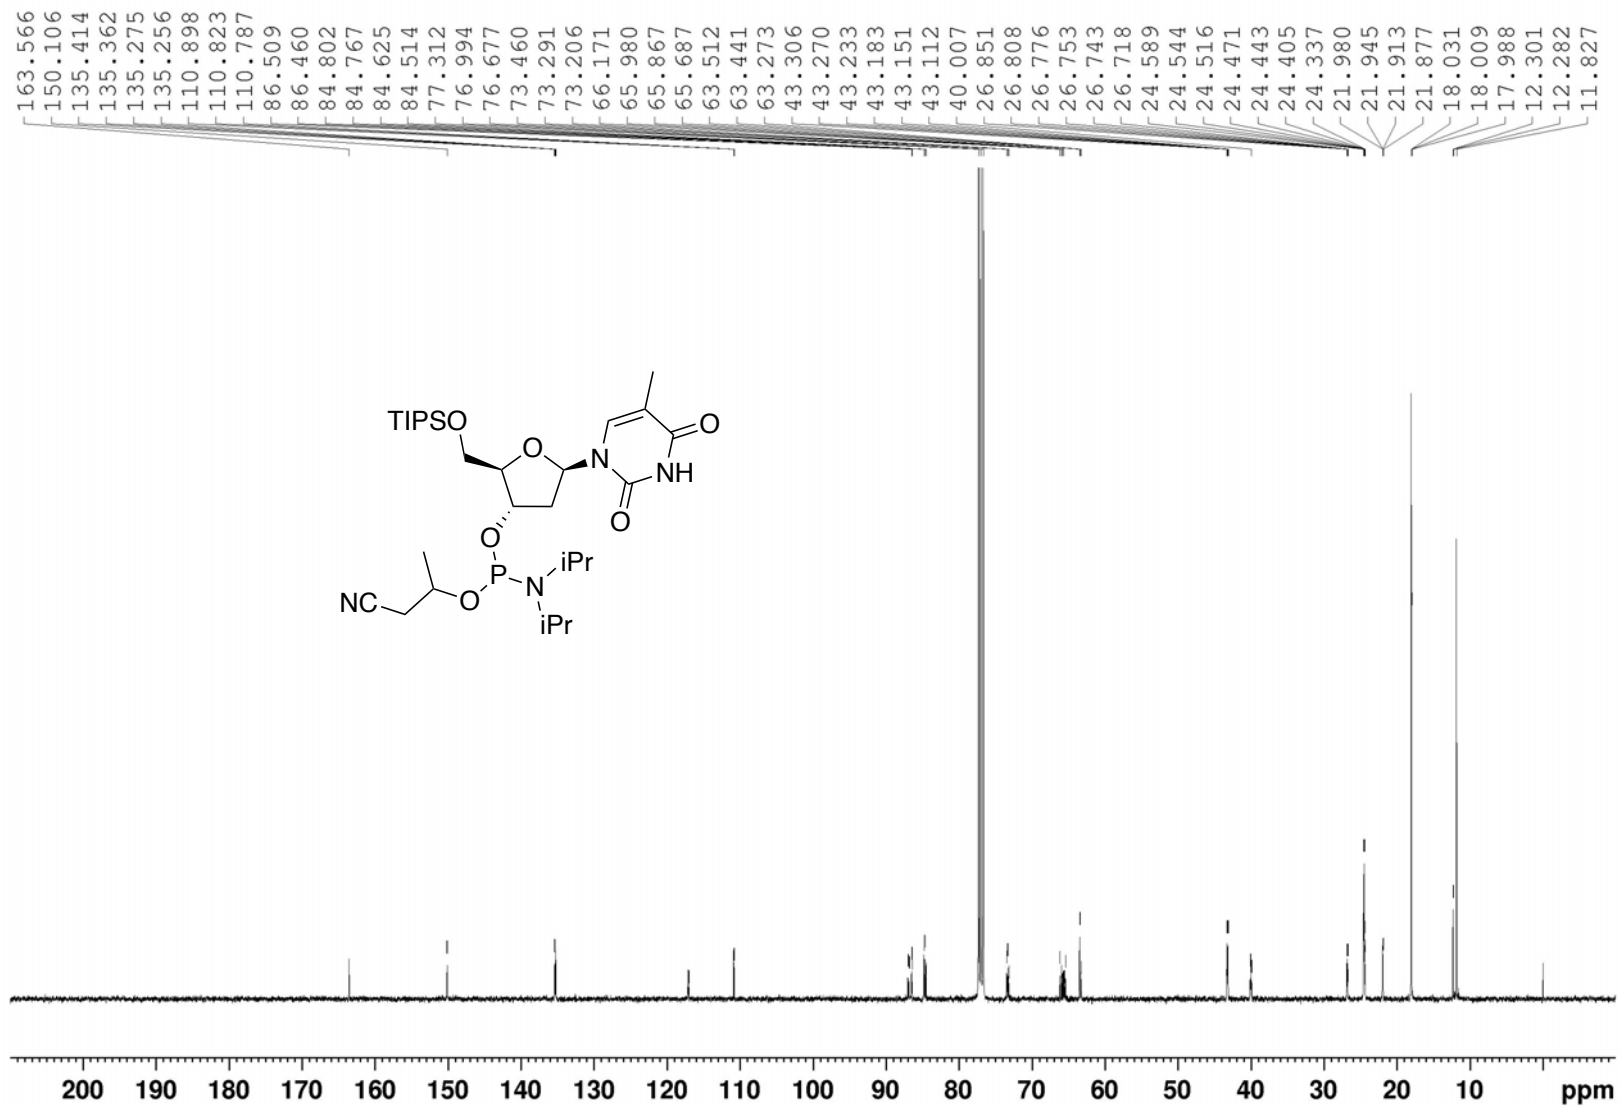

<sup>13</sup>C NMR (100.6 MHz, CDCl<sub>3</sub>) spectrum of S3-3

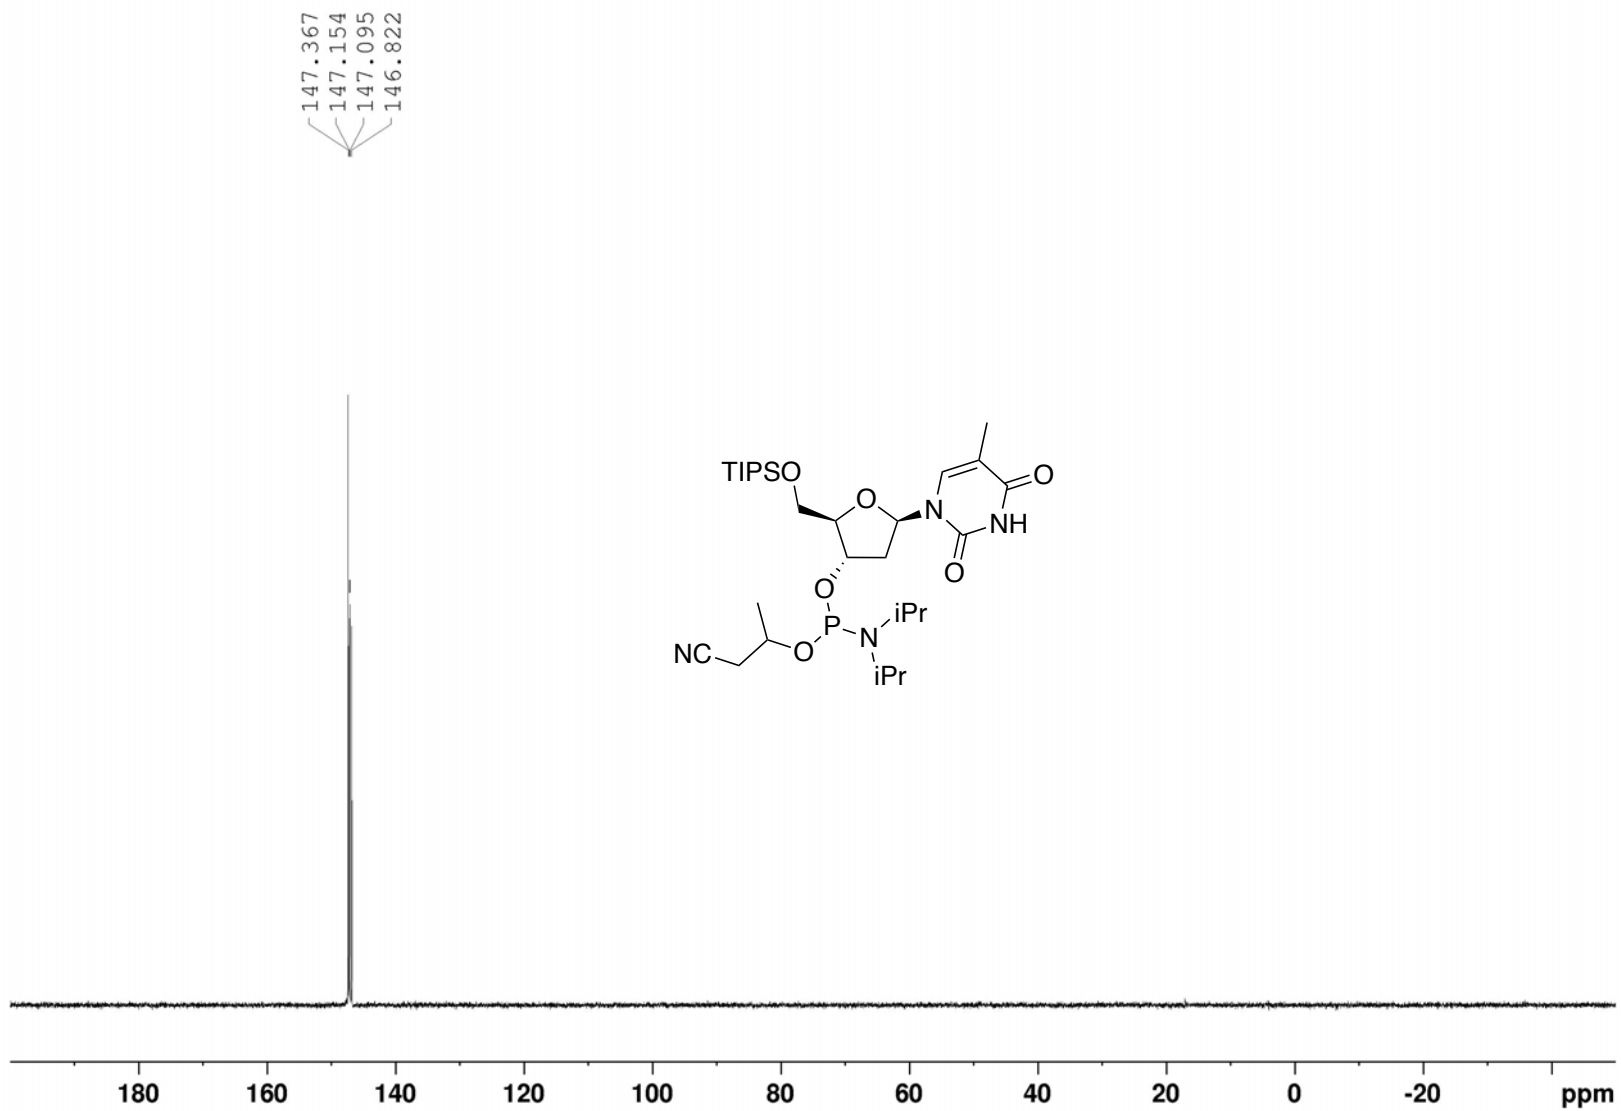

$^{31}\text{P}$  NMR (162 MHz,  $\text{CDCl}_3$ ) spectrum of **S3-3**



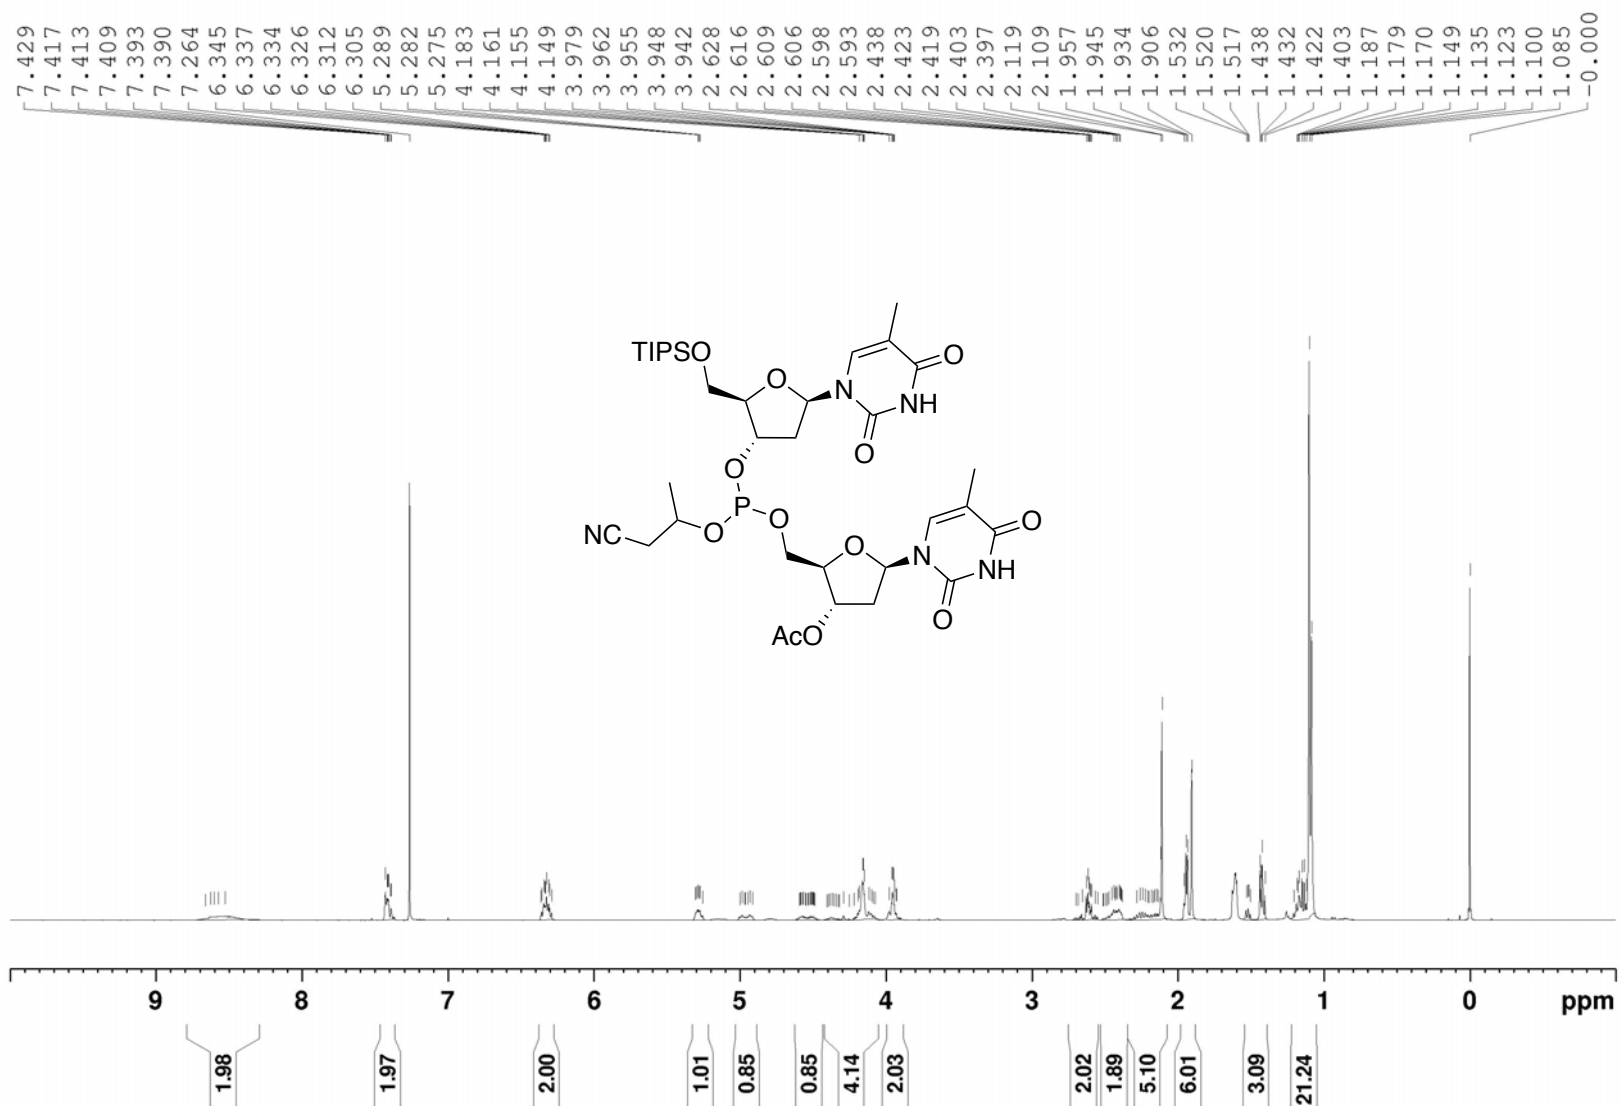

<sup>1</sup>H NMR (400 MHz, CDCl<sub>3</sub>) spectrum of **1a-3**

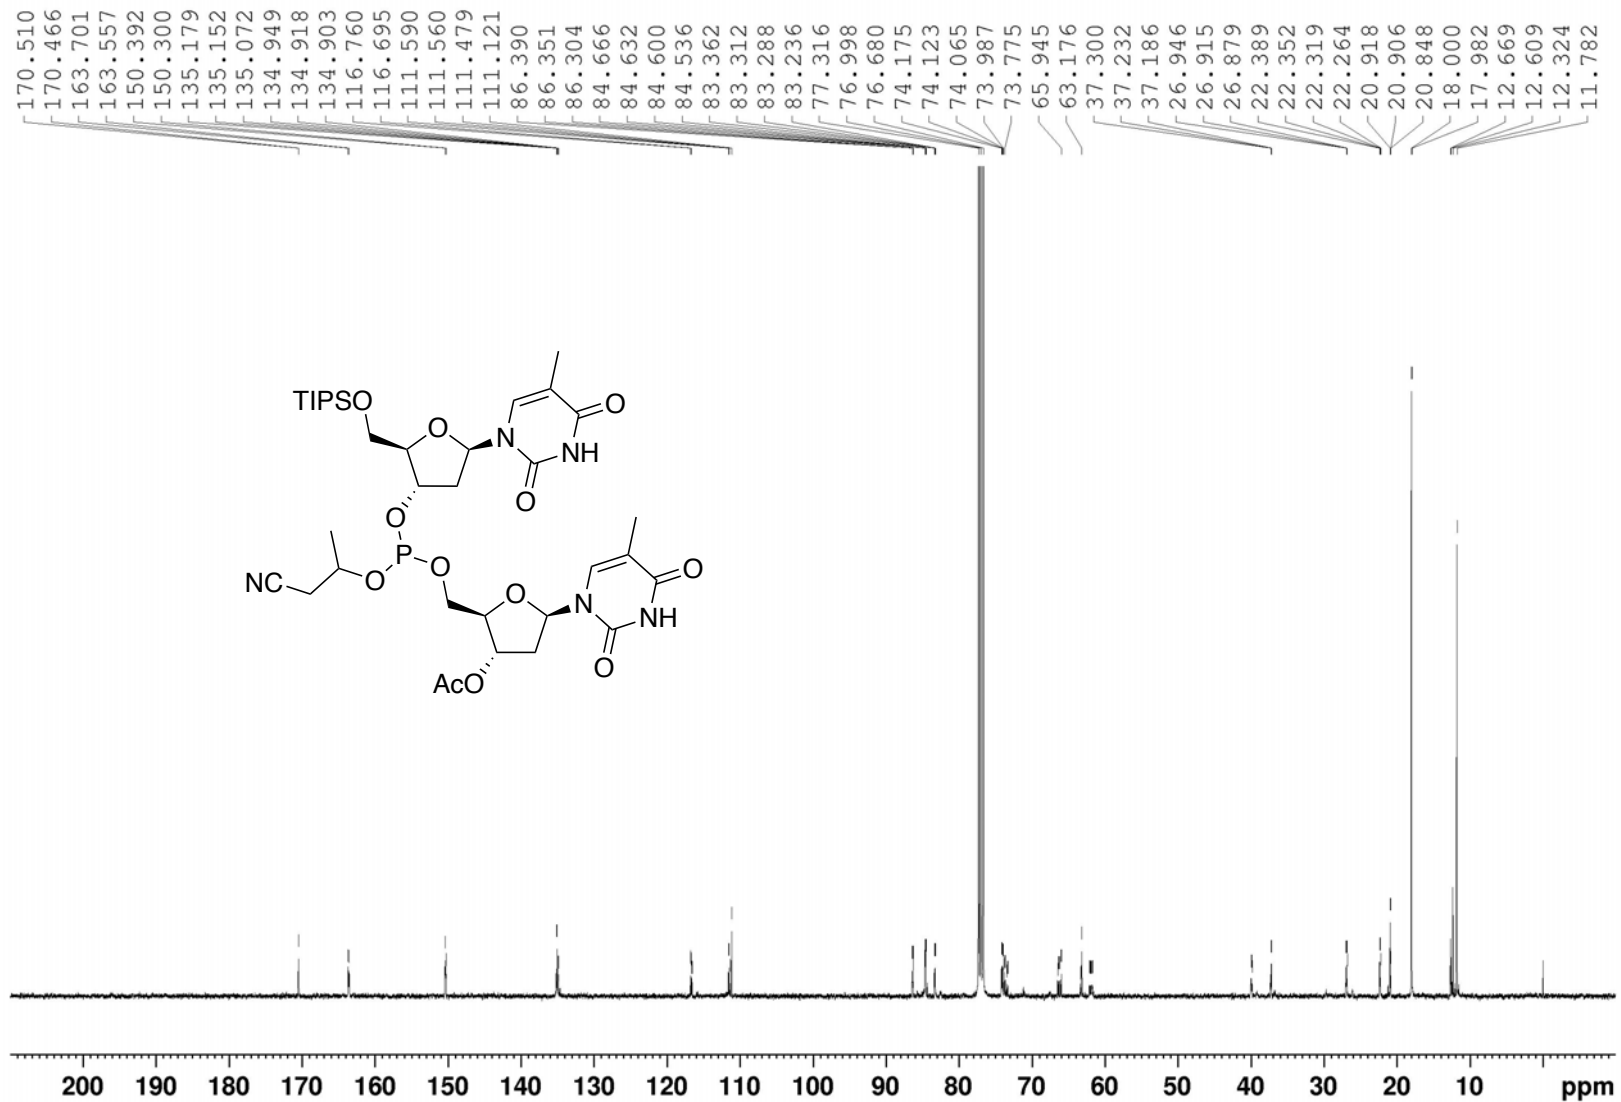

<sup>13</sup>C NMR (100.6 MHz, CDCl<sub>3</sub>) spectrum of **1a-3**

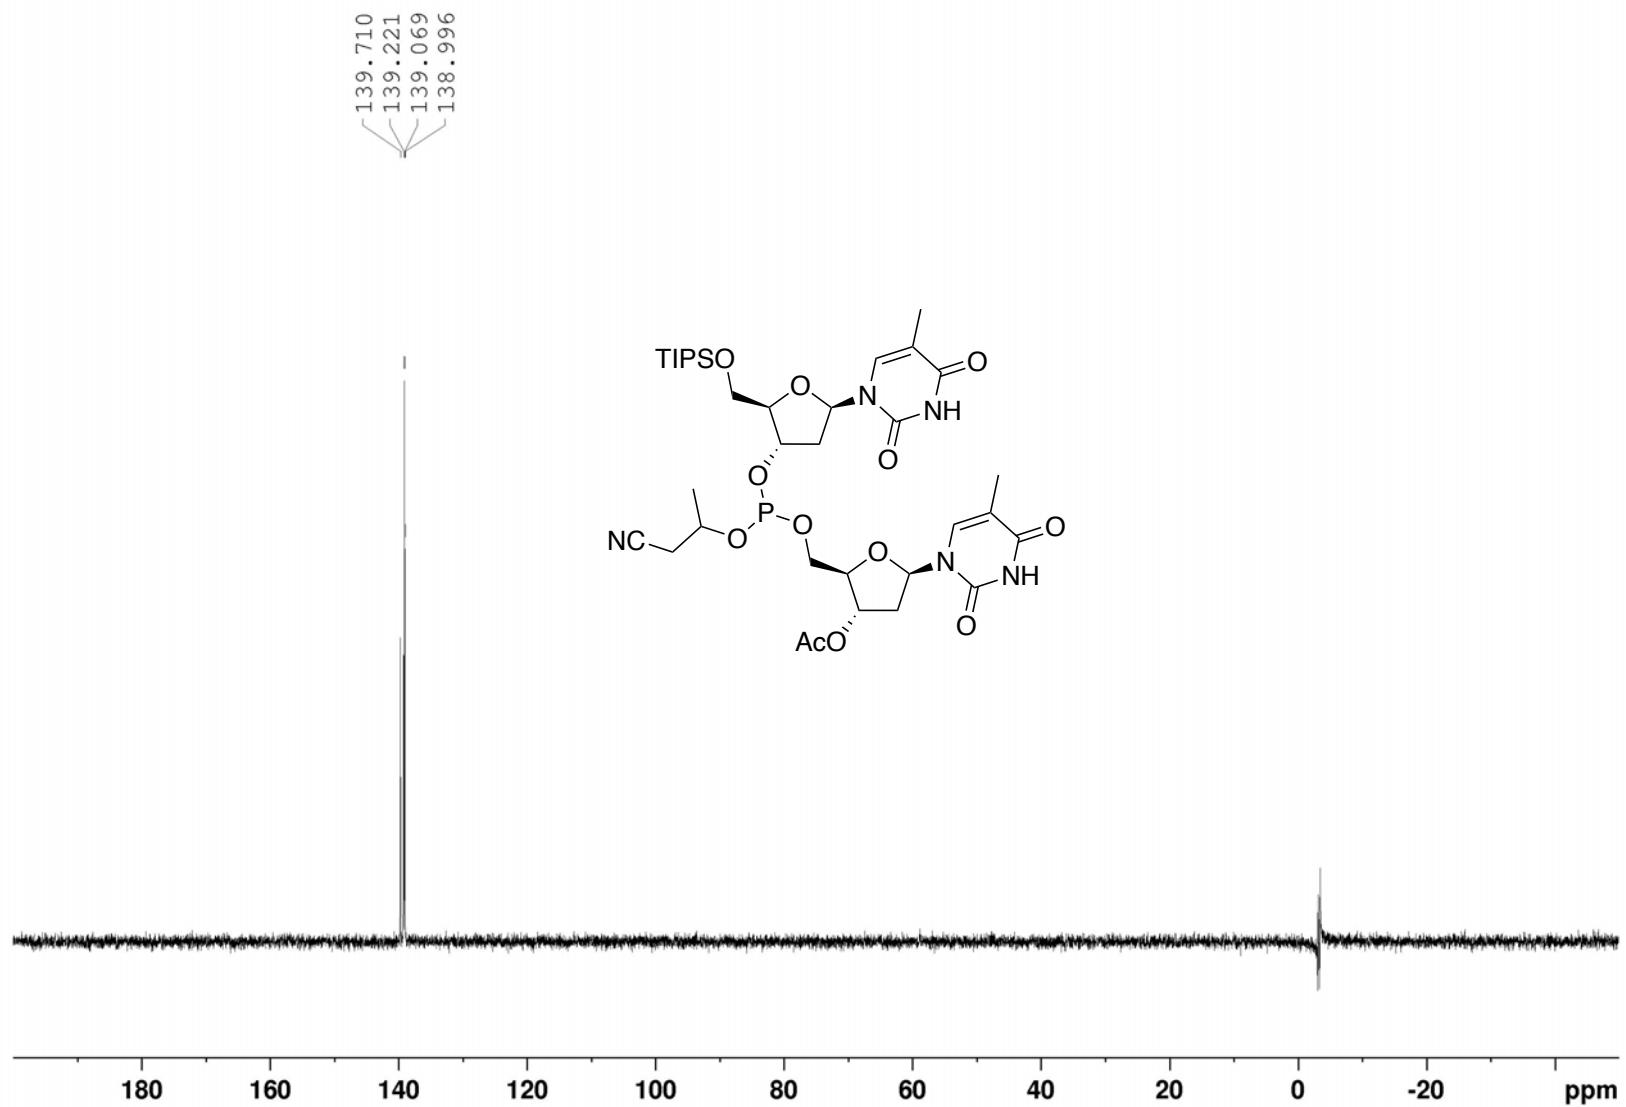

$^{31}\text{P}$  NMR (162 MHz,  $\text{CDCl}_3$ ) spectrum of **1a-3**

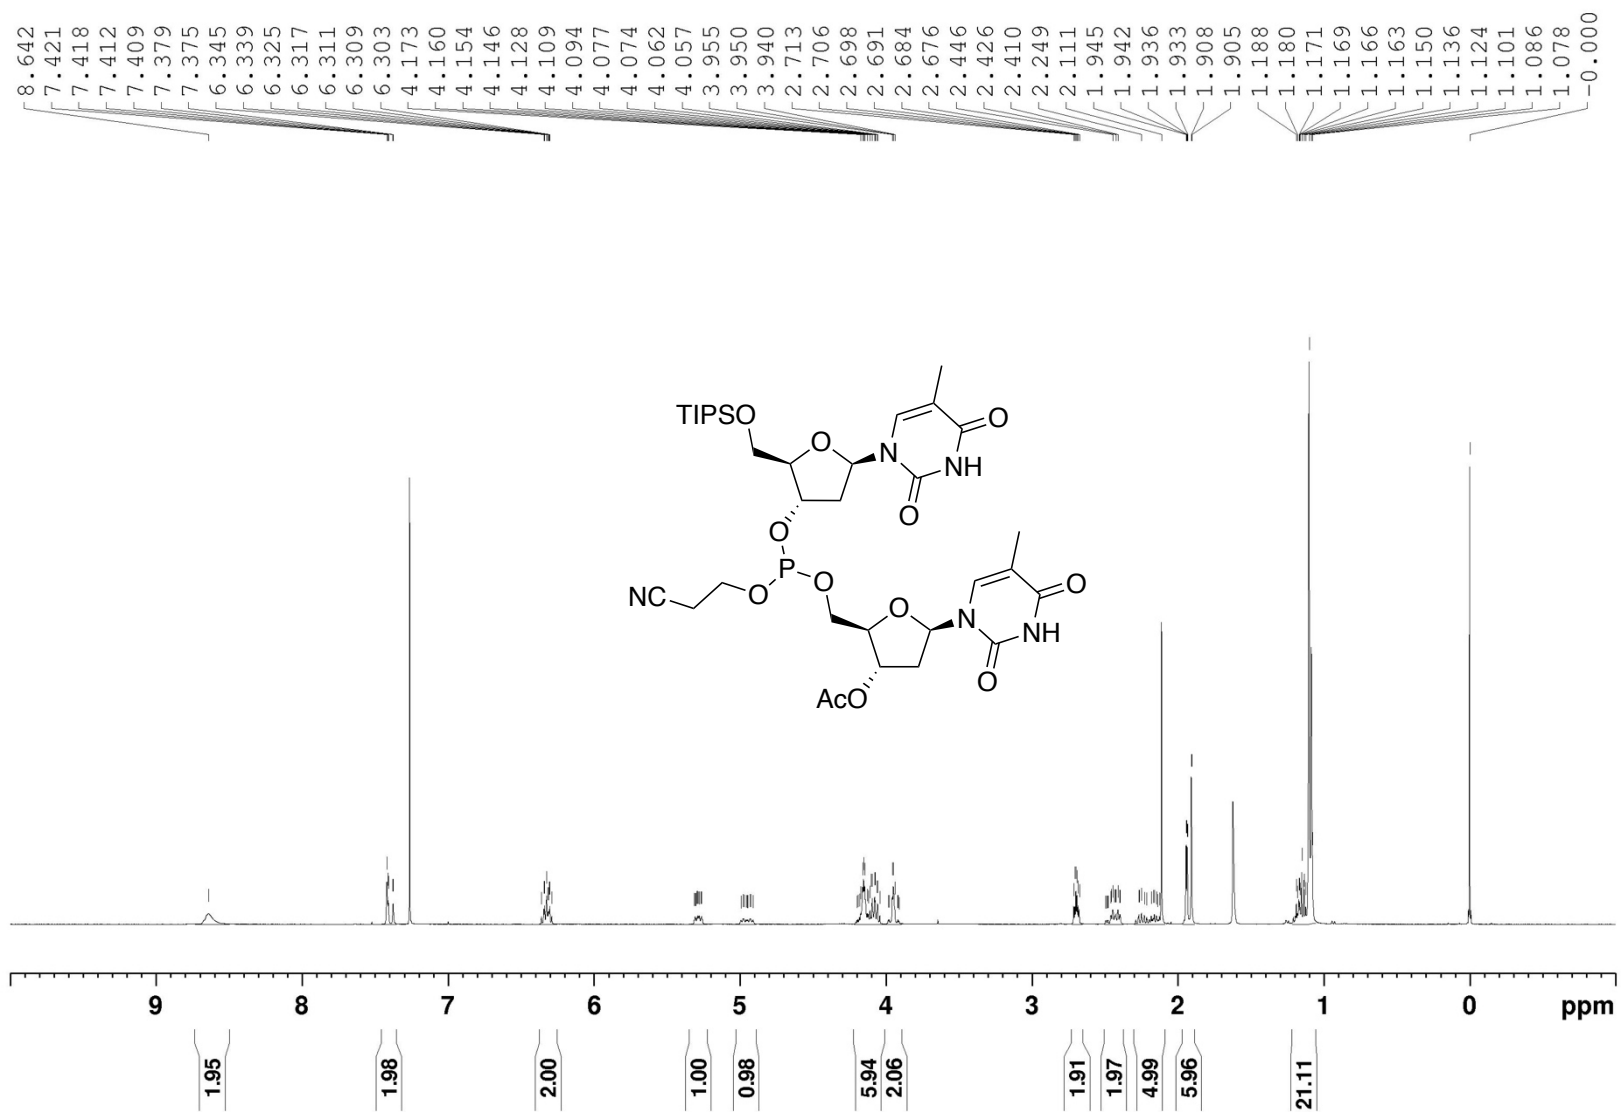

<sup>1</sup>H NMR (400 MHz, CDCl<sub>3</sub>) spectrum of **1a-4**

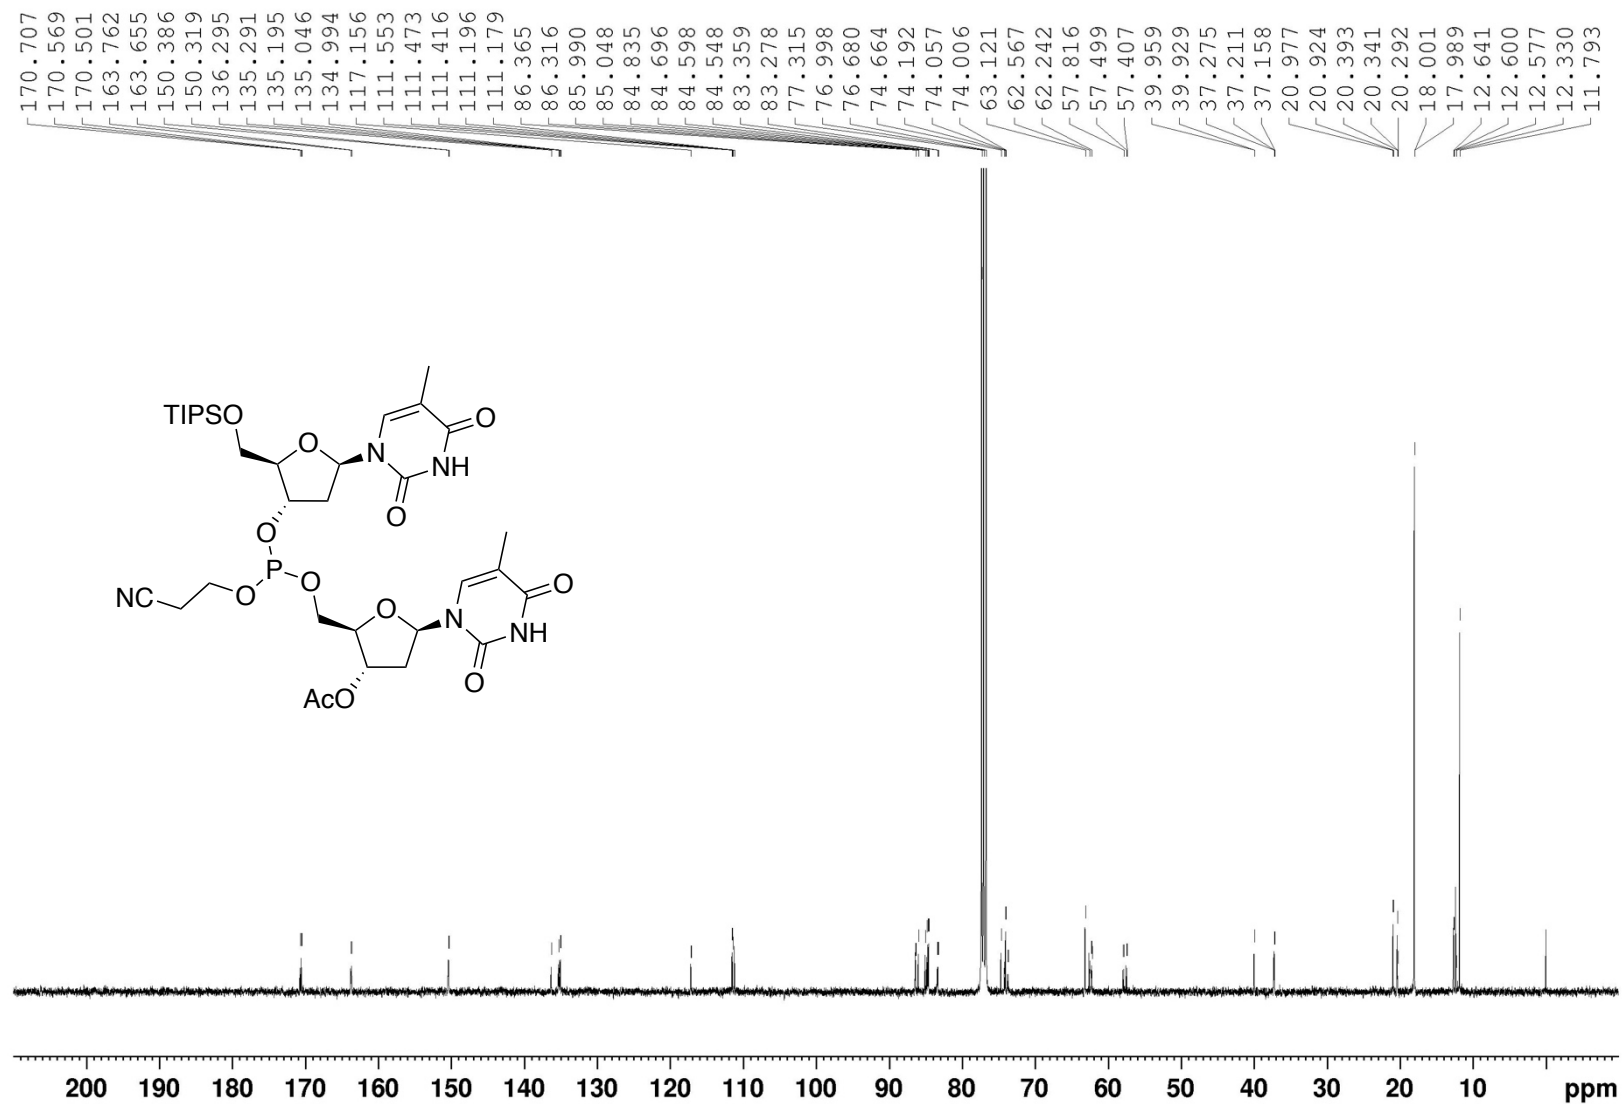

<sup>13</sup>C NMR (100.6 MHz, CDCl<sub>3</sub>) spectrum of **1a-4**

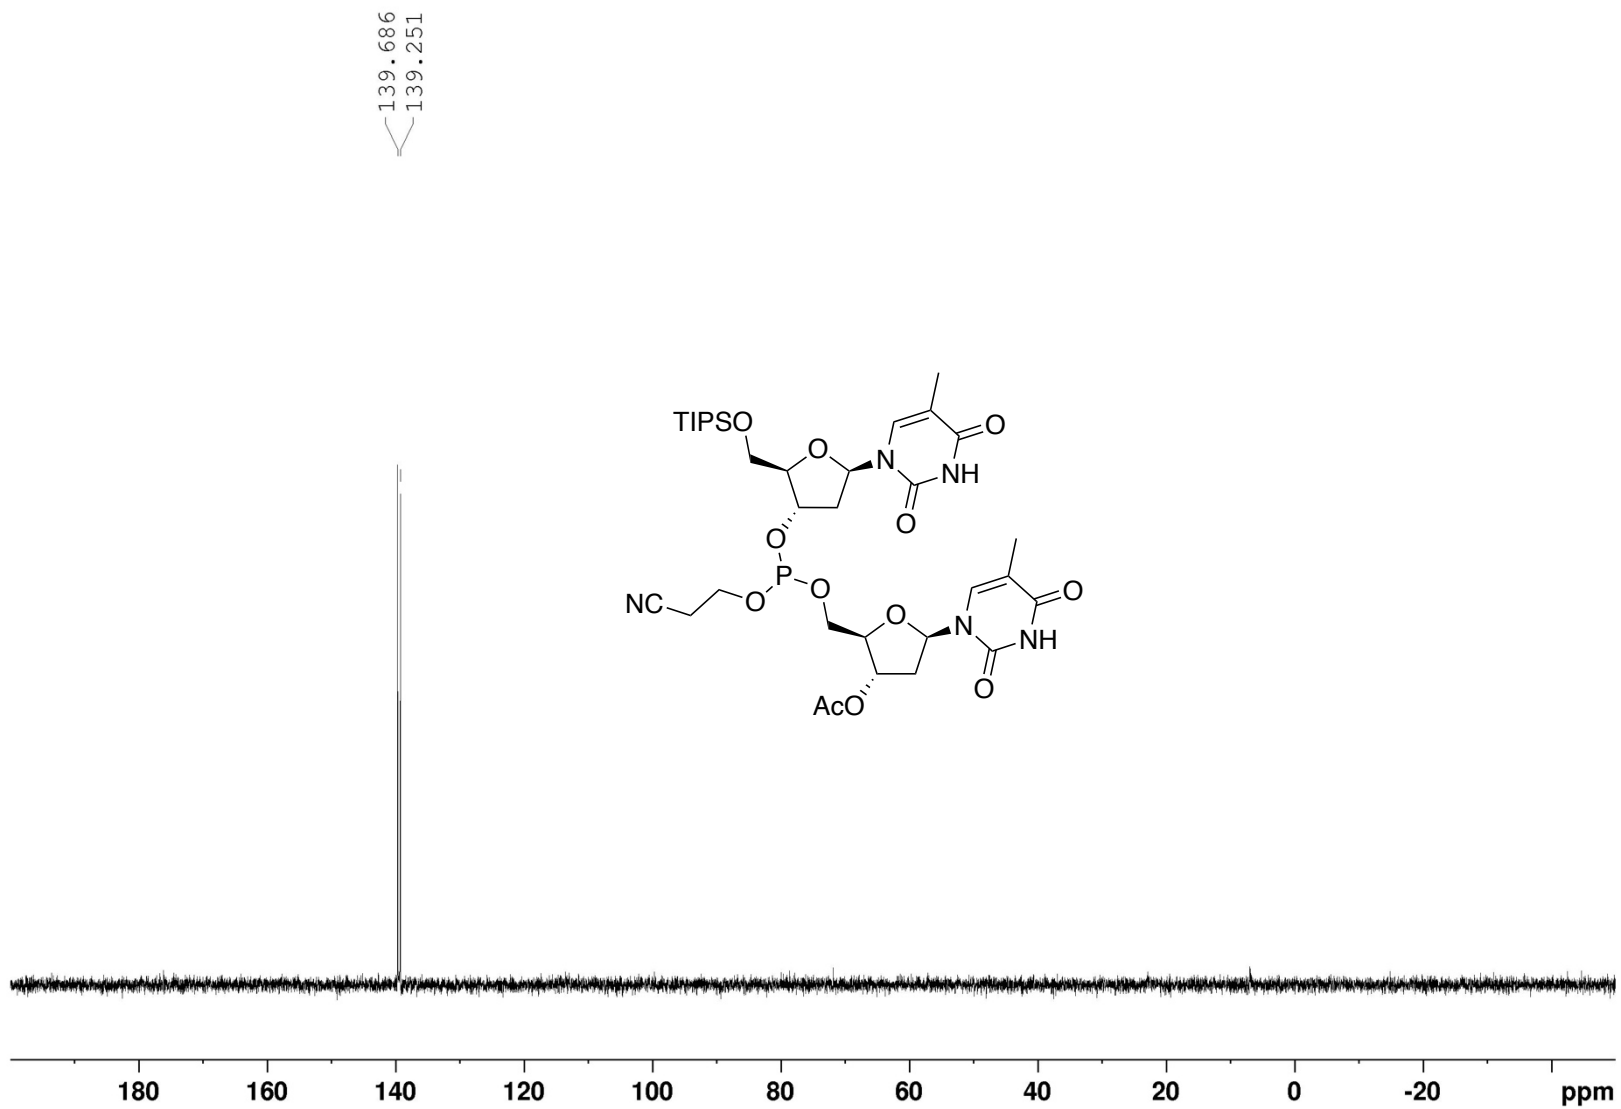

<sup>31</sup>P NMR (162 MHz, CDCl<sub>3</sub>) spectrum of **1a-4**

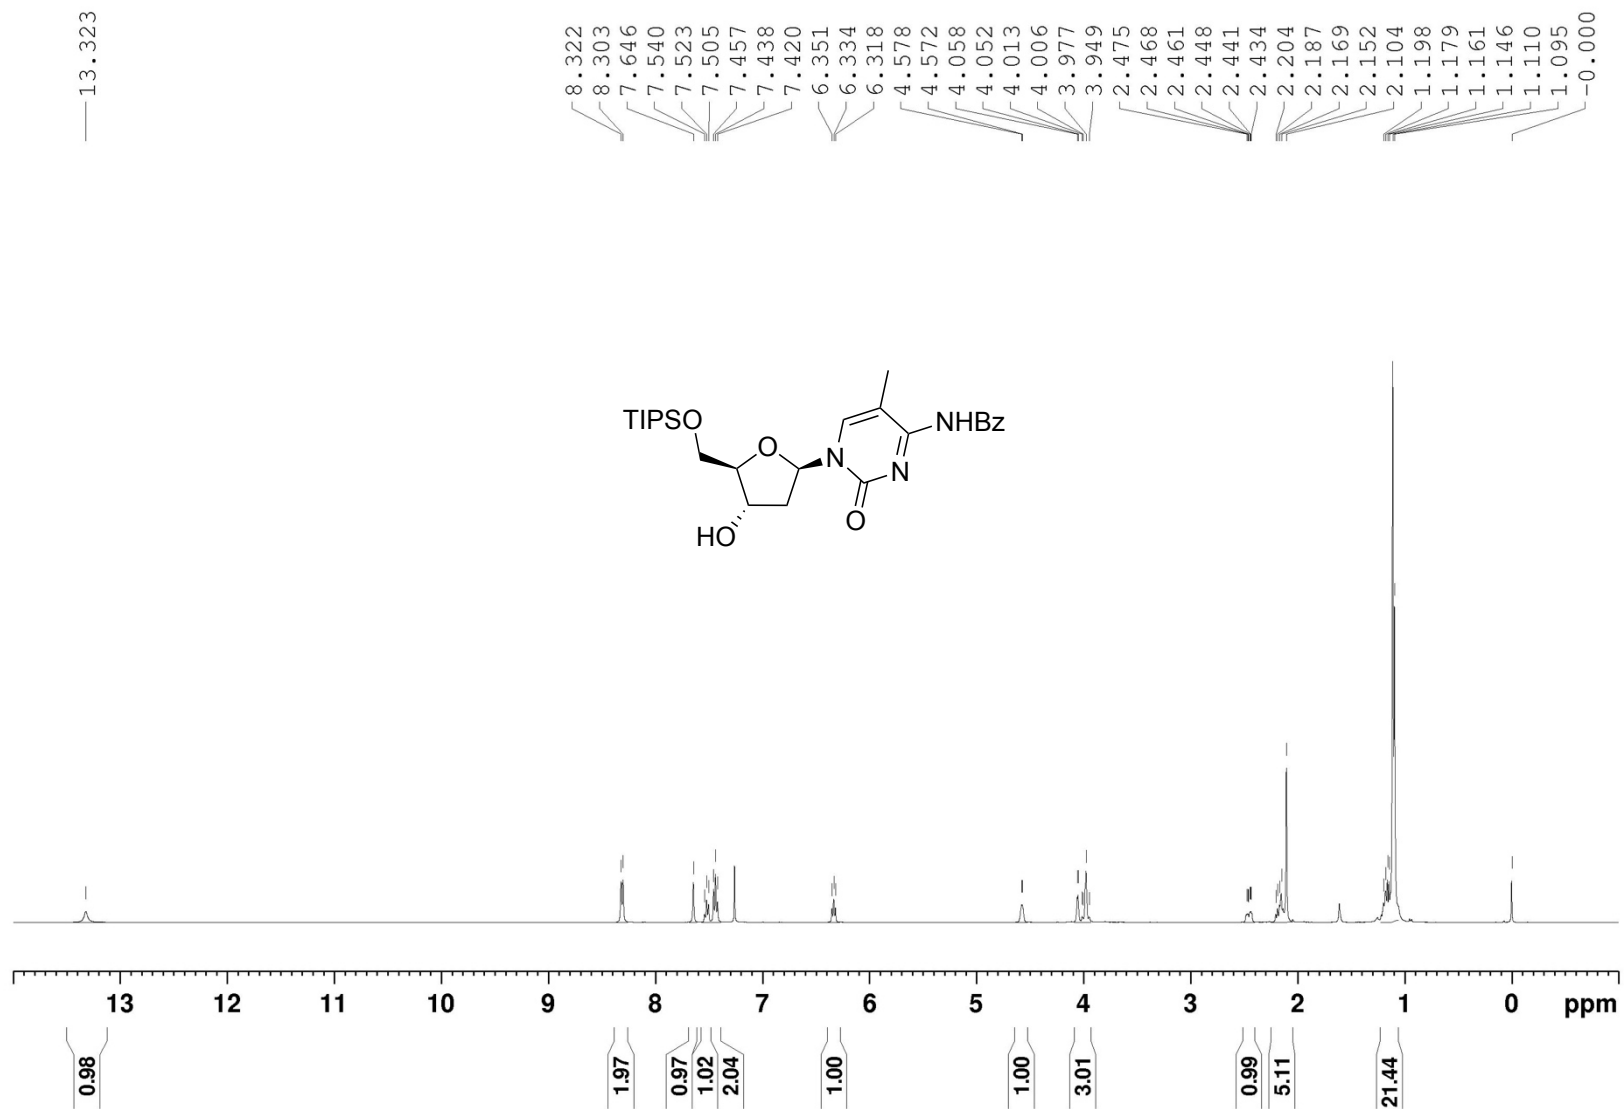

<sup>1</sup>H NMR (400 MHz, CDCl<sub>3</sub>) spectrum of *N*-Benzoyl-5'-*O*-TIPS-5-methyl-2'-deoxycytidine

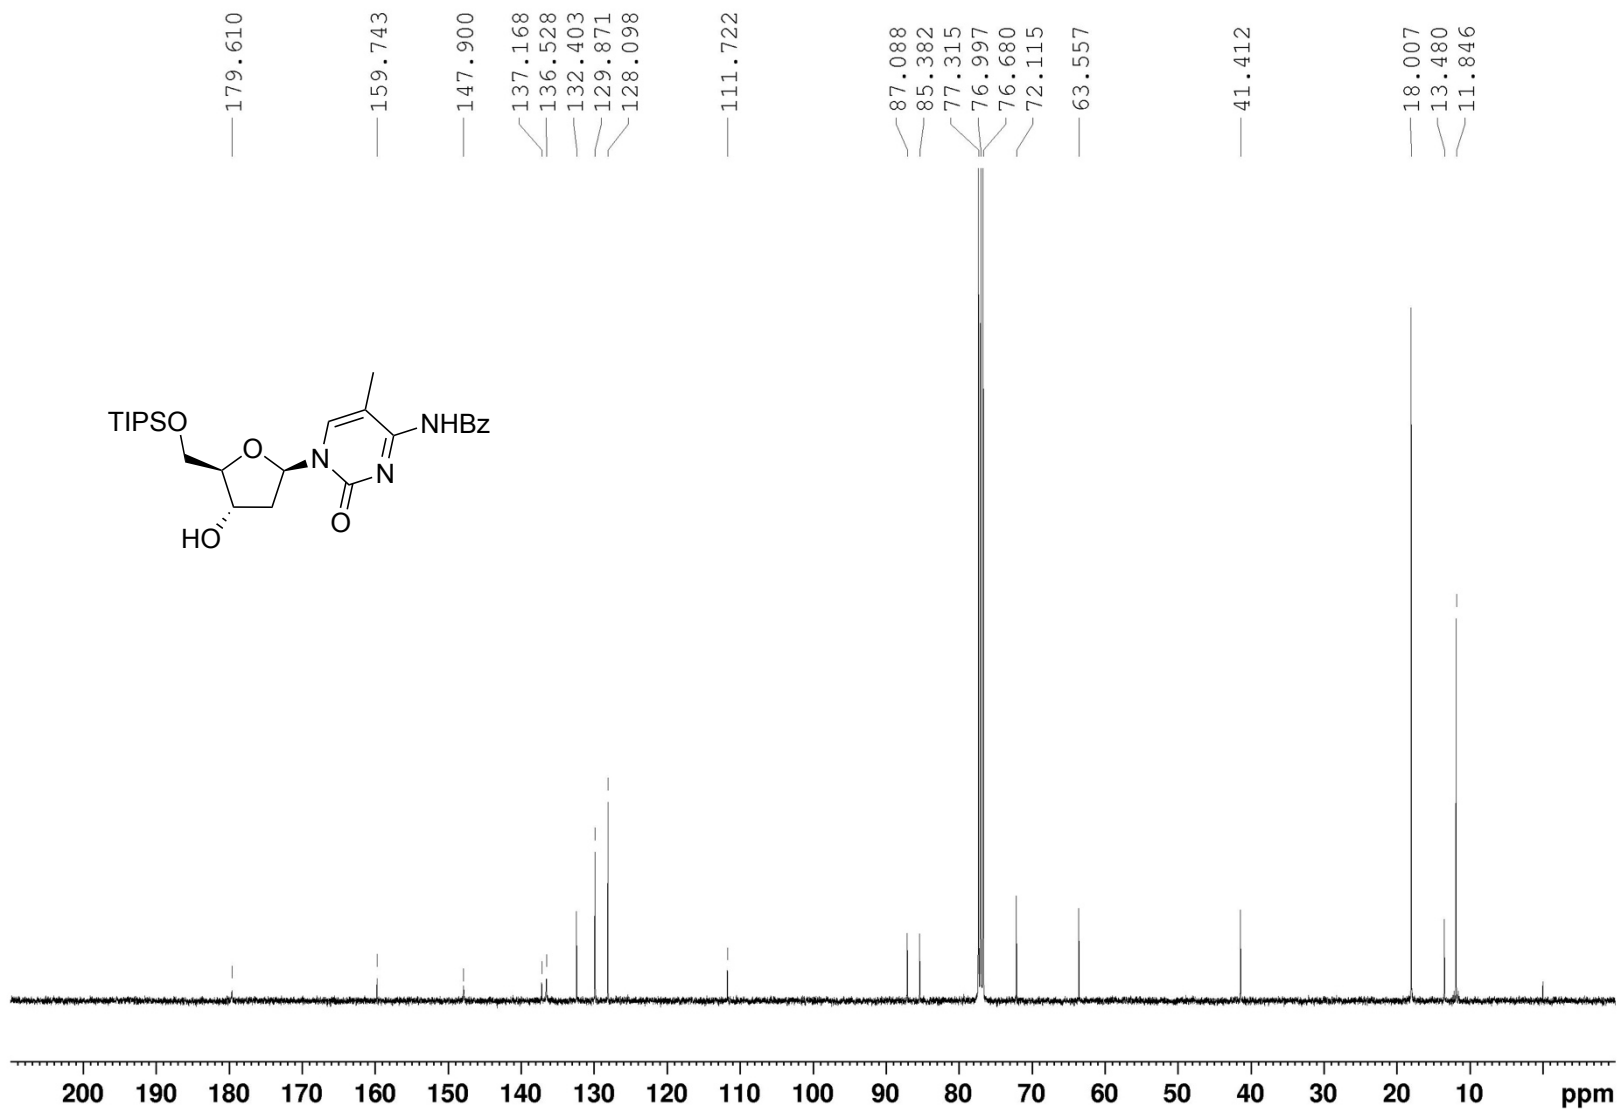

<sup>13</sup>C NMR (100.6 MHz, CDCl<sub>3</sub>) spectrum of *N*-Benzoyl-5'-*O*-TIPS-5-methyl-2'-deoxycytidine



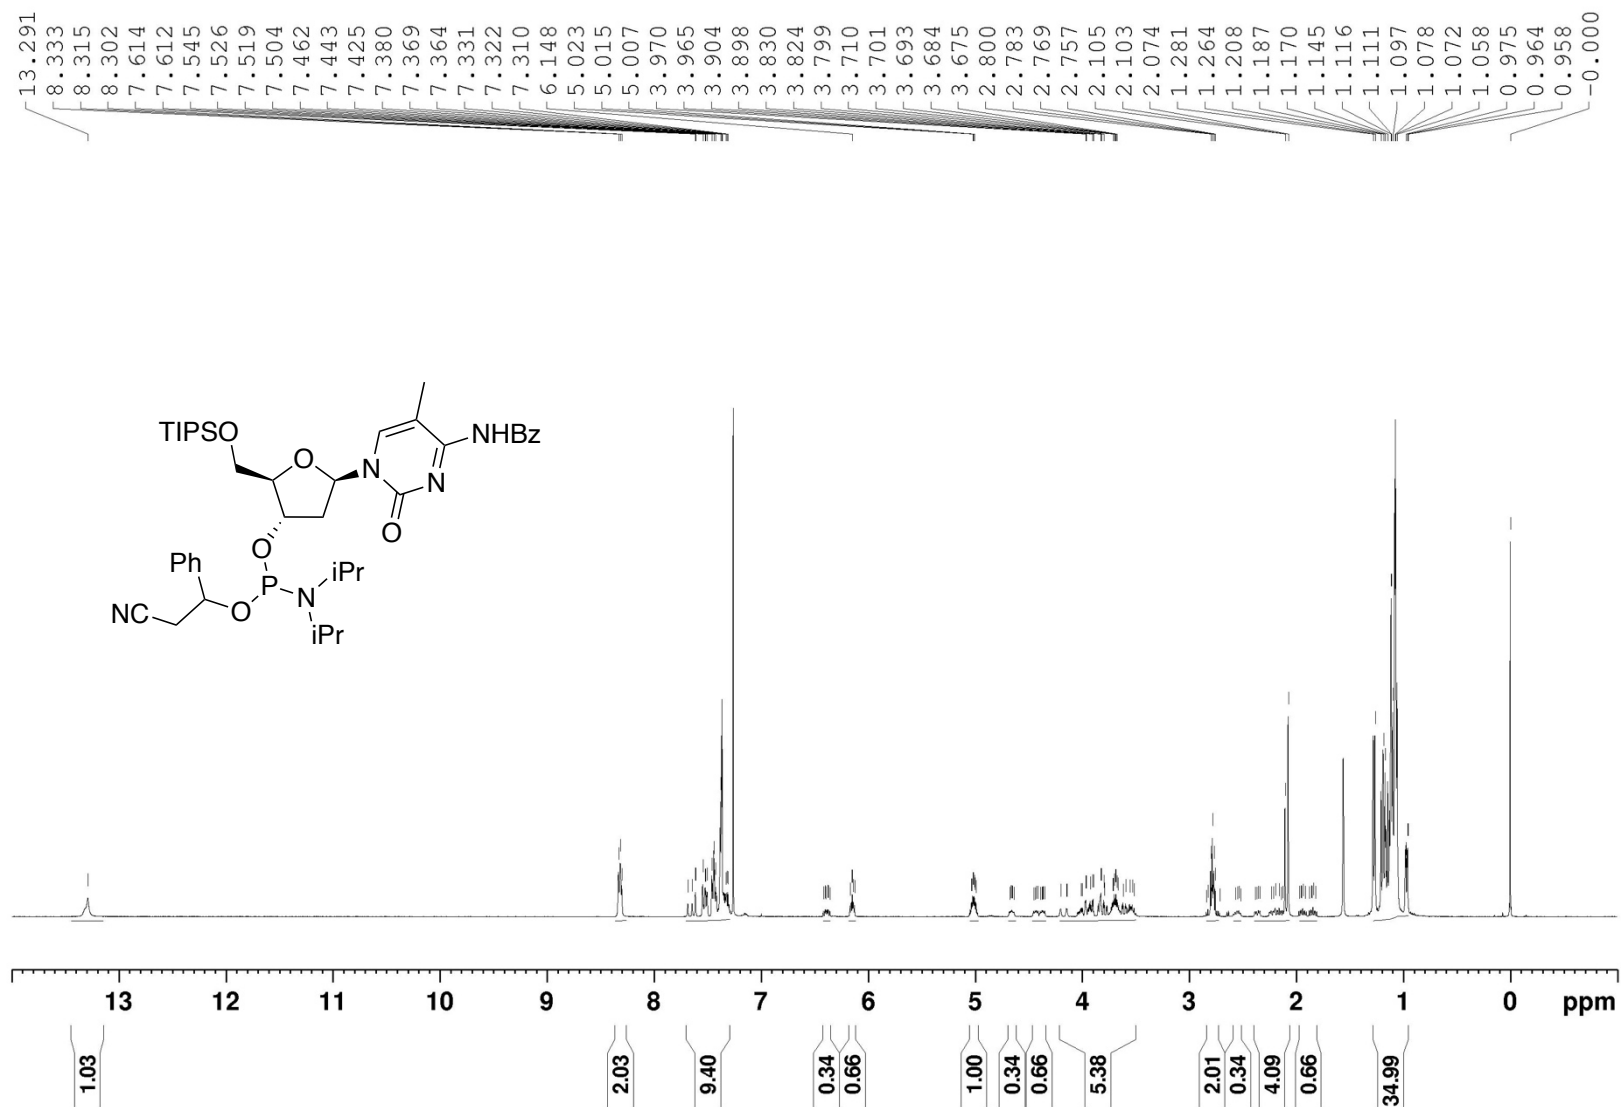

<sup>1</sup>H NMR (400 MHz, CDCl<sub>3</sub>) spectrum of *N*-Benzoyl-5'-*O*-TIPS-5-methyl-2'-deoxycytidine Phosphoramidite

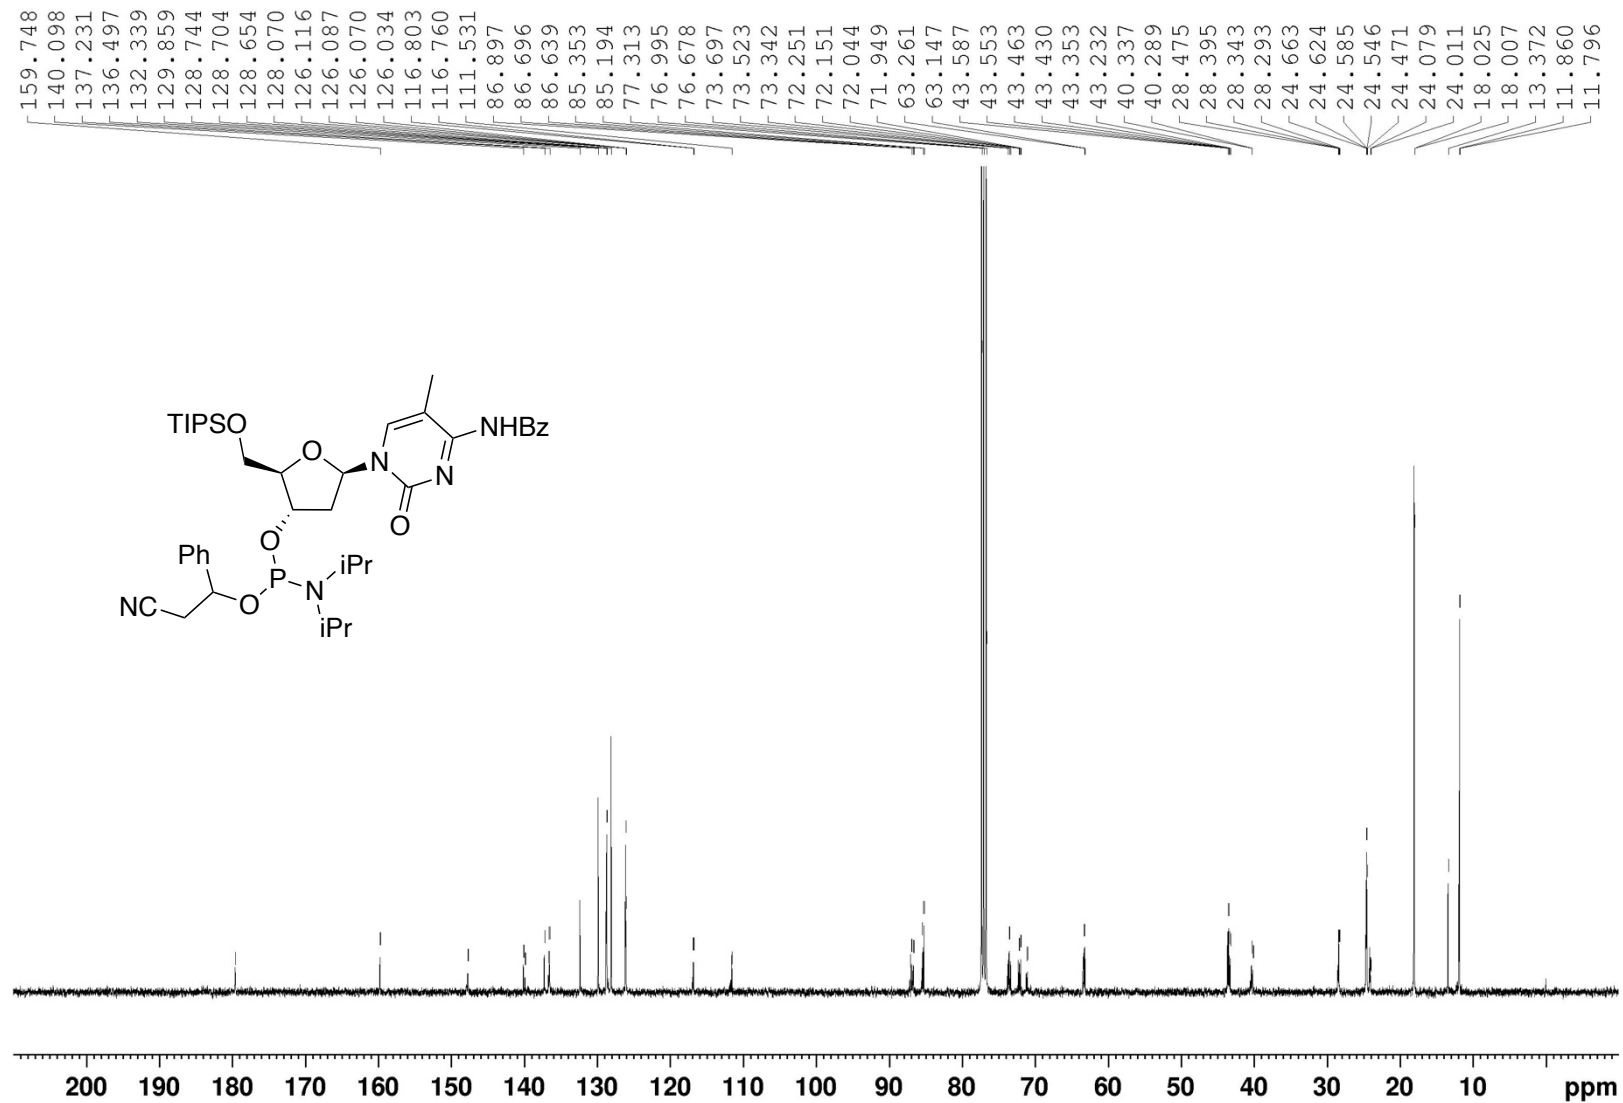

<sup>13</sup>C NMR (100.6 MHz, CDCl<sub>3</sub>) spectrum of *N*-Benzoyl-5'-*O*-TIPS-5-methyl-2'-deoxycytidine Phosphoramidite

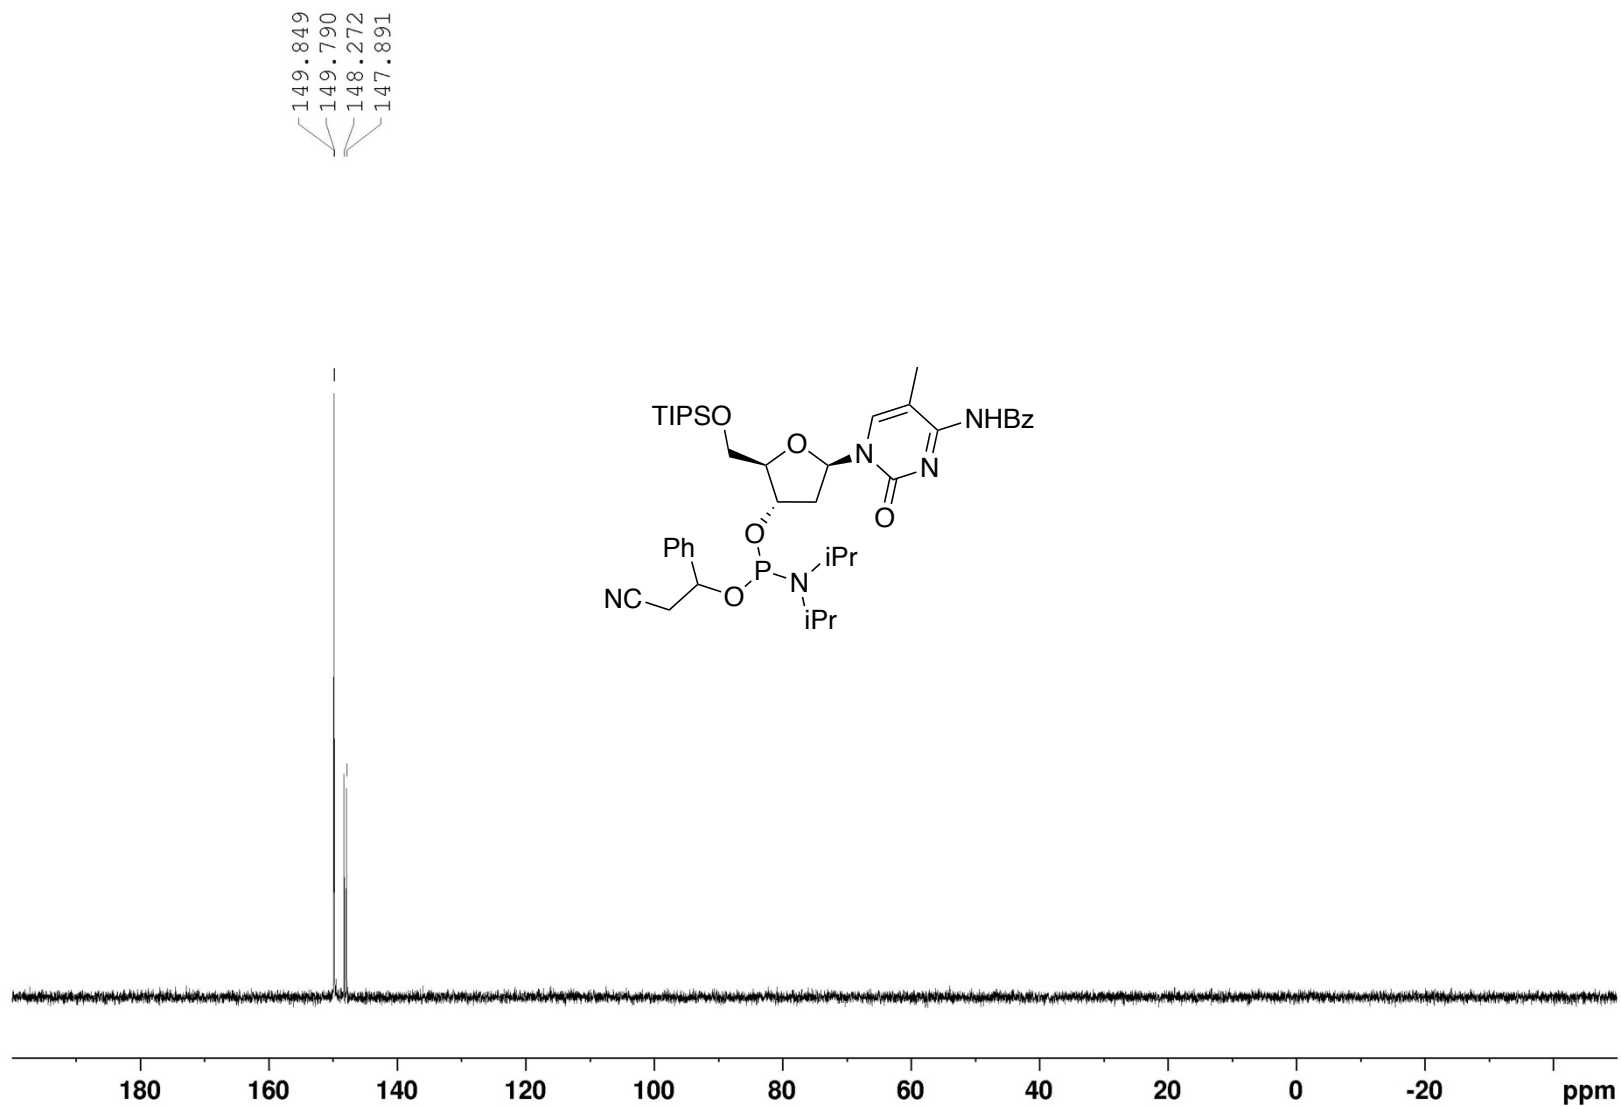

$^{31}\text{P}$  NMR (162 MHz,  $\text{CDCl}_3$ ) spectrum of *N*-Benzoyl-5'-*O*-TIPS-5-methyl-2'-deoxycytidine Phosphoramidite

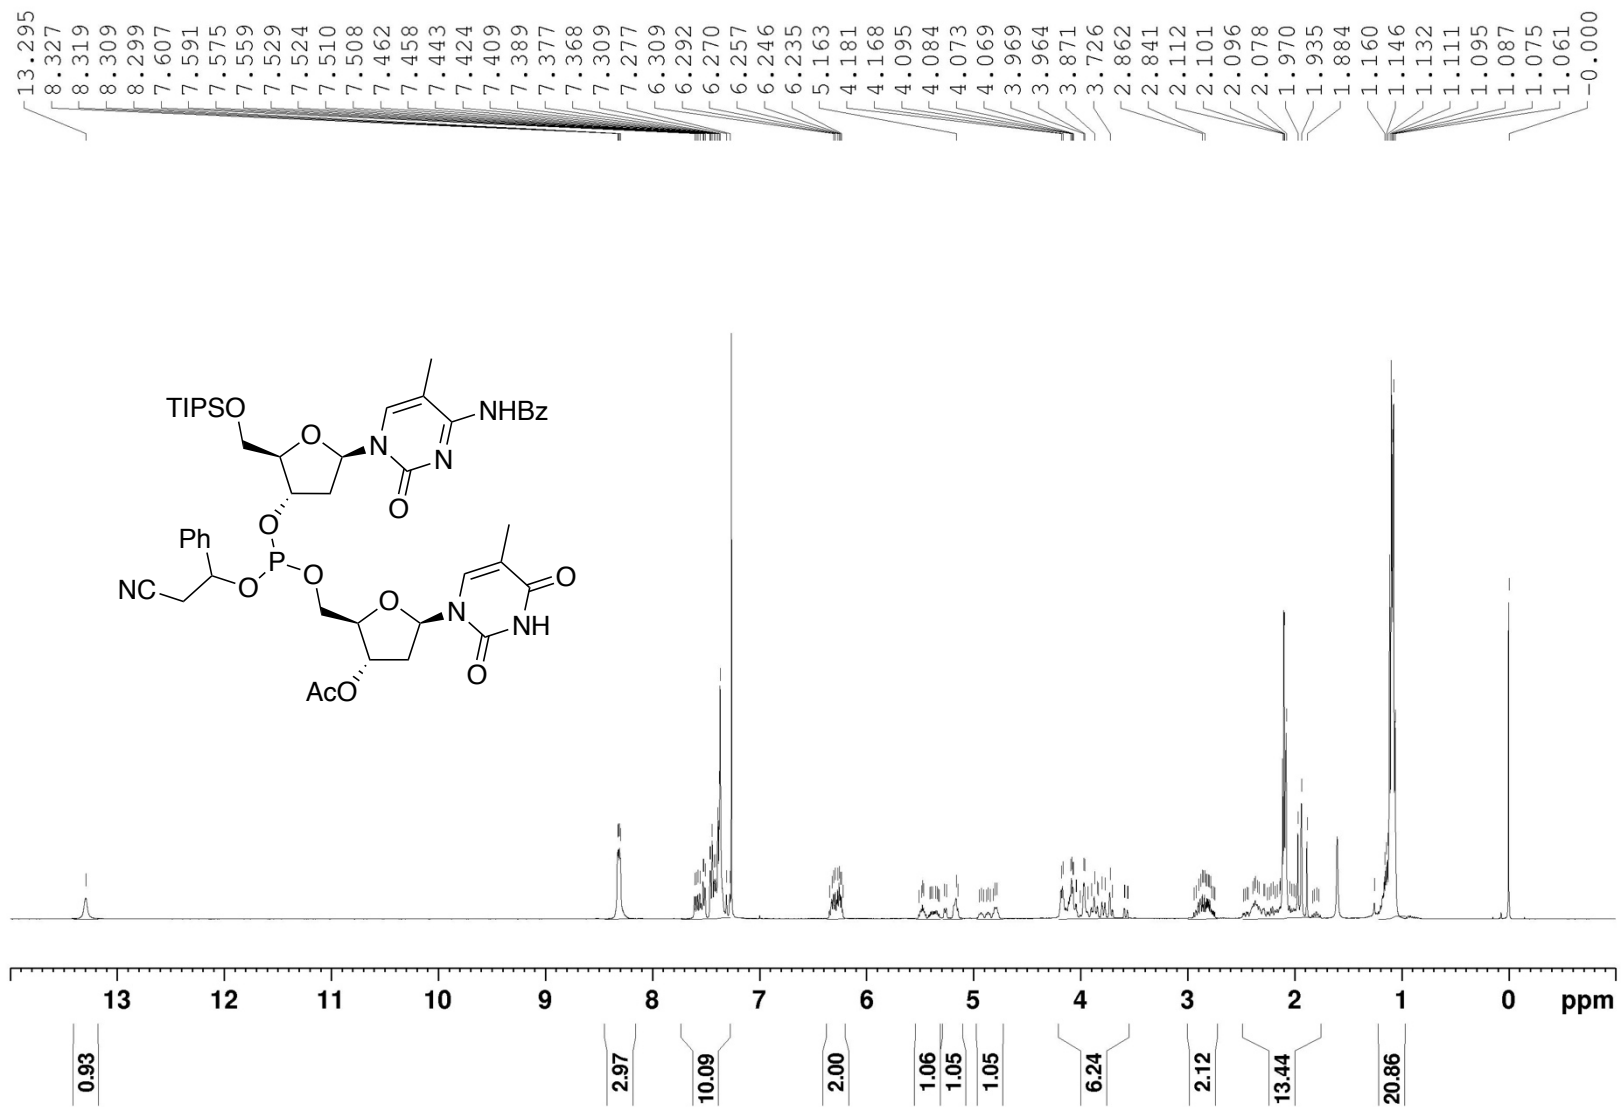

<sup>1</sup>H NMR (400 MHz, CDCl<sub>3</sub>) spectrum of **1b**

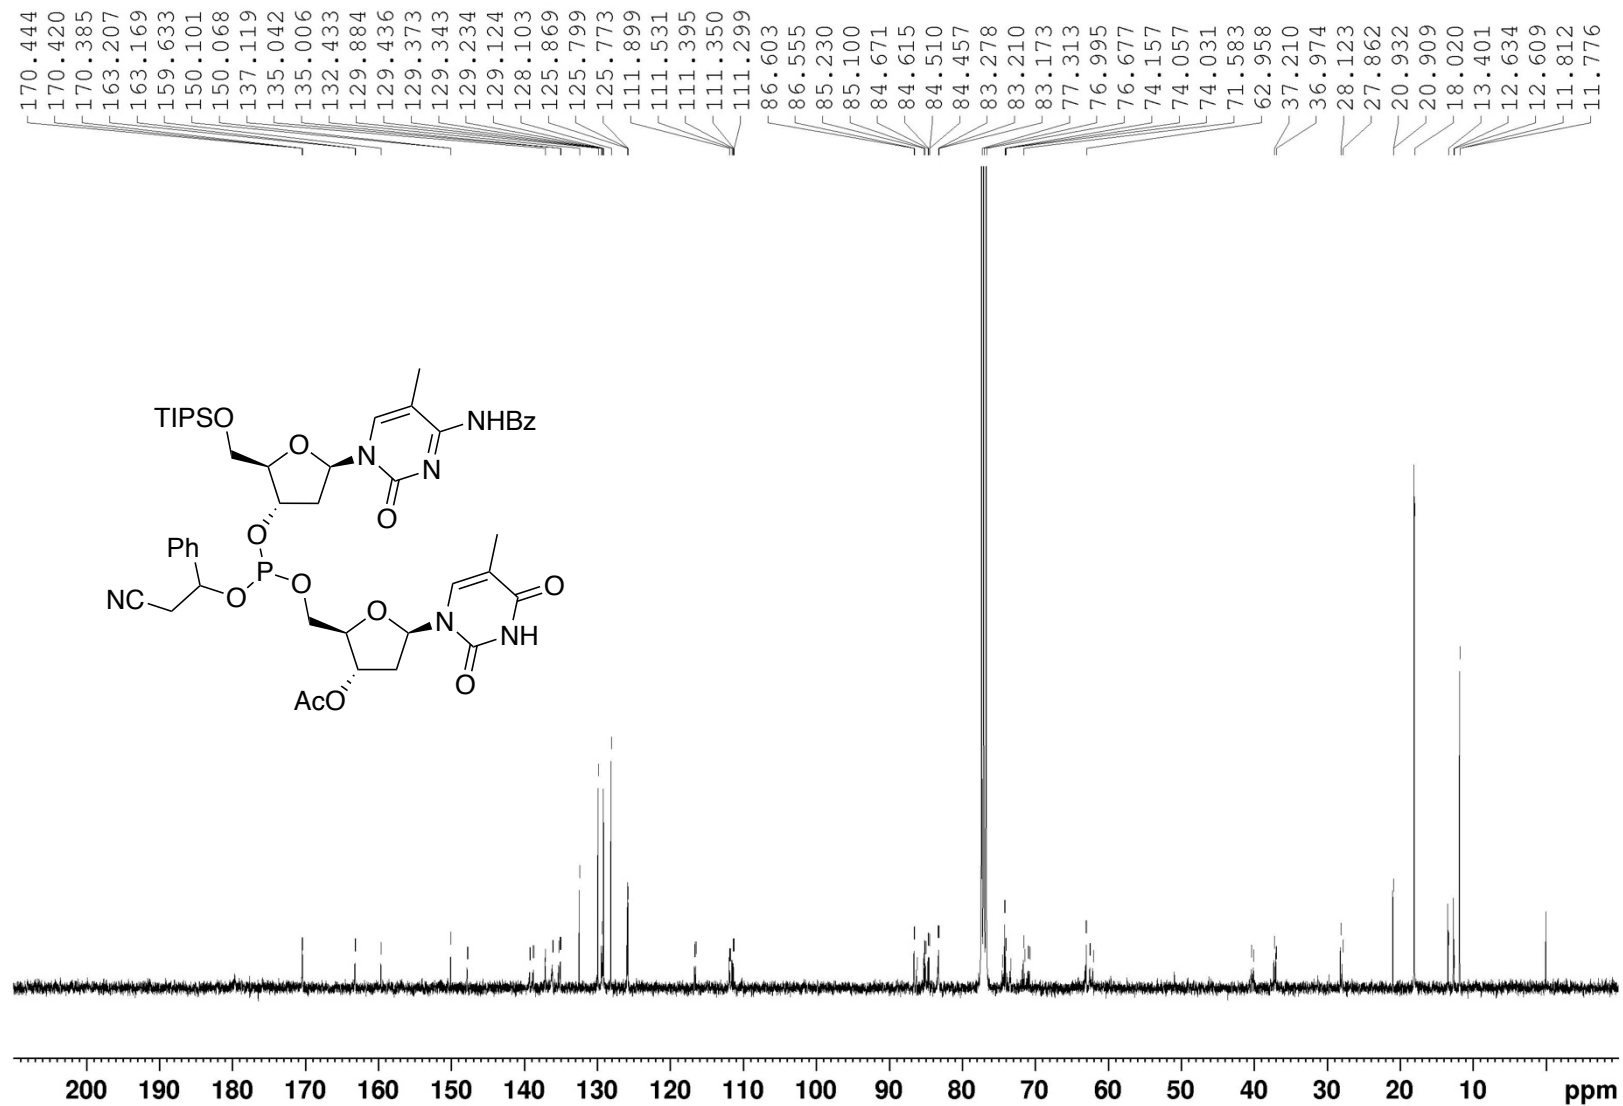

$^{13}\text{C}$  NMR (100.6 MHz,  $\text{CDCl}_3$ ) spectrum of **1b**

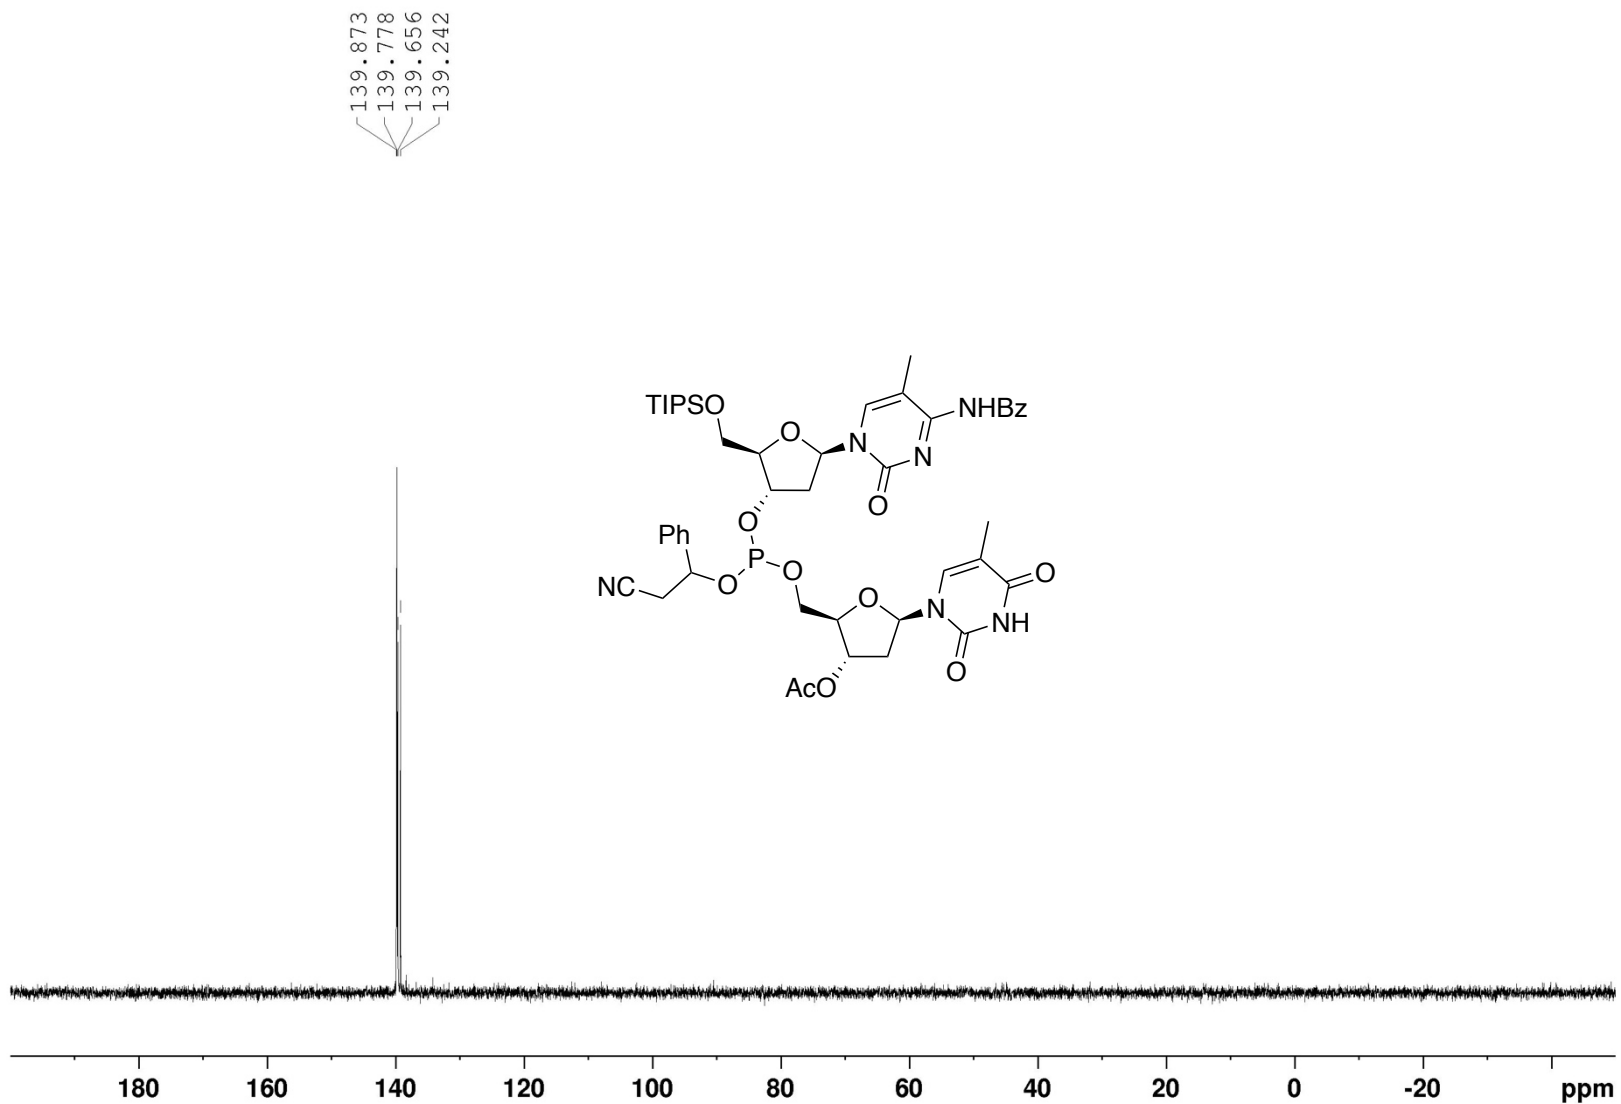

$^{31}\text{P}$  NMR (162 MHz,  $\text{CDCl}_3$ ) spectrum of **1b**

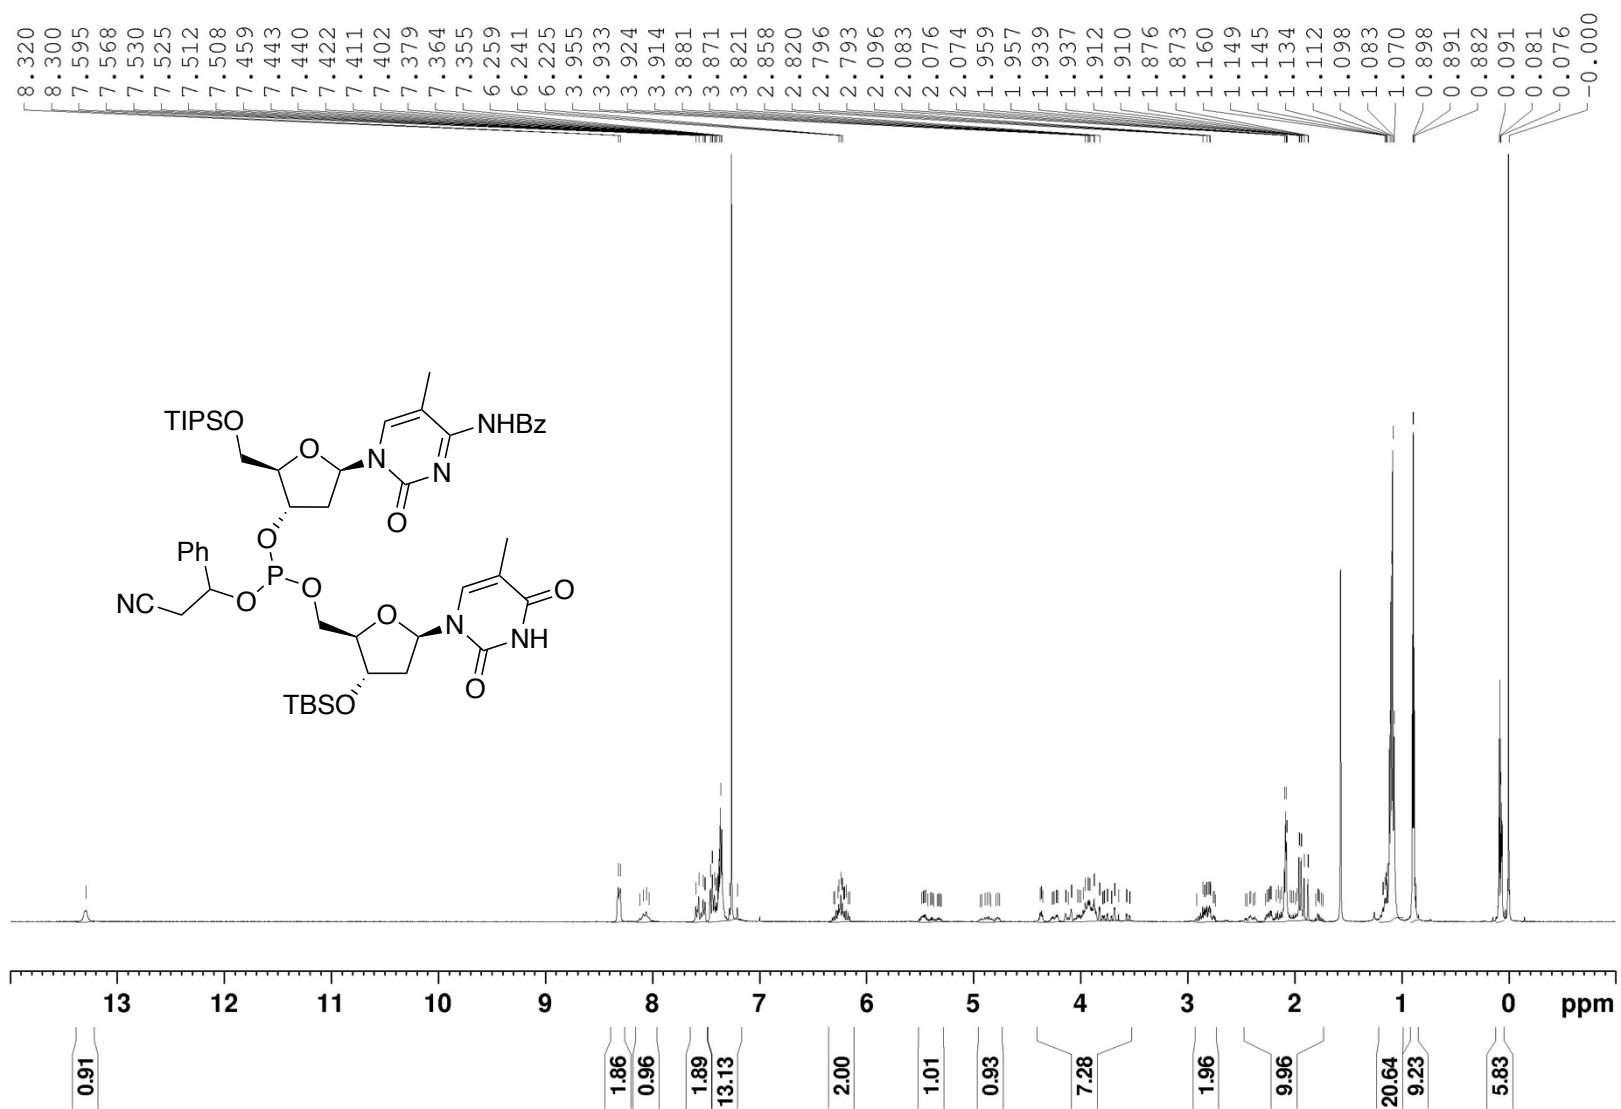

<sup>1</sup>H NMR (400 MHz, CDCl<sub>3</sub>) spectrum of **1c**

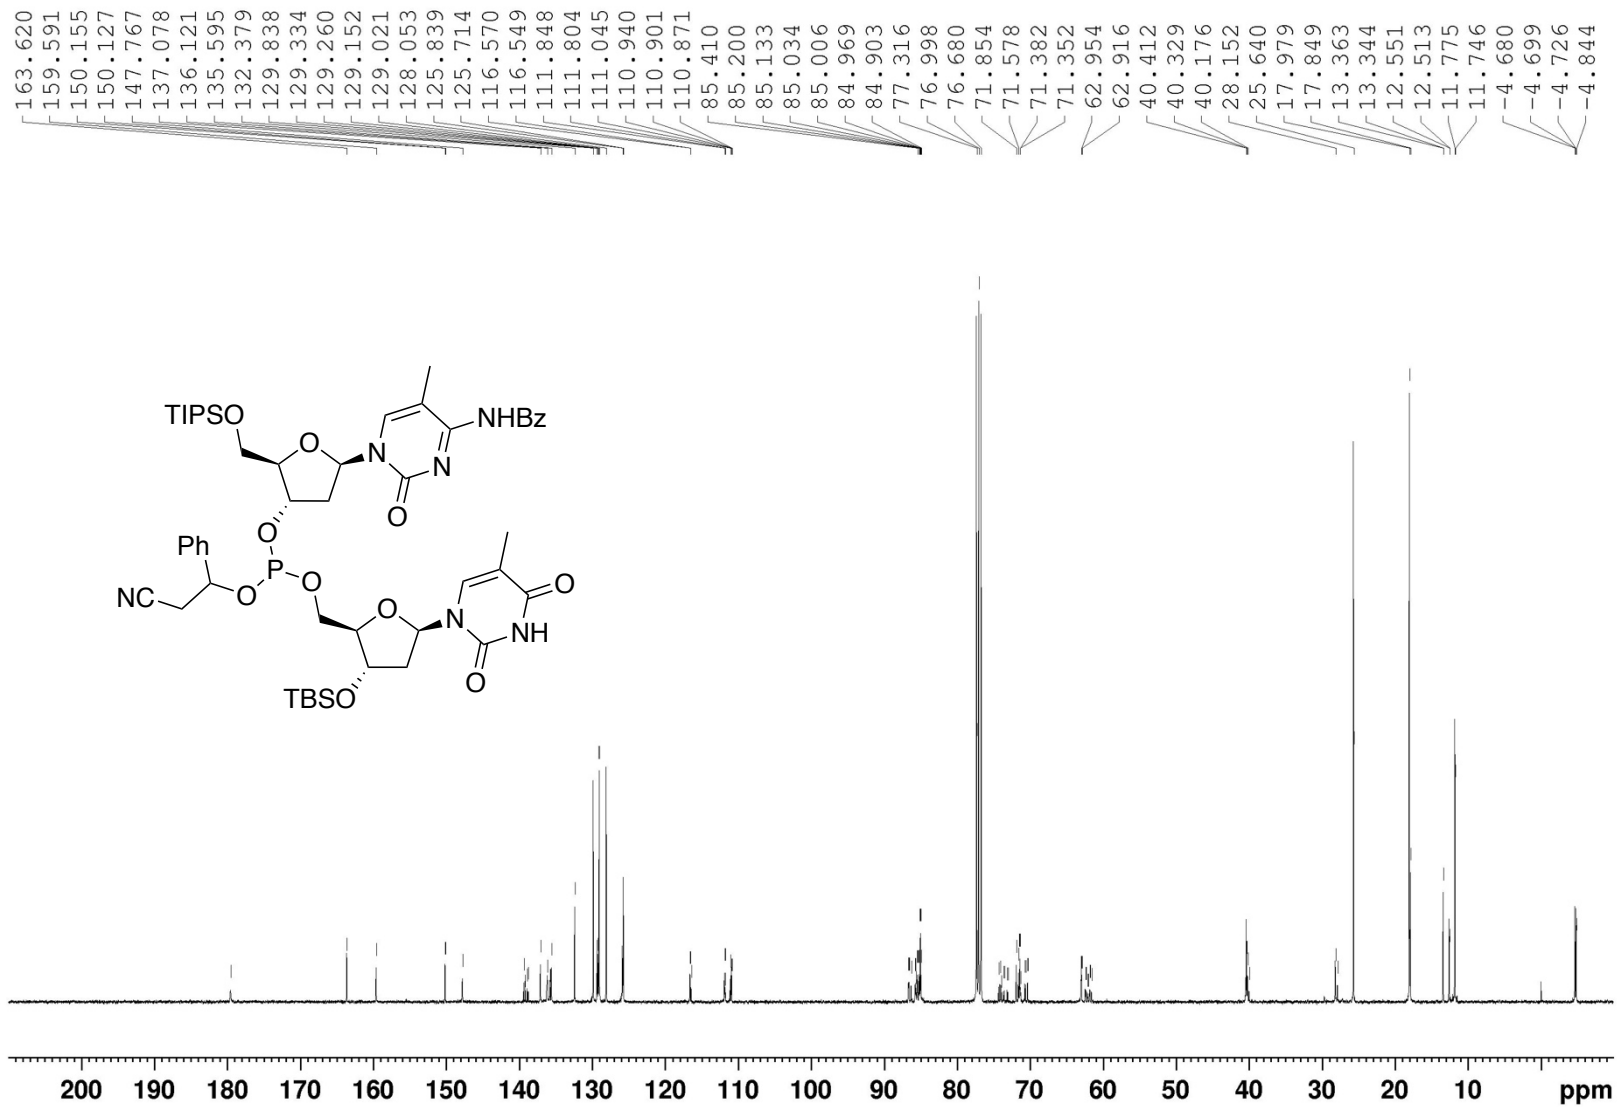

<sup>13</sup>C NMR (100.6 MHz, CDCl<sub>3</sub>) spectrum of **1c**



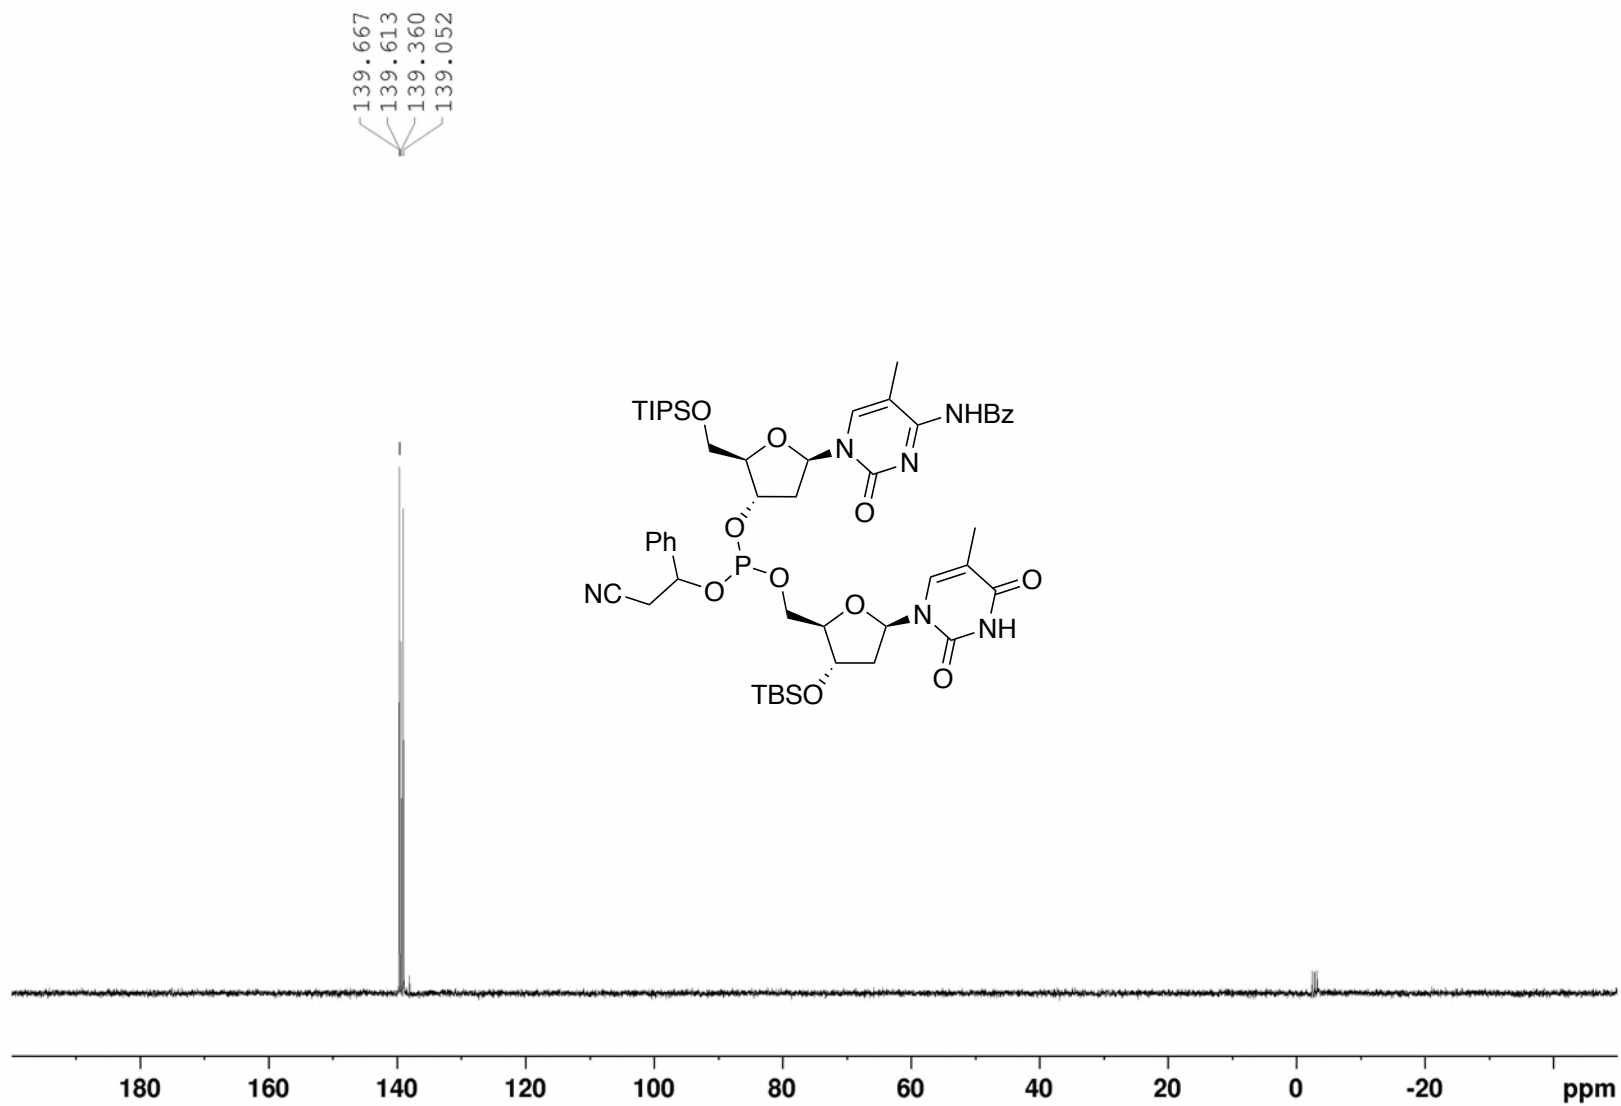

$^{31}\text{P}$  NMR (162 MHz,  $\text{CDCl}_3$ ) spectrum of **1c**

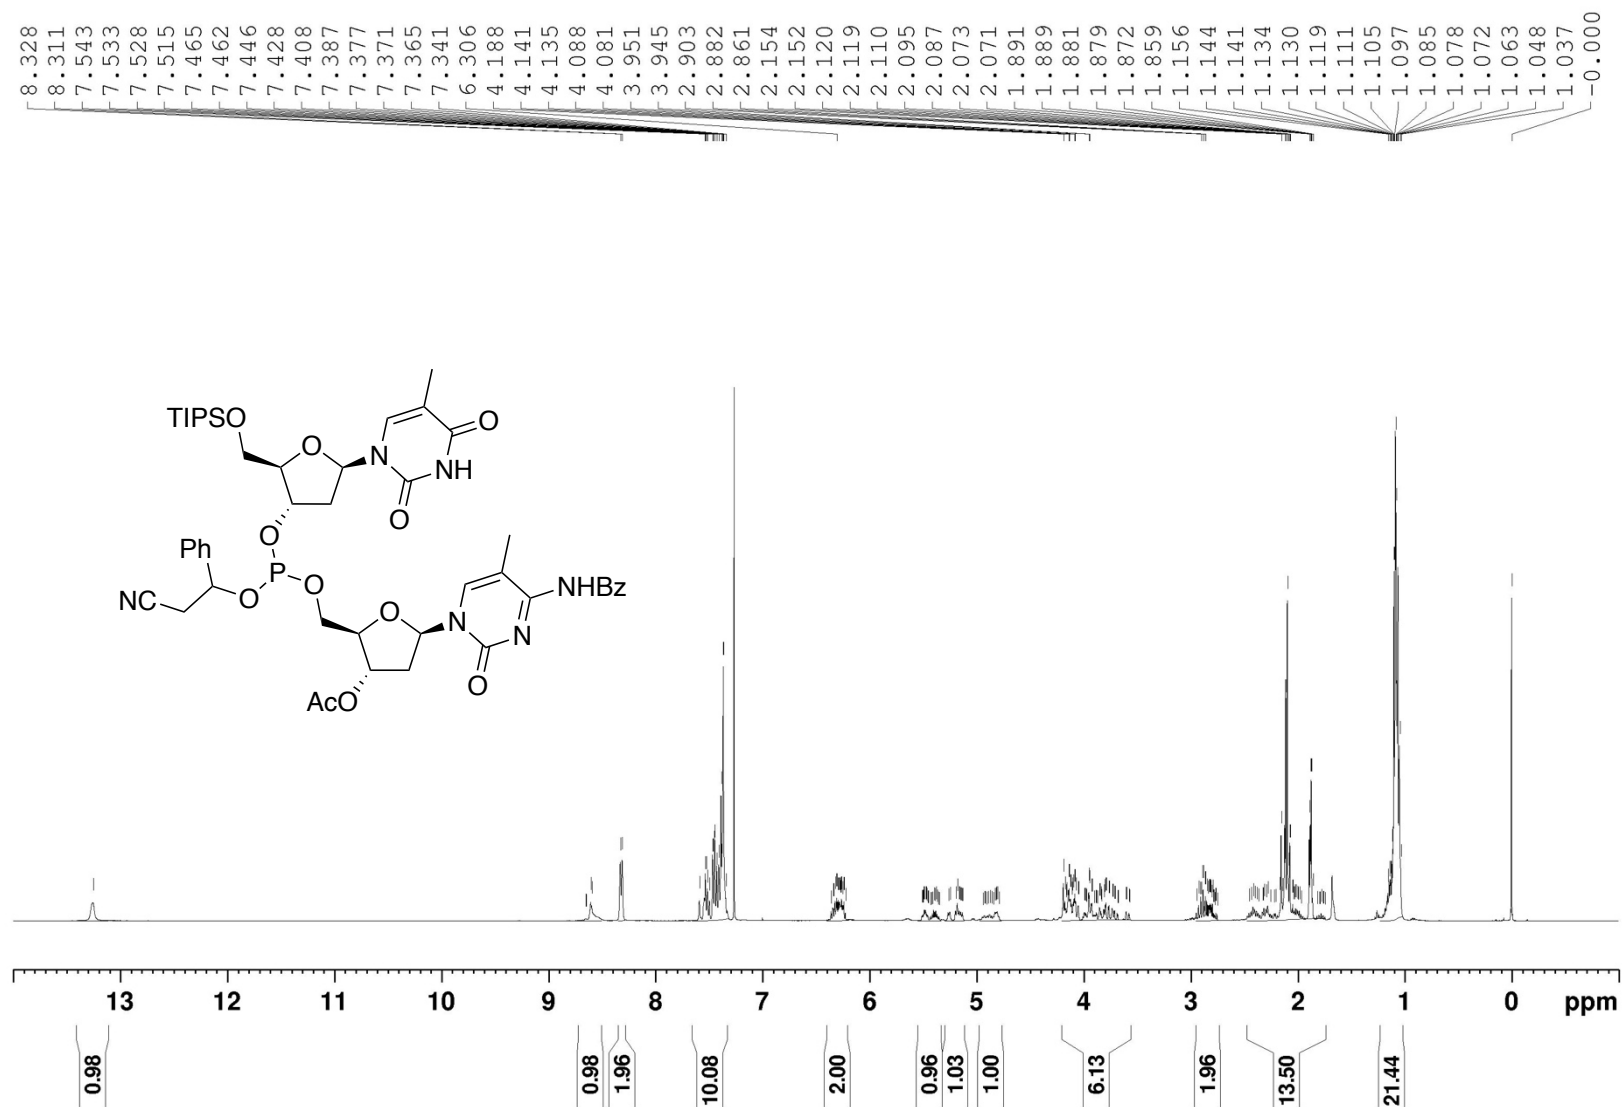

<sup>1</sup>H NMR (400 MHz, CDCl<sub>3</sub>) spectrum of **1d**

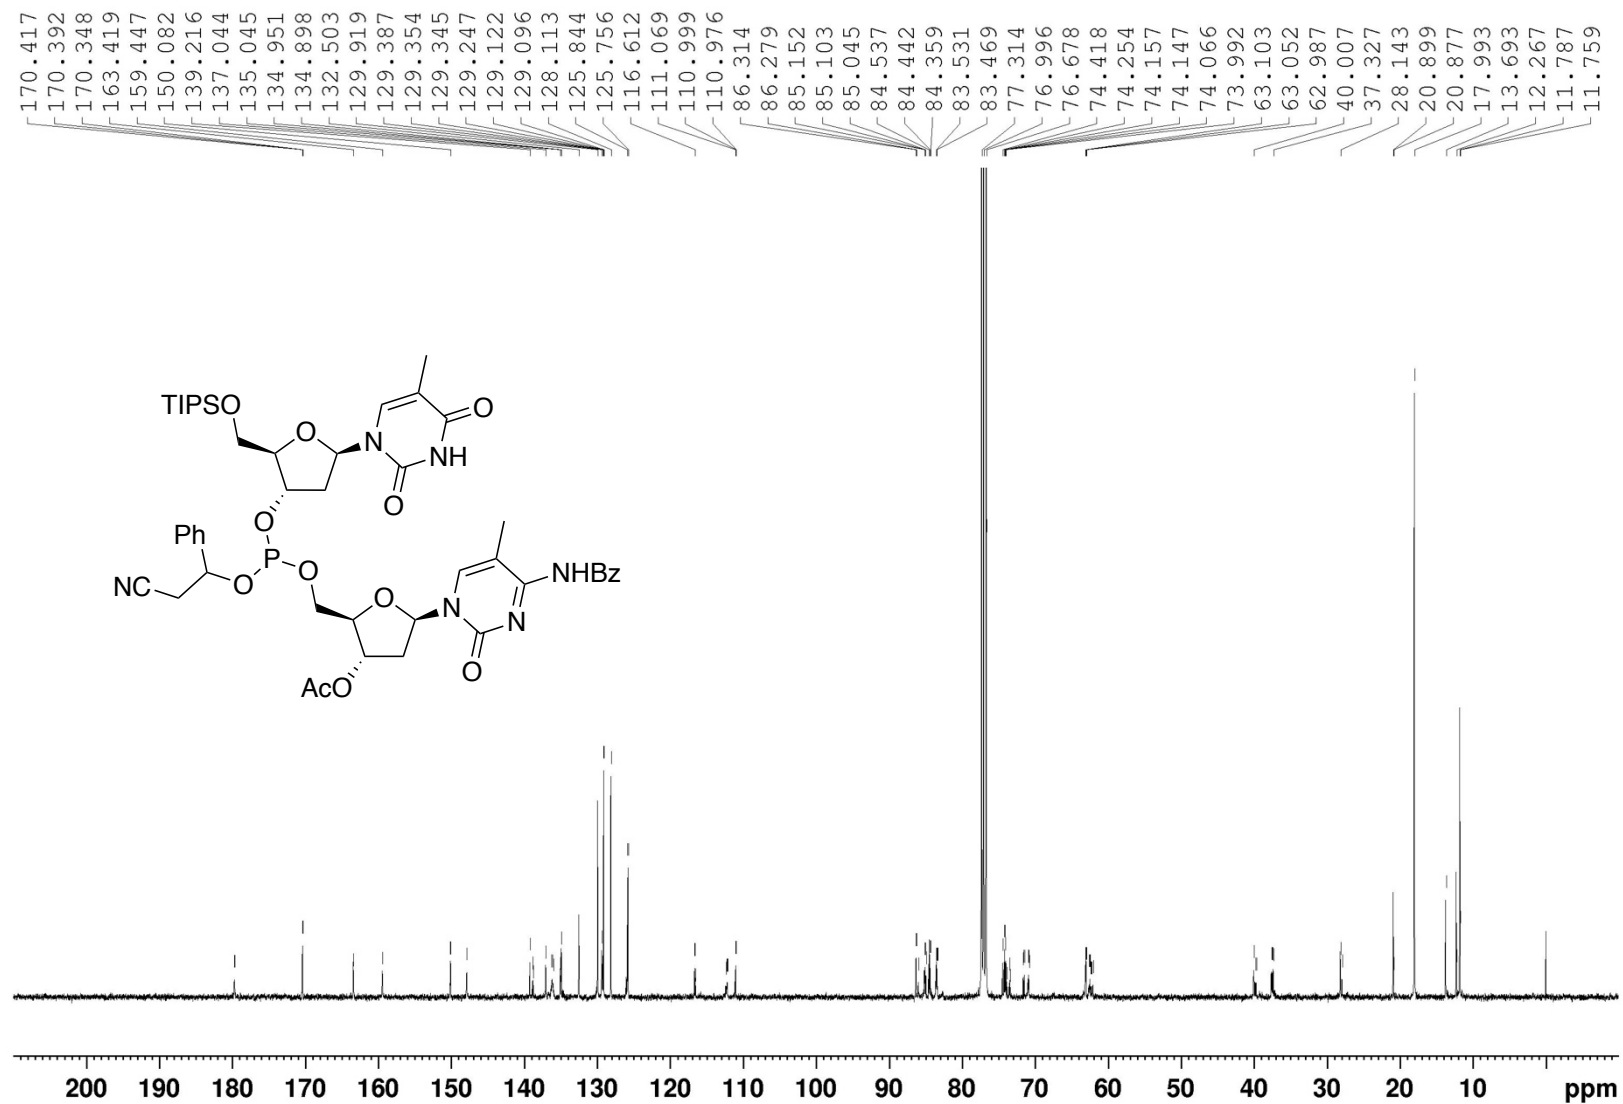

<sup>13</sup>C NMR (100.6 MHz, CDCl<sub>3</sub>) spectrum of **1d**

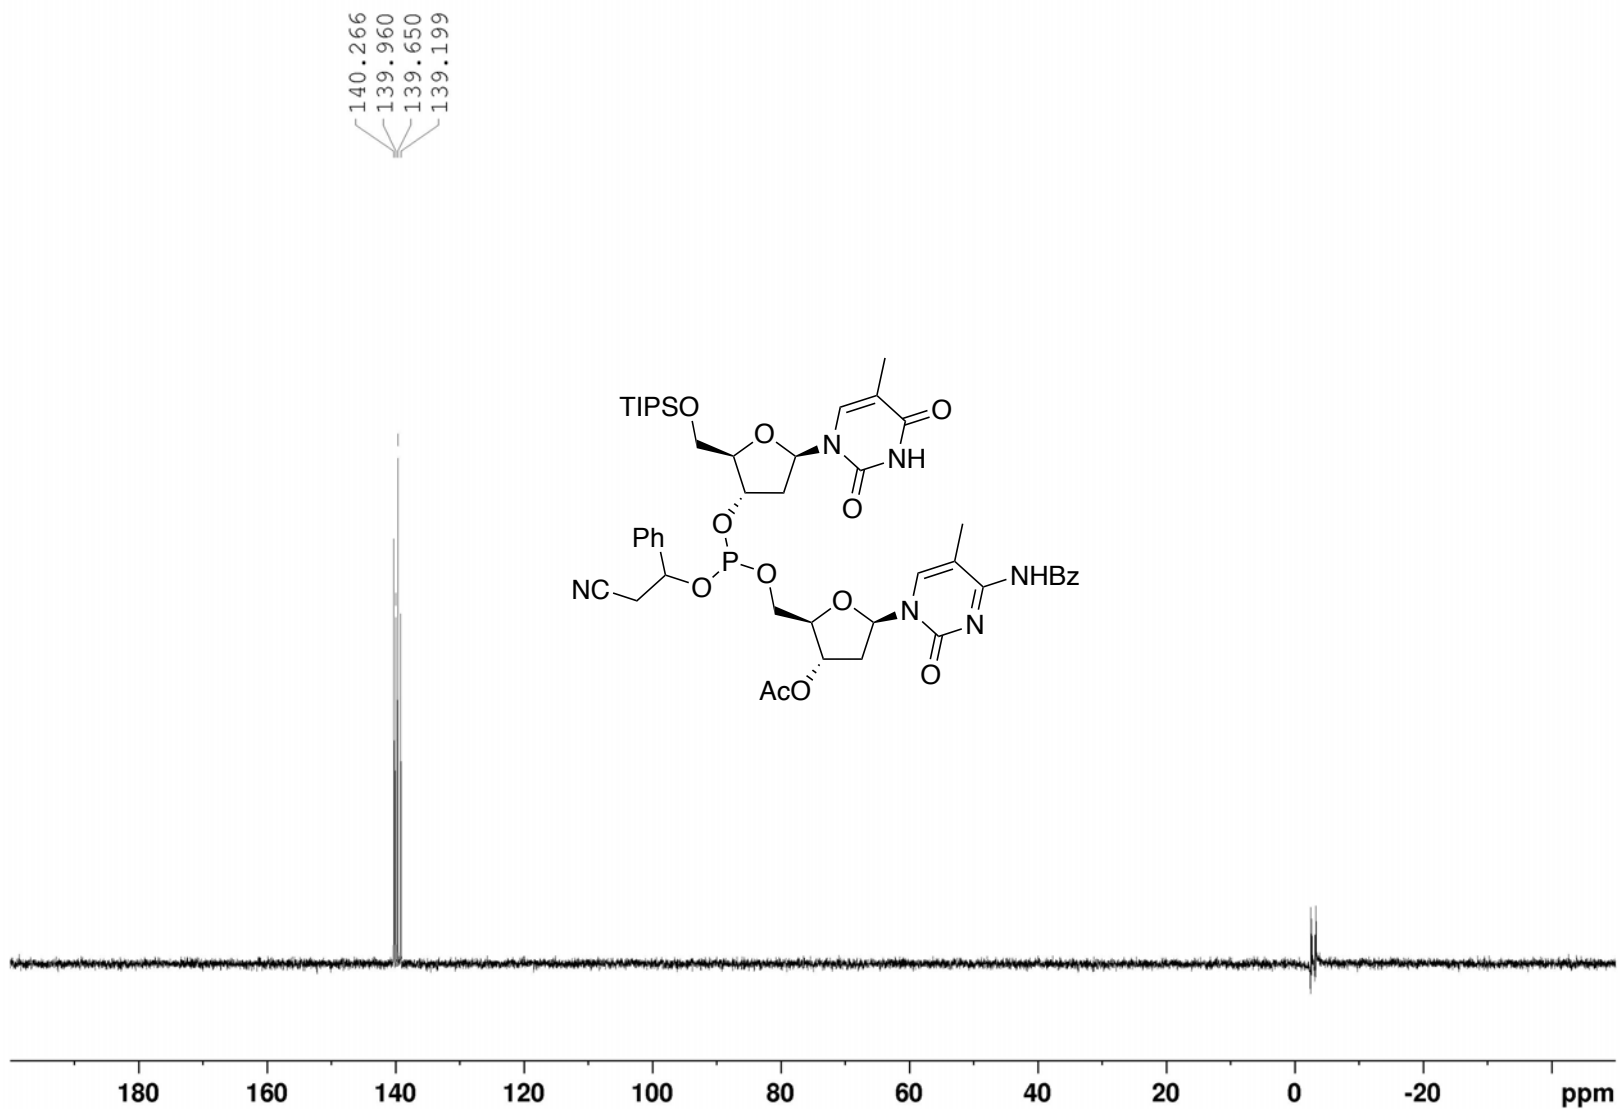

$^{31}\text{P}$  NMR (162 MHz,  $\text{CDCl}_3$ ) spectrum of **1d**

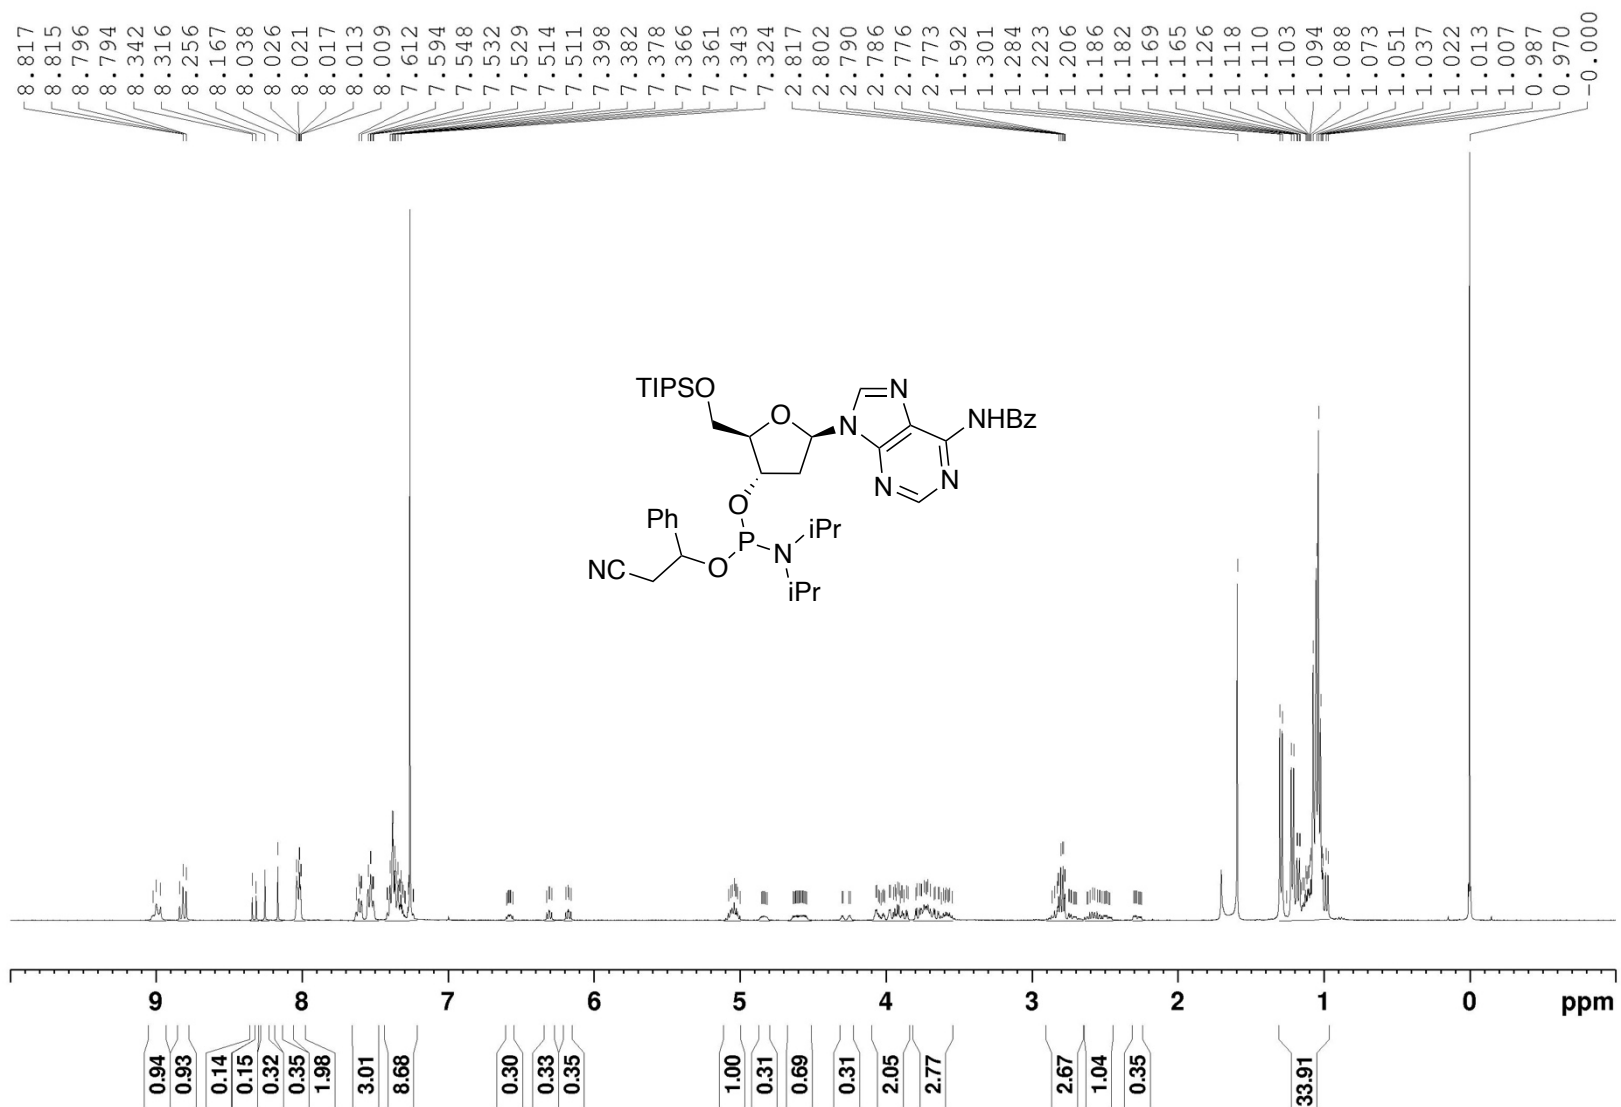

<sup>1</sup>H NMR (400 MHz, CDCl<sub>3</sub>) spectrum of *N*<sup>6</sup>-Benzoyl-5'-*O*-TIPS-2'-deoxyadenosine Phosphoramidite

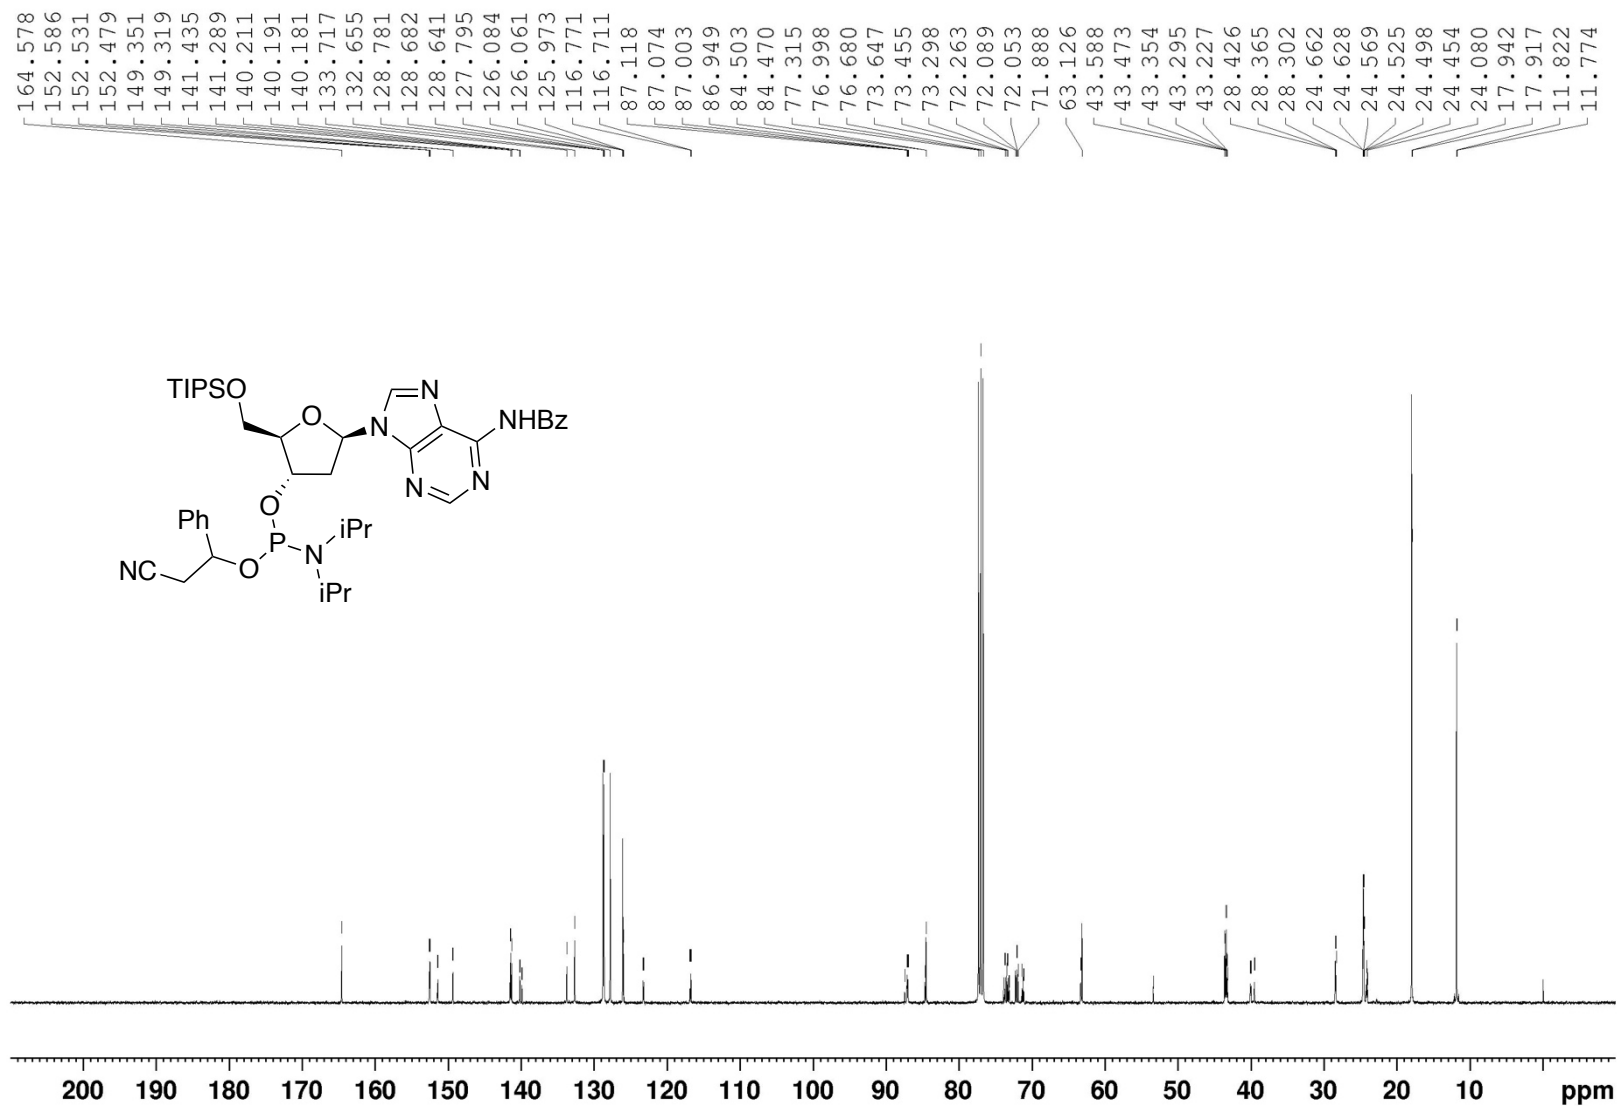

<sup>13</sup>C NMR (100.6 MHz, CDCl<sub>3</sub>) spectrum of *N*<sup>6</sup>-Benzoyl-5'-*O*-TIPS-2'-deoxyadenosine Phosphoramidite

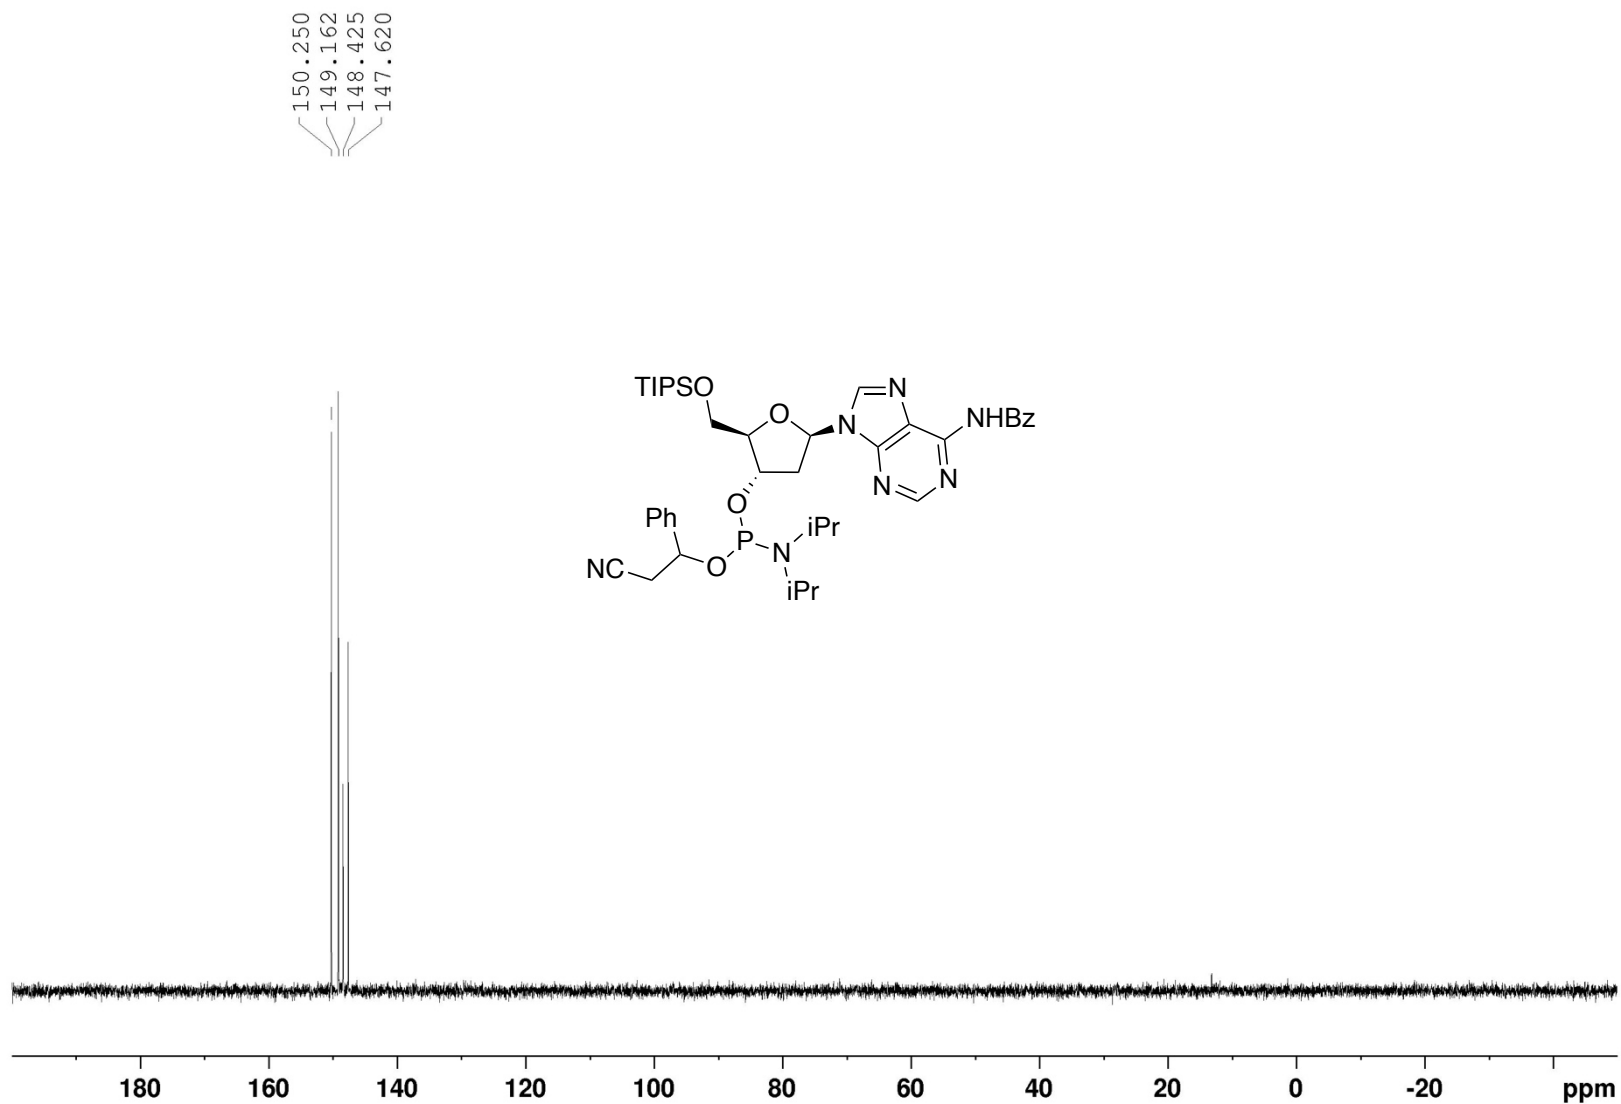

<sup>31</sup>P NMR (162 MHz, CDCl<sub>3</sub>) spectrum of *N*<sup>6</sup>-Benzoyl-5'-*O*-TIPS-2'-deoxyadenosine Phosphoramidite

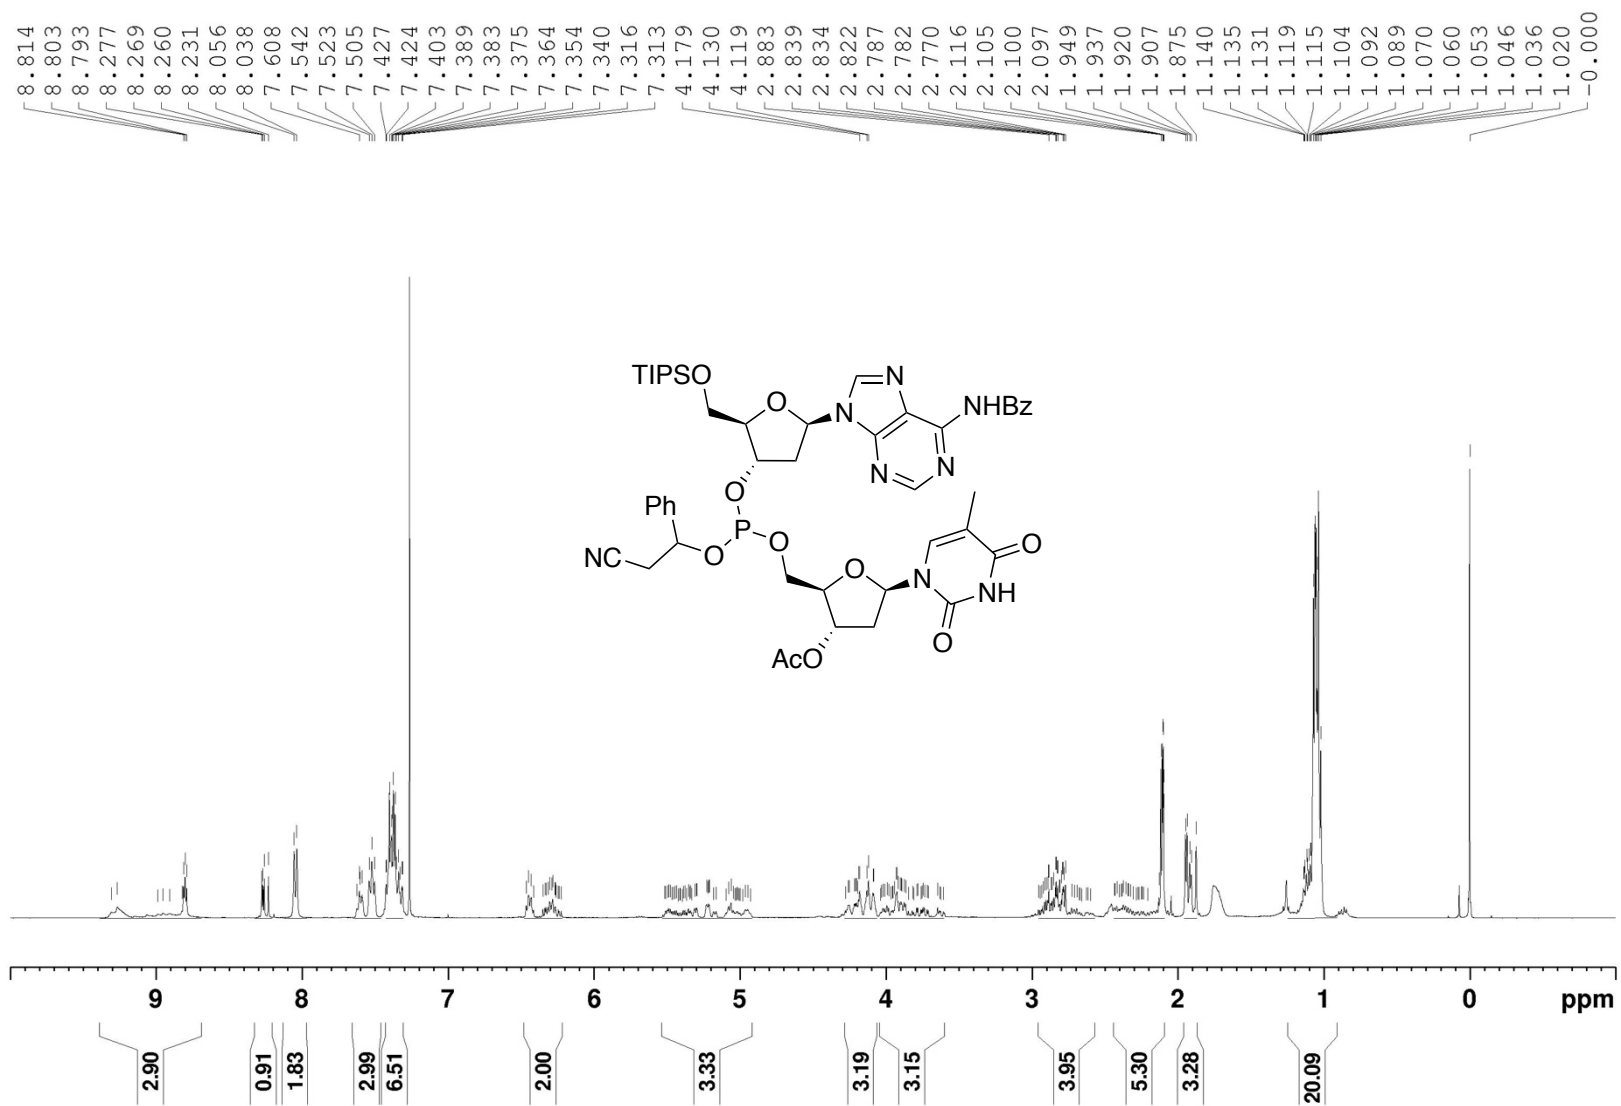

<sup>1</sup>H NMR (400 MHz, CDCl<sub>3</sub>) spectrum of **1e**



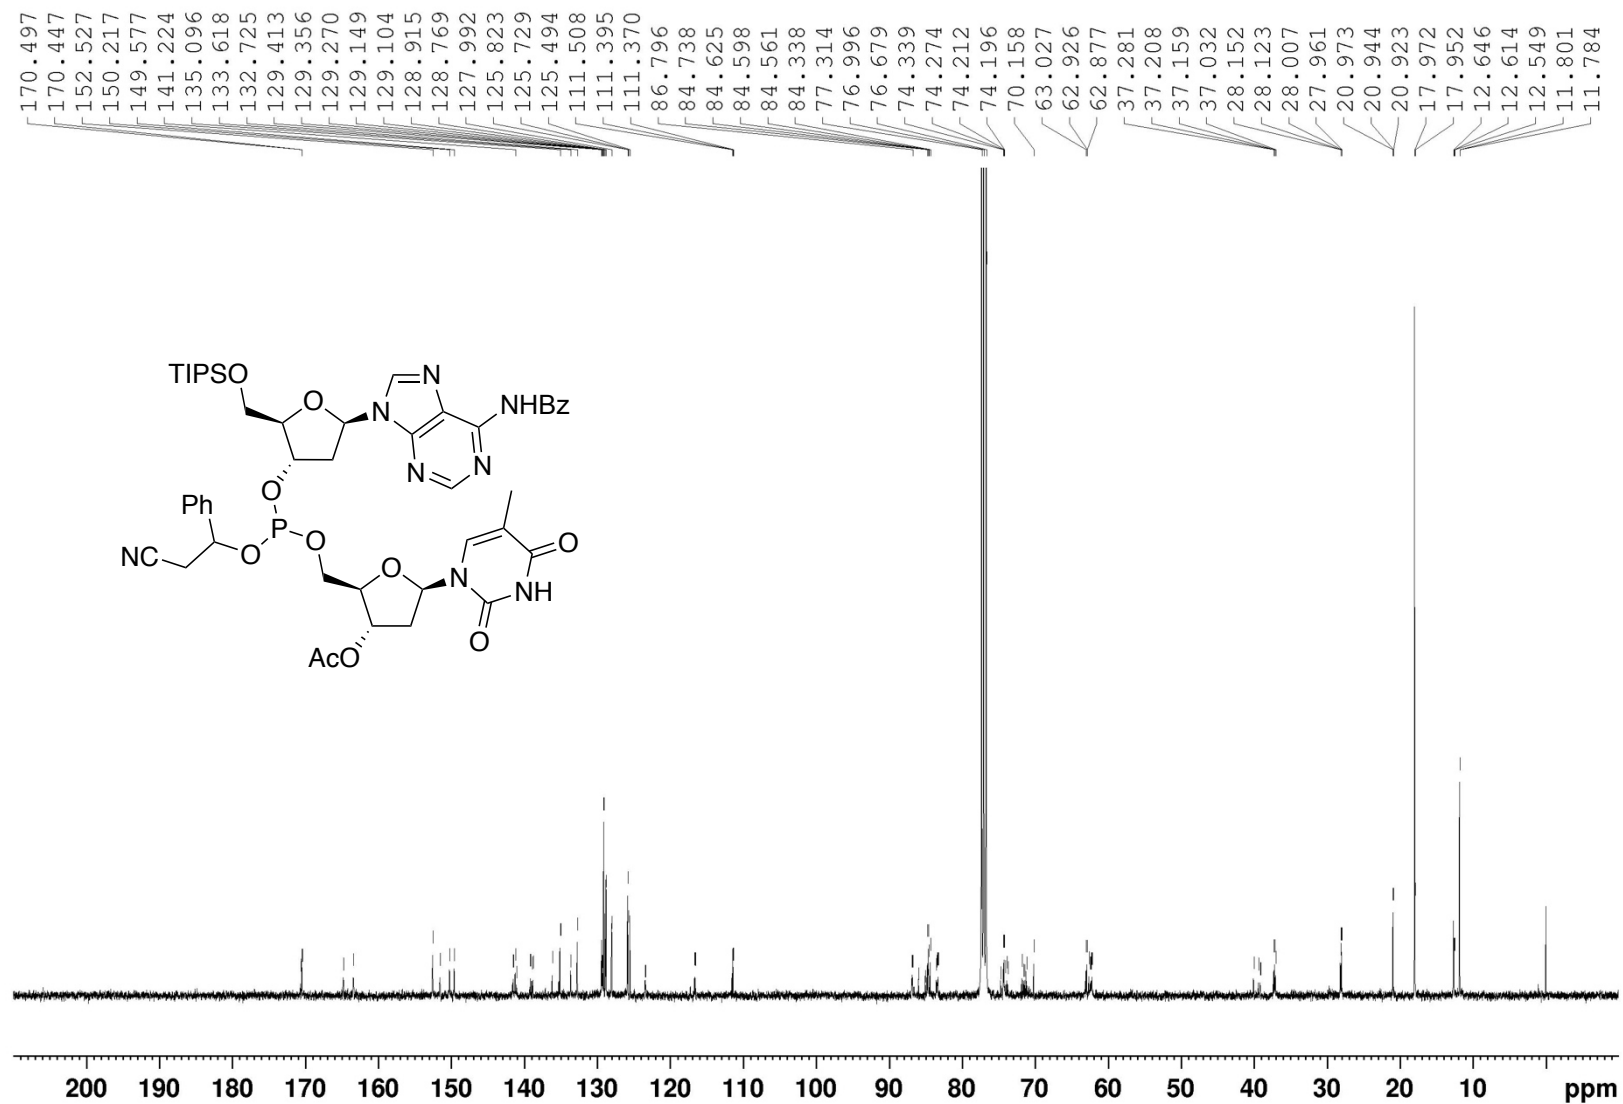

$^{13}\text{C}$  NMR (100.6 MHz,  $\text{CDCl}_3$ ) spectrum of **1e**

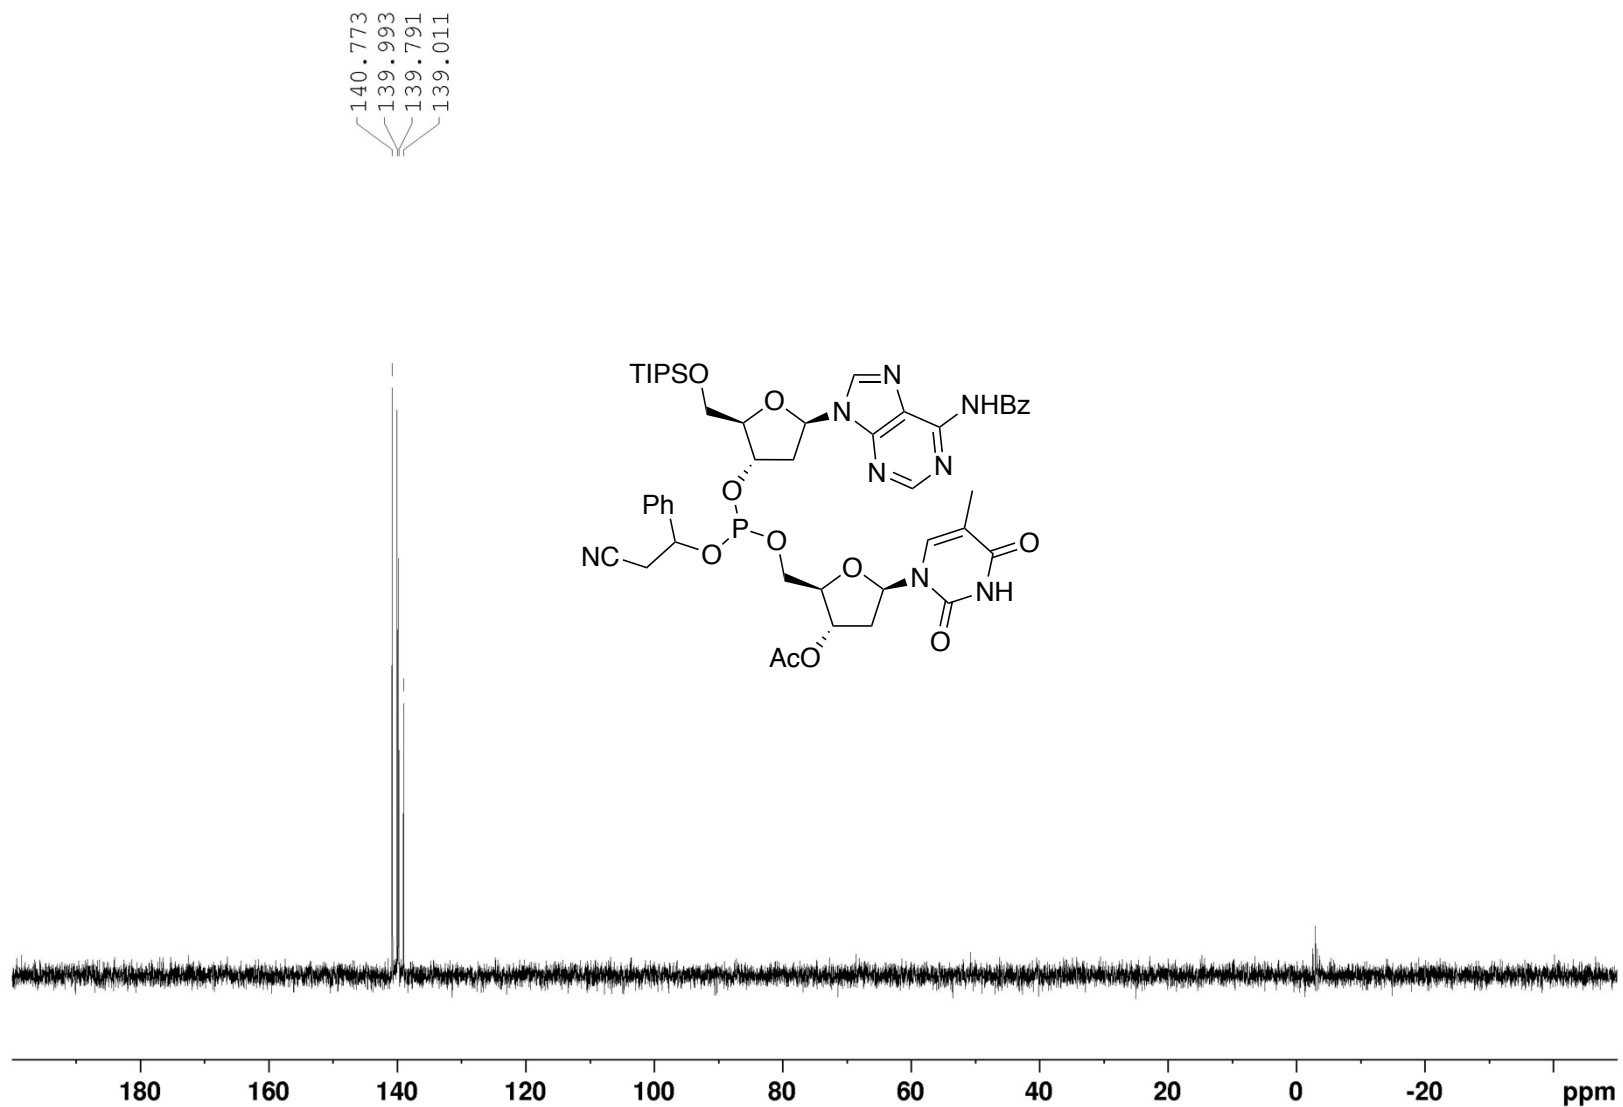

$^{31}\text{P}$  NMR (162 MHz,  $\text{CDCl}_3$ ) spectrum of **1e**

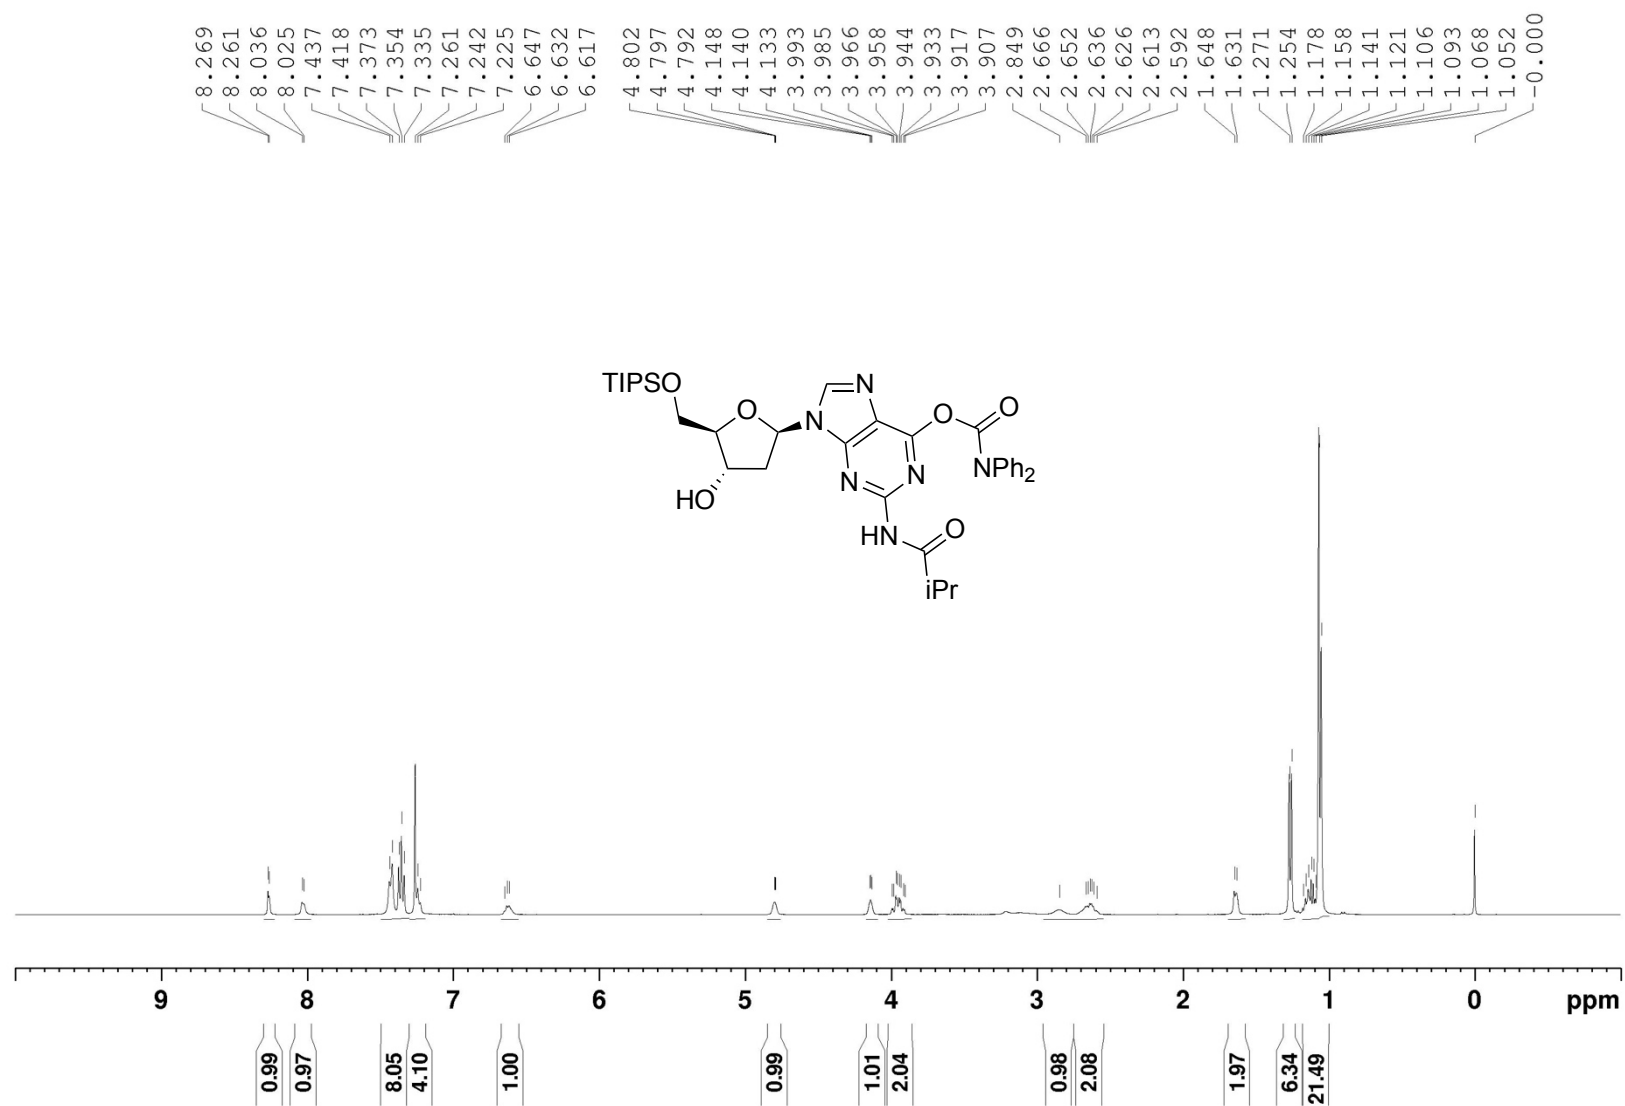

<sup>1</sup>H NMR (400 MHz, CDCl<sub>3</sub>) spectrum of *N*<sup>2</sup>-Isobutyryl-*O*<sup>6</sup>-(diphenylcarbamoyl)-5'-*O*-TIPS-2'-deoxyguanosine

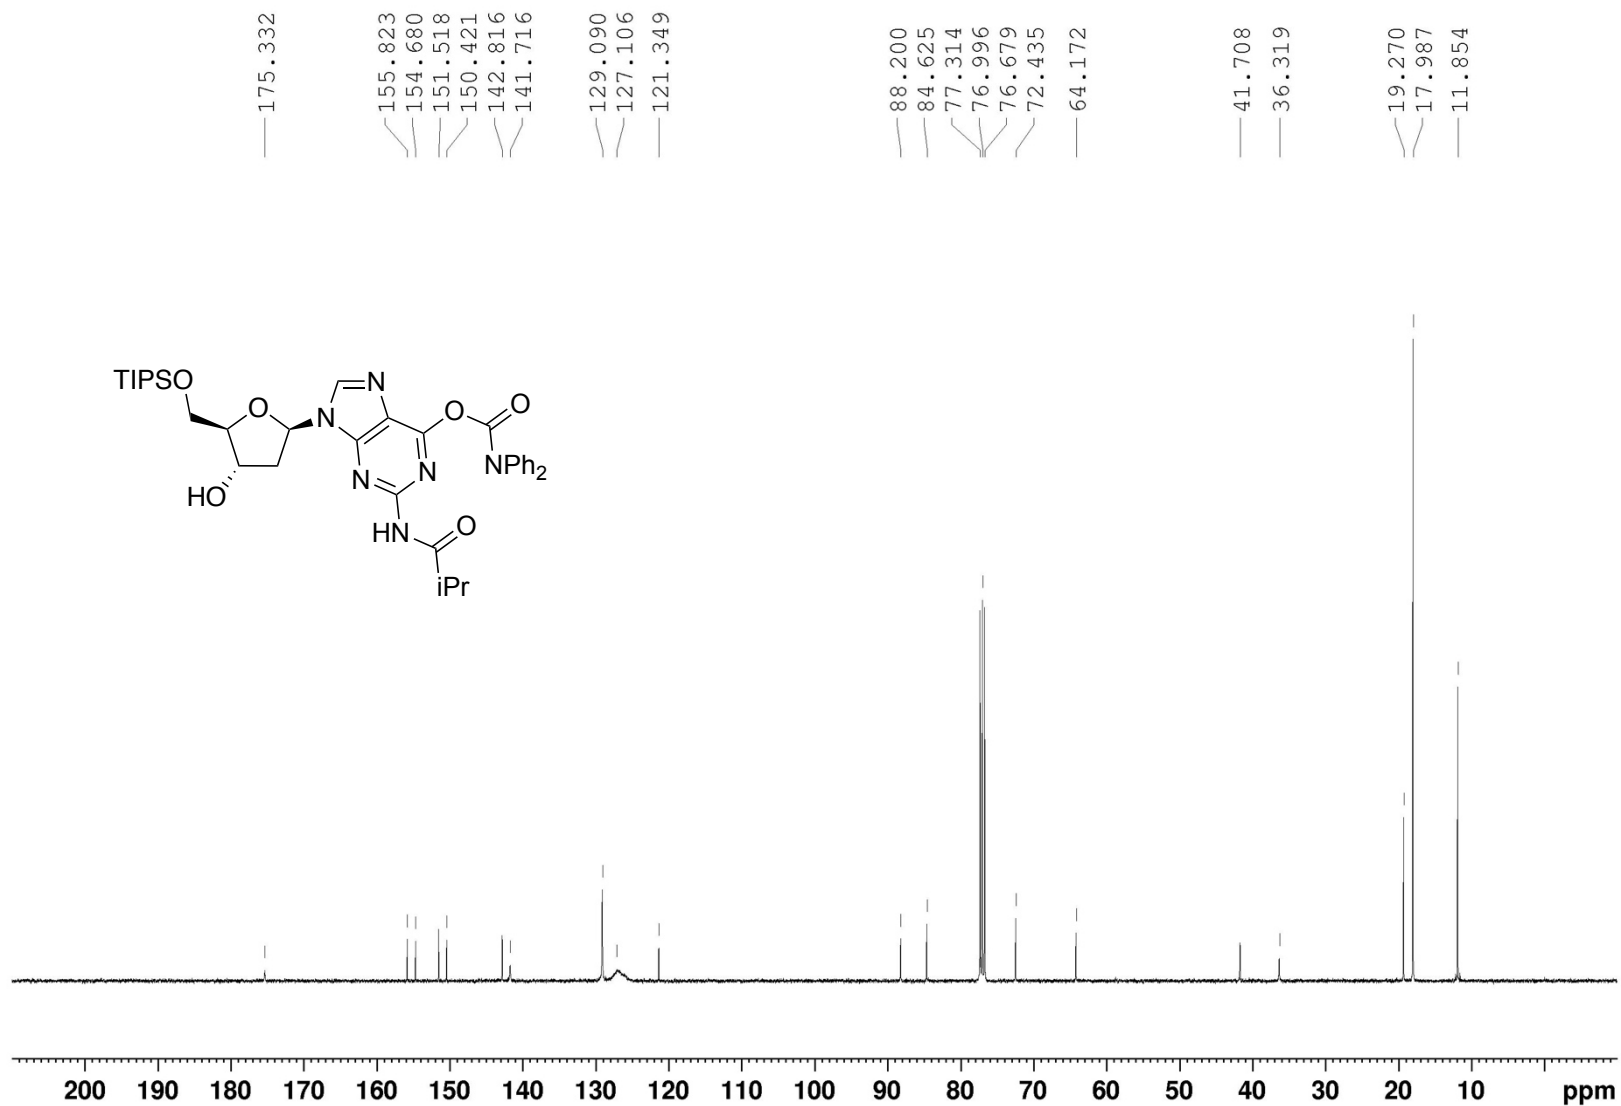

<sup>13</sup>C NMR (100.6 MHz, CDCl<sub>3</sub>) spectrum of *N*<sup>2</sup>-Isobutyryl-*O*<sup>6</sup>-(diphenylcarbamoyl)-5'-*O*-TIPS-2'-deoxyguanosine

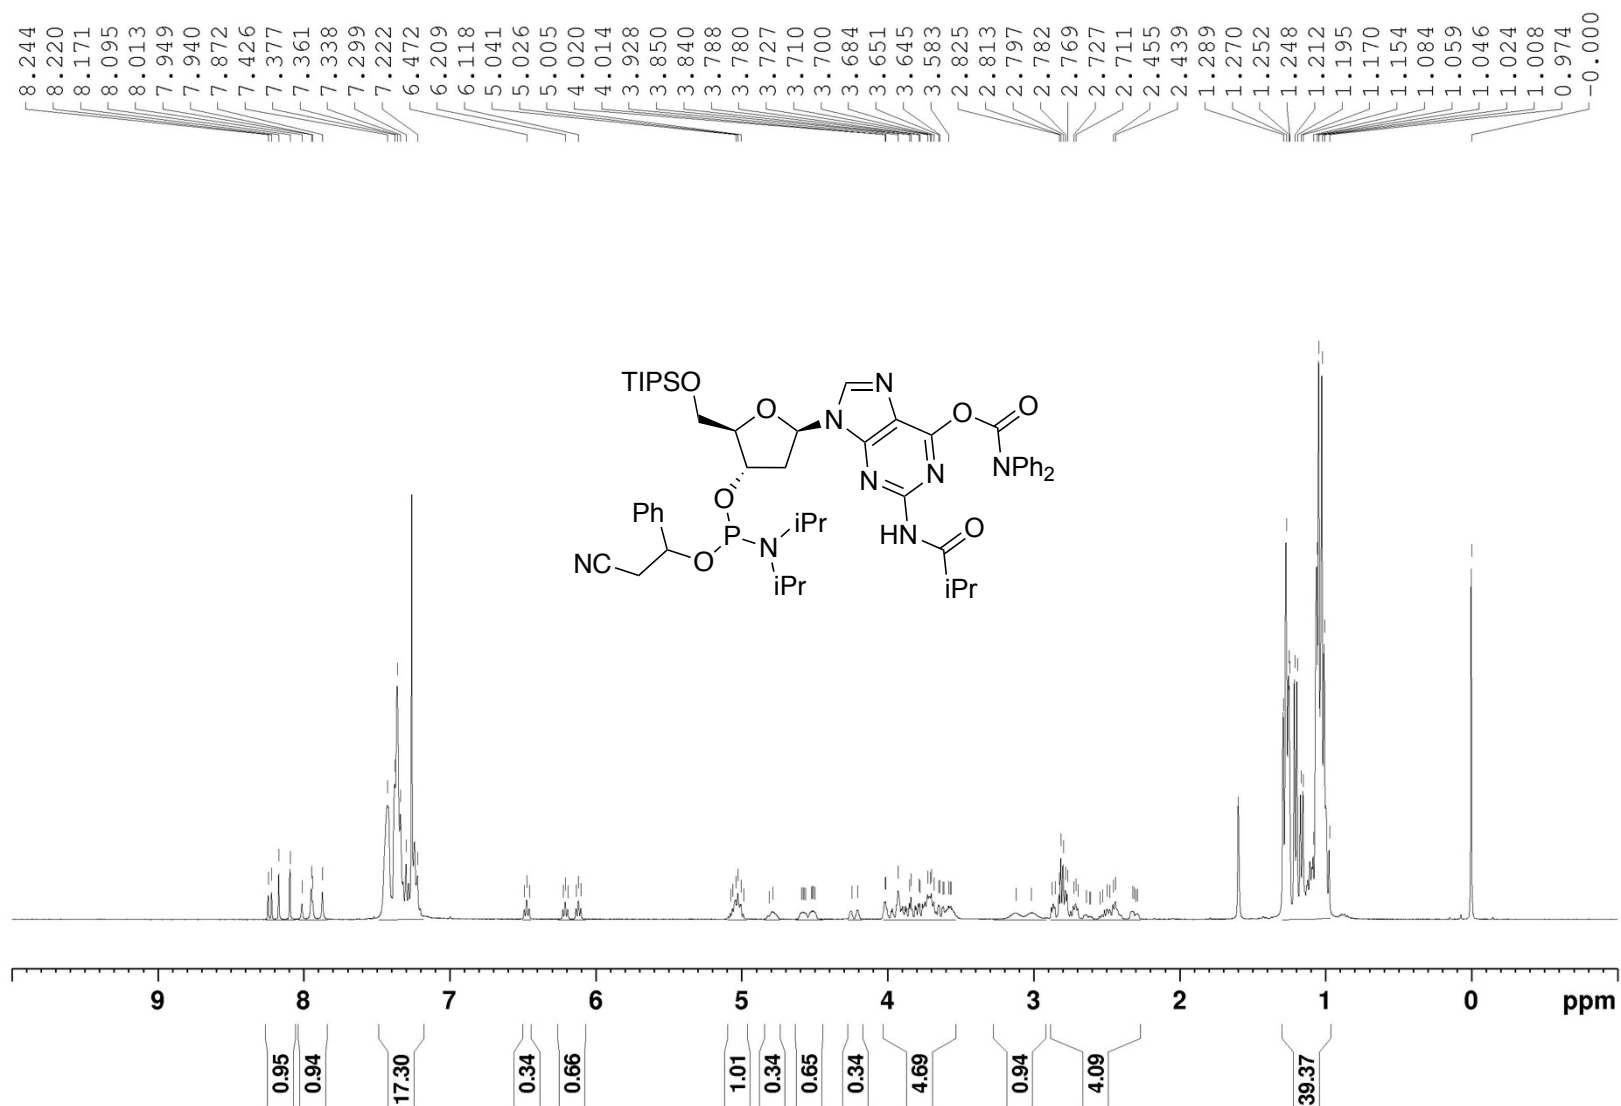

<sup>1</sup>H NMR (400 MHz, CDCl<sub>3</sub>) spectrum of *N*<sup>2</sup>-Isobutyryl-*O*<sup>6</sup>-(diphenylcarbamoyl)-5'-*O*-TIPS-2'-deoxyguanosine Phosphoramidite

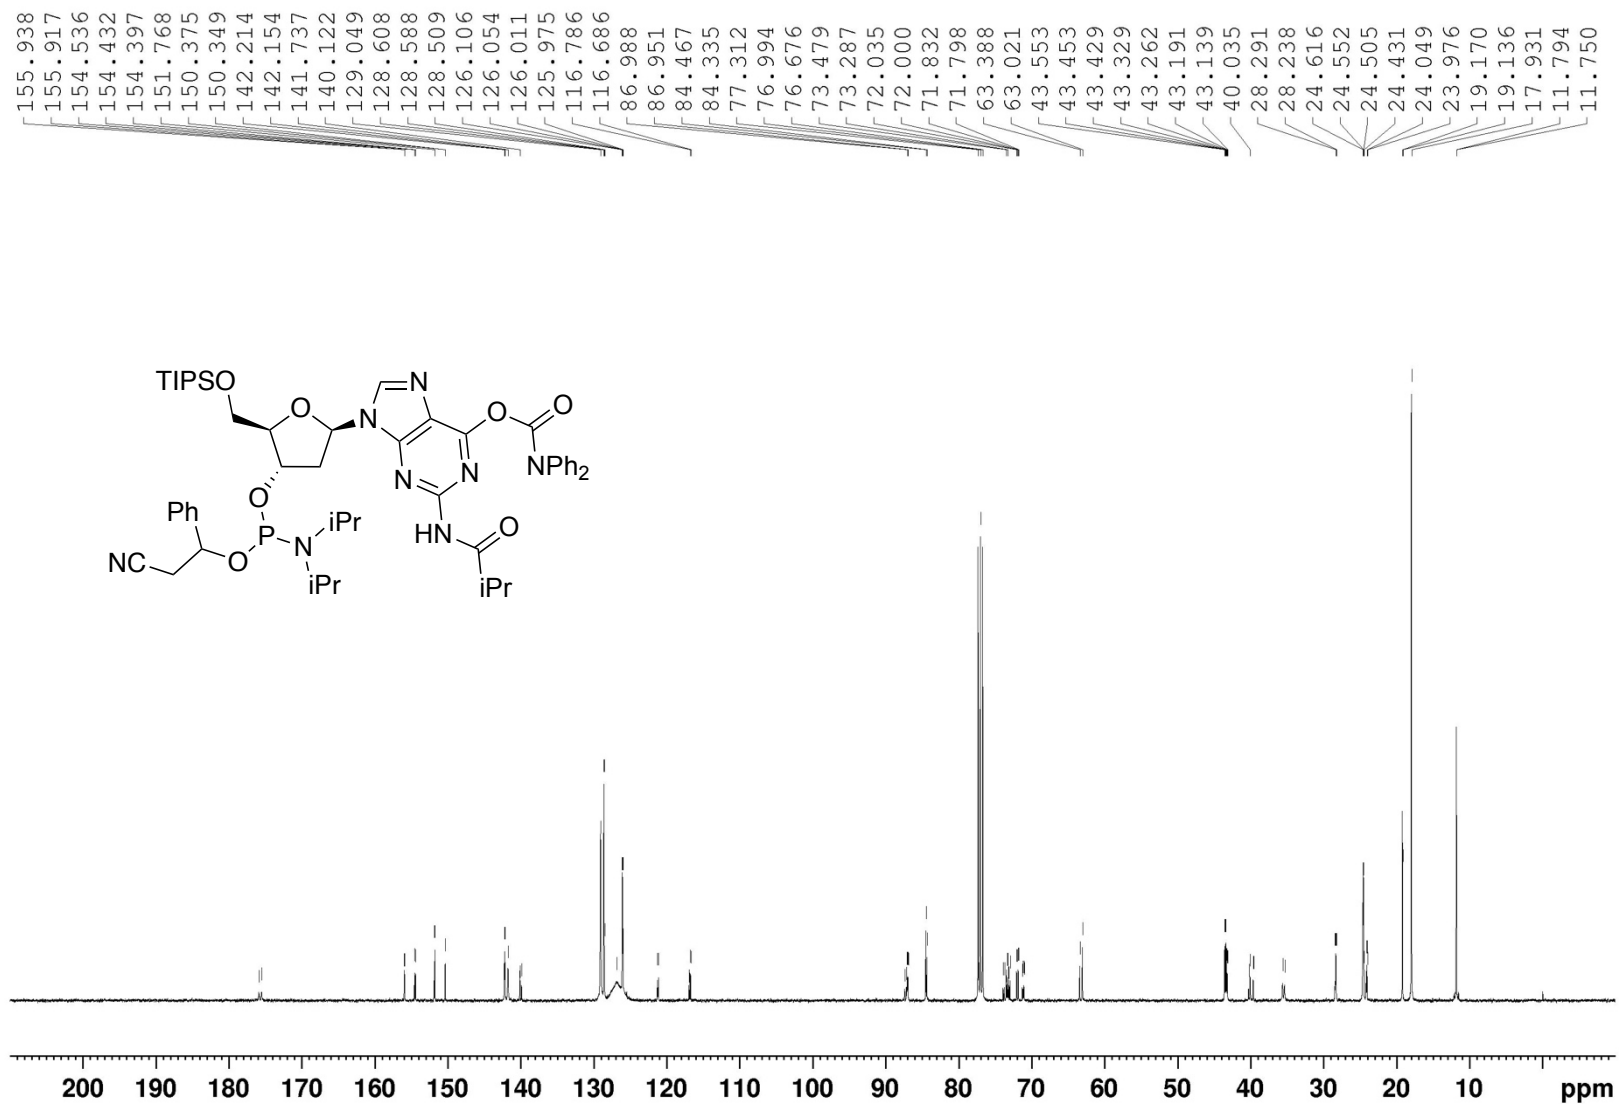

<sup>13</sup>C NMR (100.6 MHz, CDCl<sub>3</sub>) spectrum of *N*<sup>2</sup>-Isobutyryl-*O*<sup>6</sup>-(diphenylcarbamoyl)-5'-*O*-TIPS-2'-deoxyguanosine Phosphoramidite

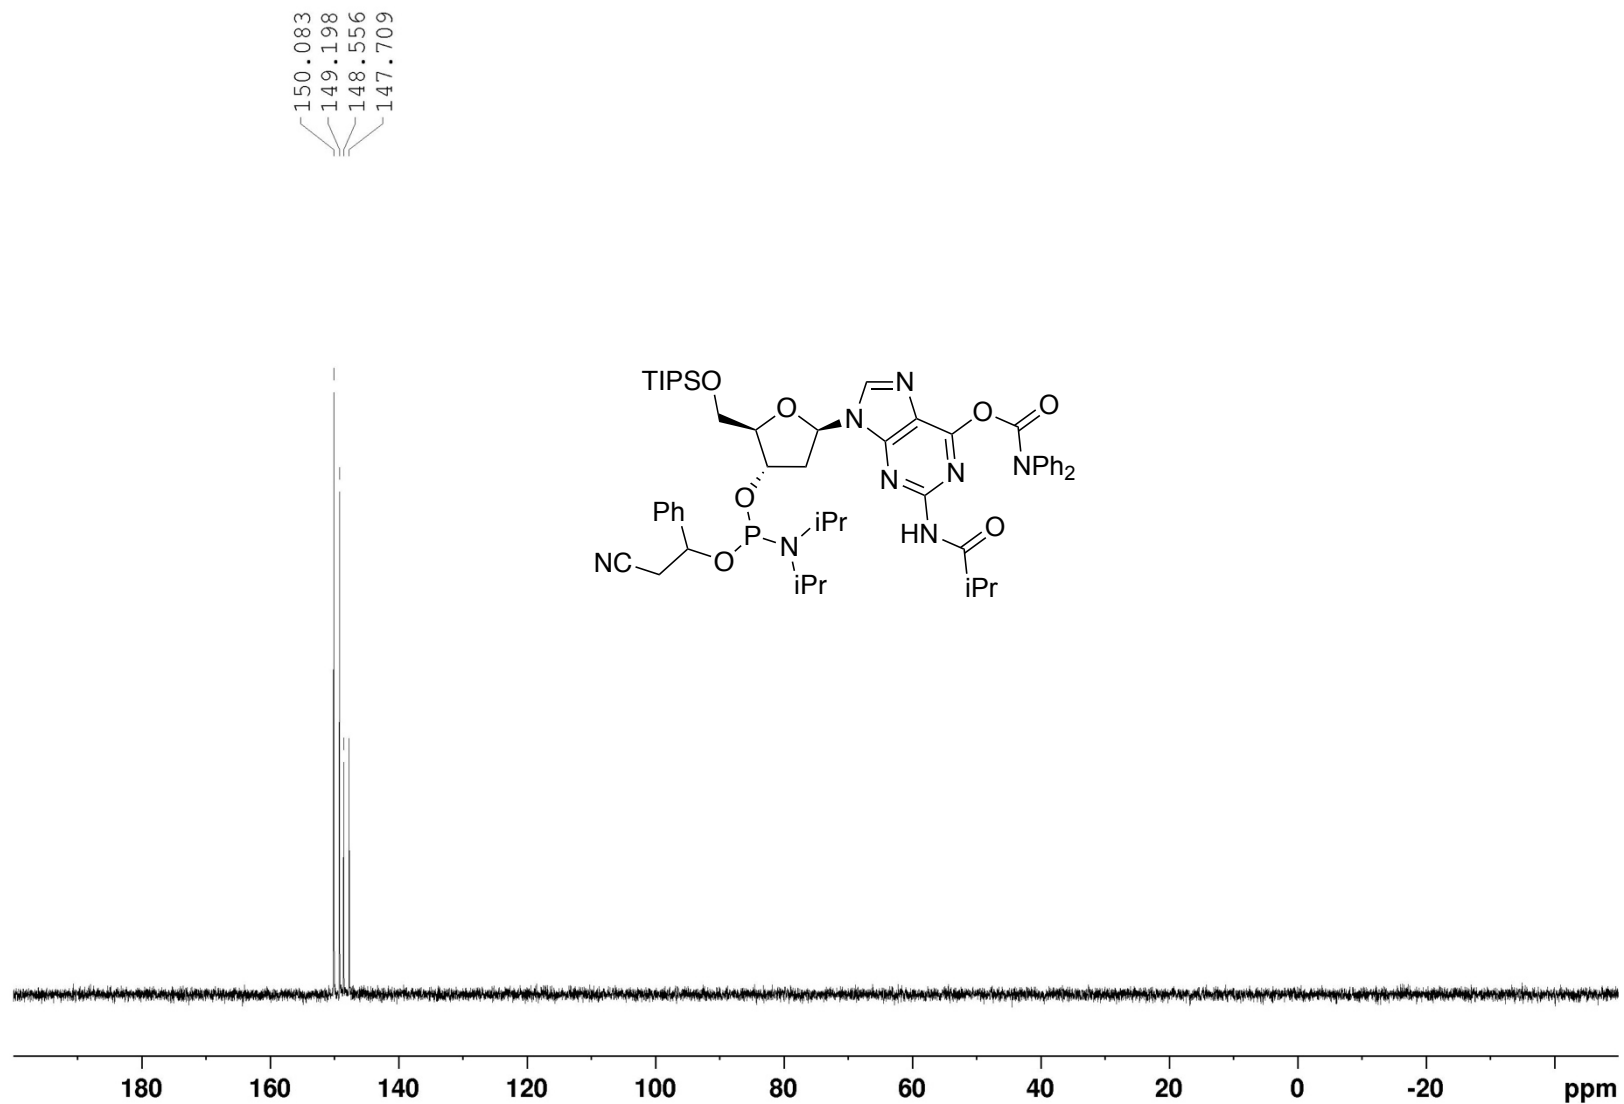

$^{31}\text{P}$  NMR (162 MHz,  $\text{CDCl}_3$ ) spectrum of *N*<sup>2</sup>-Isobutyryl-*O*<sup>6</sup>-(diphenylcarbamoyl)-5'-*O*-TIPS-2'-deoxyguanosine Phosphoramidite

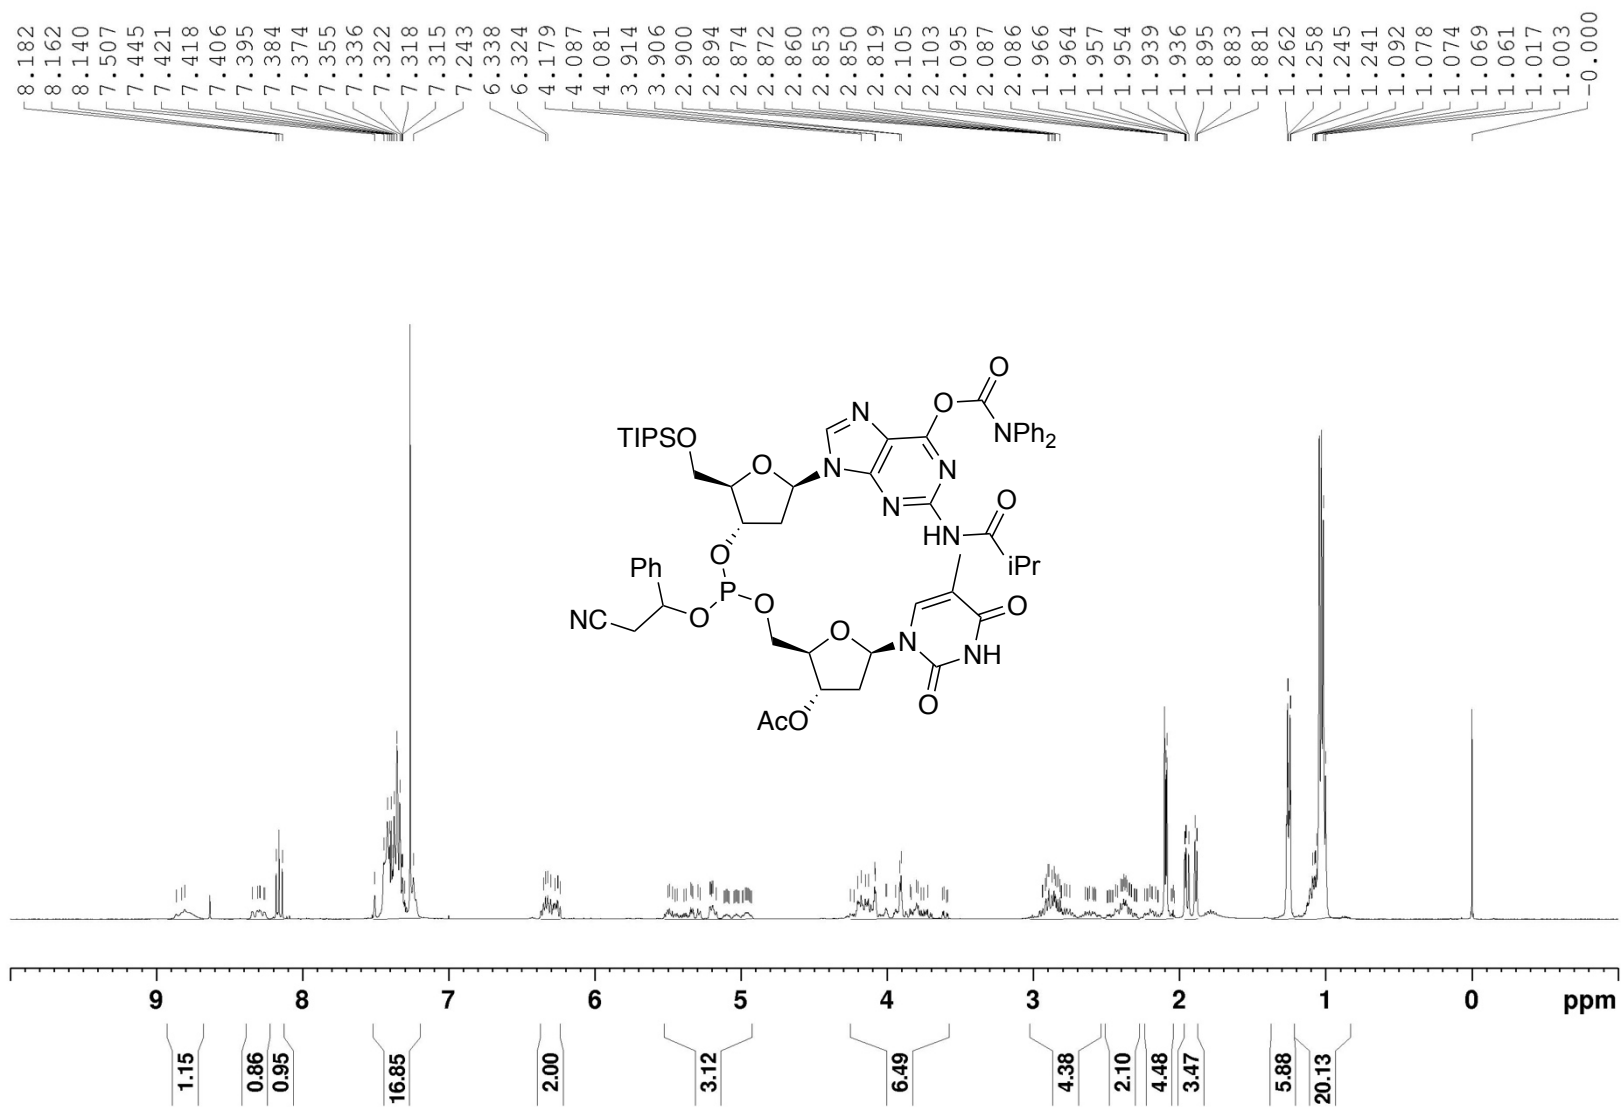

<sup>1</sup>H NMR (400 MHz, CDCl<sub>3</sub>) spectrum of **1f**



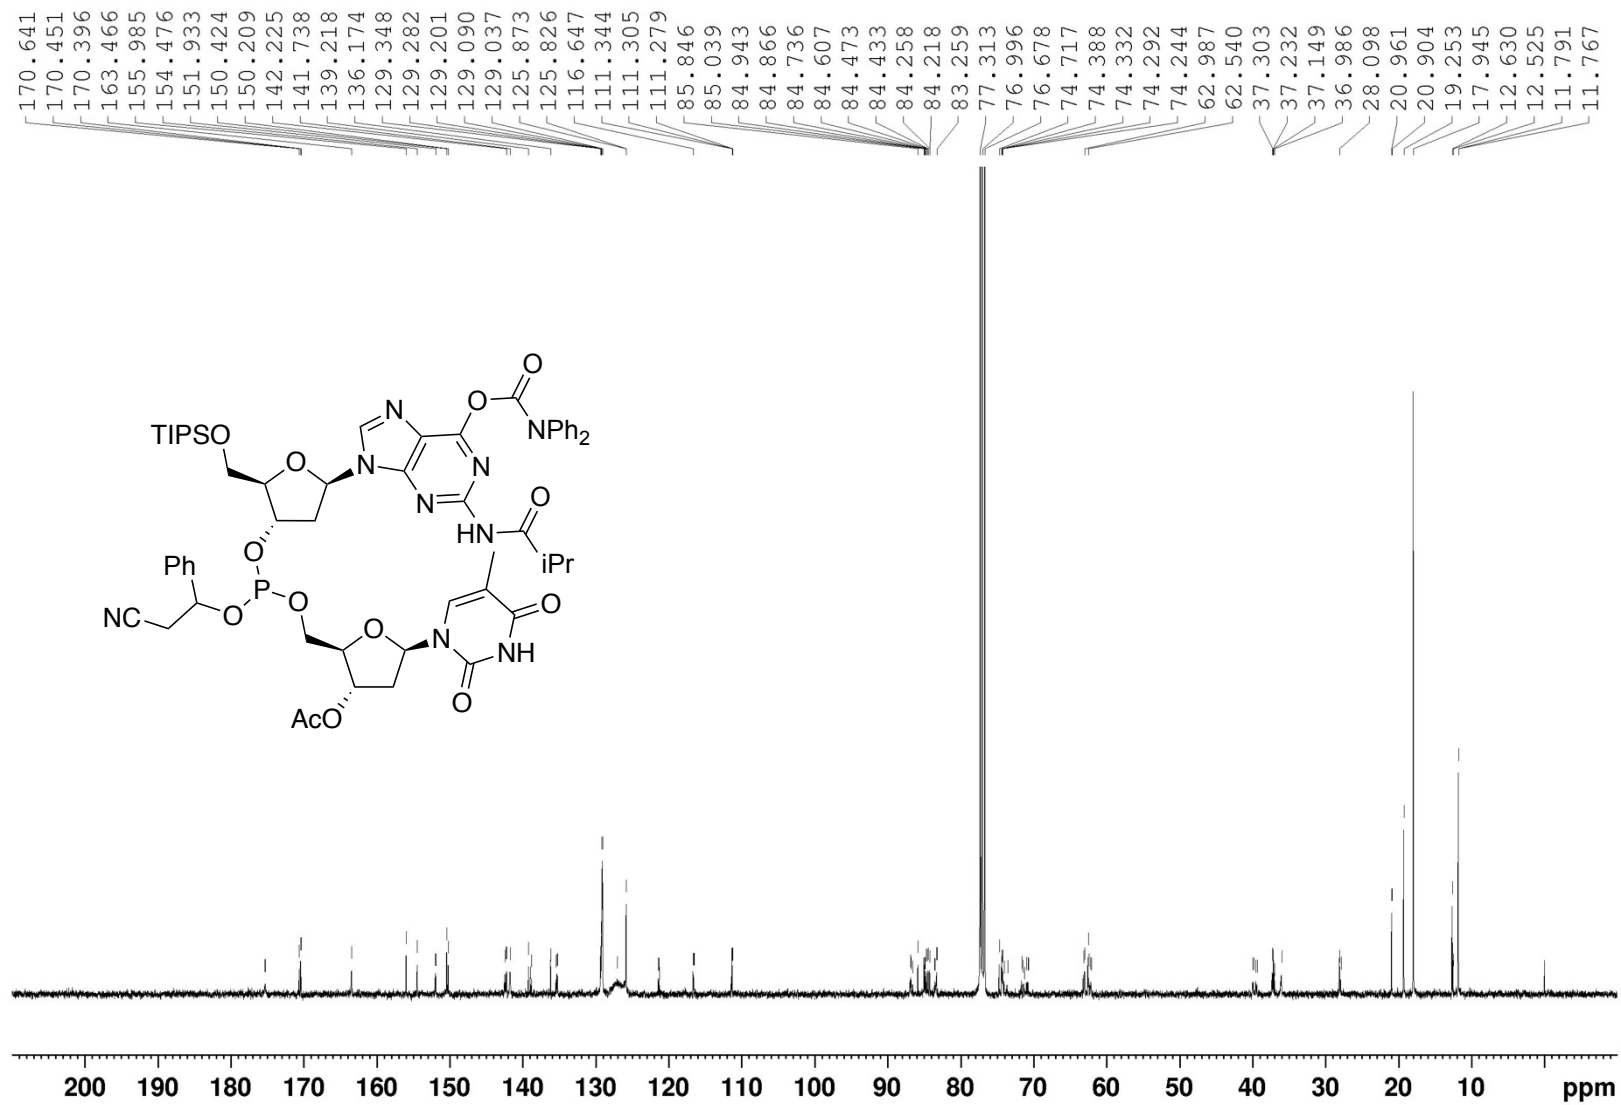

$^{13}\text{C}$  NMR (100.6 MHz,  $\text{CDCl}_3$ ) spectrum of **1f**

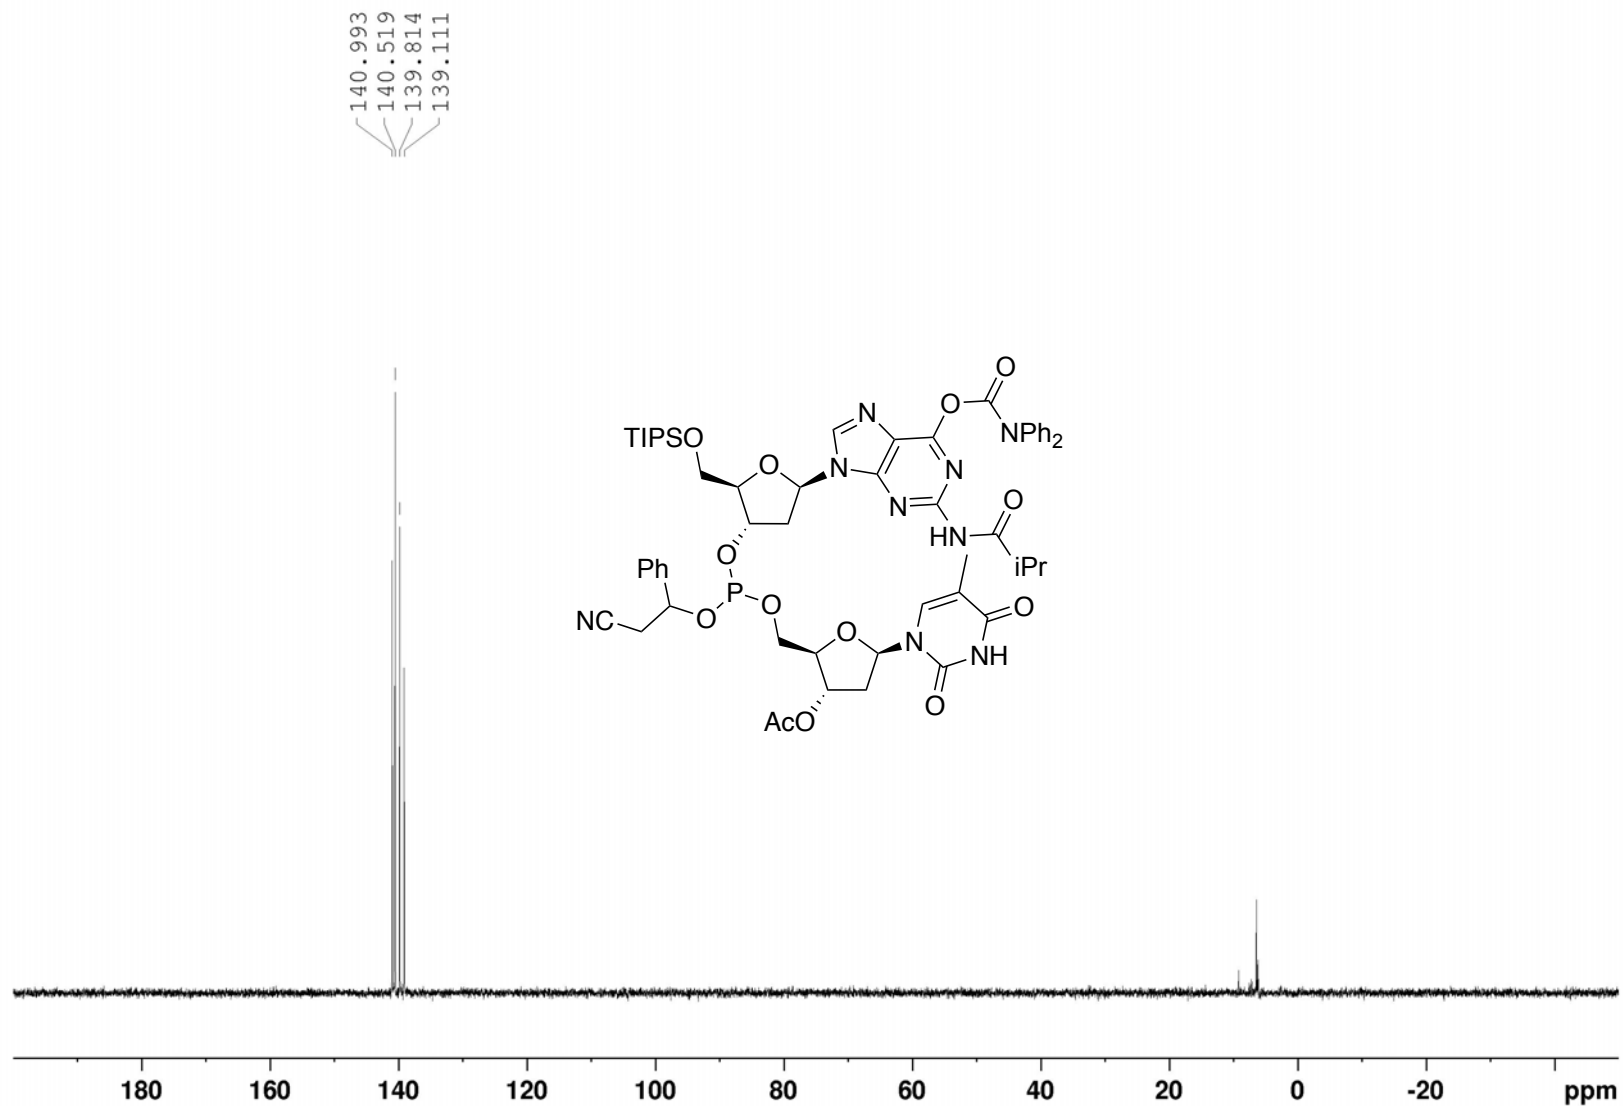

$^{31}\text{P}$  NMR (162 MHz,  $\text{CDCl}_3$ ) spectrum of **1f**

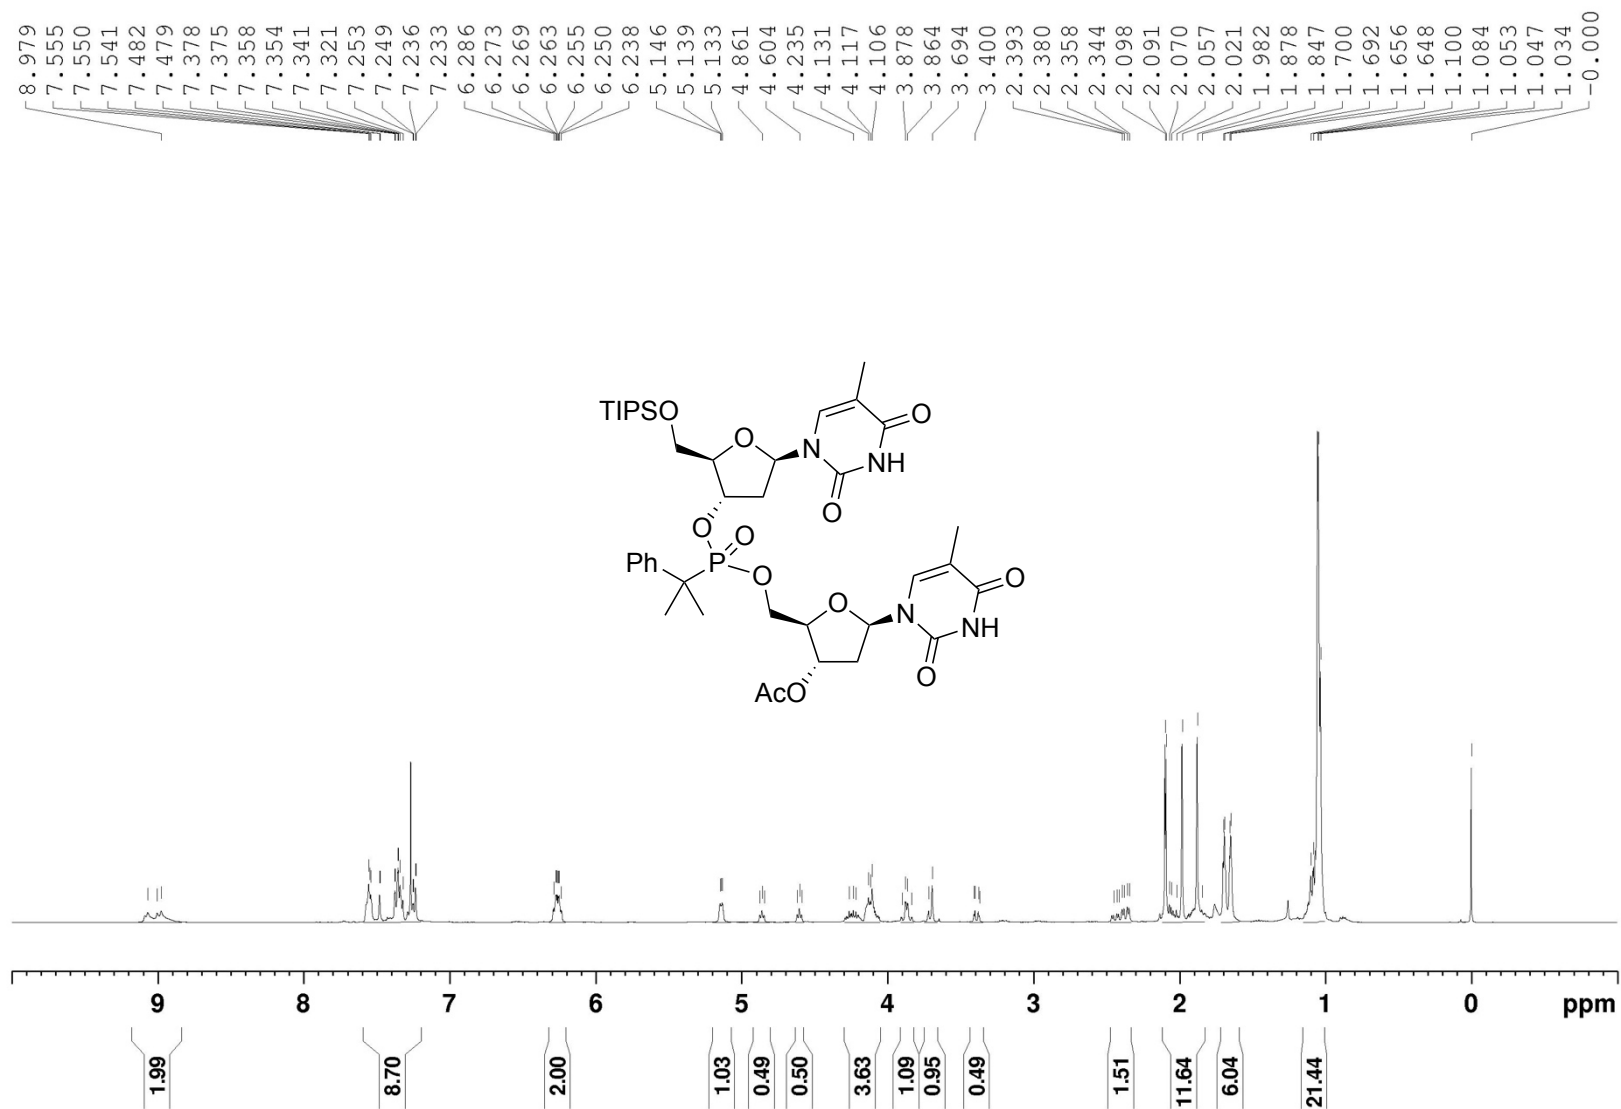

<sup>1</sup>H NMR (400 MHz, CDCl<sub>3</sub>) spectrum of **3aa**

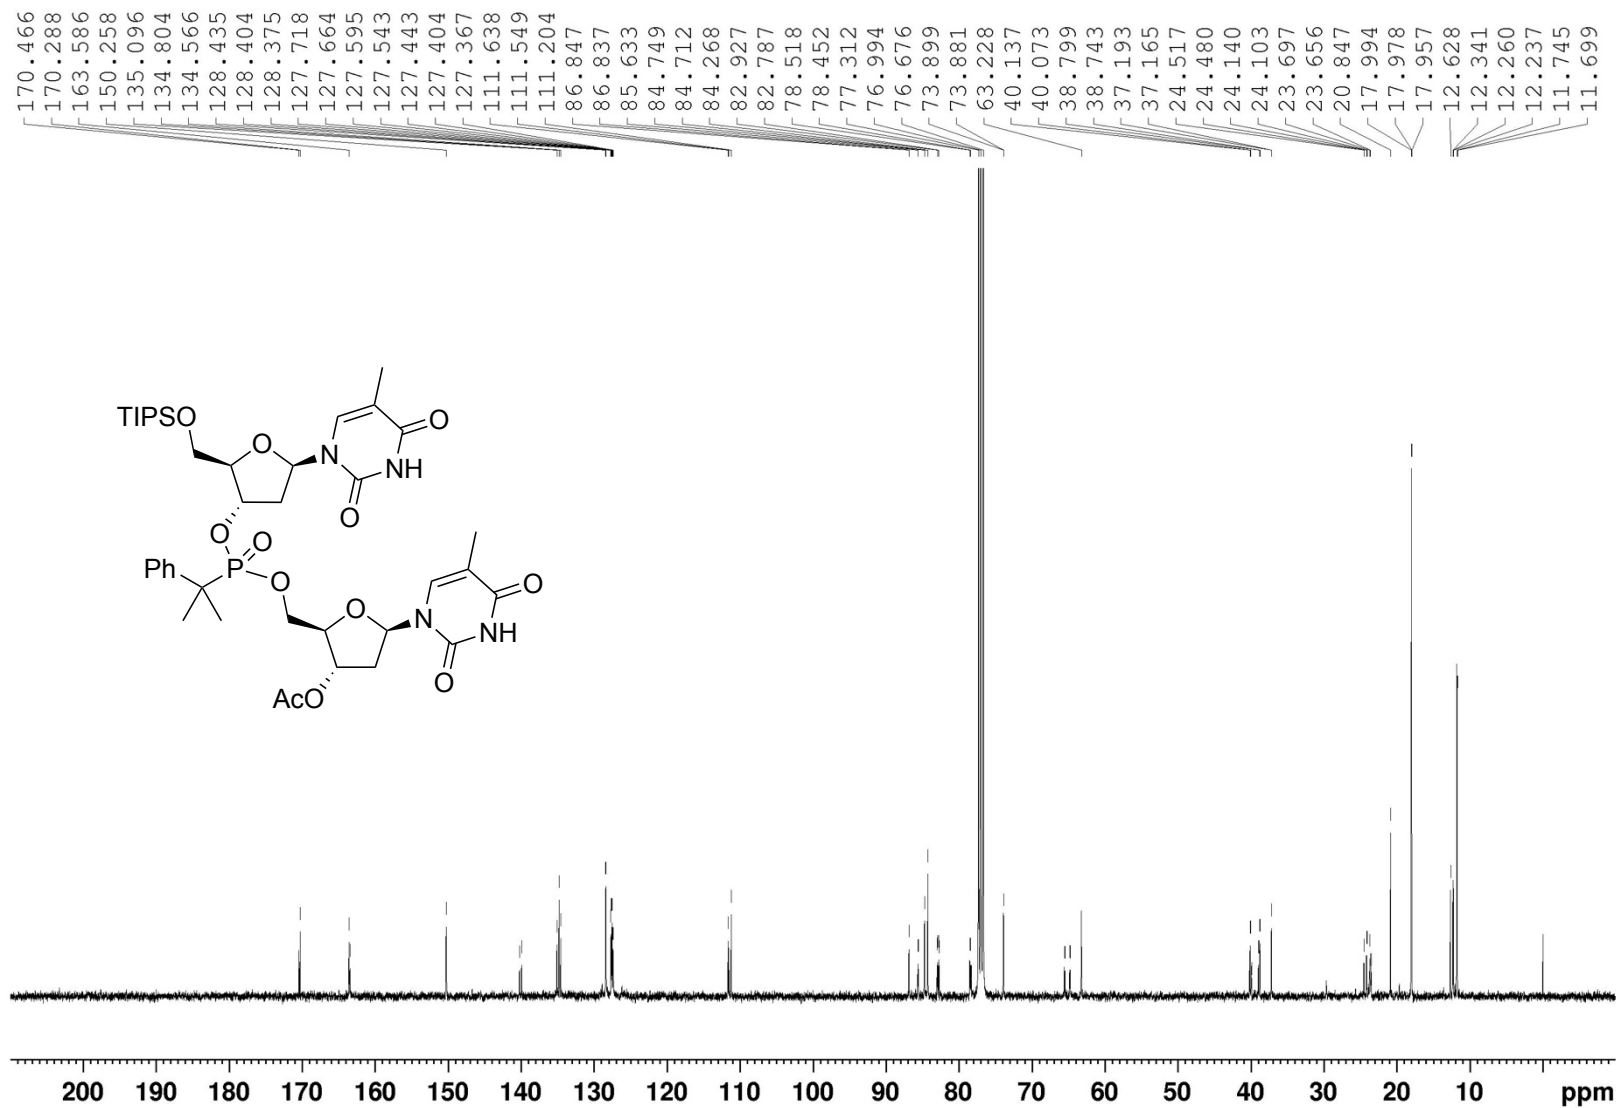

$^{13}\text{C}$  NMR (100.6 MHz,  $\text{CDCl}_3$ ) spectrum of **3aa**

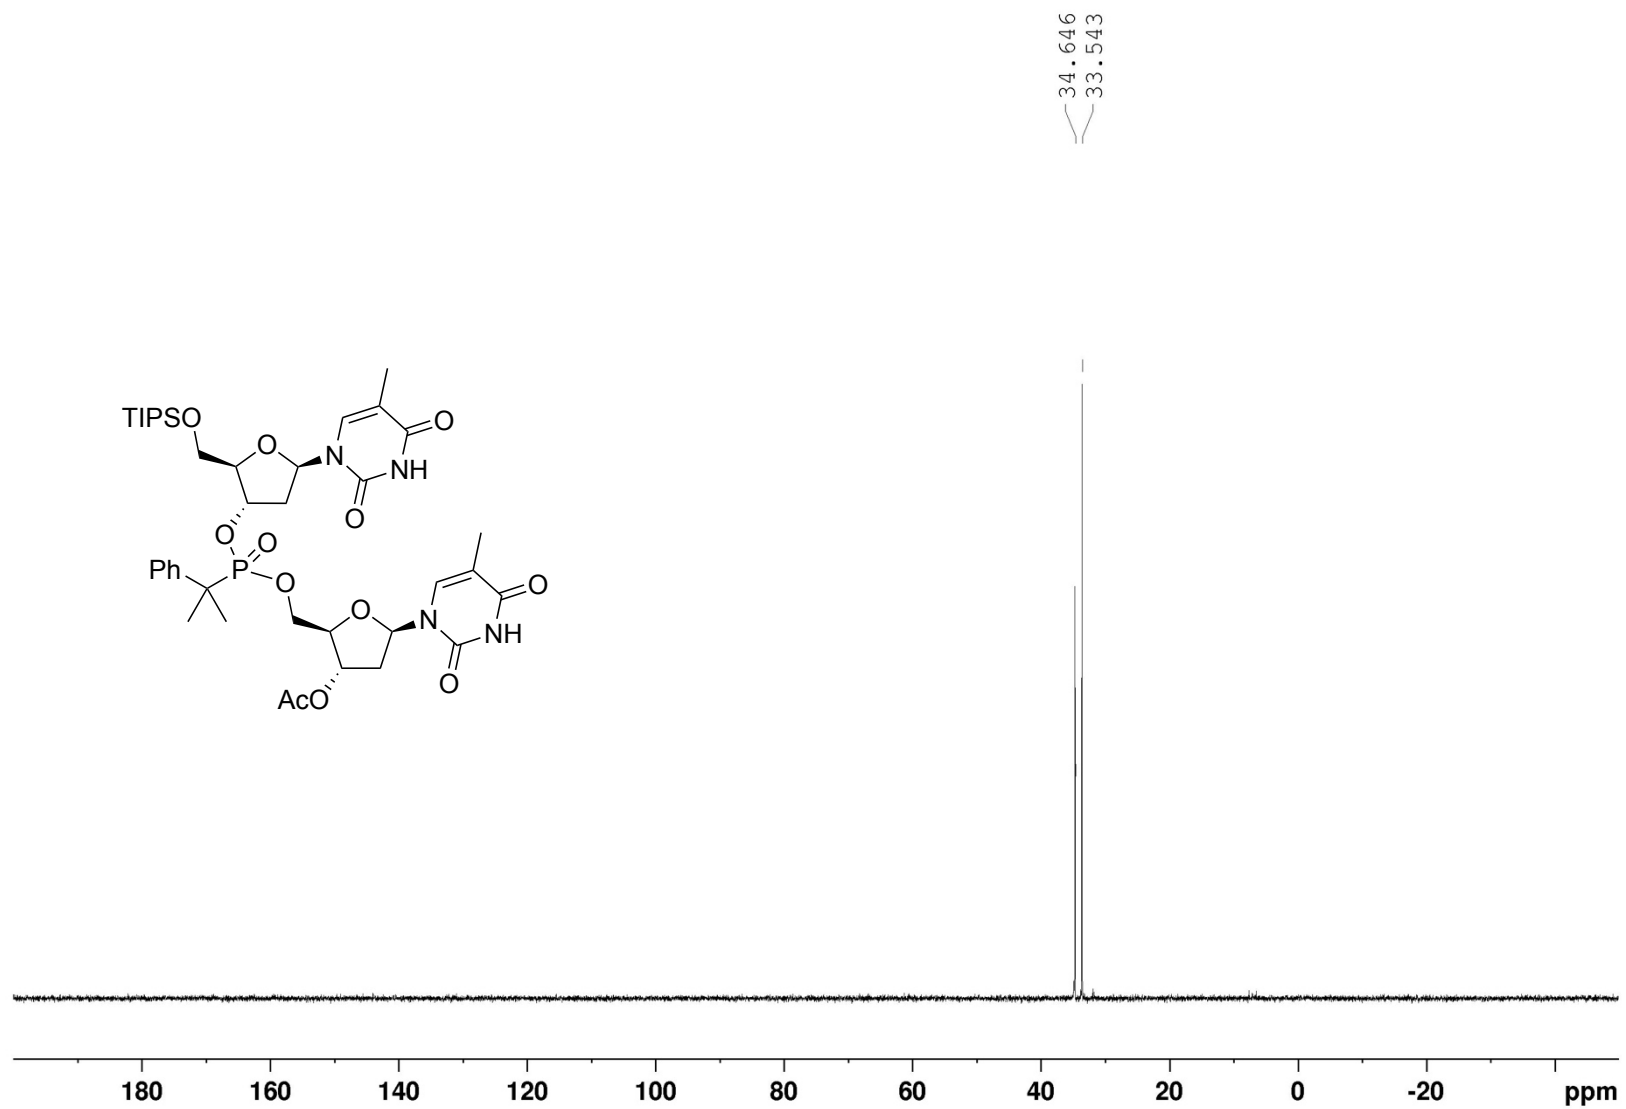

$^{31}\text{P}$  NMR (162 MHz,  $\text{CDCl}_3$ ) spectrum of **3aa**

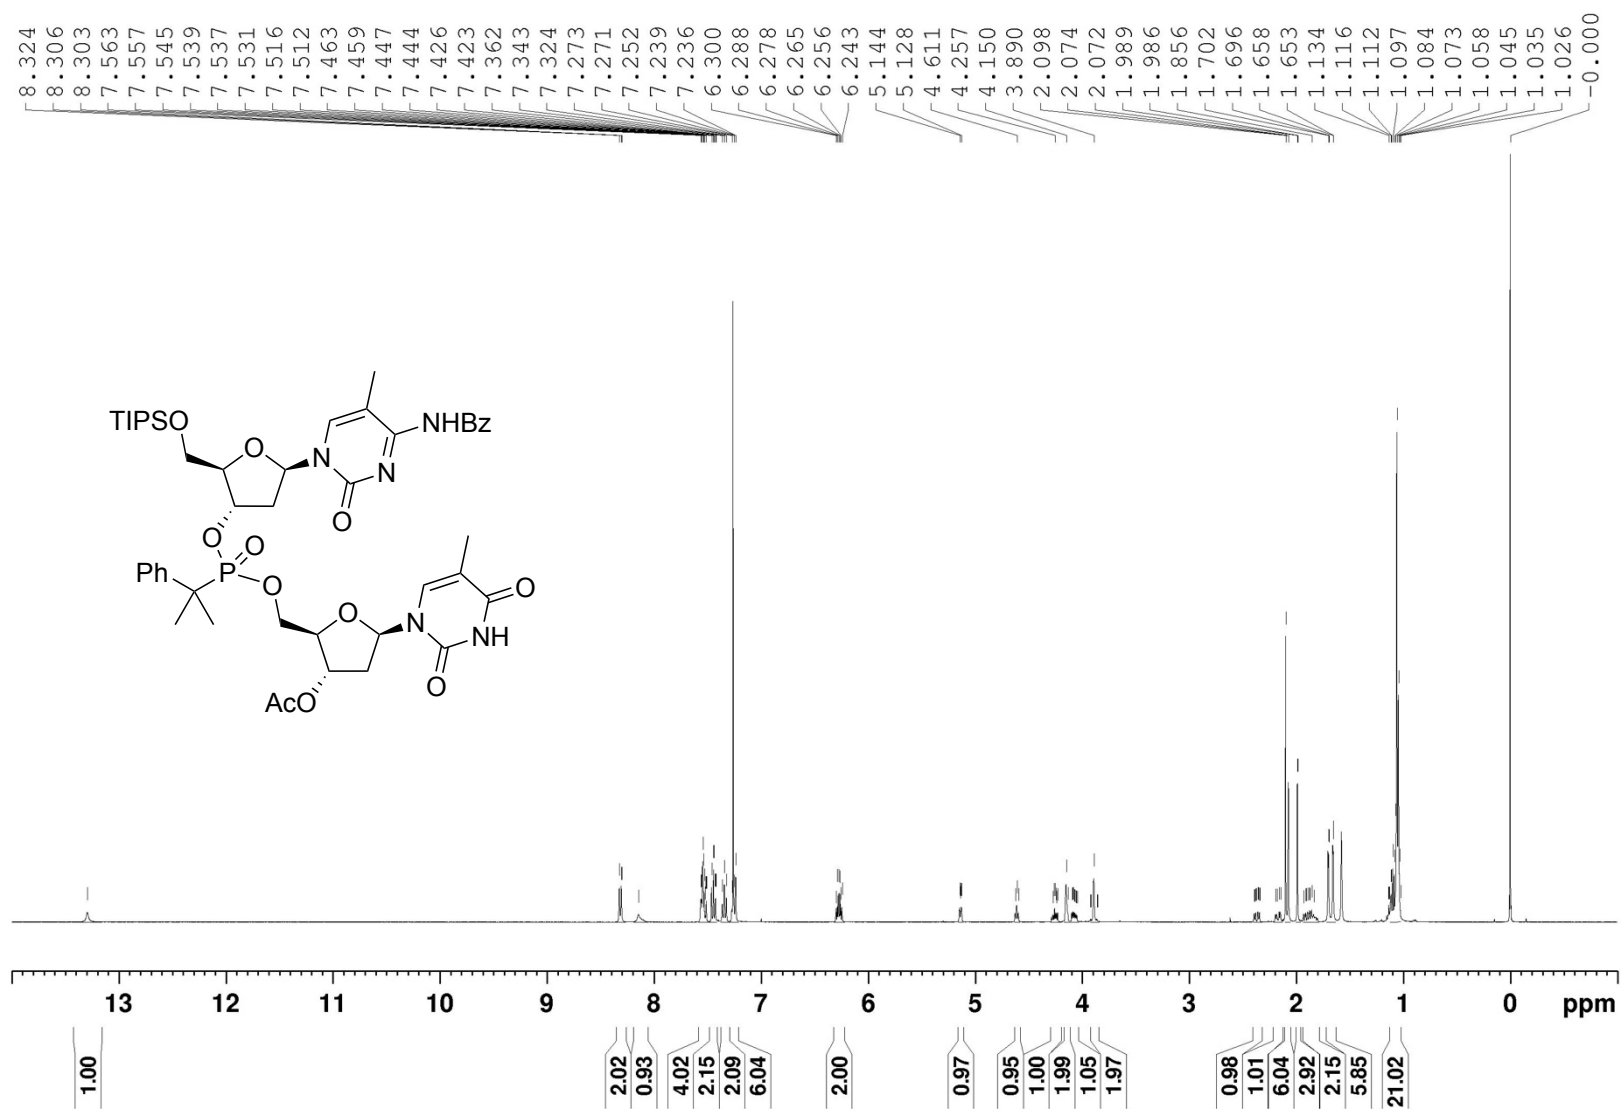

<sup>1</sup>H NMR (400 MHz, CDCl<sub>3</sub>) spectrum of **3ba-d1**

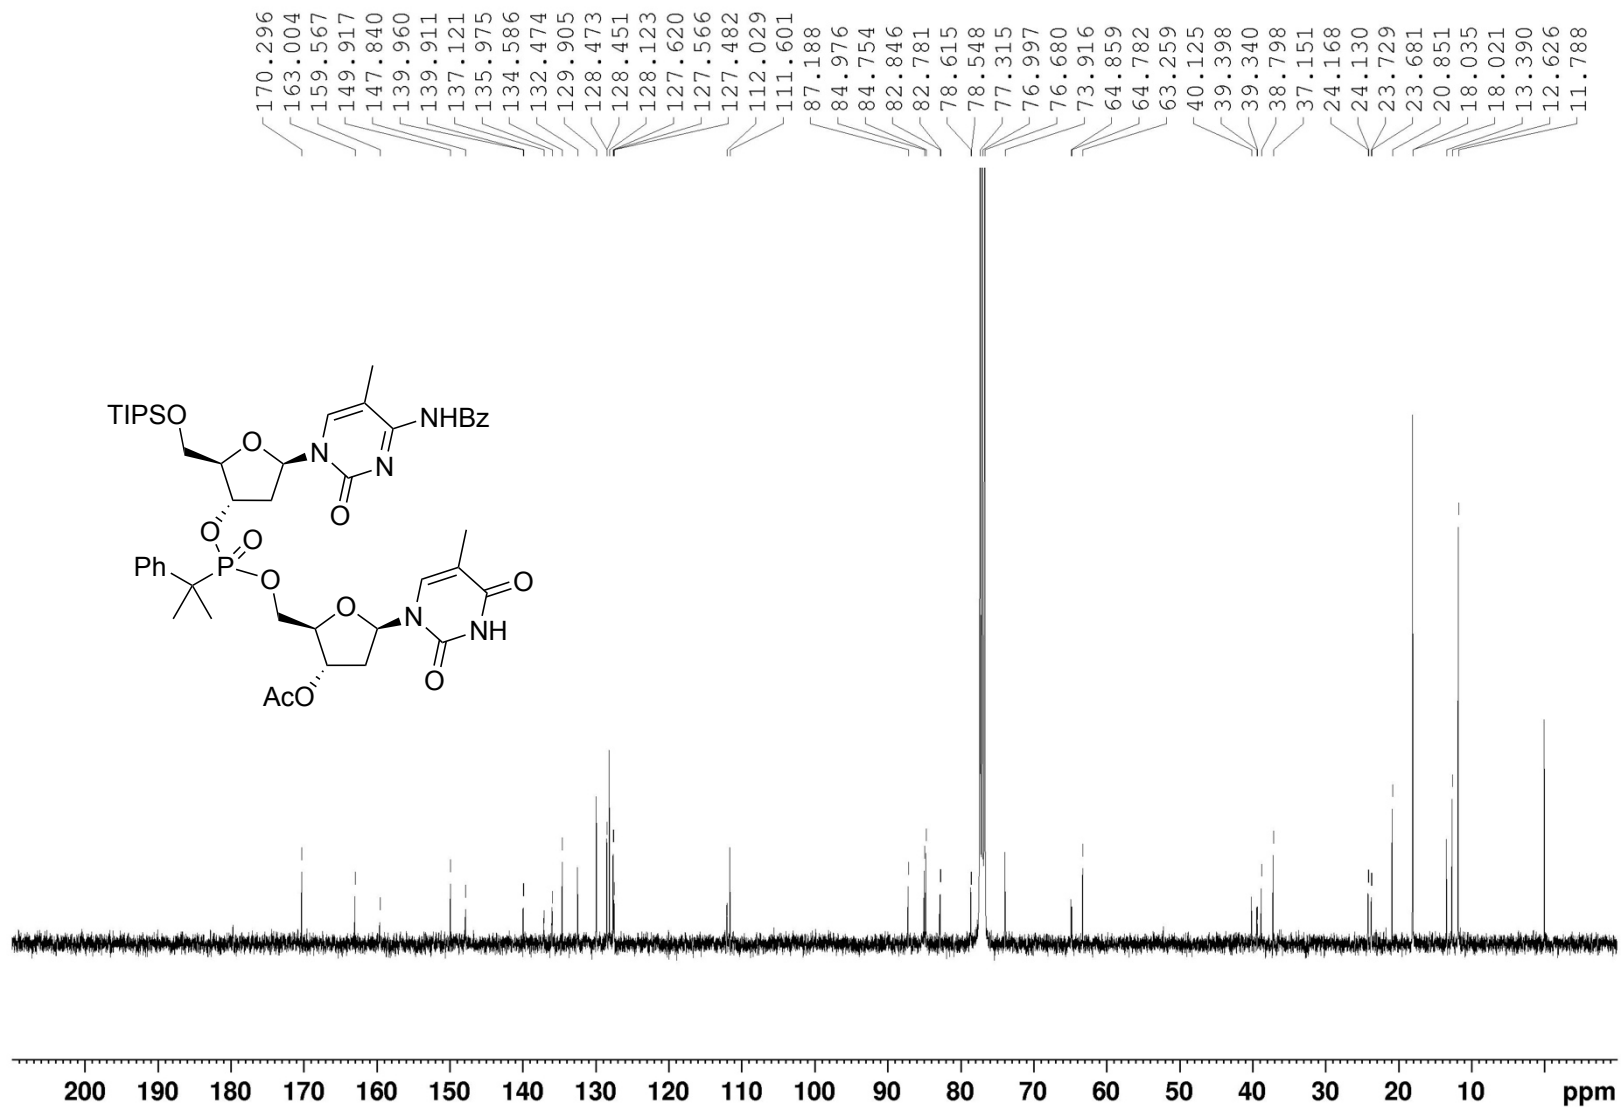

<sup>13</sup>C NMR (100.6 MHz, CDCl<sub>3</sub>) spectrum of **3ba-d1**

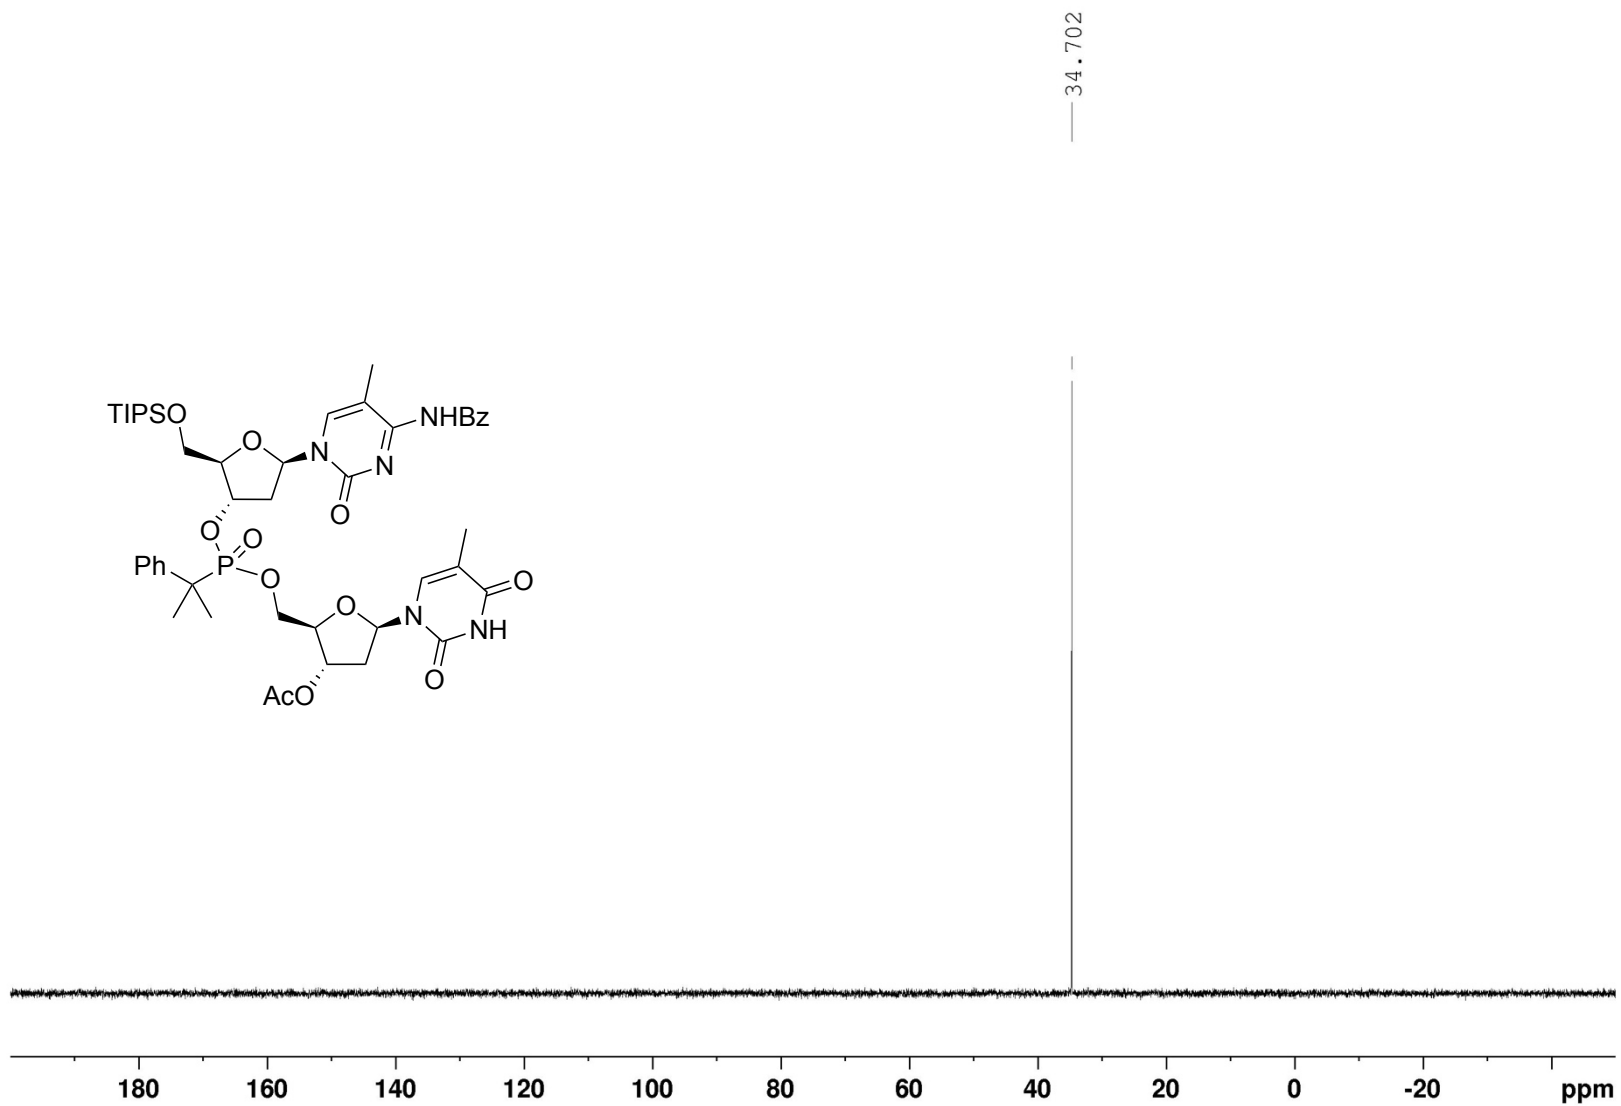

$^{31}\text{P}$  NMR (162 MHz,  $\text{CDCl}_3$ ) spectrum of **3ba-d1**



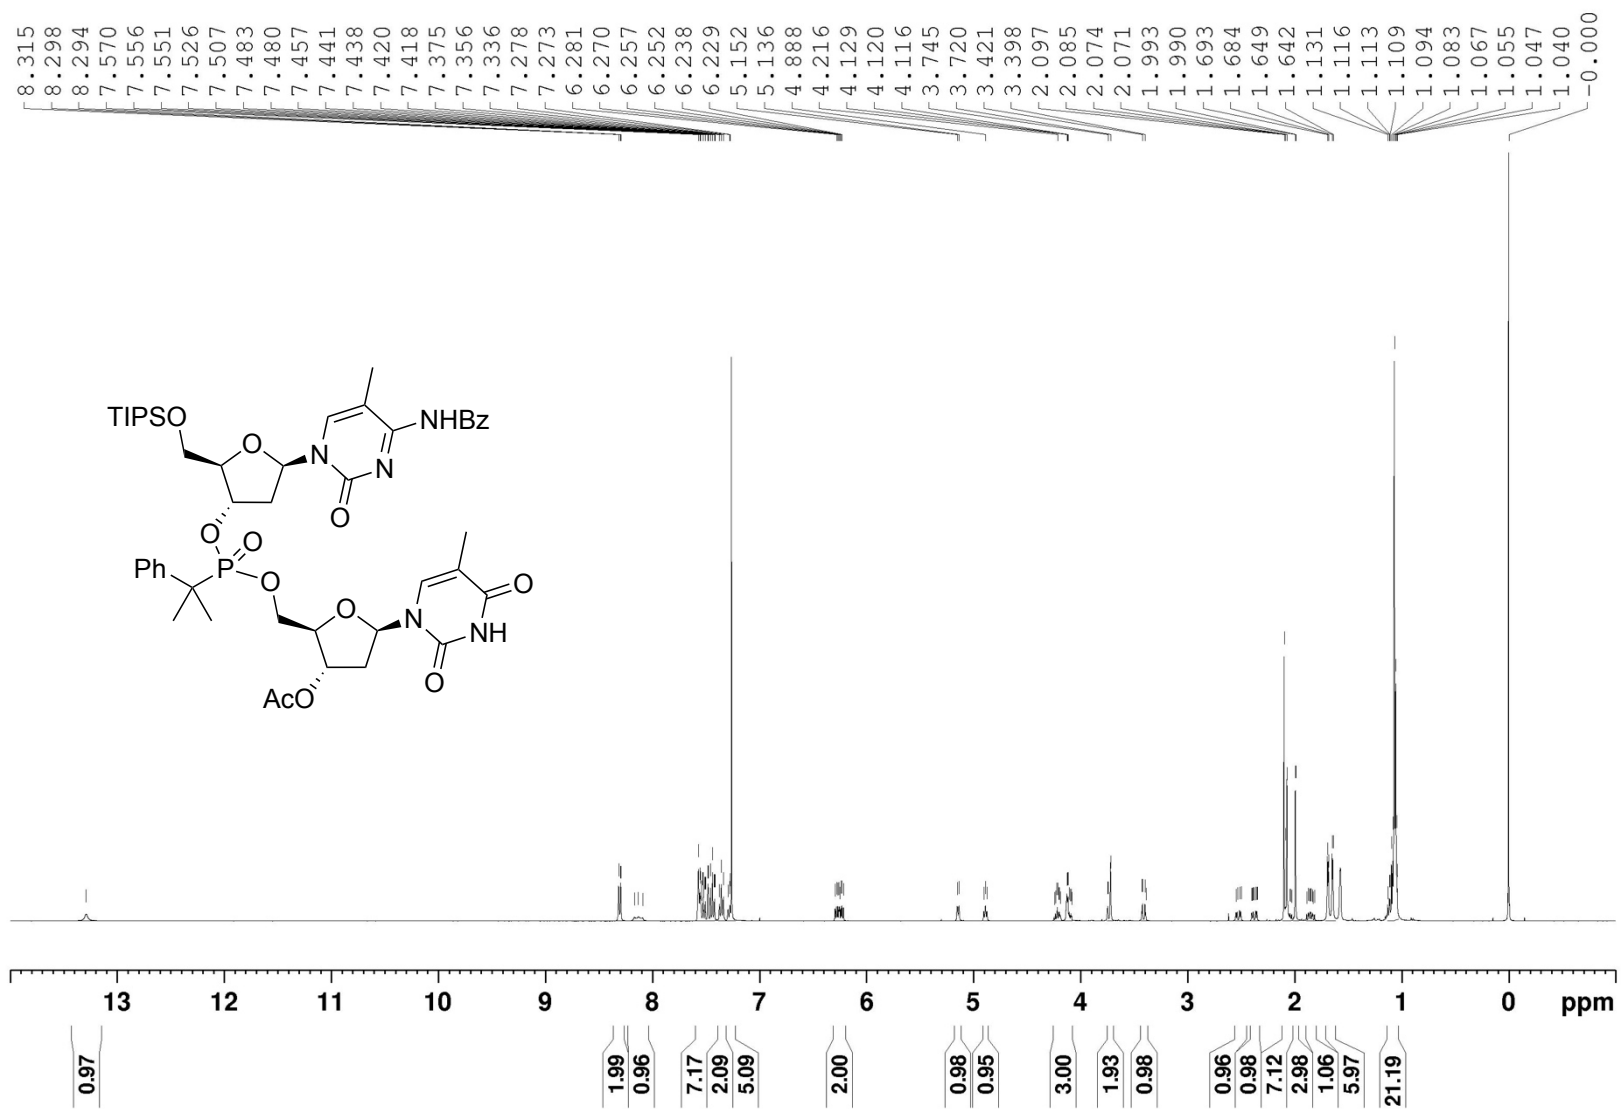

<sup>1</sup>H NMR (400 MHz, CDCl<sub>3</sub>) spectrum of **3ba-d2**

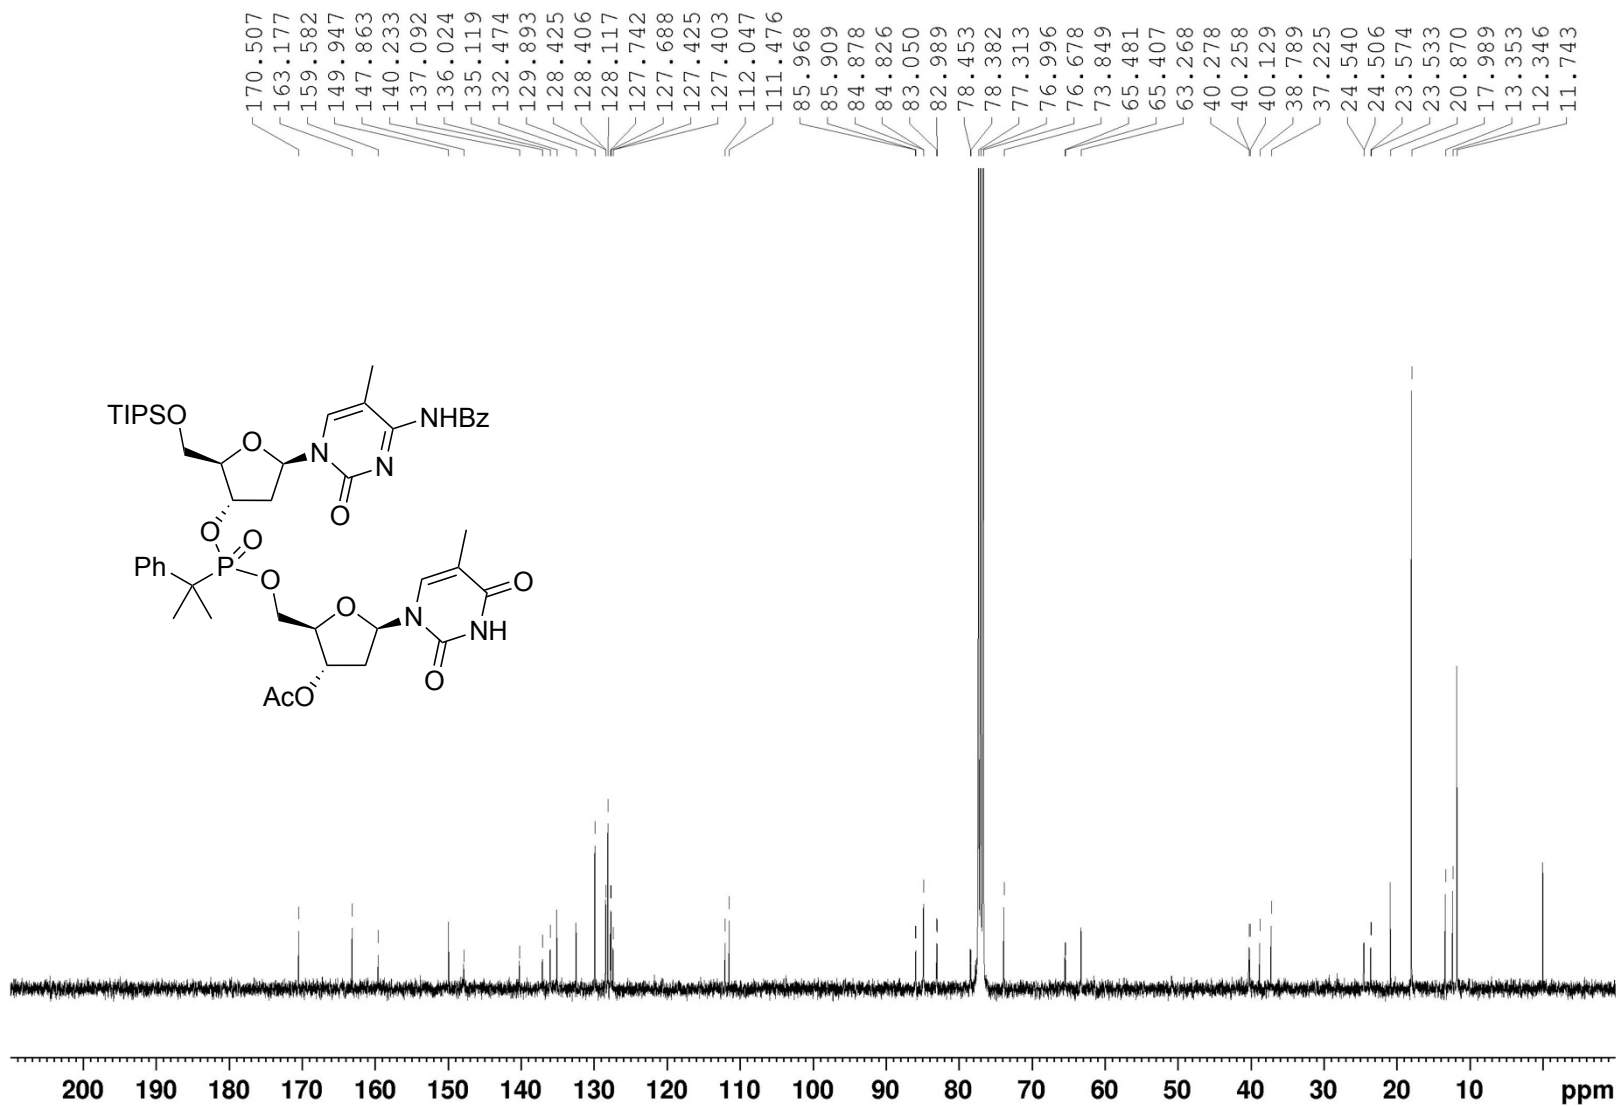

<sup>13</sup>C NMR (100.6 MHz, CDCl<sub>3</sub>) spectrum of **3ba-d2**

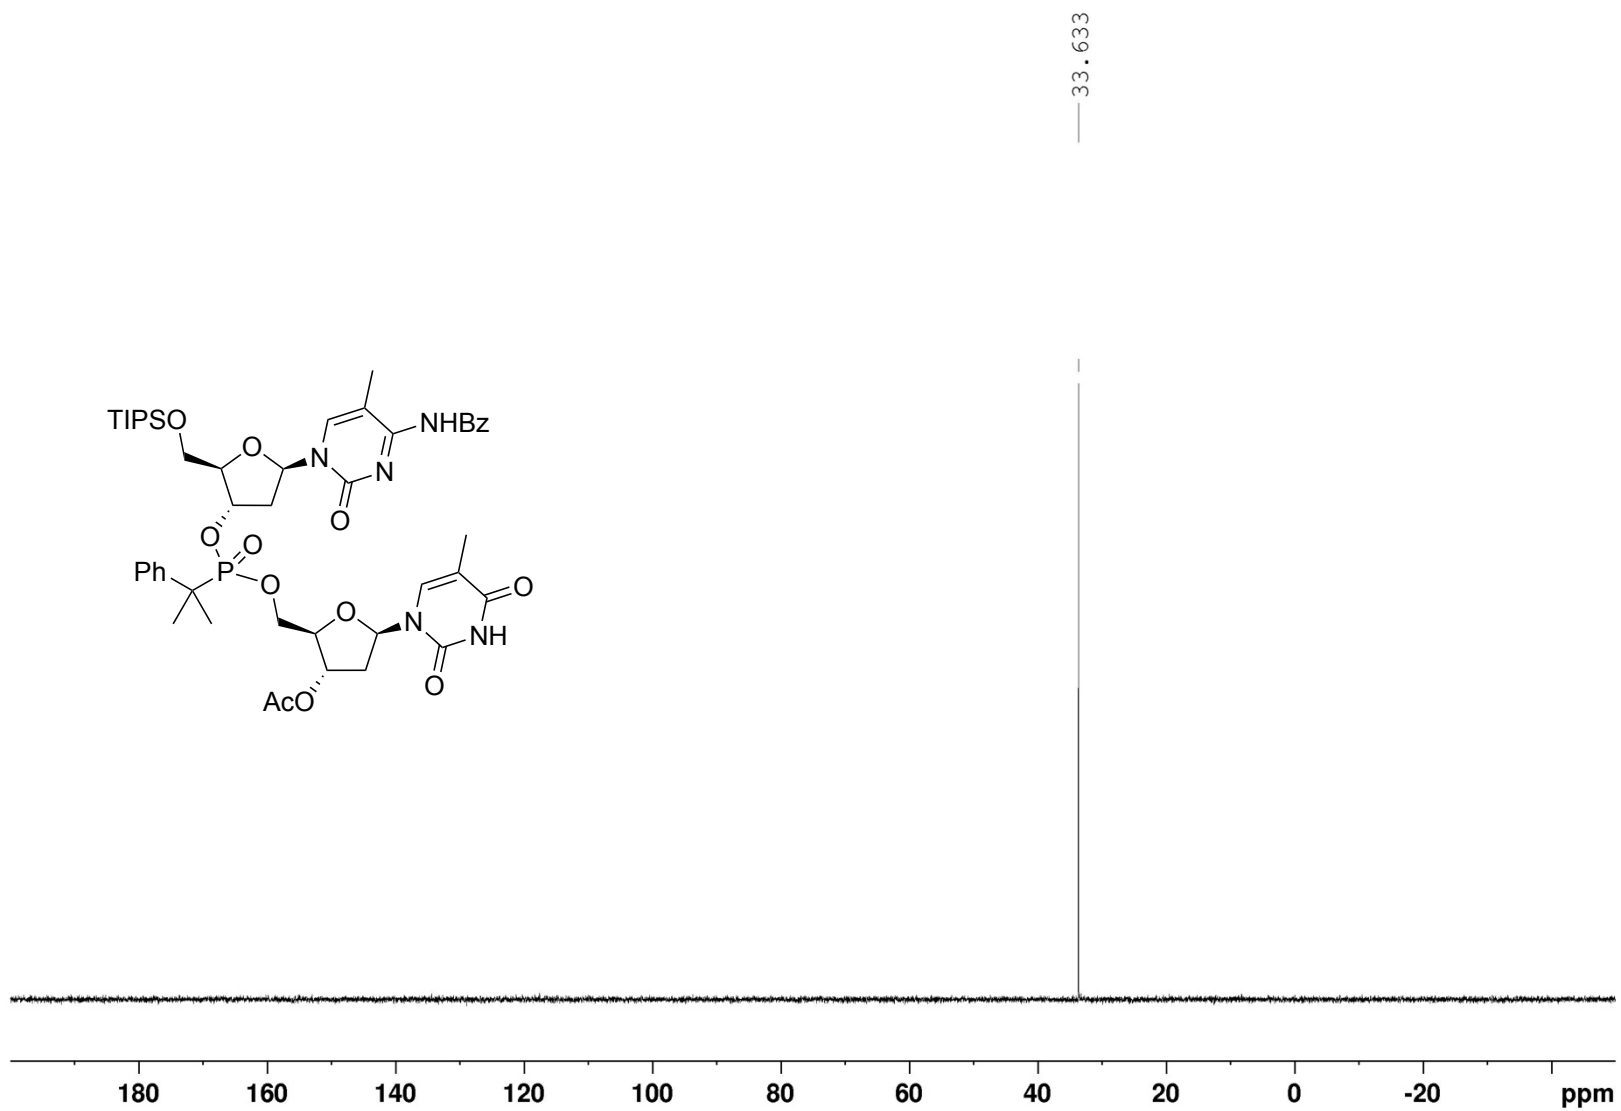

$^{31}\text{P}$  NMR (162 MHz,  $\text{CDCl}_3$ ) spectrum of **3ba-d2**

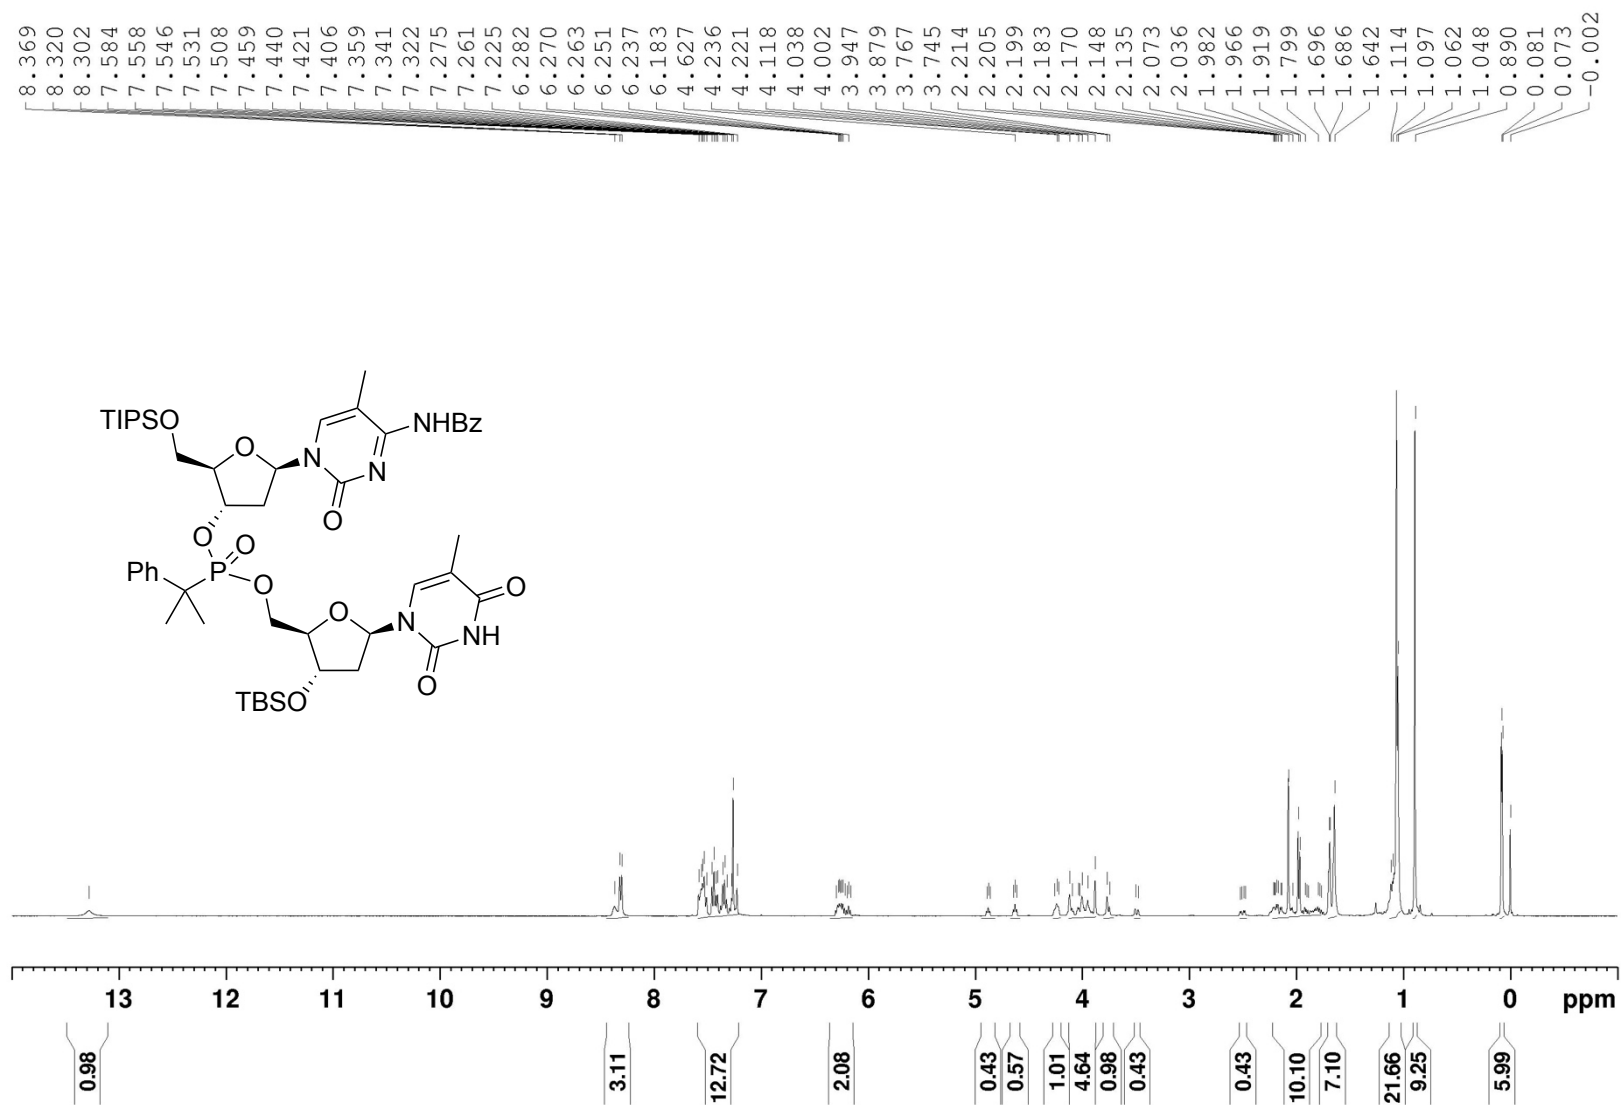

<sup>1</sup>H NMR (400 MHz, CDCl<sub>3</sub>) spectrum of **3ca**

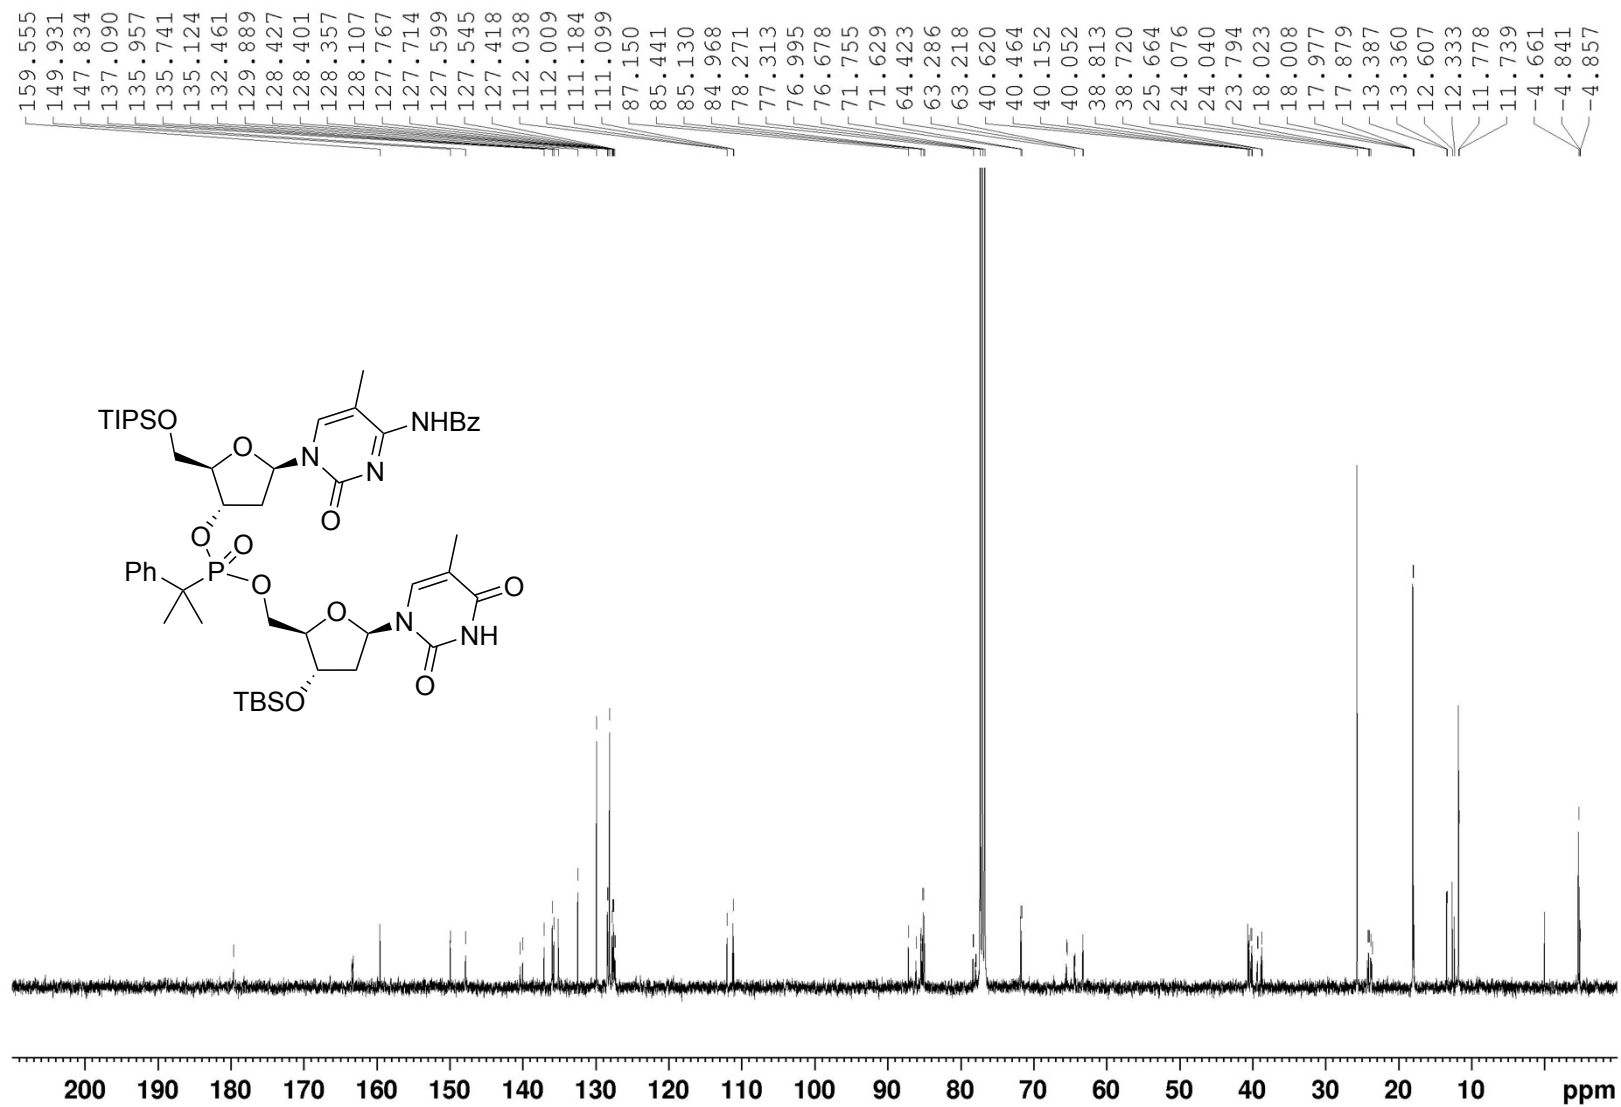

<sup>13</sup>C NMR (100.6 MHz, CDCl<sub>3</sub>) spectrum of **3ca**

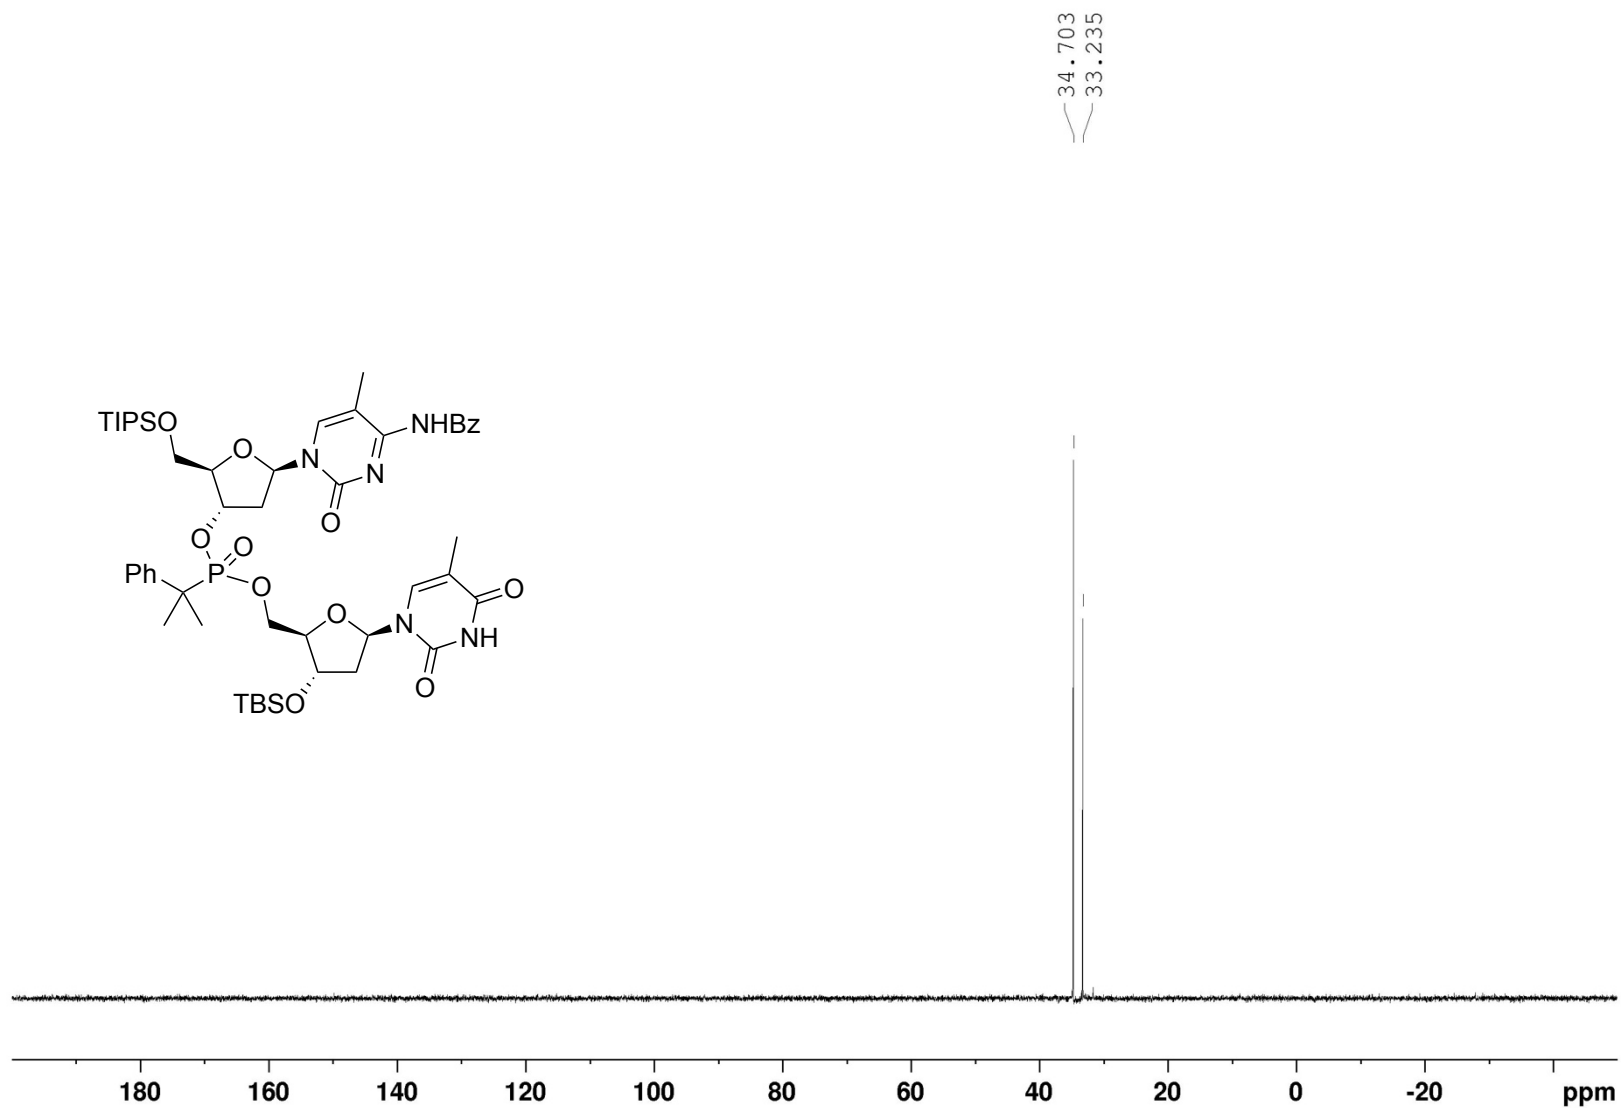

$^{31}\text{P}$  NMR (162 MHz,  $\text{CDCl}_3$ ) spectrum of **3ca**

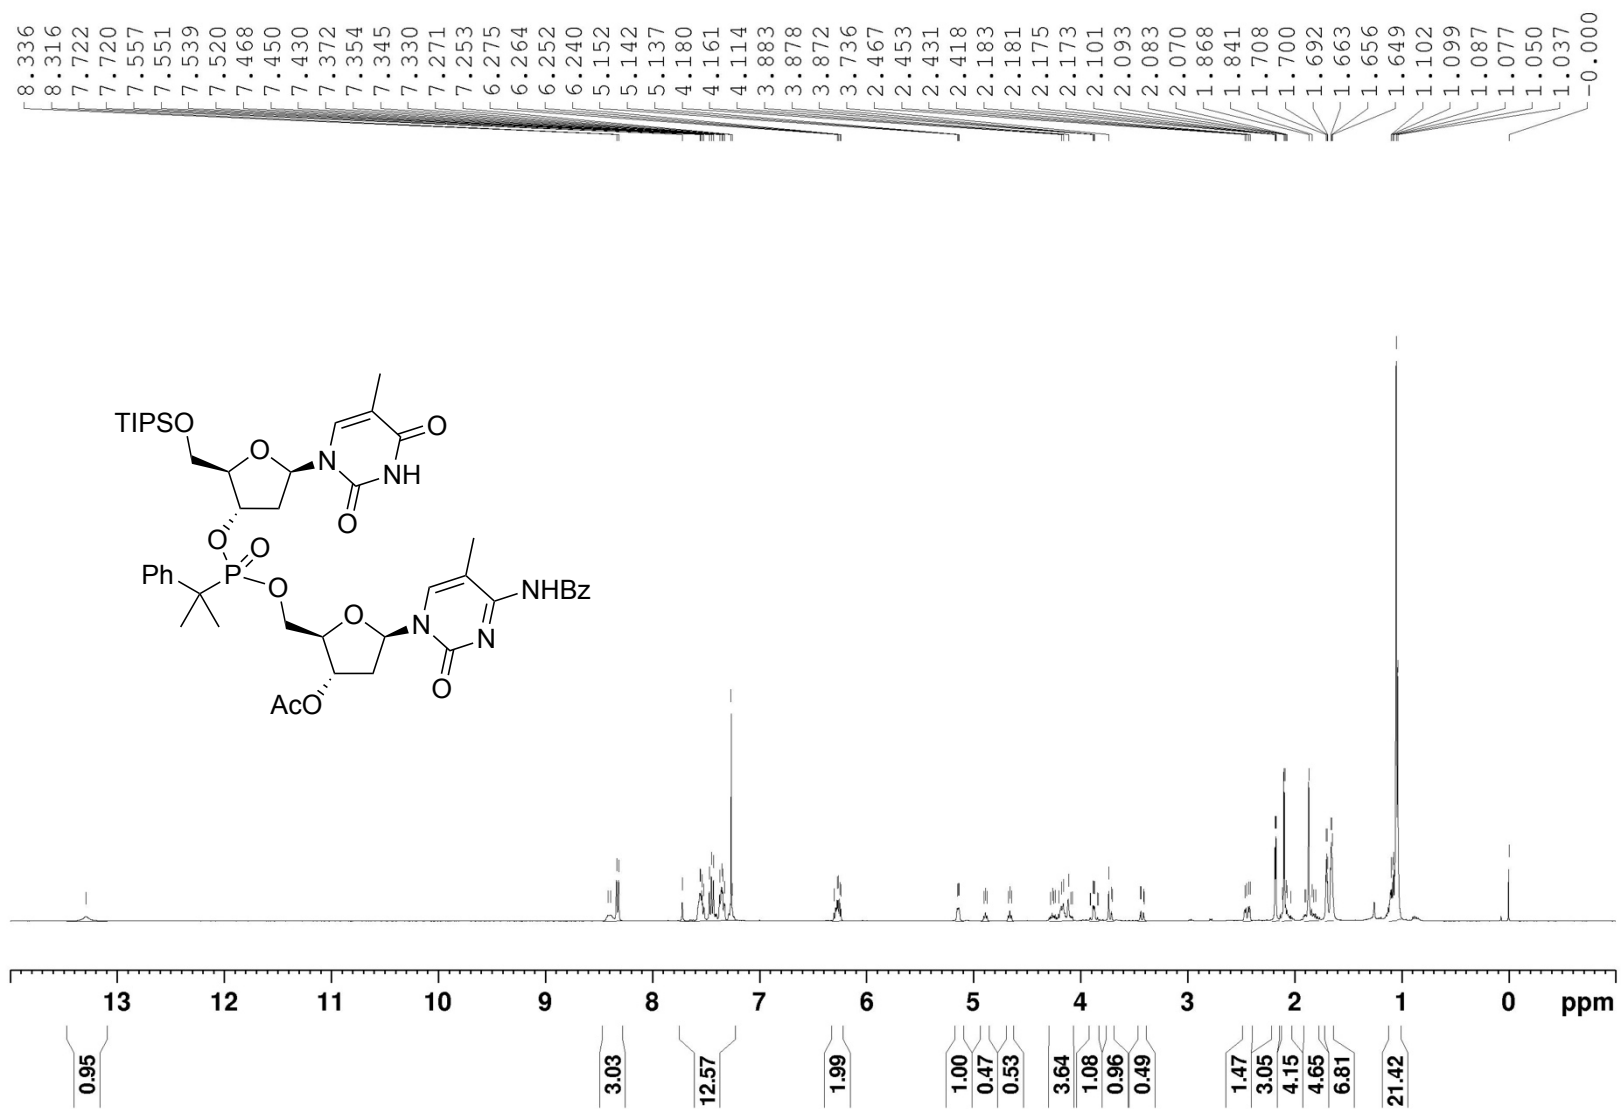

<sup>1</sup>H NMR (400 MHz, CDCl<sub>3</sub>) spectrum of **3da**

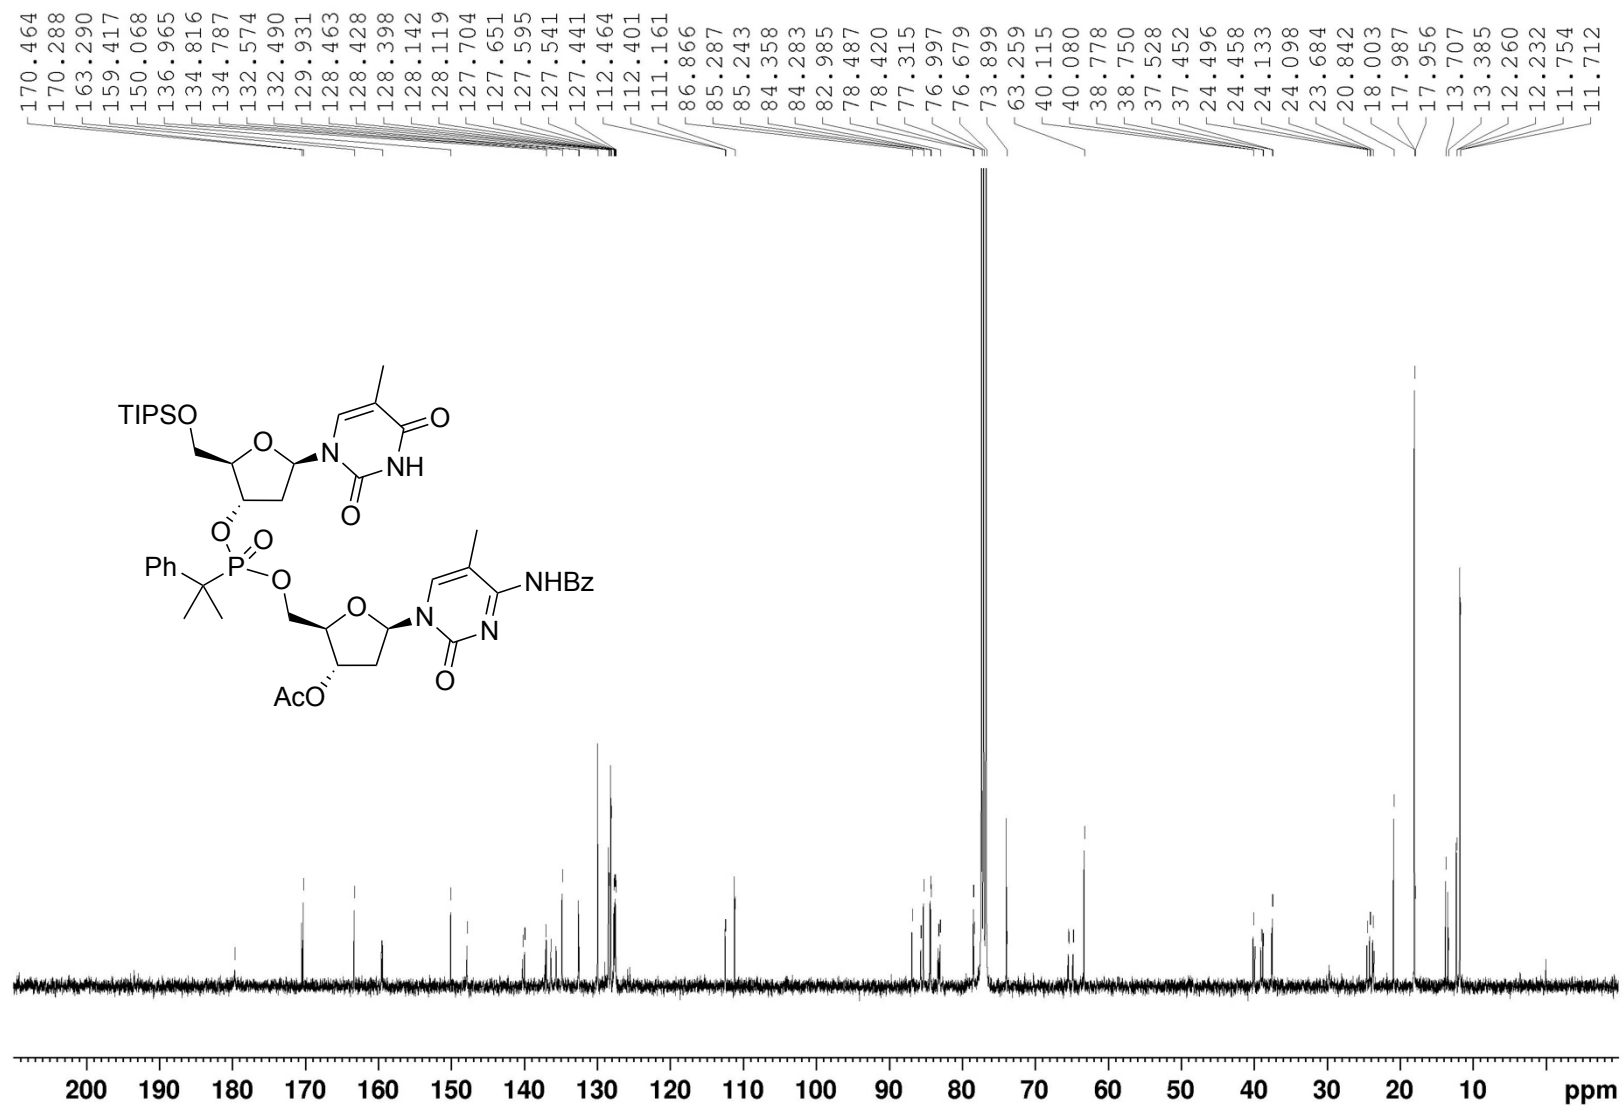

<sup>13</sup>C NMR (100.6 MHz, CDCl<sub>3</sub>) spectrum of **3da**



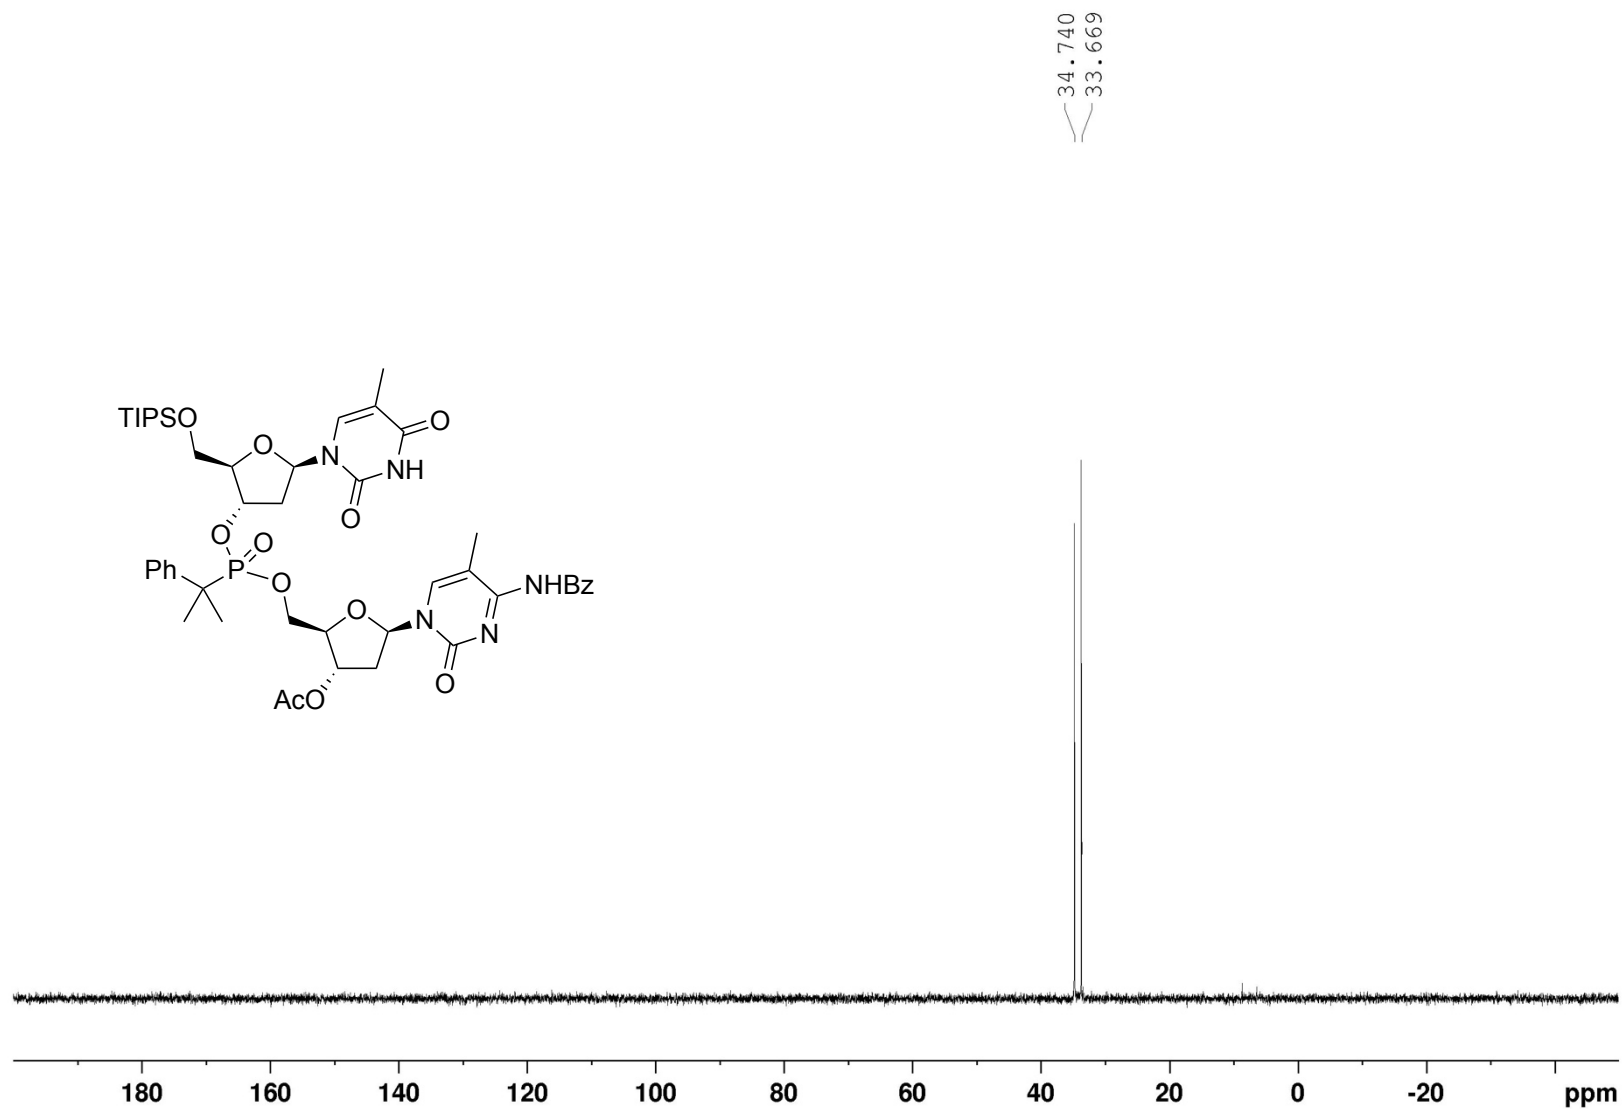

$^{31}\text{P}$  NMR (162 MHz,  $\text{CDCl}_3$ ) spectrum of **3da**

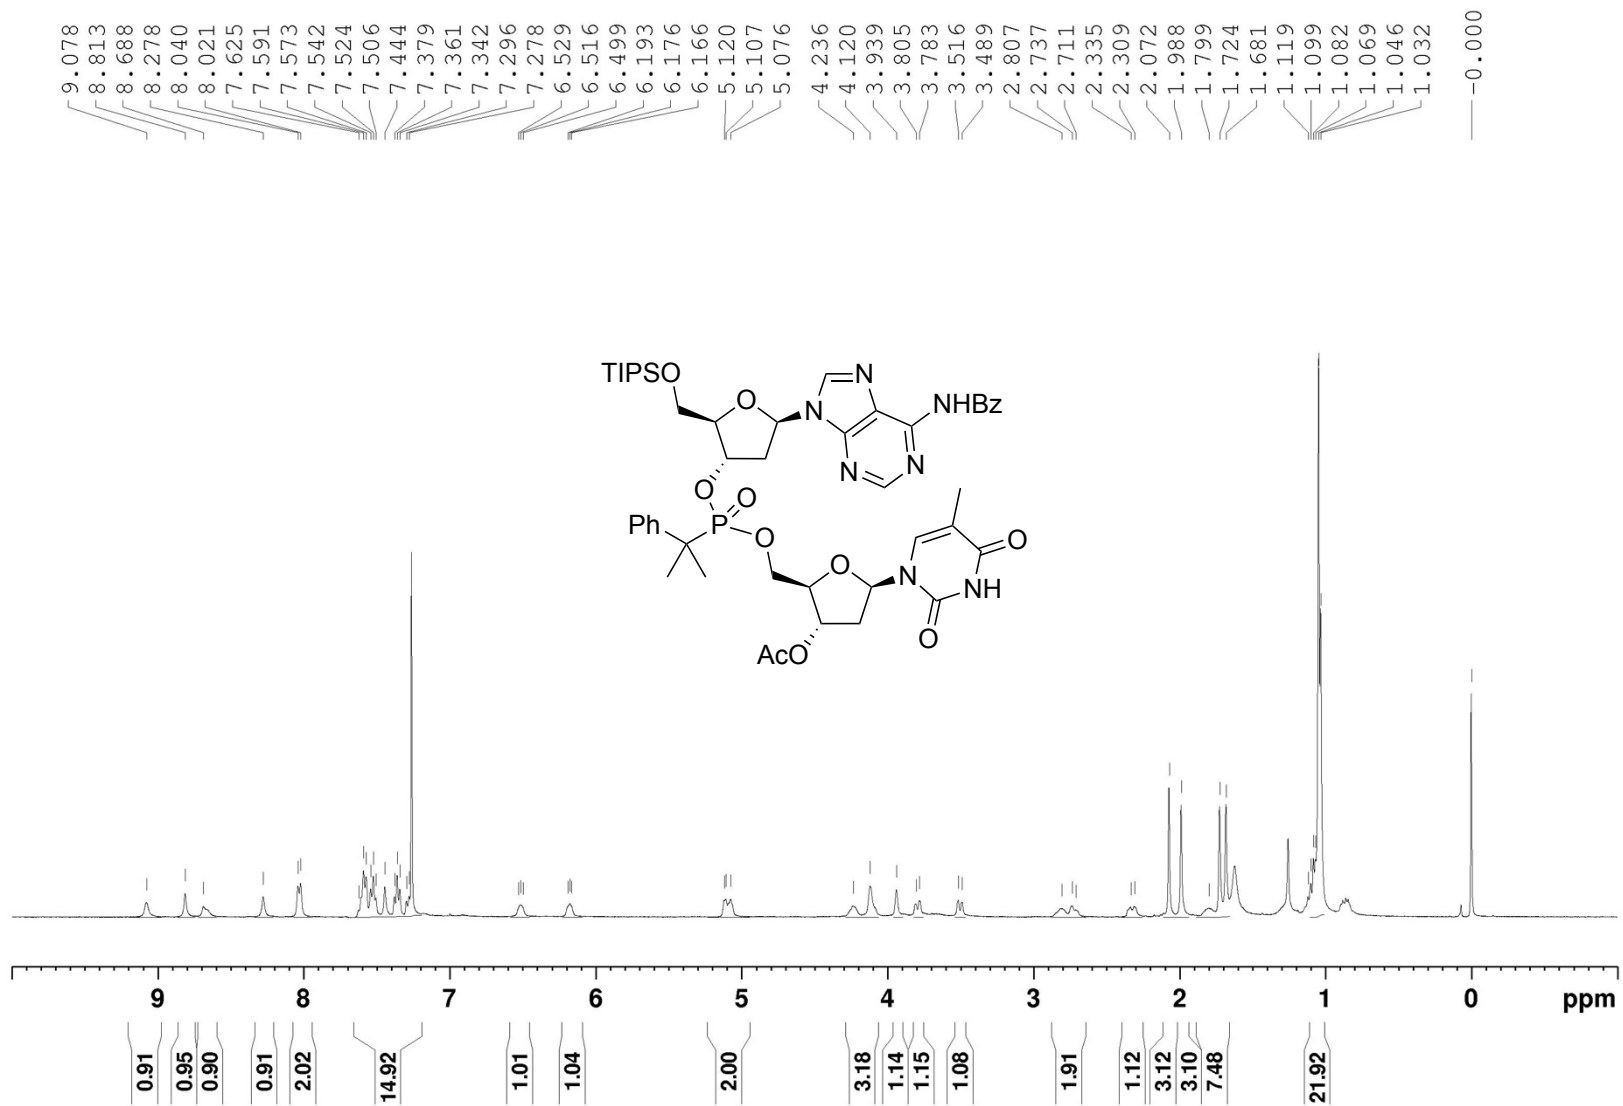

<sup>1</sup>H NMR (400 MHz, CDCl<sub>3</sub>) spectrum of **3ea-d1**

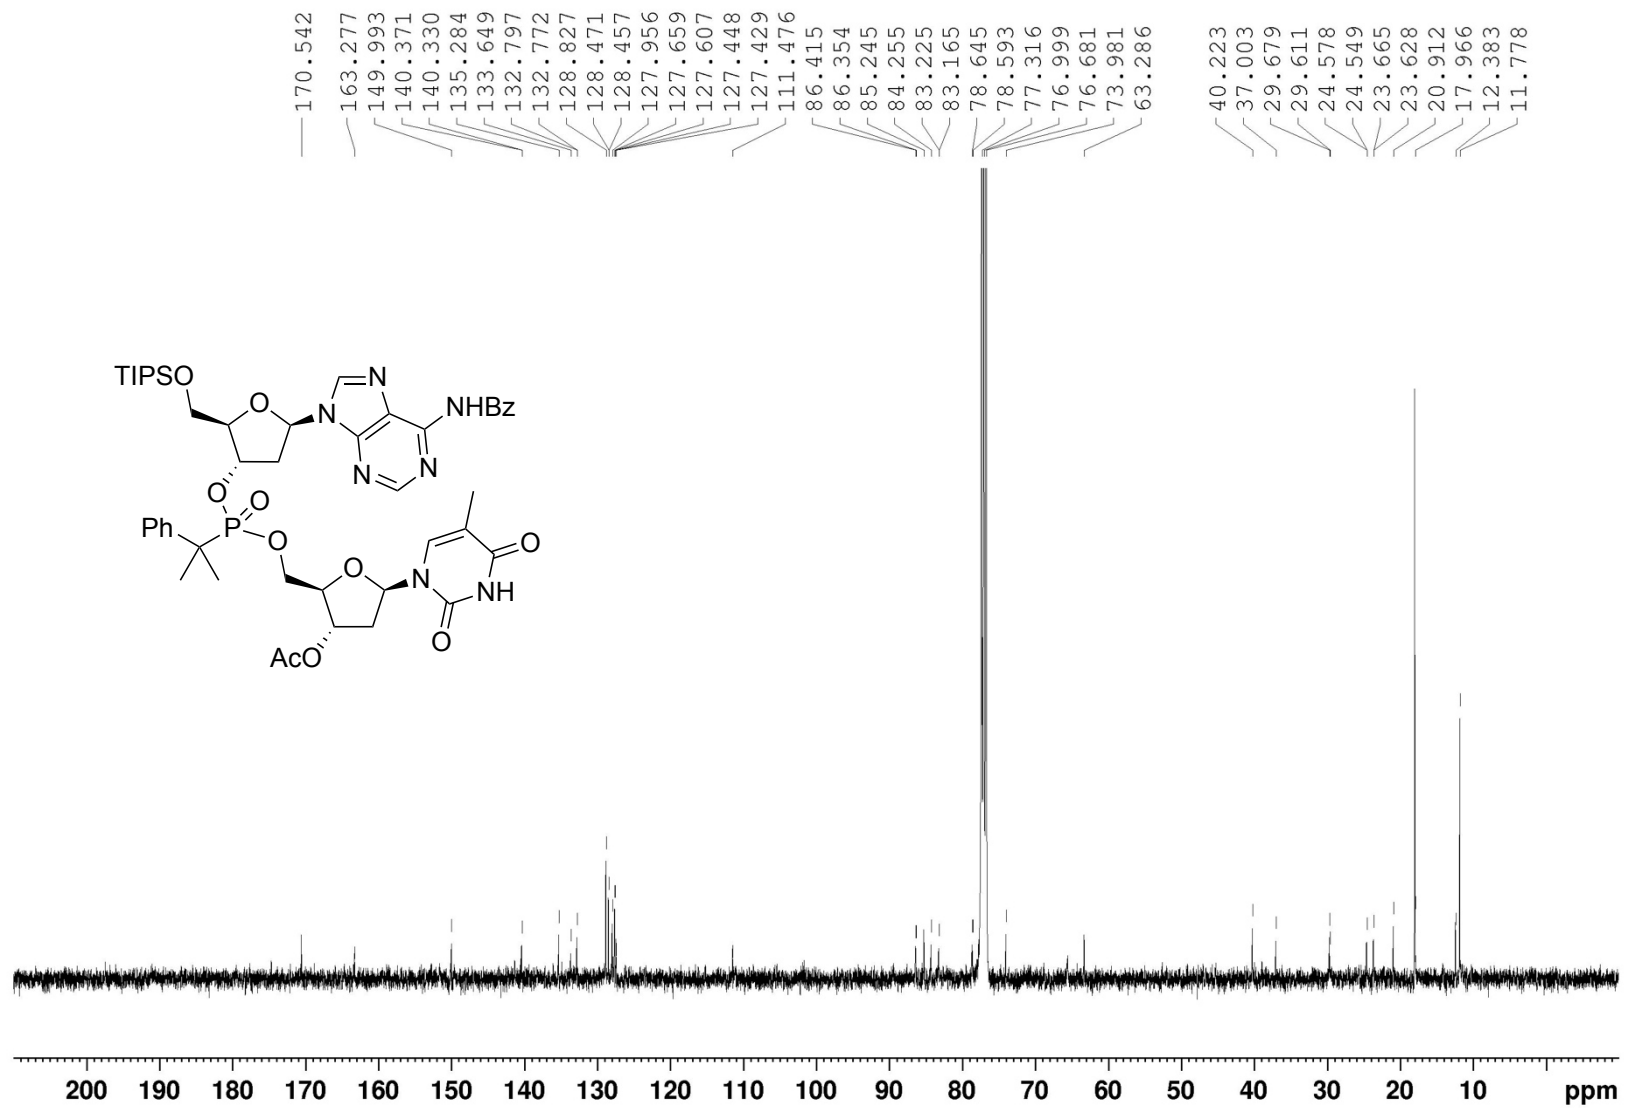

<sup>13</sup>C NMR (100.6 MHz, CDCl<sub>3</sub>) spectrum of **3ea-d1**

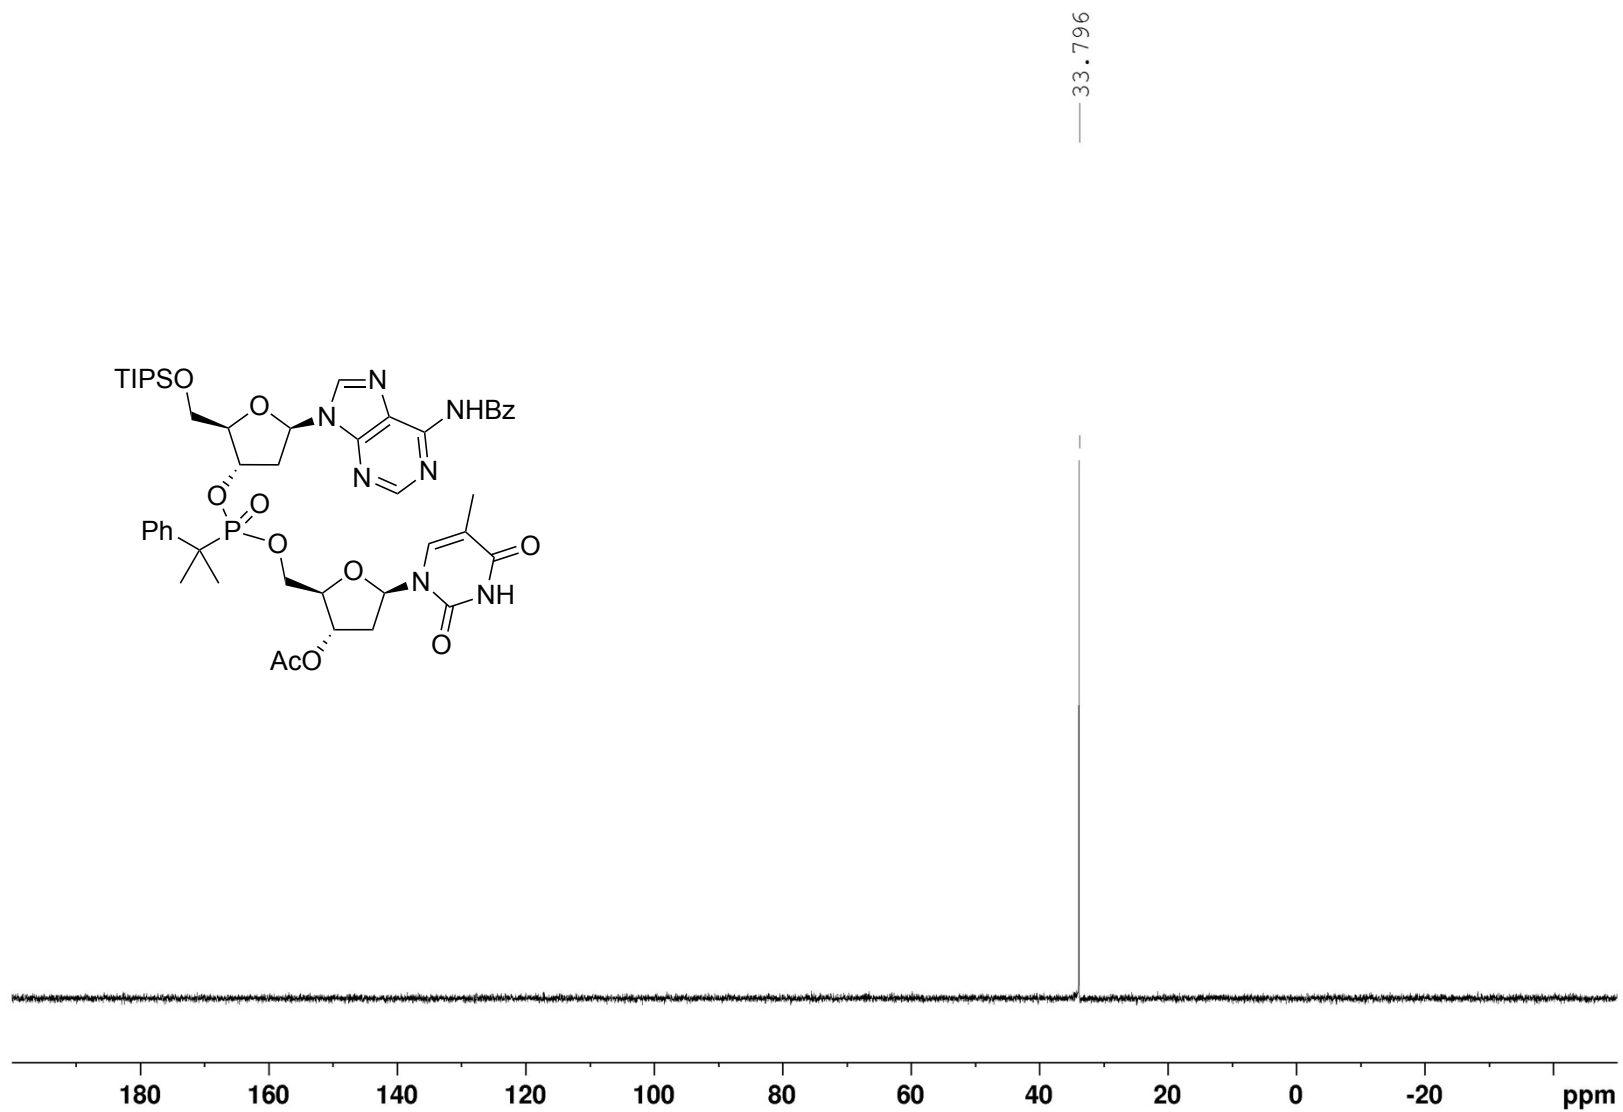

$^{31}\text{P}$  NMR (162 MHz,  $\text{CDCl}_3$ ) spectrum of **3ea-d1**

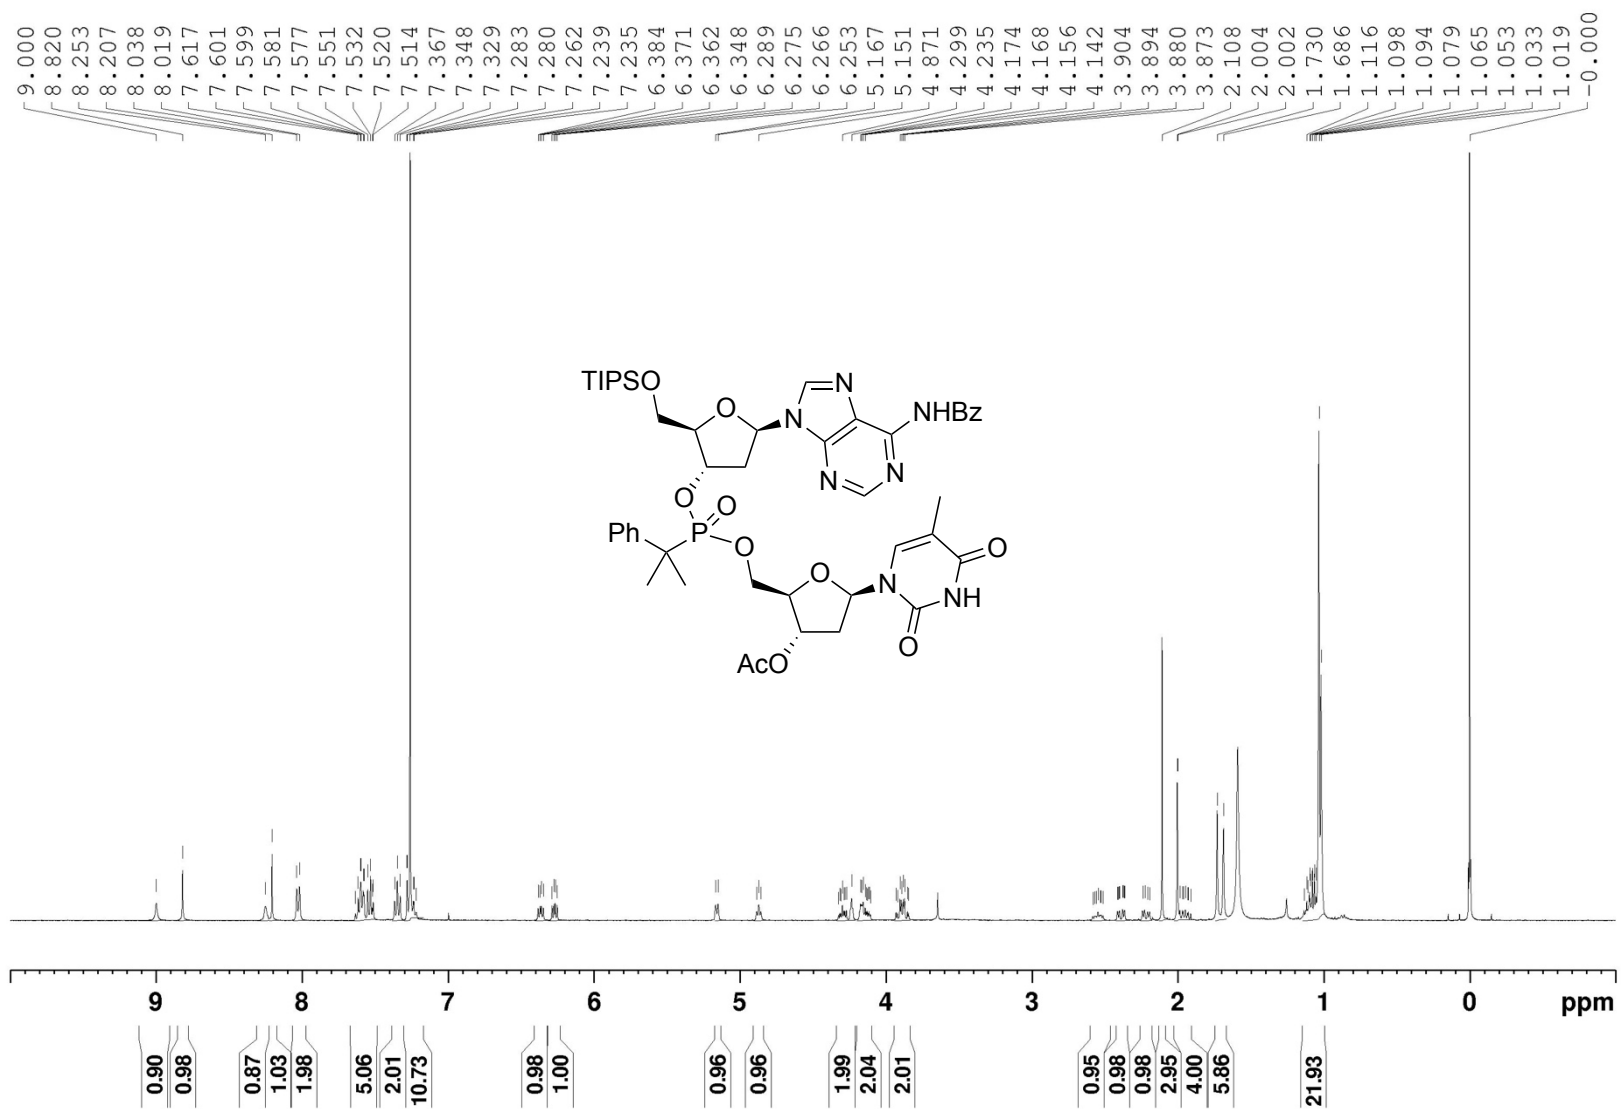

<sup>1</sup>H NMR (400 MHz, CDCl<sub>3</sub>) spectrum of **3ea-d2**

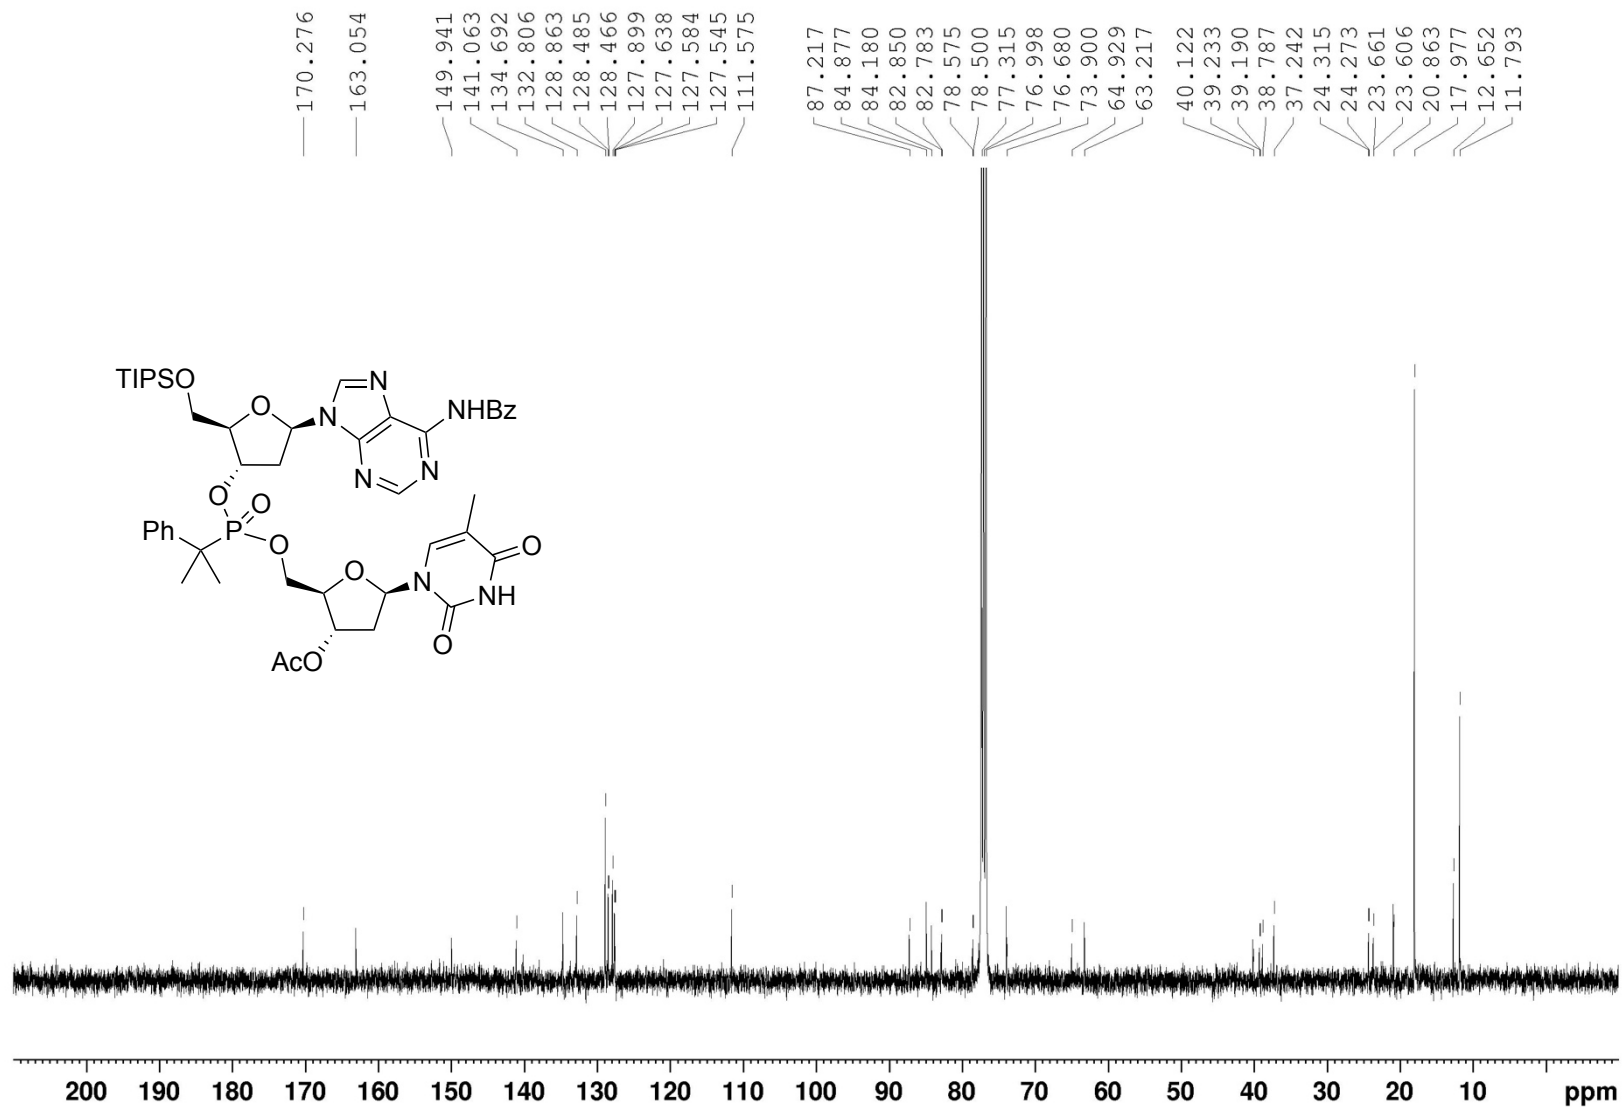

<sup>13</sup>C NMR (100.6 MHz, CDCl<sub>3</sub>) spectrum of **3ea-d2**

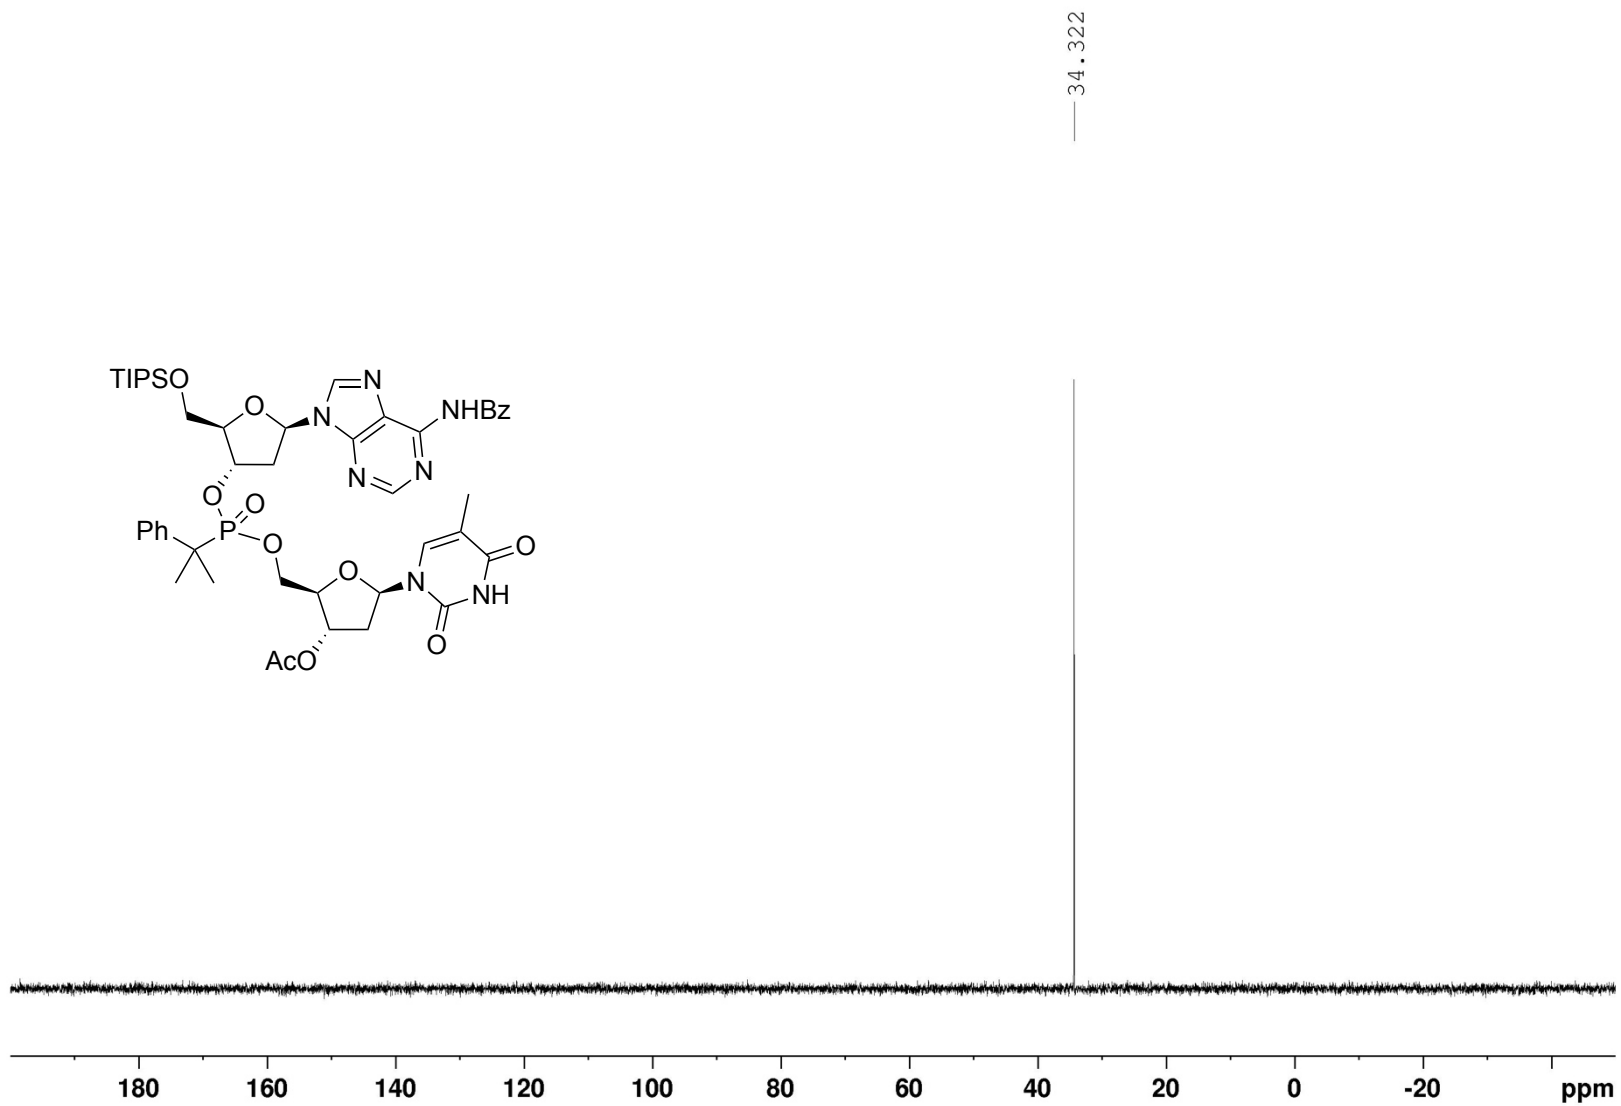

$^{31}\text{P}$  NMR (162 MHz,  $\text{CDCl}_3$ ) spectrum of **3ea-d2**

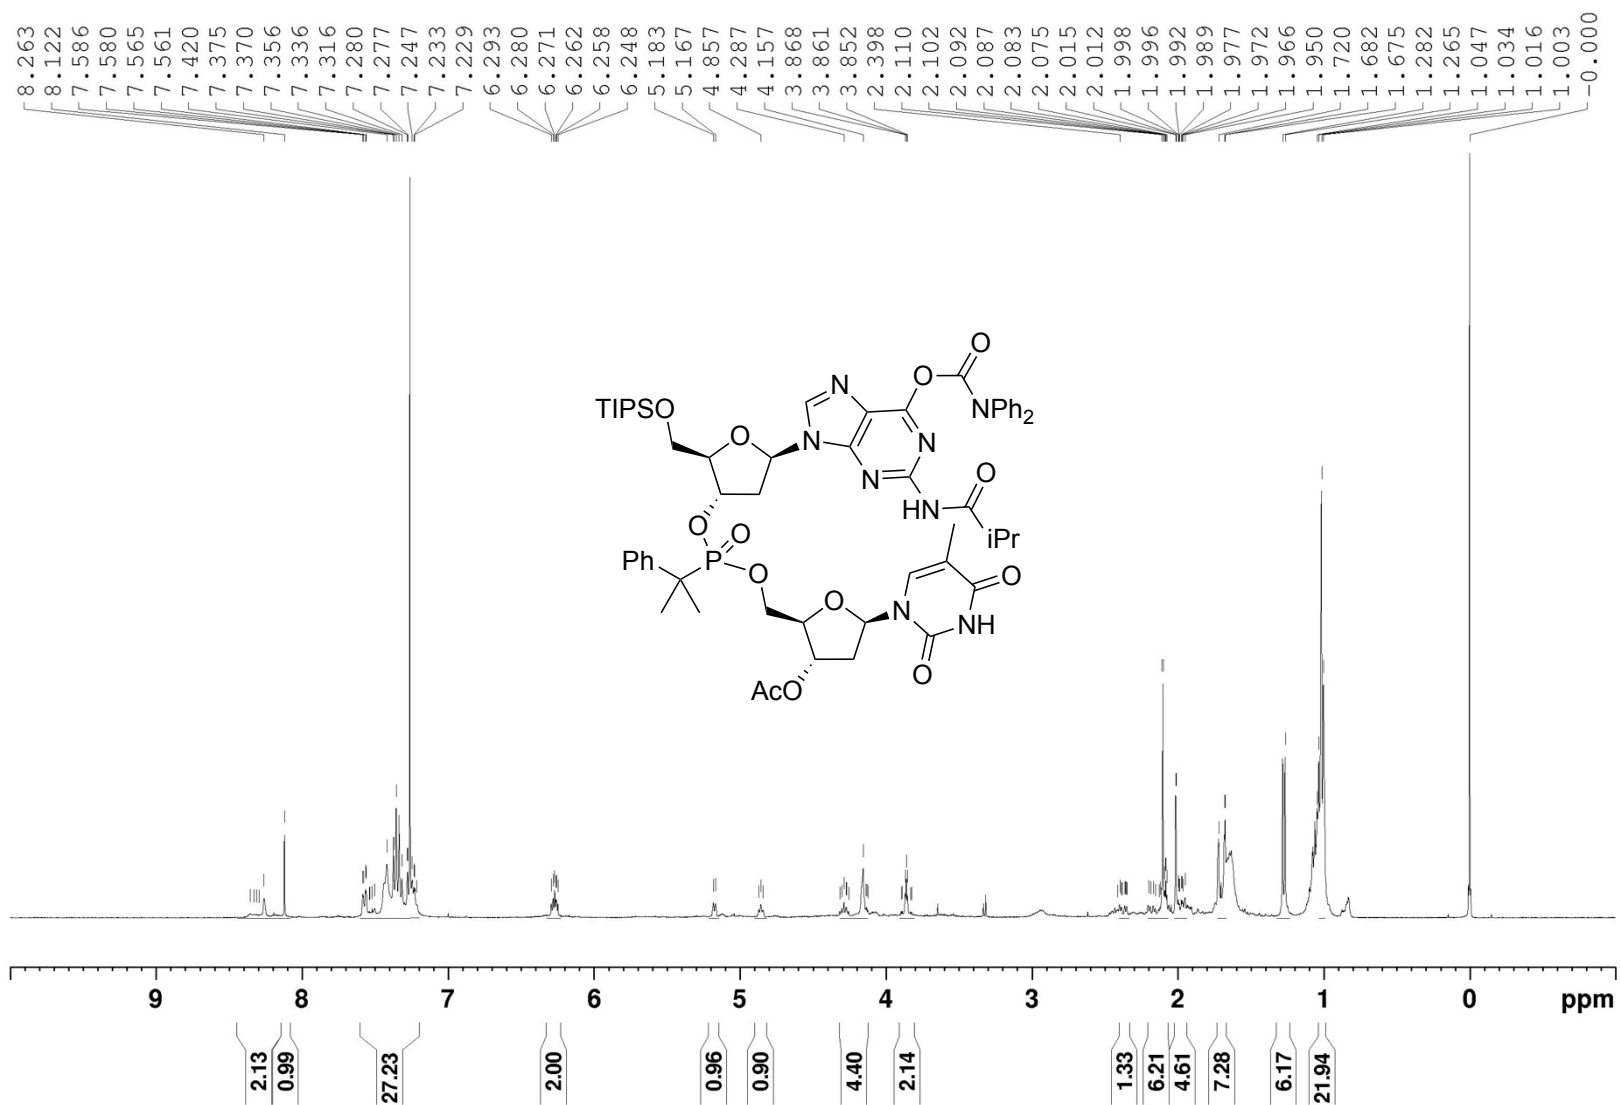

<sup>1</sup>H NMR (400 MHz, CDCl<sub>3</sub>) spectrum of **3fa-d1**



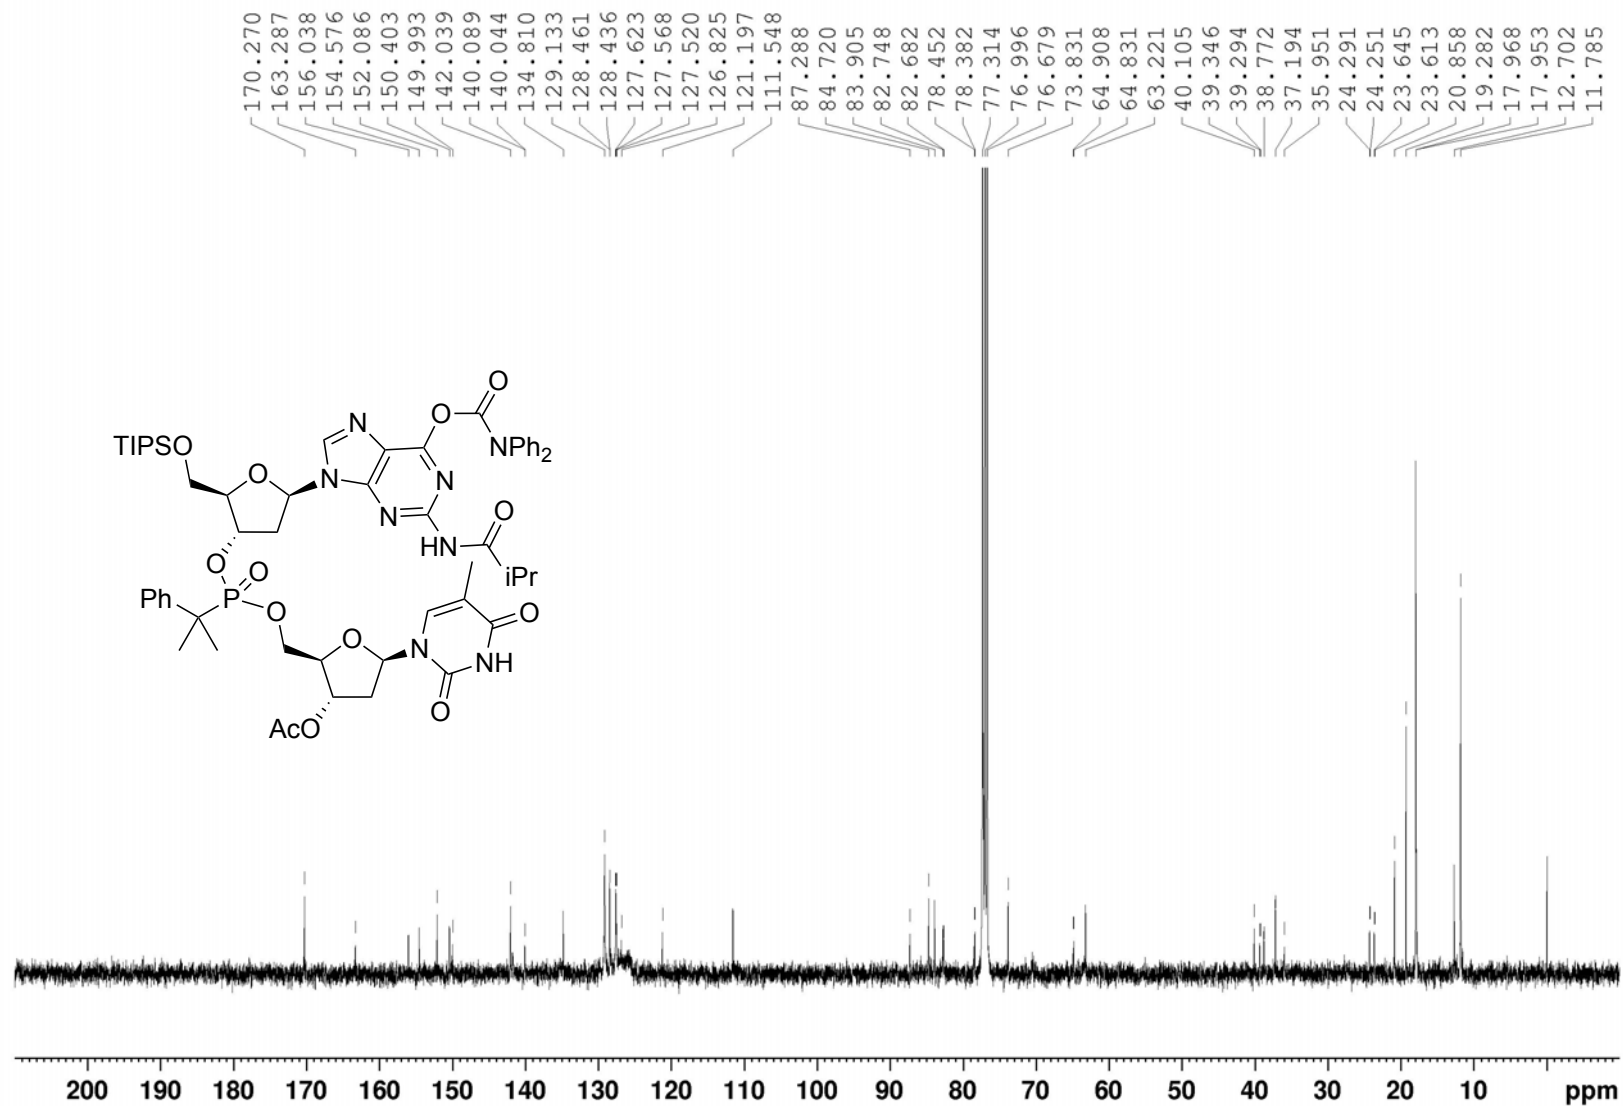

<sup>13</sup>C NMR (100.6 MHz, CDCl<sub>3</sub>) spectrum of **3fa-d1**

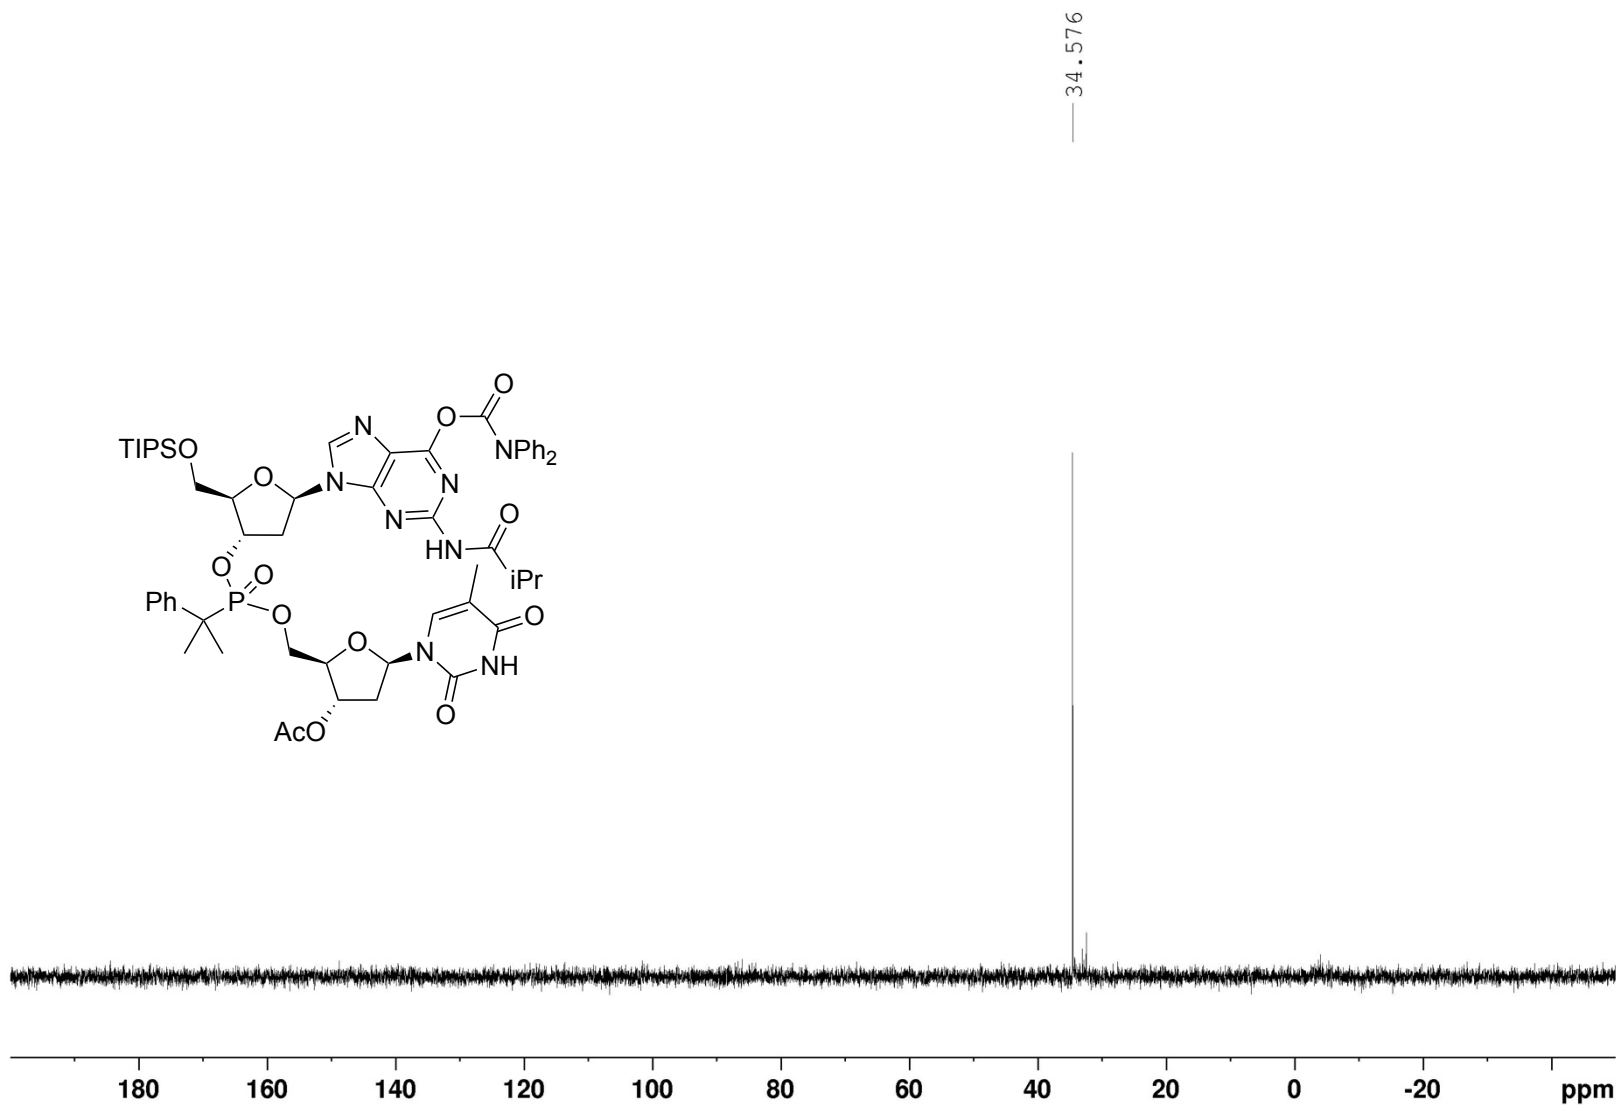

$^{31}\text{P}$  NMR (162 MHz,  $\text{CDCl}_3$ ) spectrum of **3fa-d1**

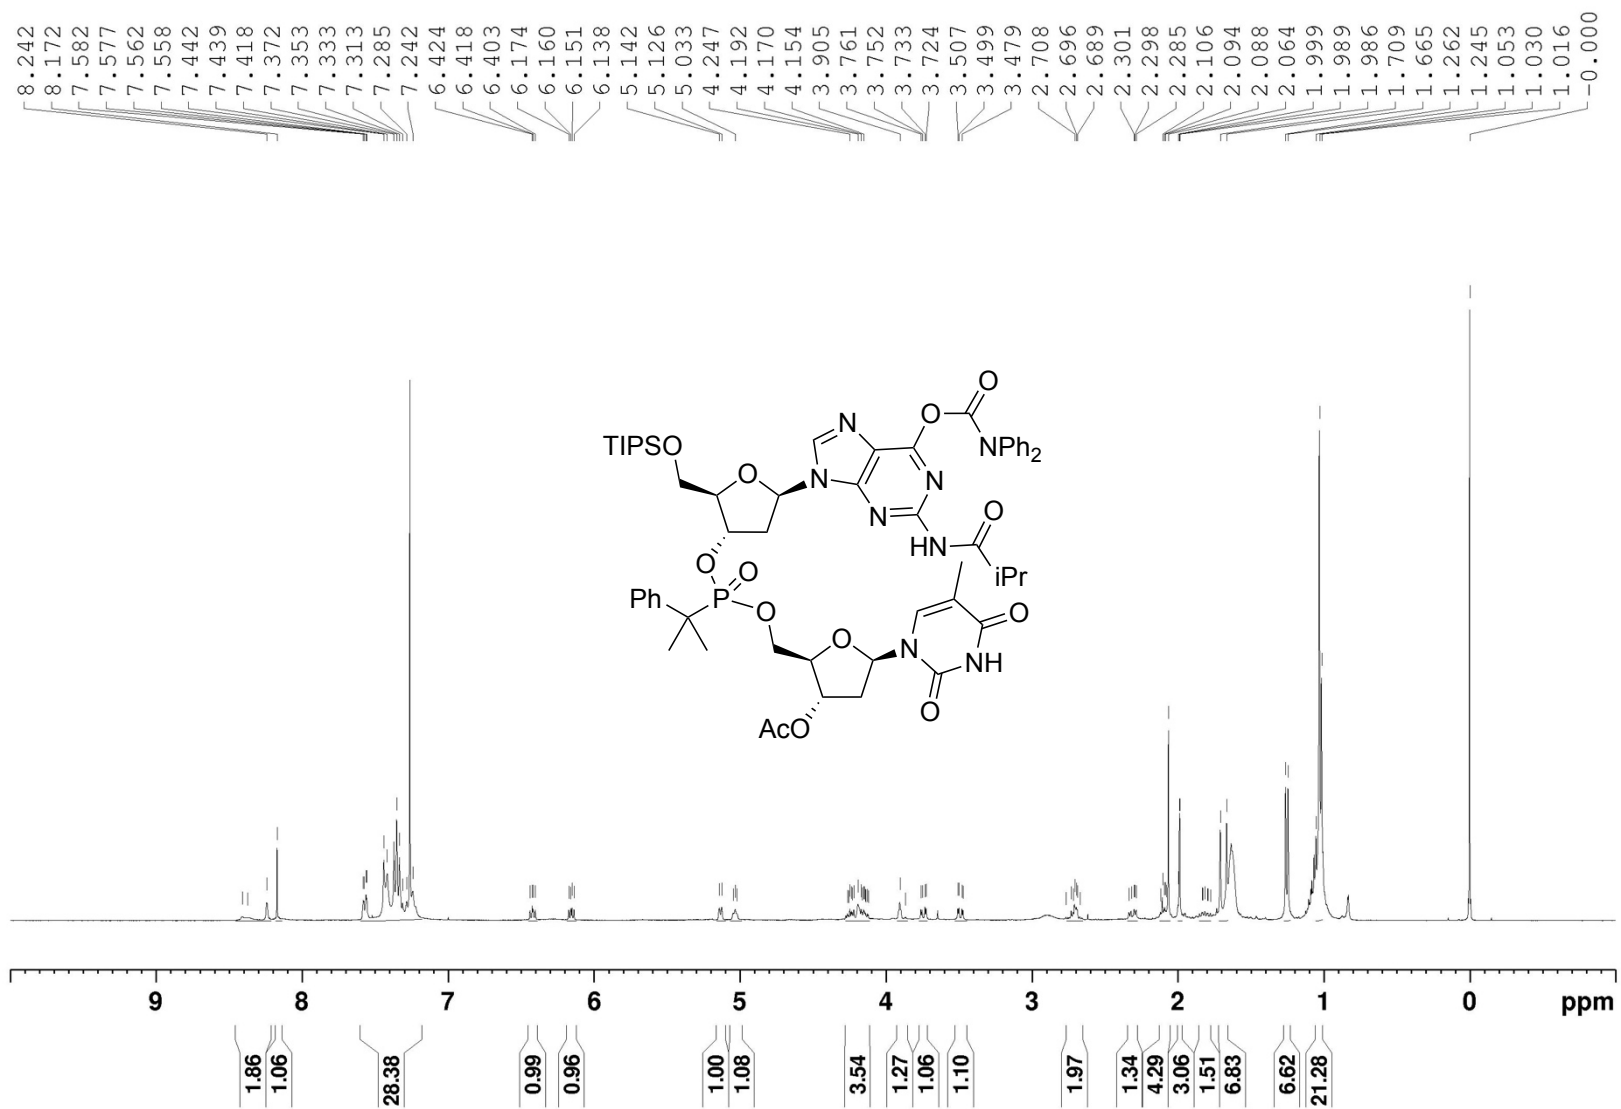

<sup>1</sup>H NMR (400 MHz, CDCl<sub>3</sub>) spectrum of **3fa-d2**

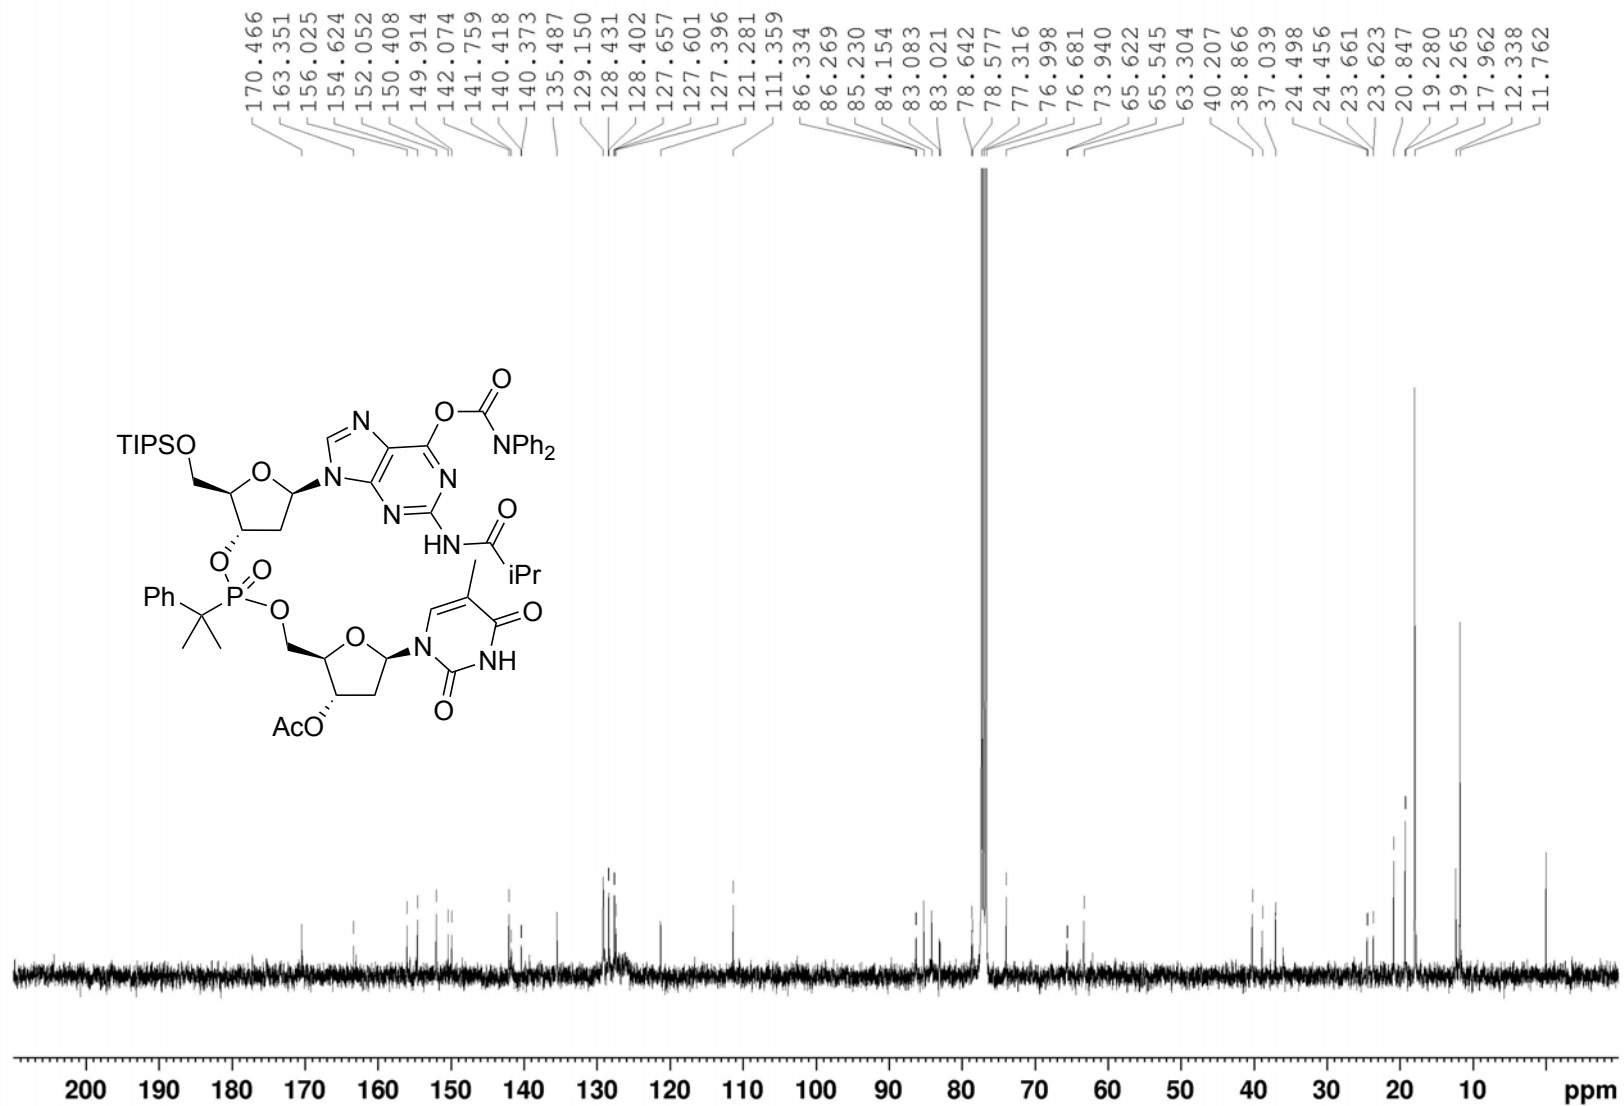

<sup>13</sup>C NMR (100.6 MHz, CDCl<sub>3</sub>) spectrum of **3fa-d2**

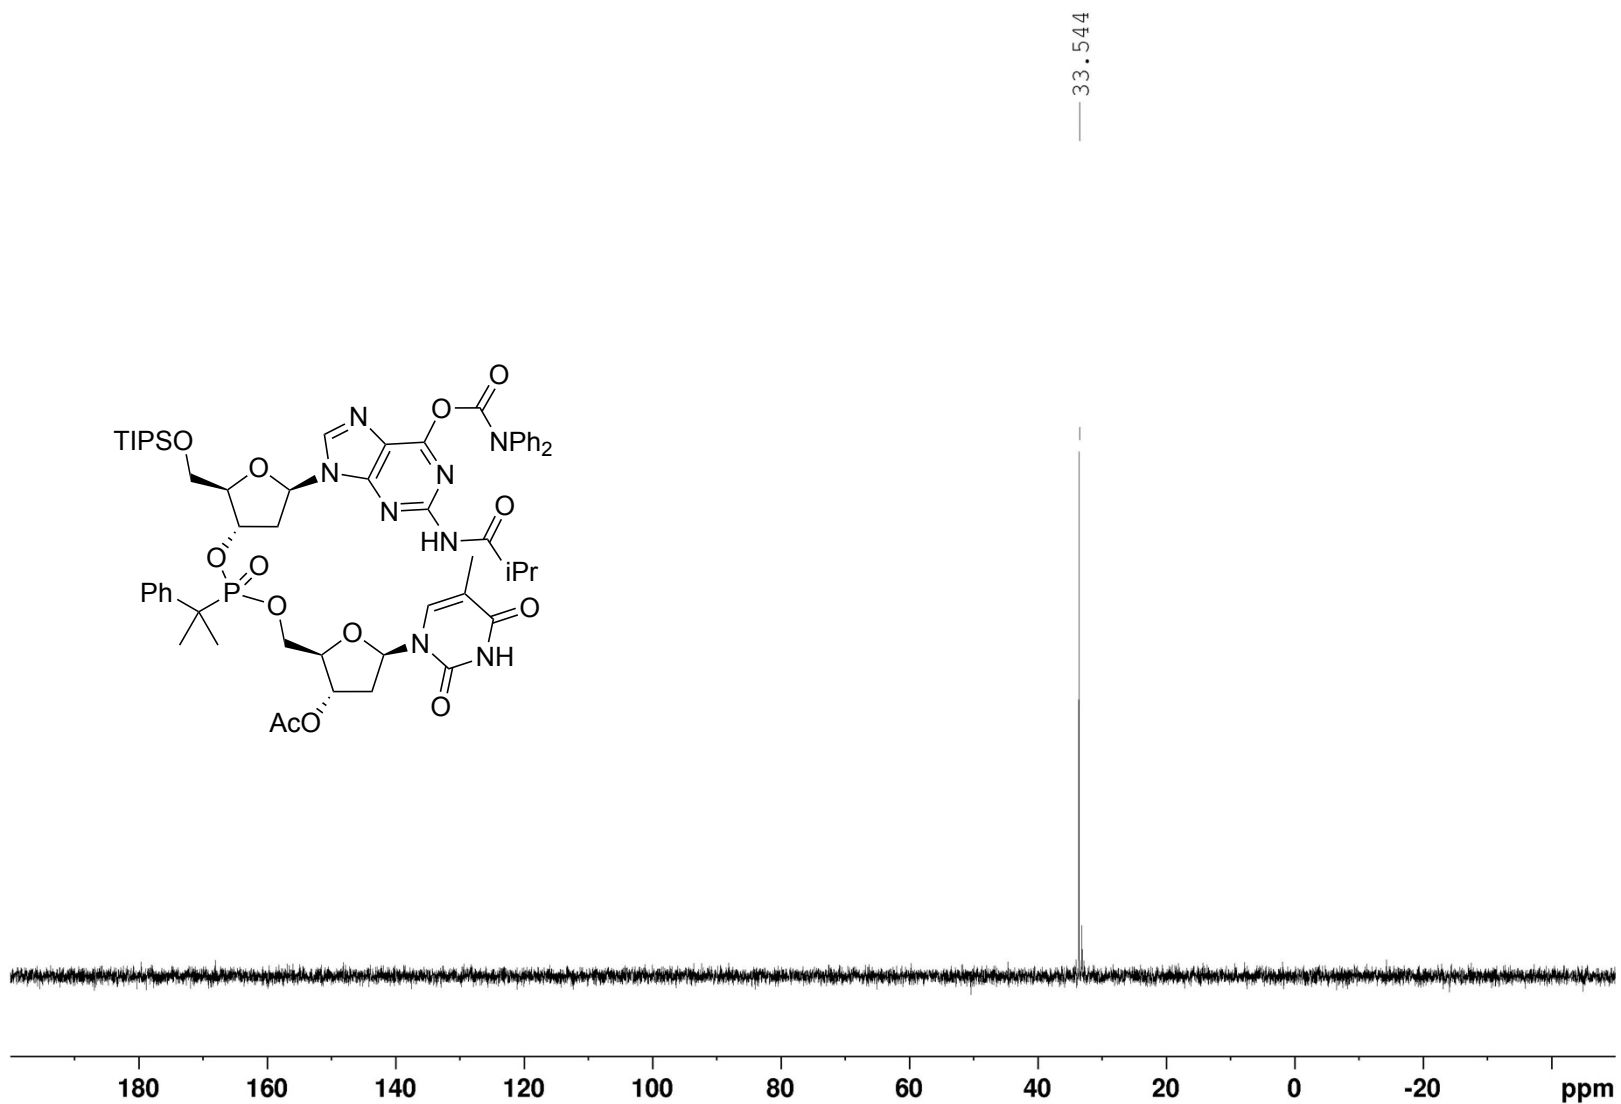

$^{31}\text{P}$  NMR (162 MHz,  $\text{CDCl}_3$ ) spectrum of **3fa-d2**

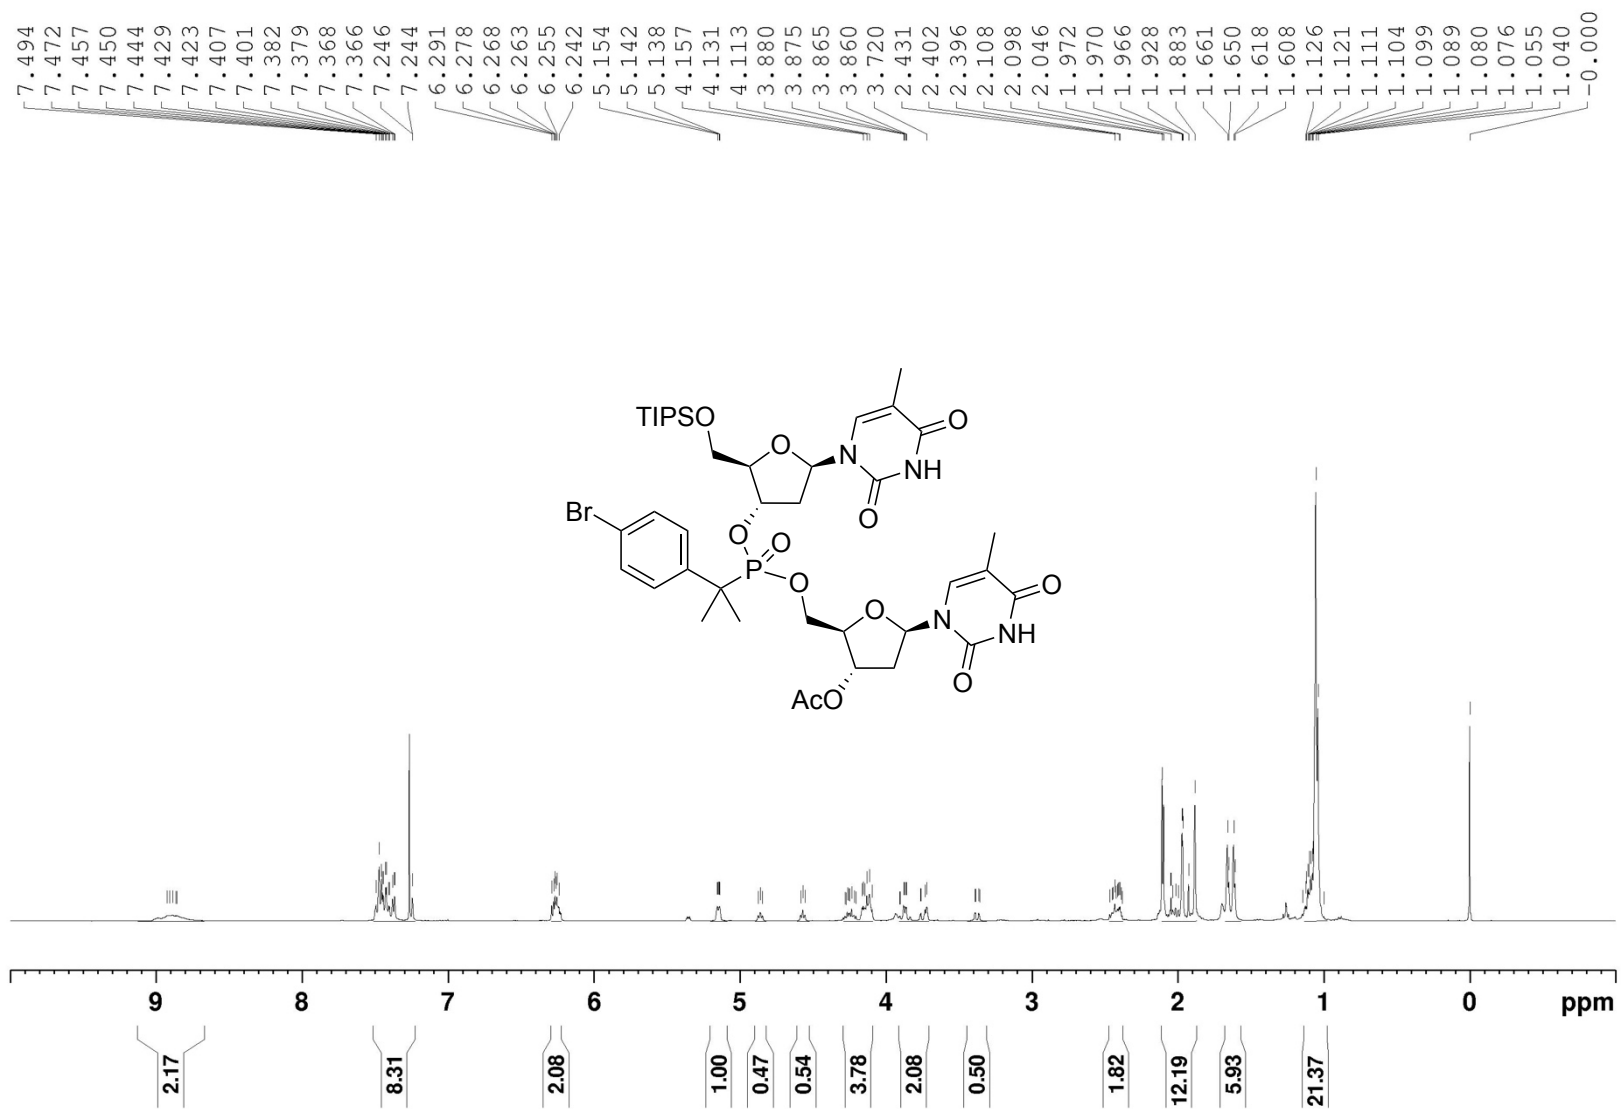

<sup>1</sup>H NMR (400 MHz, CDCl<sub>3</sub>) spectrum of **3ab**

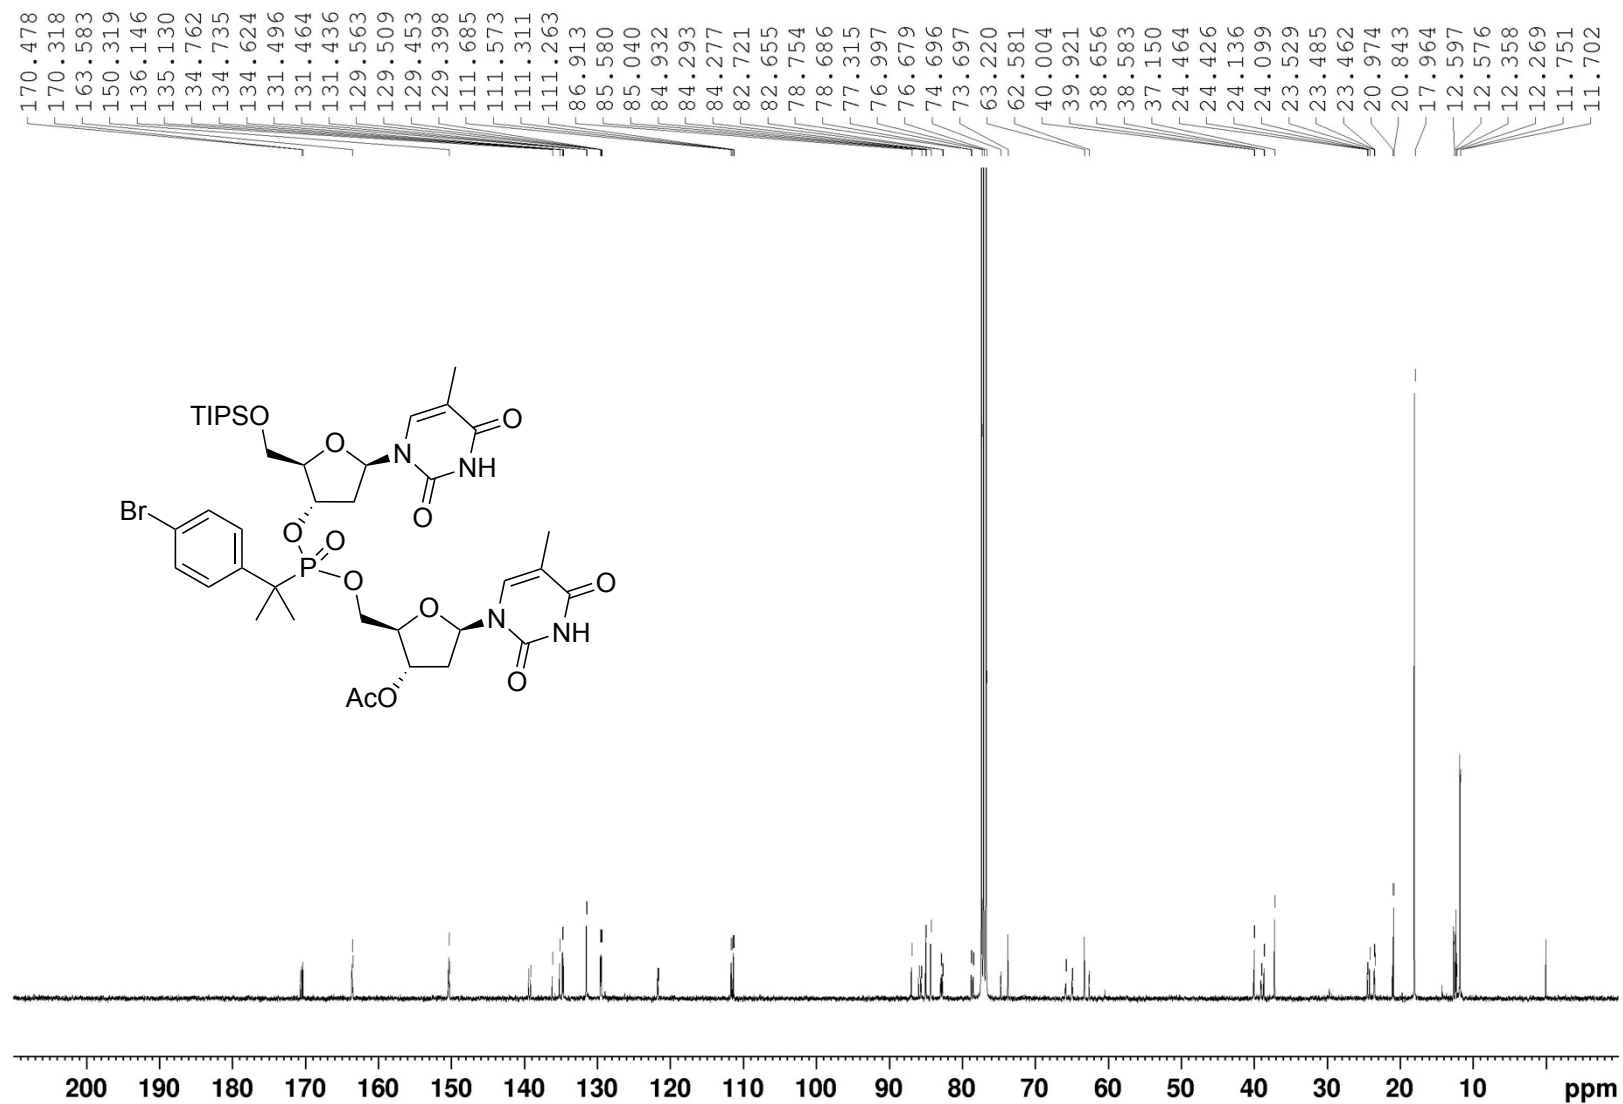

<sup>13</sup>C NMR (100.6 MHz, CDCl<sub>3</sub>) spectrum of **3ab**

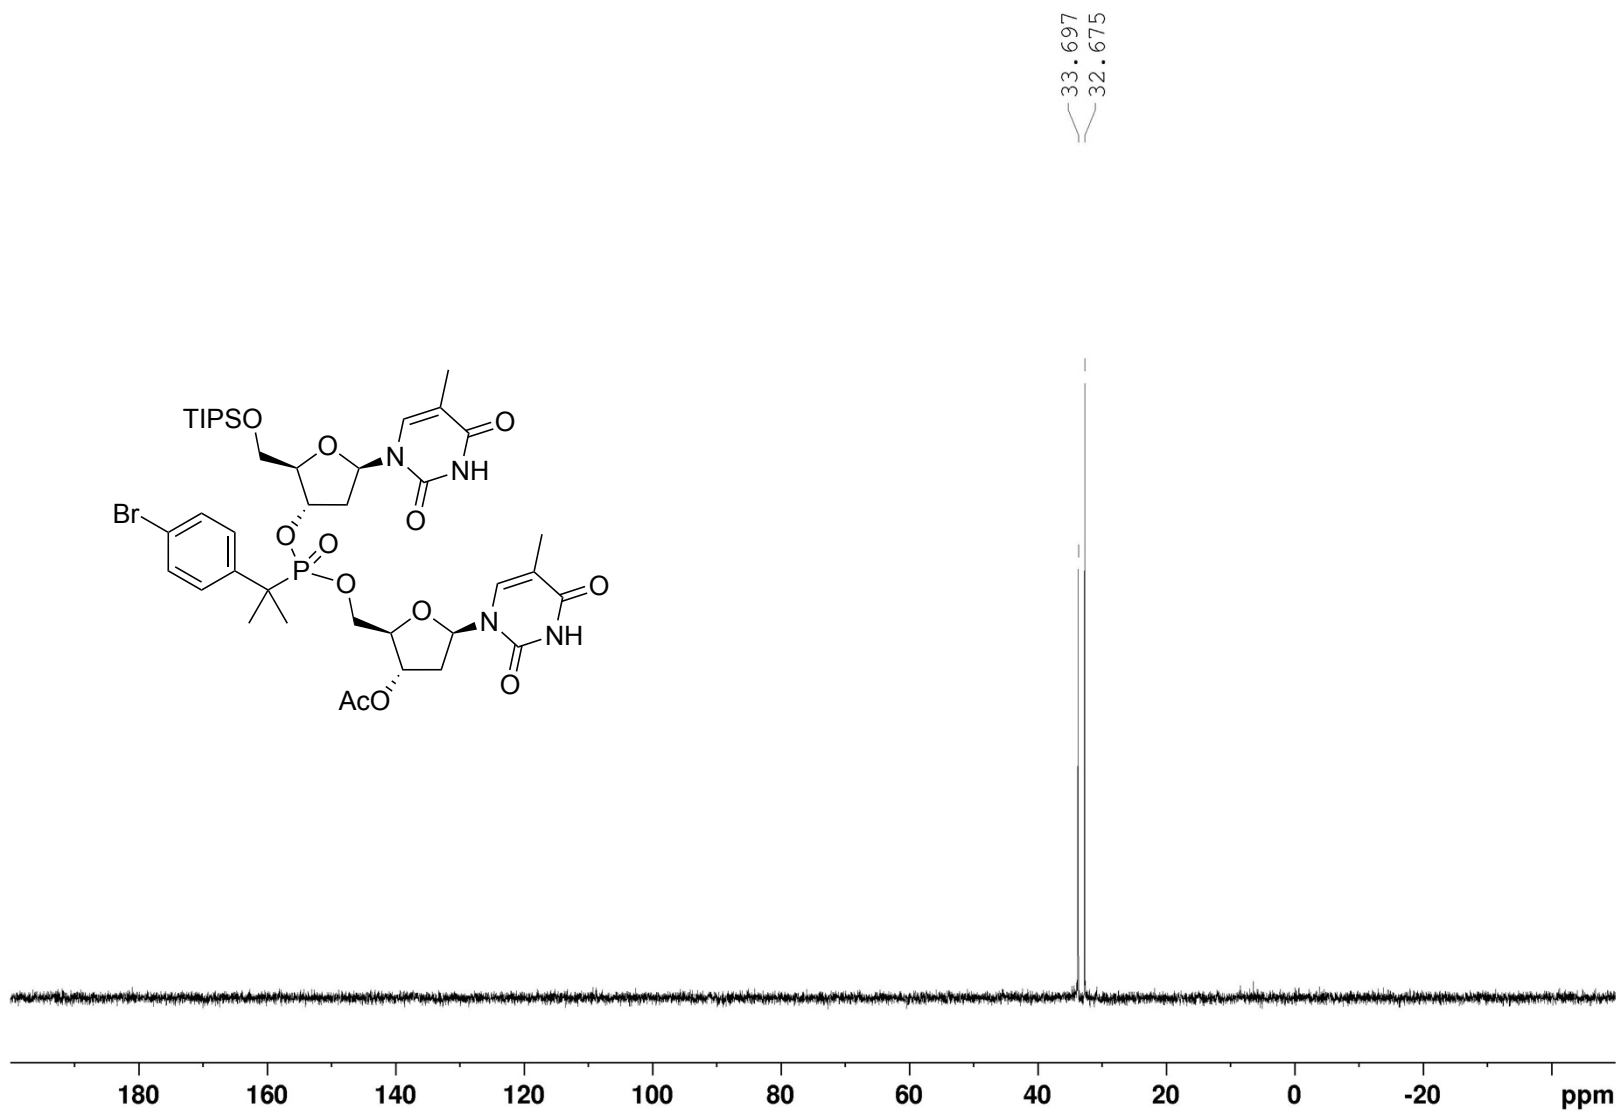

$^{31}\text{P}$  NMR (162 MHz,  $\text{CDCl}_3$ ) spectrum of **3ab**



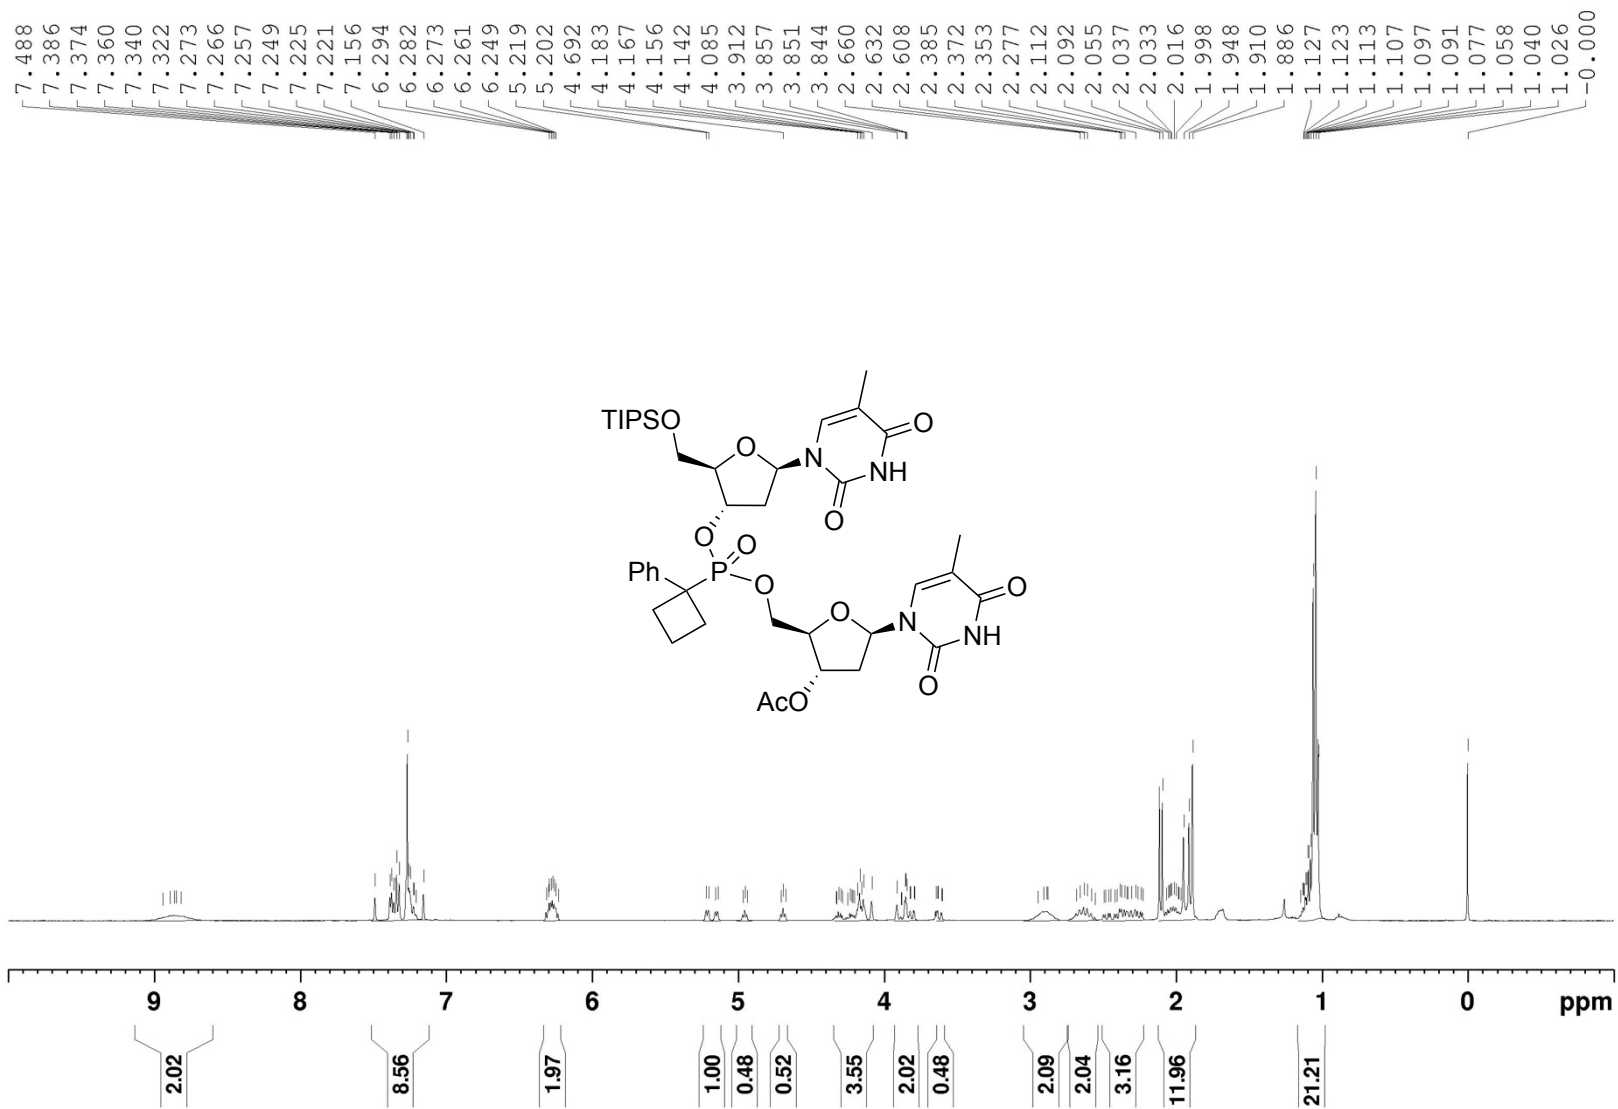

<sup>1</sup>H NMR (400 MHz, CDCl<sub>3</sub>) spectrum of **3ac**

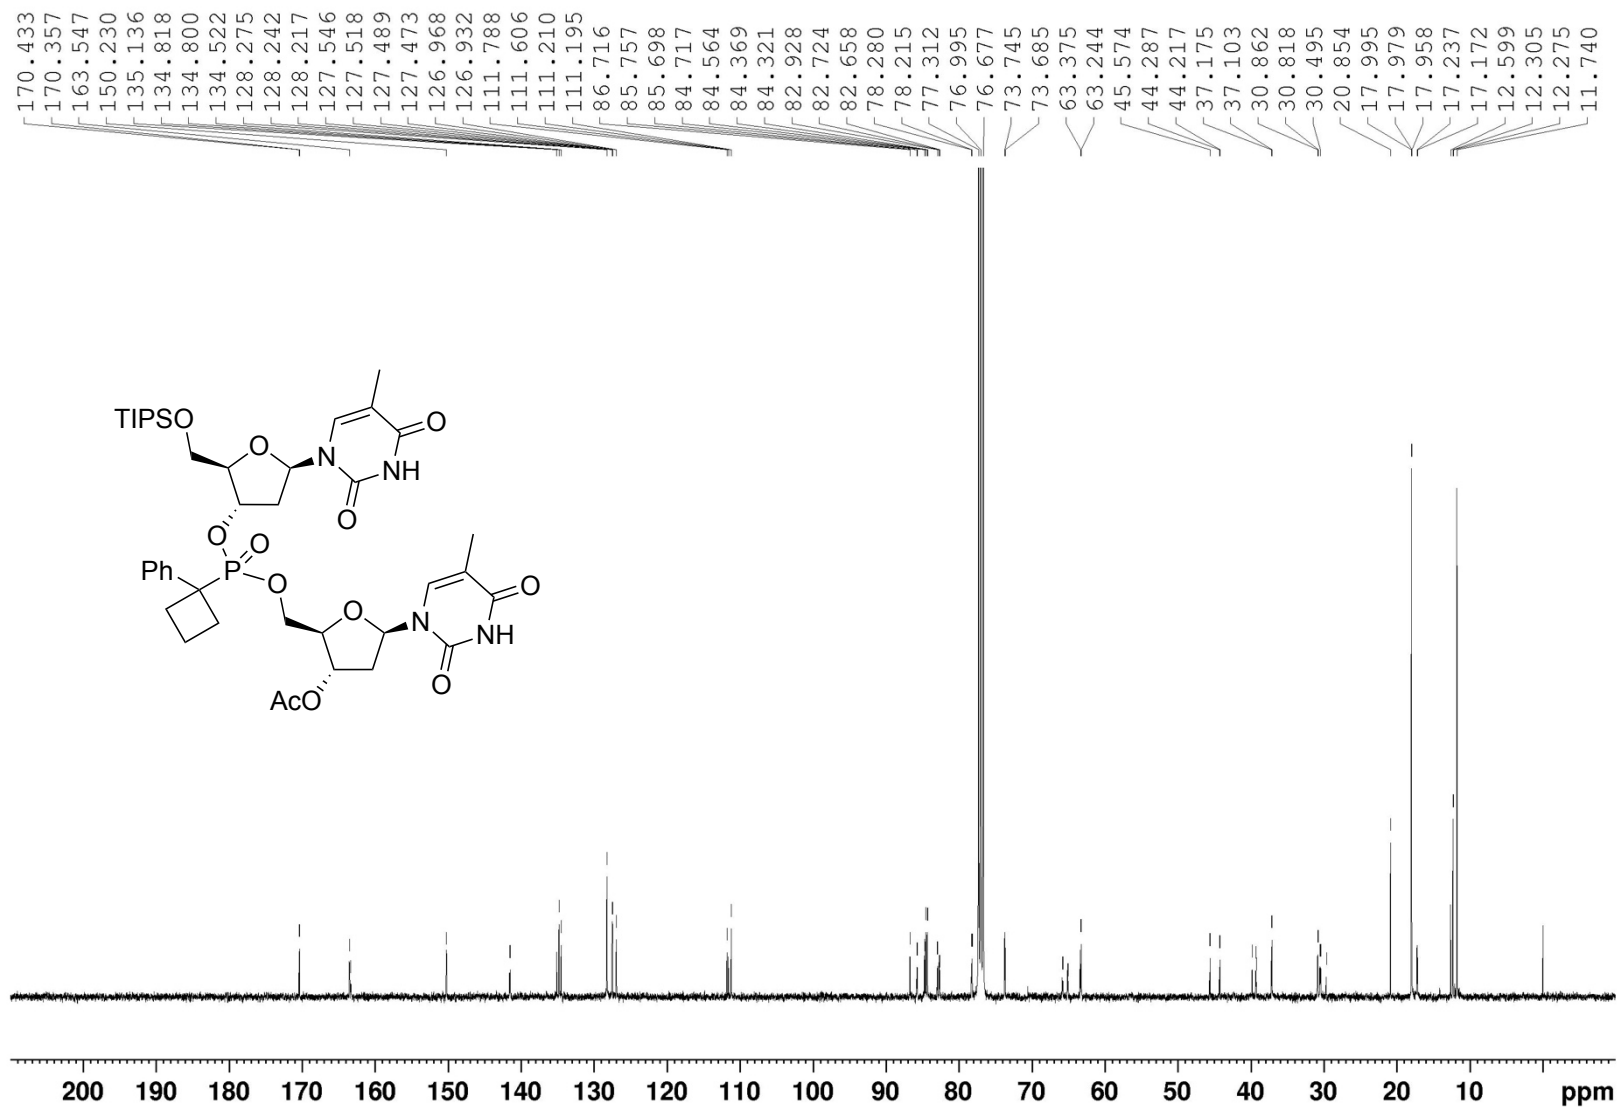

<sup>13</sup>C NMR (100.6 MHz, CDCl<sub>3</sub>) spectrum of **3ac**

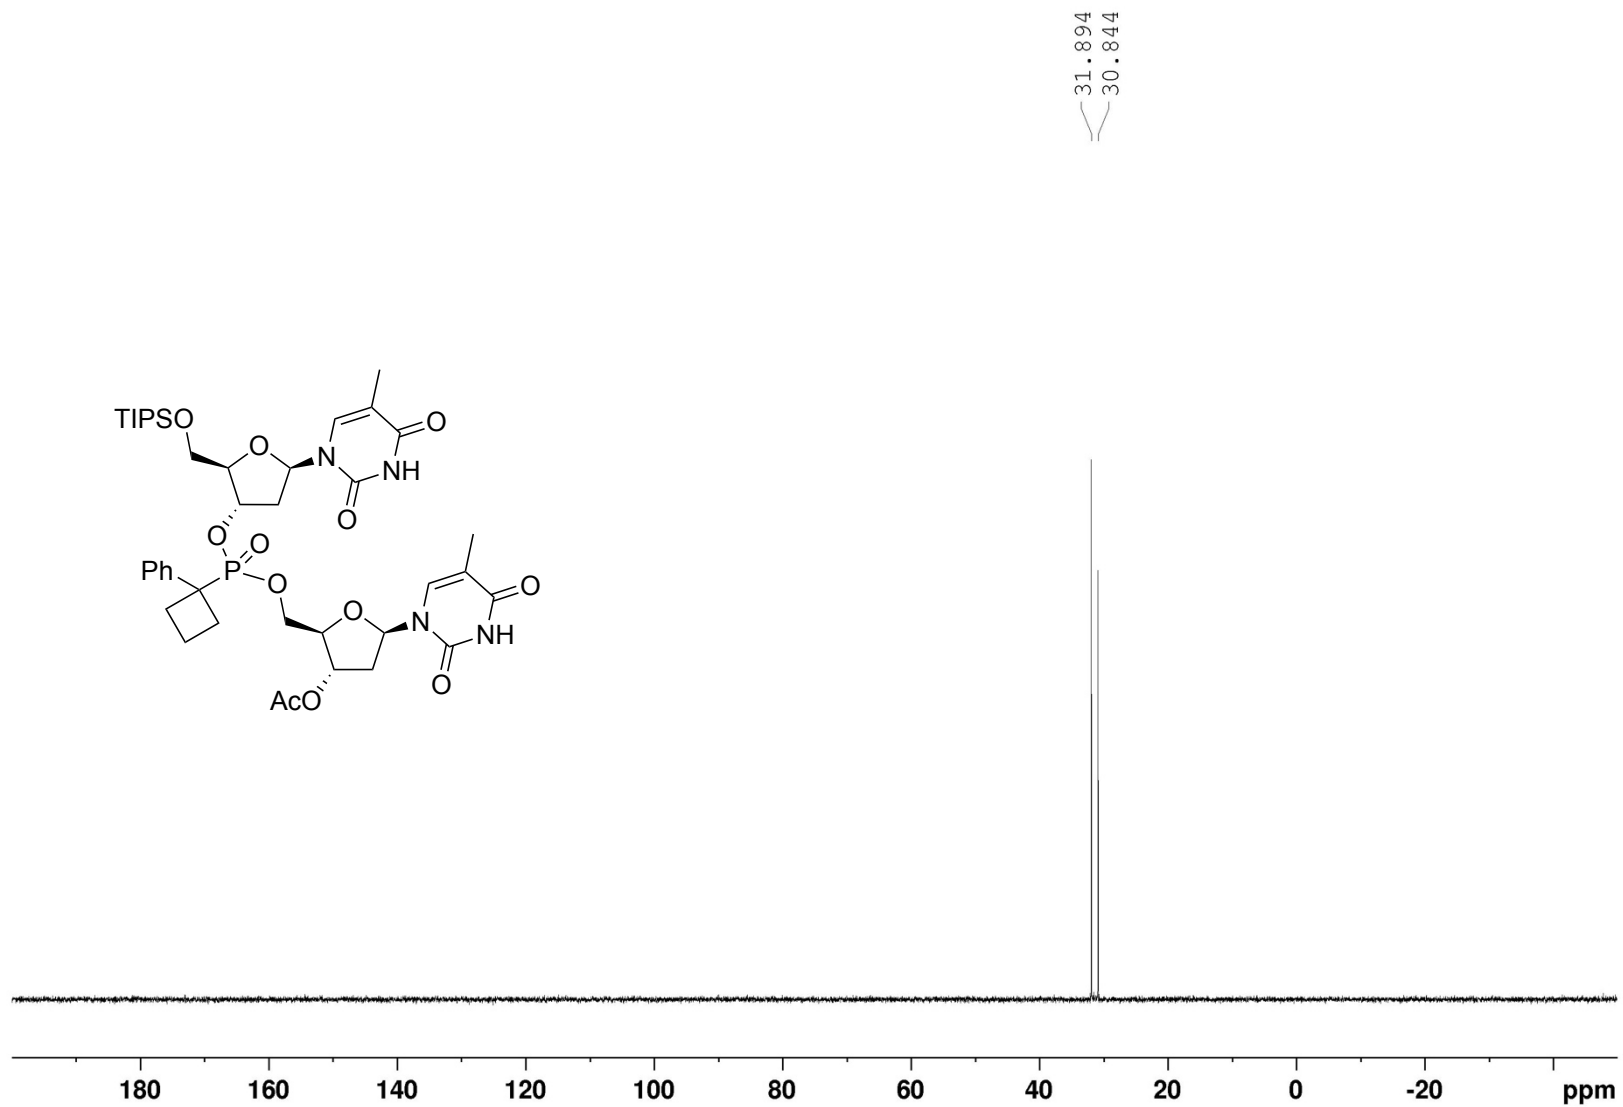

$^{31}\text{P}$  NMR (162 MHz,  $\text{CDCl}_3$ ) spectrum of **3ac**

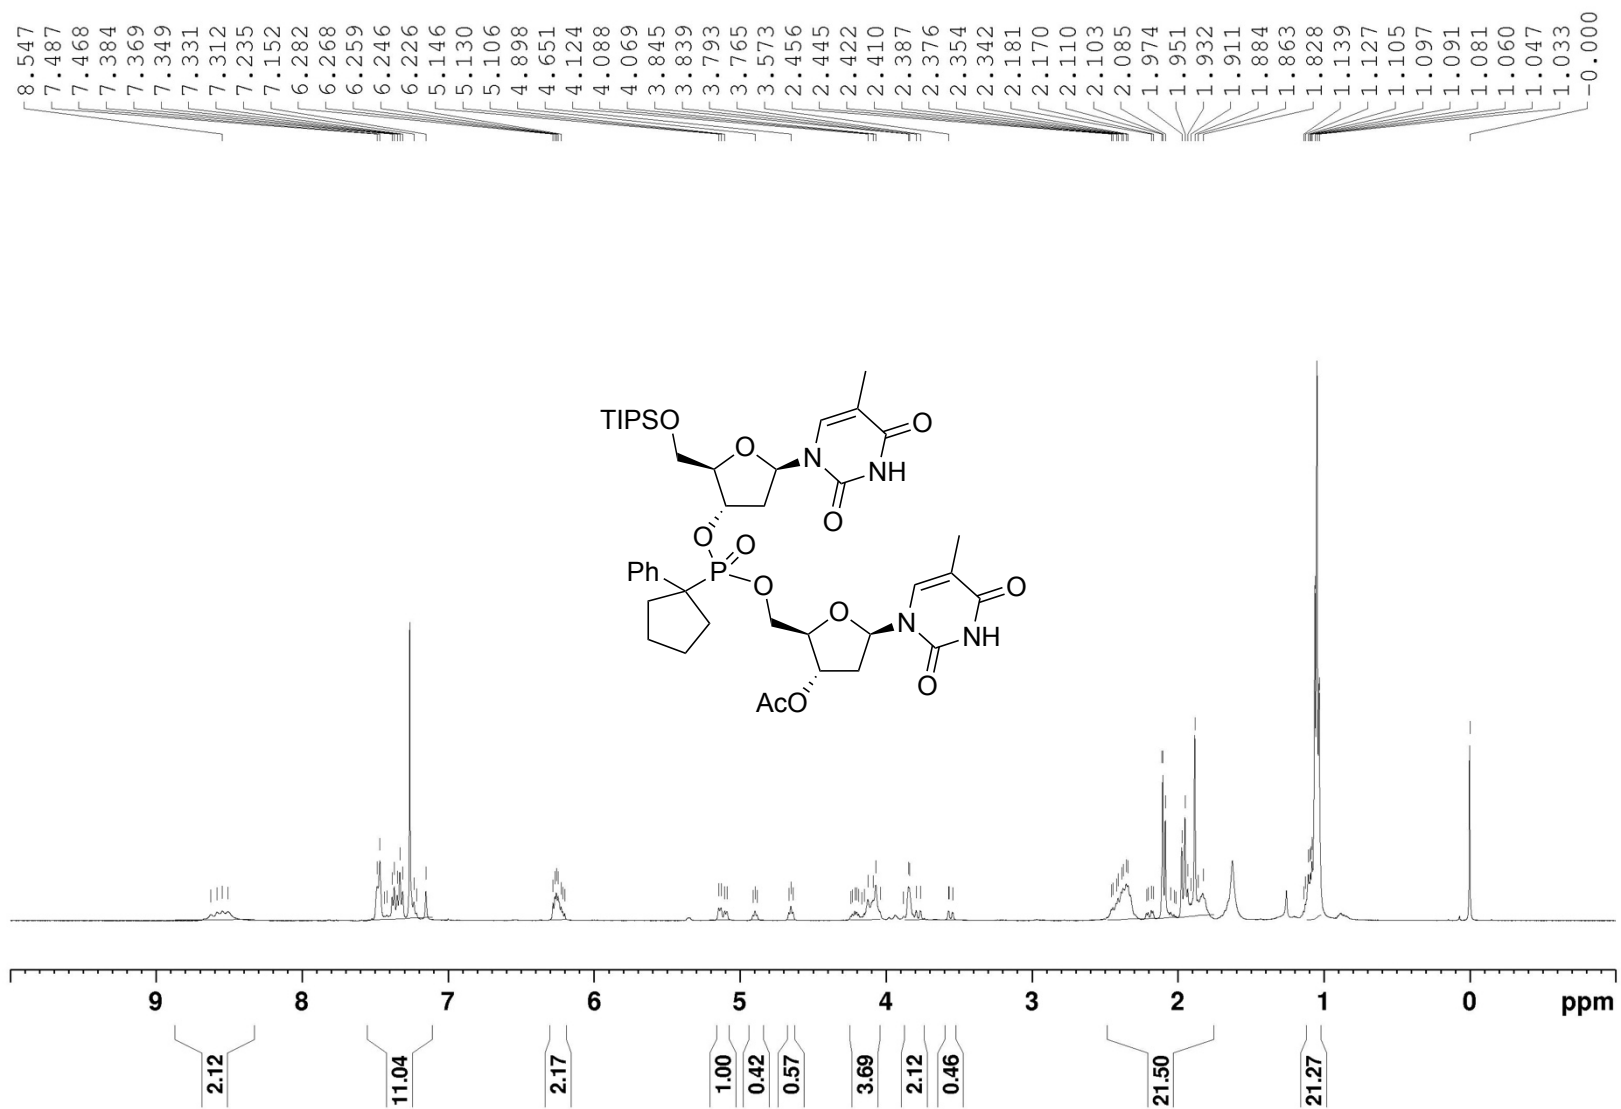

<sup>1</sup>H NMR (400 MHz, CDCl<sub>3</sub>) spectrum of **3ad**

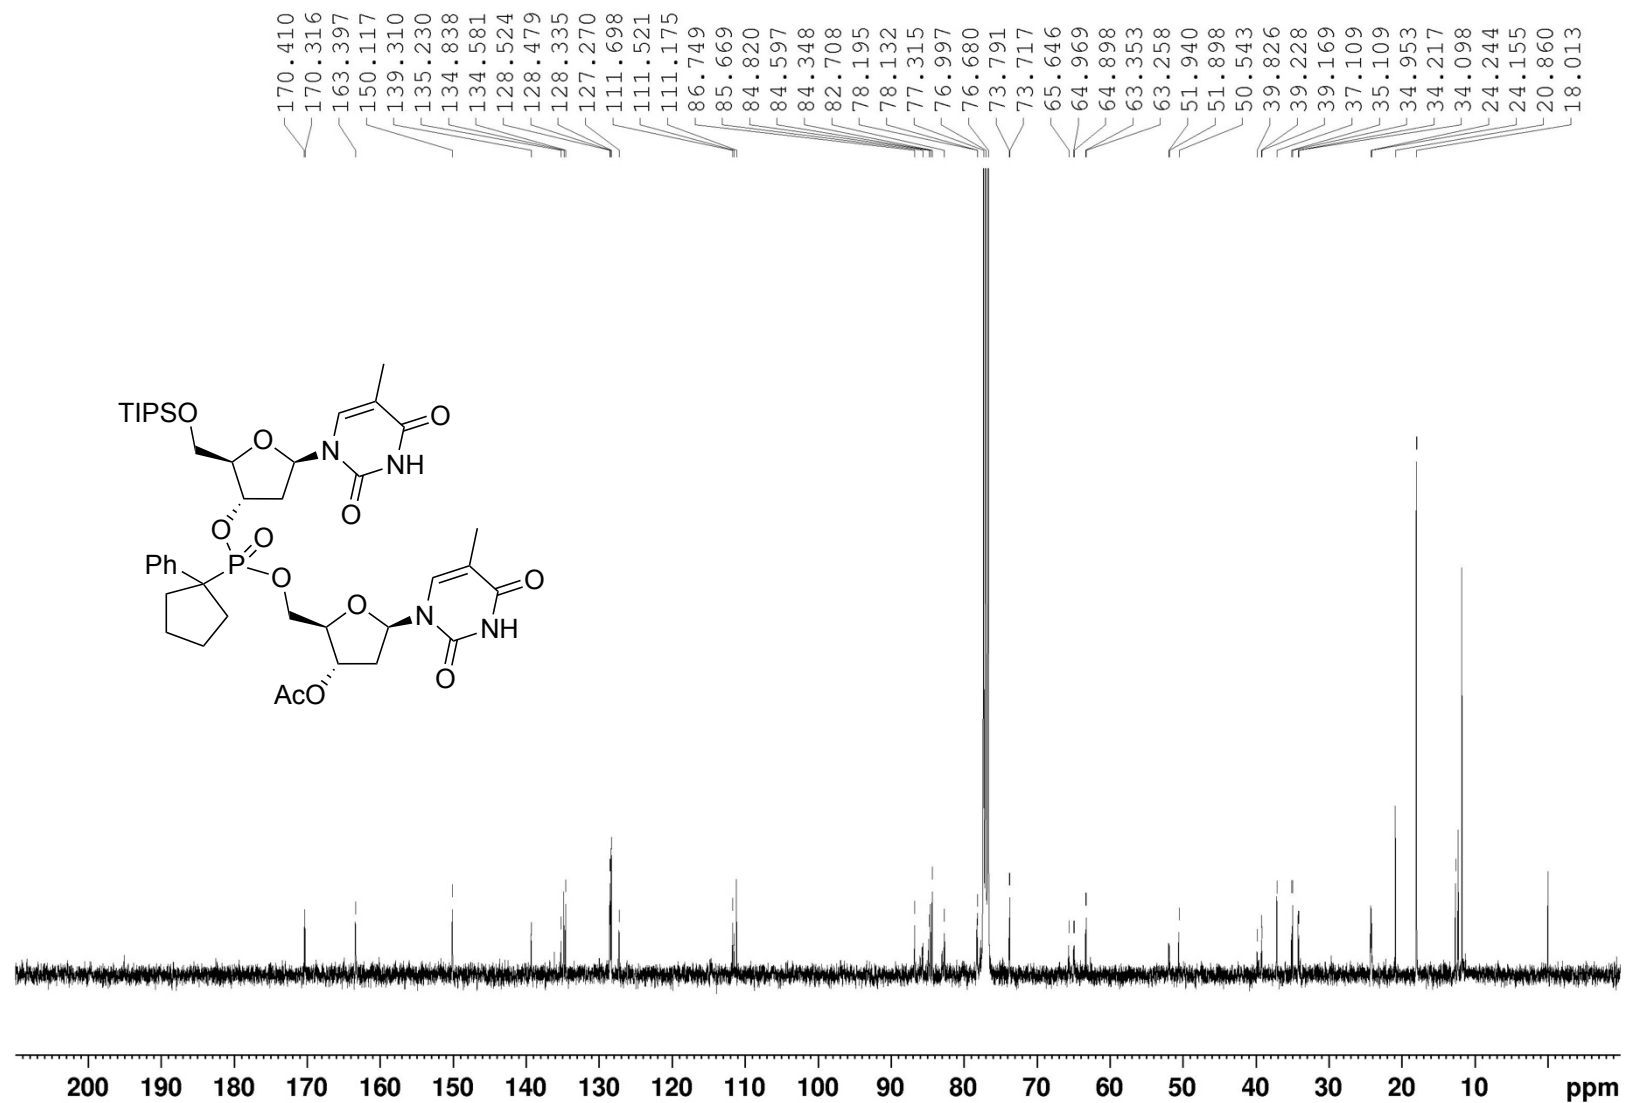

<sup>13</sup>C NMR (100.6 MHz, CDCl<sub>3</sub>) spectrum of **3ad**

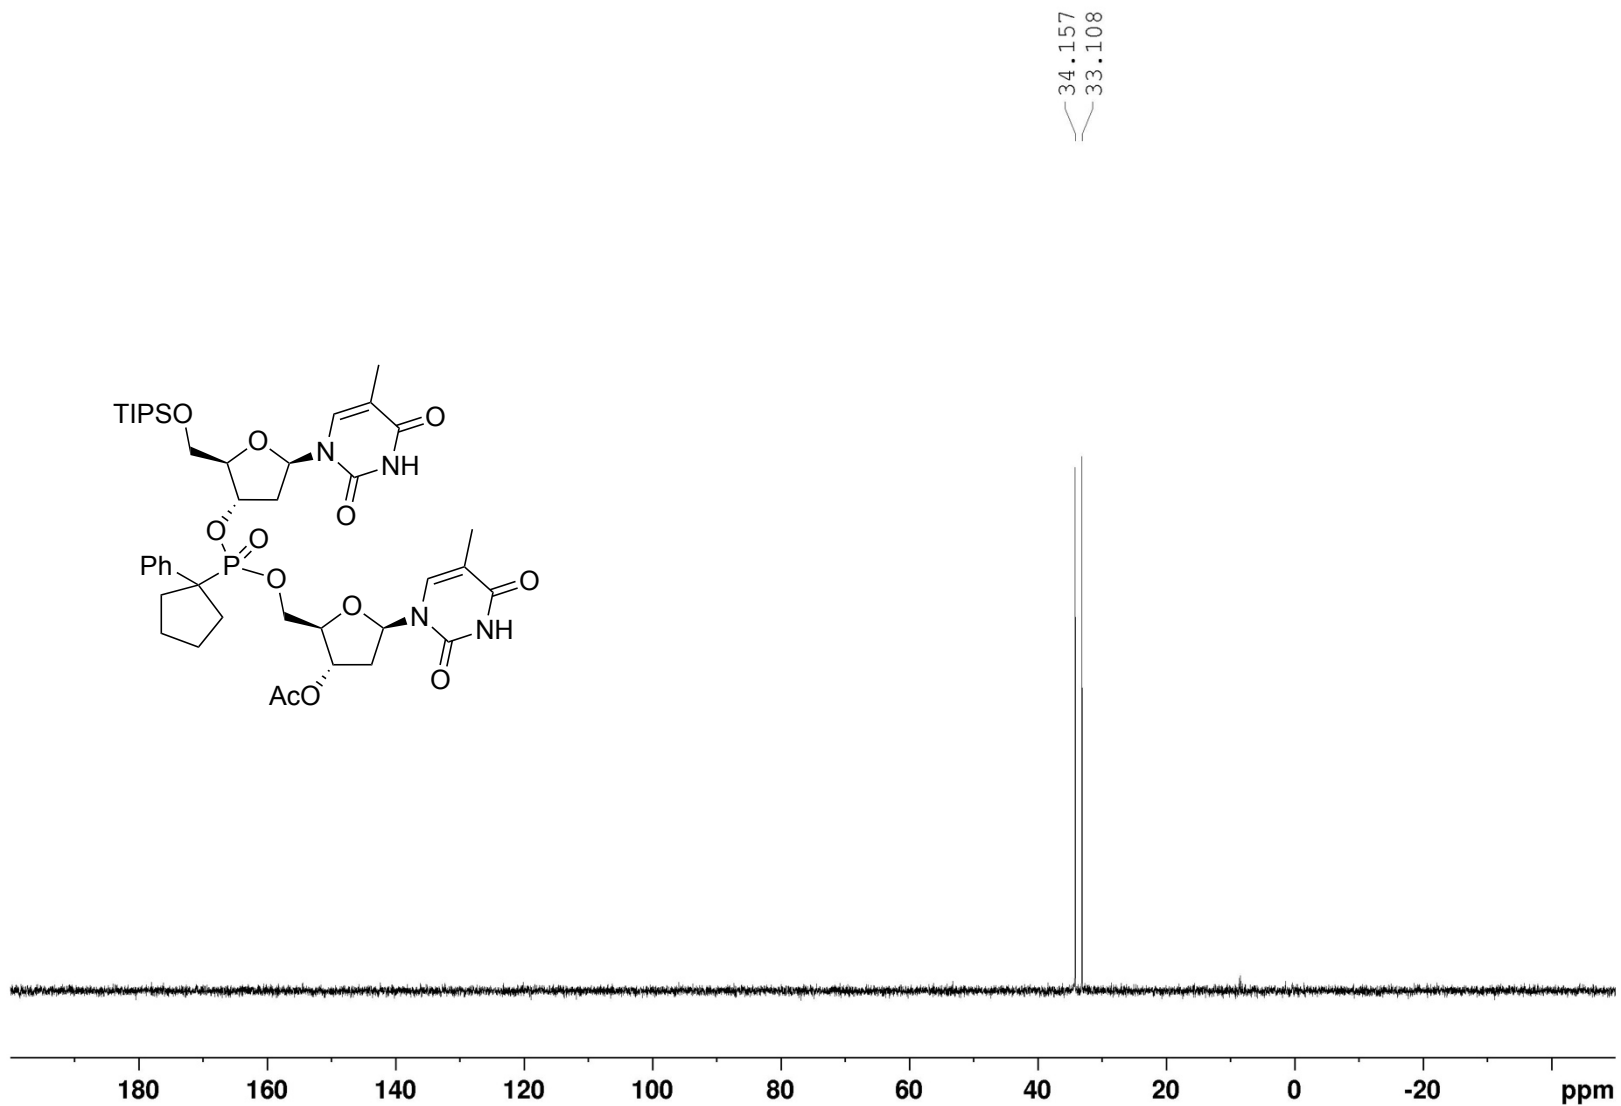

$^{31}\text{P}$  NMR (162 MHz,  $\text{CDCl}_3$ ) spectrum of **3ad**

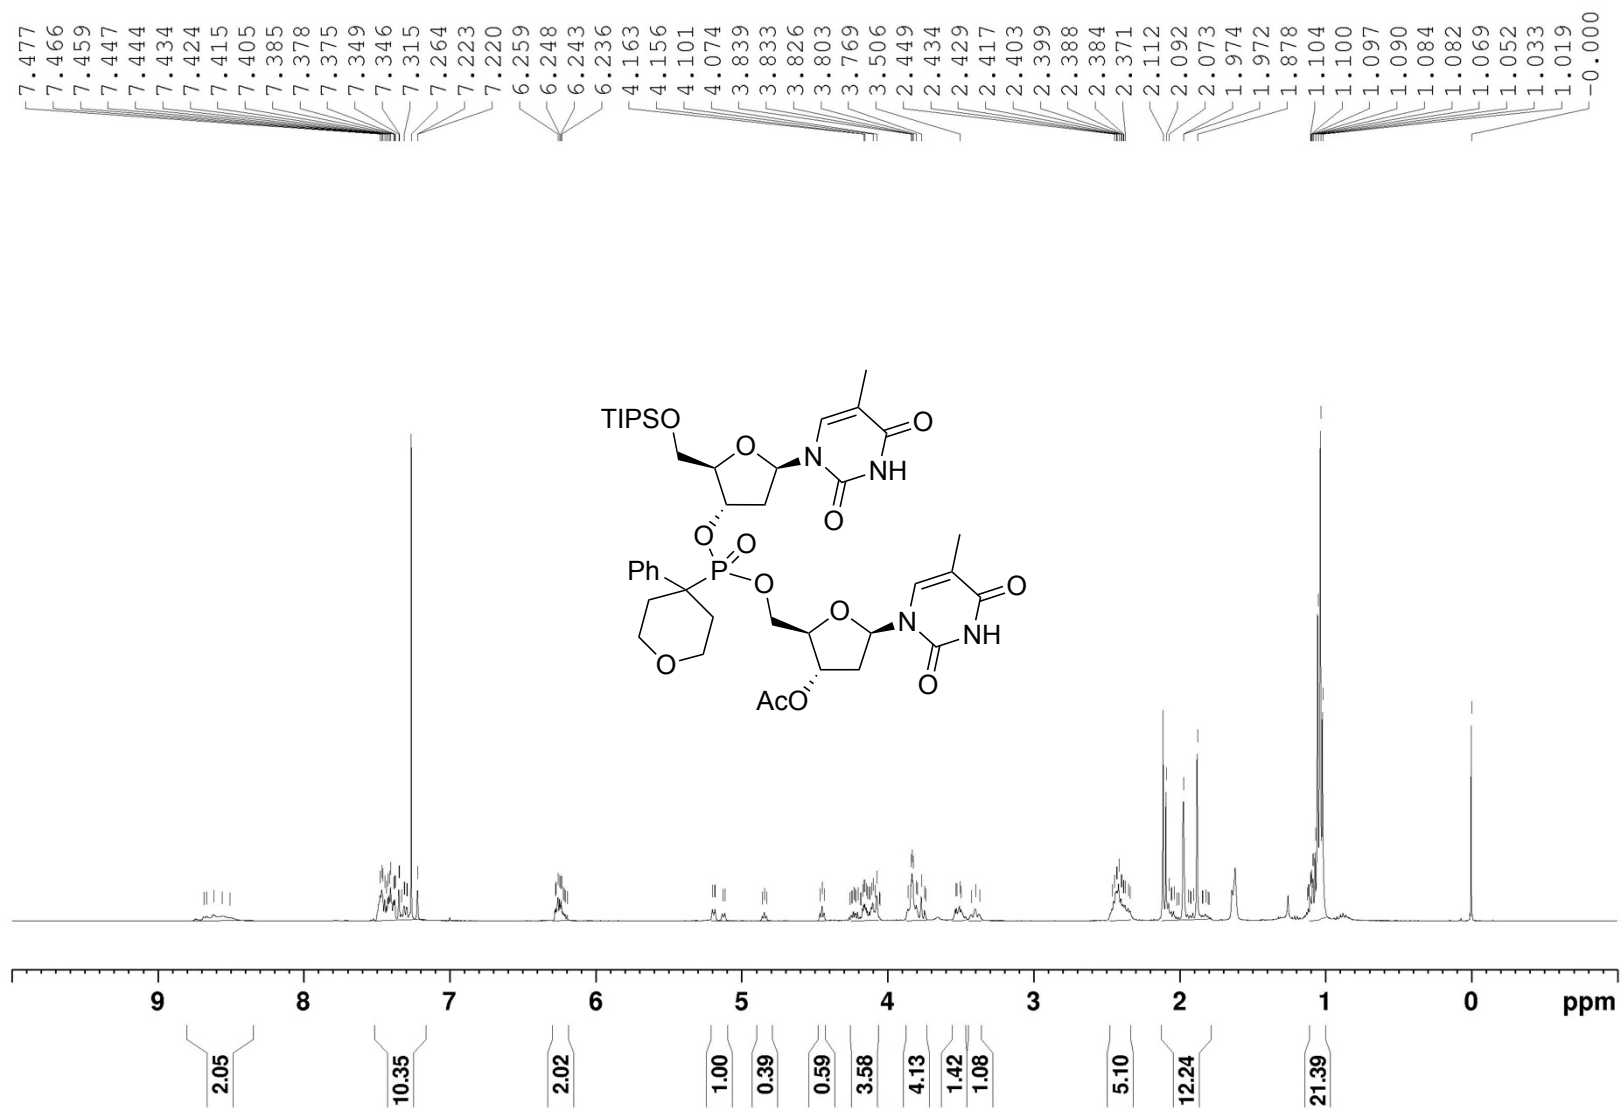

$^1\text{H}$  NMR (400 MHz,  $\text{CDCl}_3$ ) spectrum of **3ae**

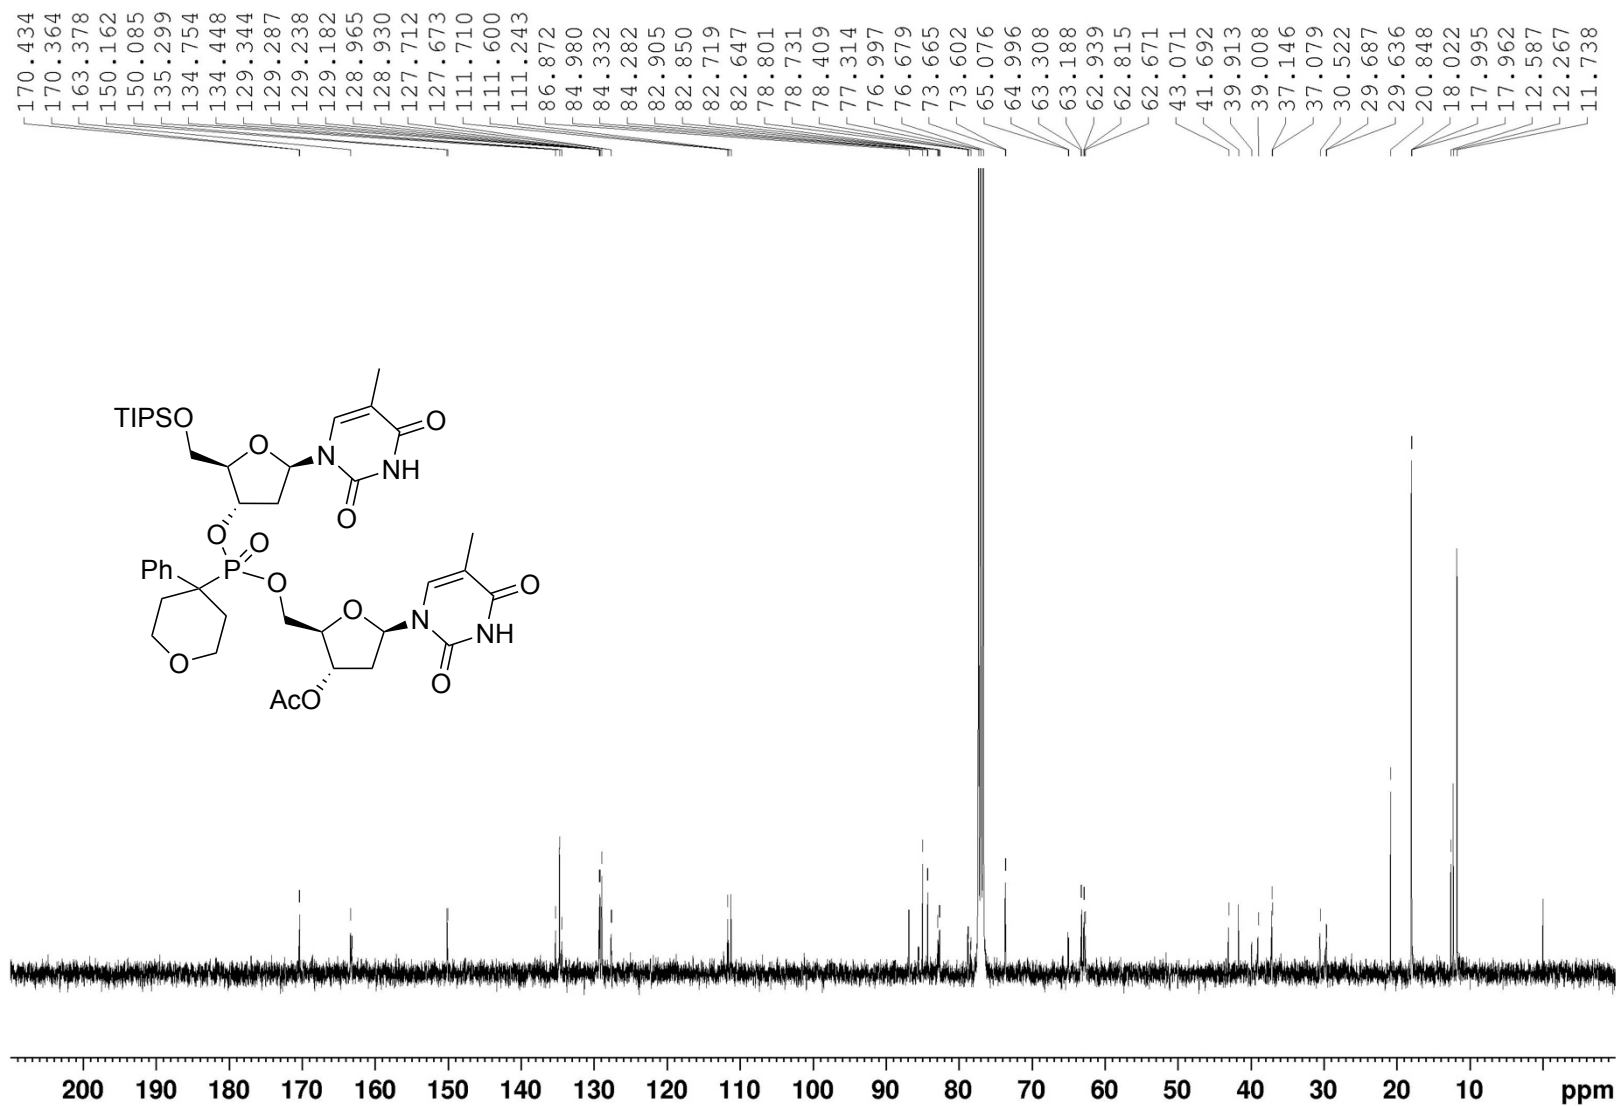

$^{13}\text{C}$  NMR (100.6 MHz,  $\text{CDCl}_3$ ) spectrum of **3ae**



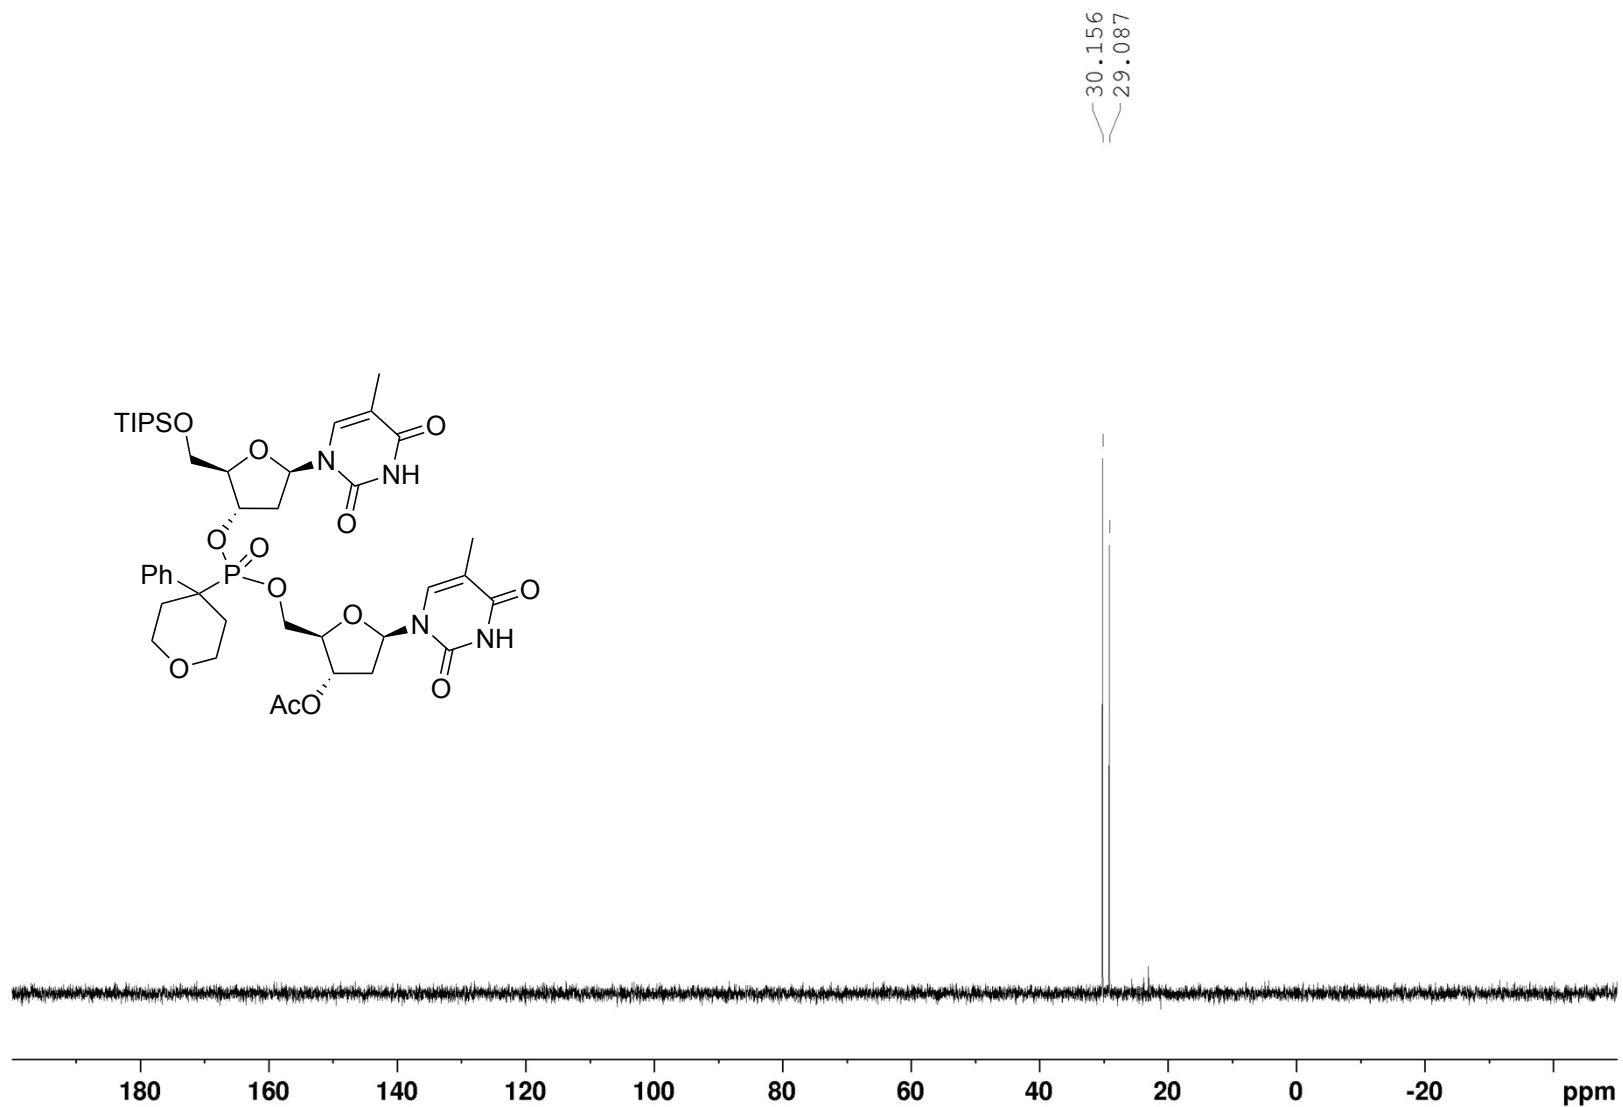

$^{31}\text{P}$  NMR (162 MHz,  $\text{CDCl}_3$ ) spectrum of **3ae**

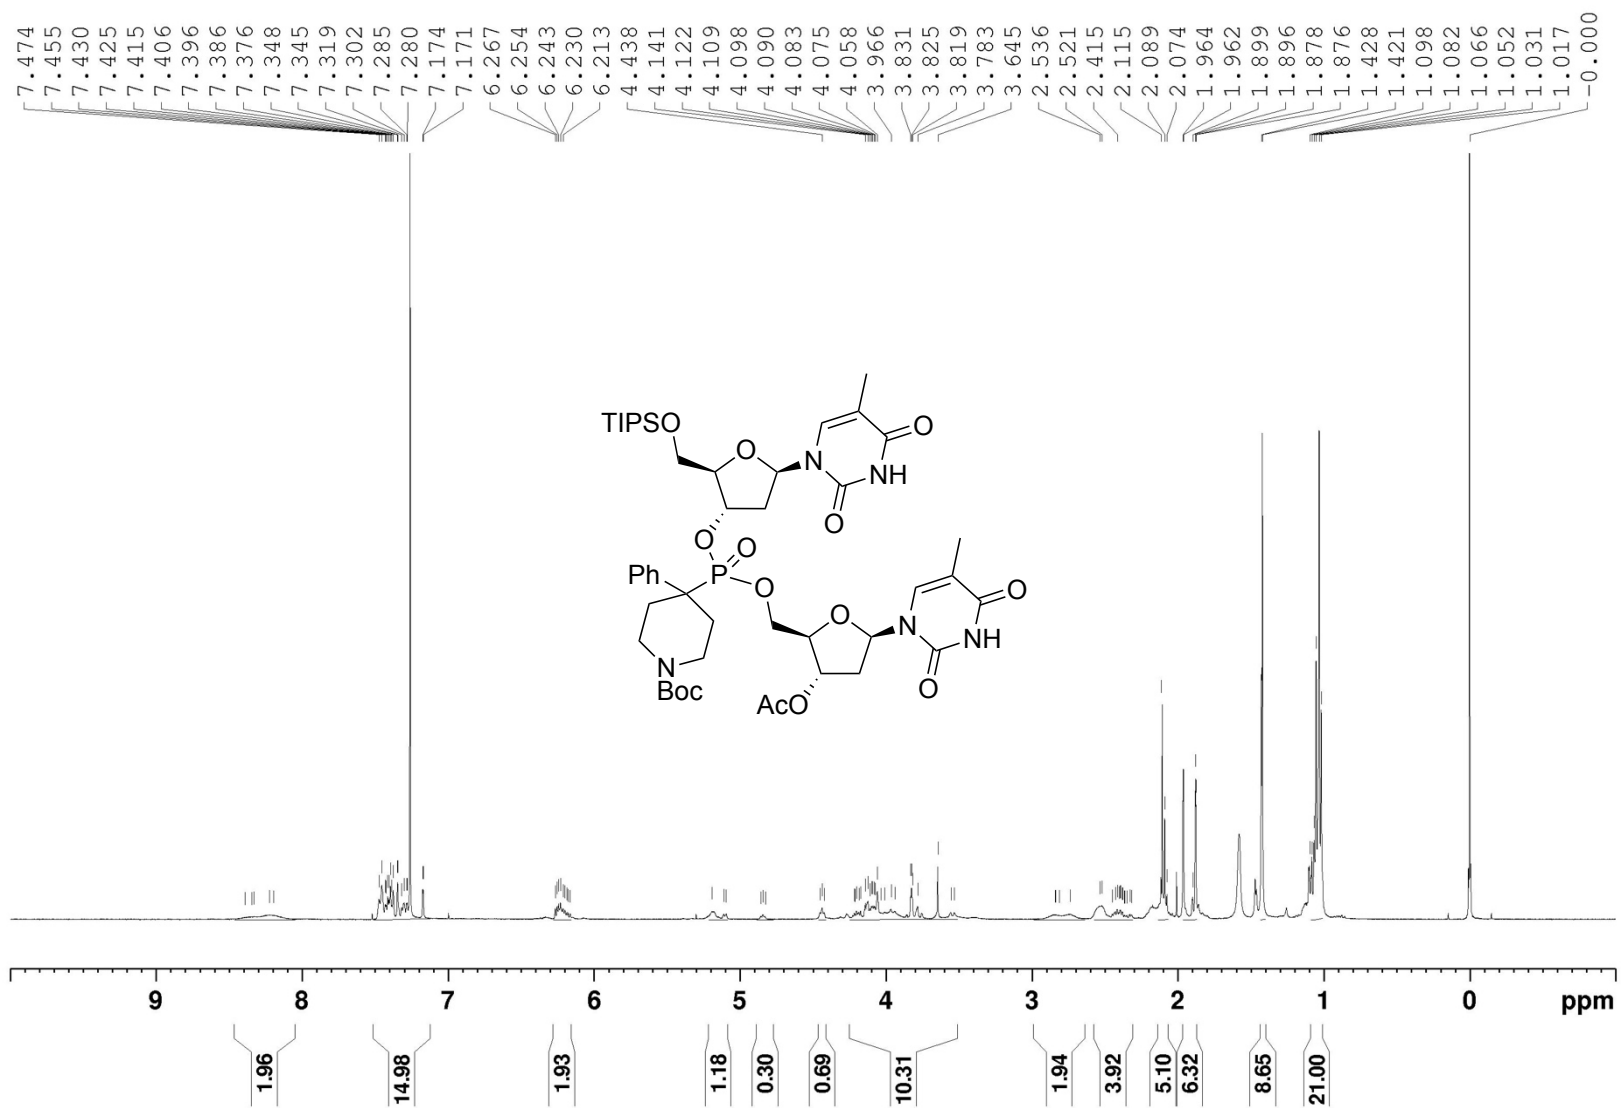

<sup>1</sup>H NMR (400 MHz, CDCl<sub>3</sub>) spectrum of **3af**

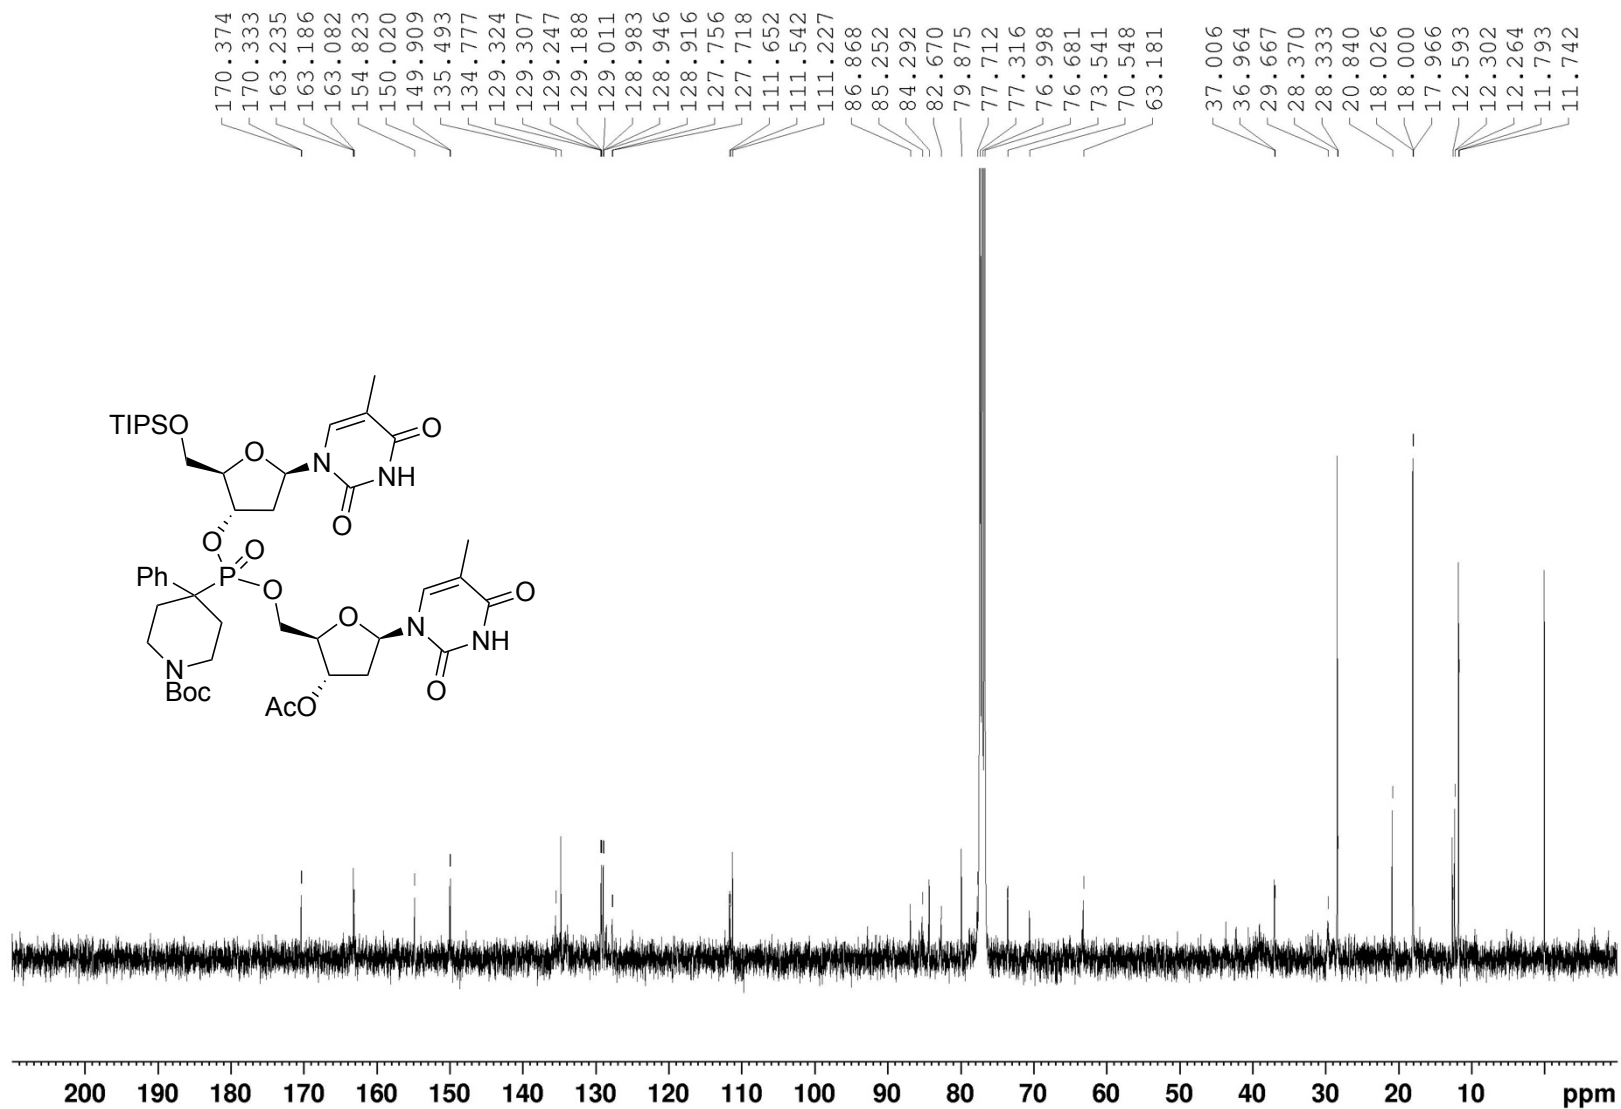

<sup>13</sup>C NMR (100.6 MHz, CDCl<sub>3</sub>) spectrum of **3af**

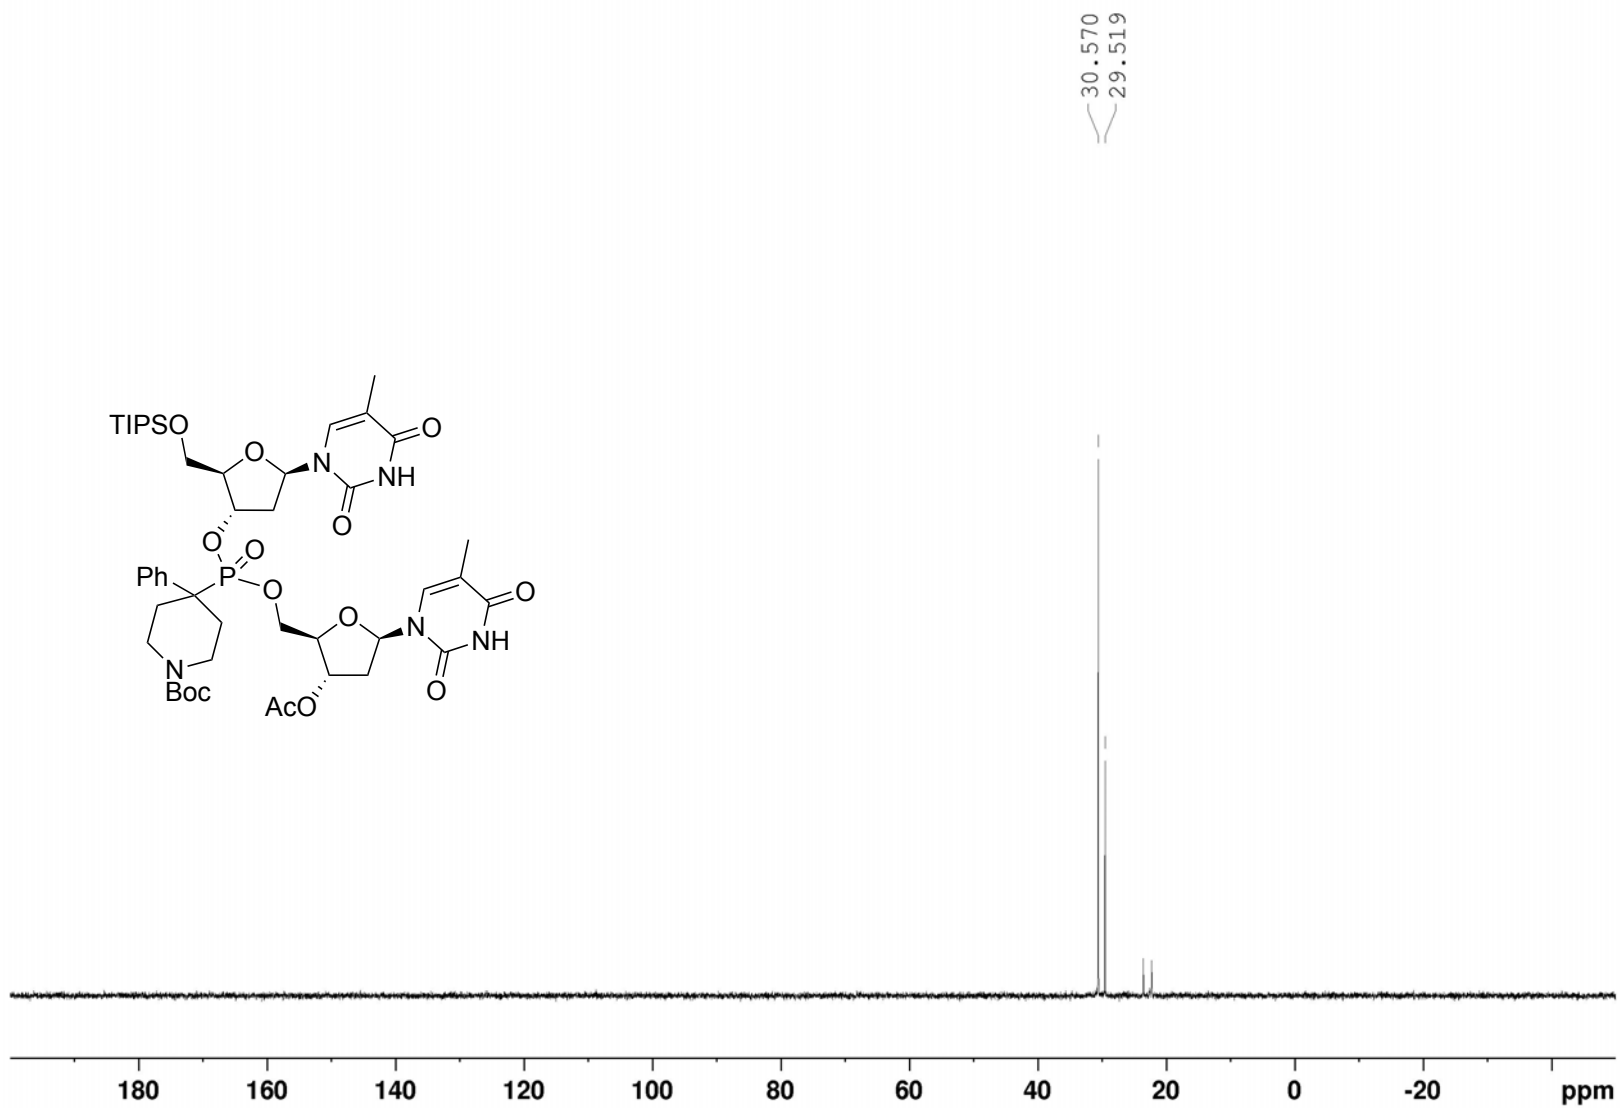

$^{31}\text{P}$  NMR (162 MHz,  $\text{CDCl}_3$ ) spectrum of **3af**

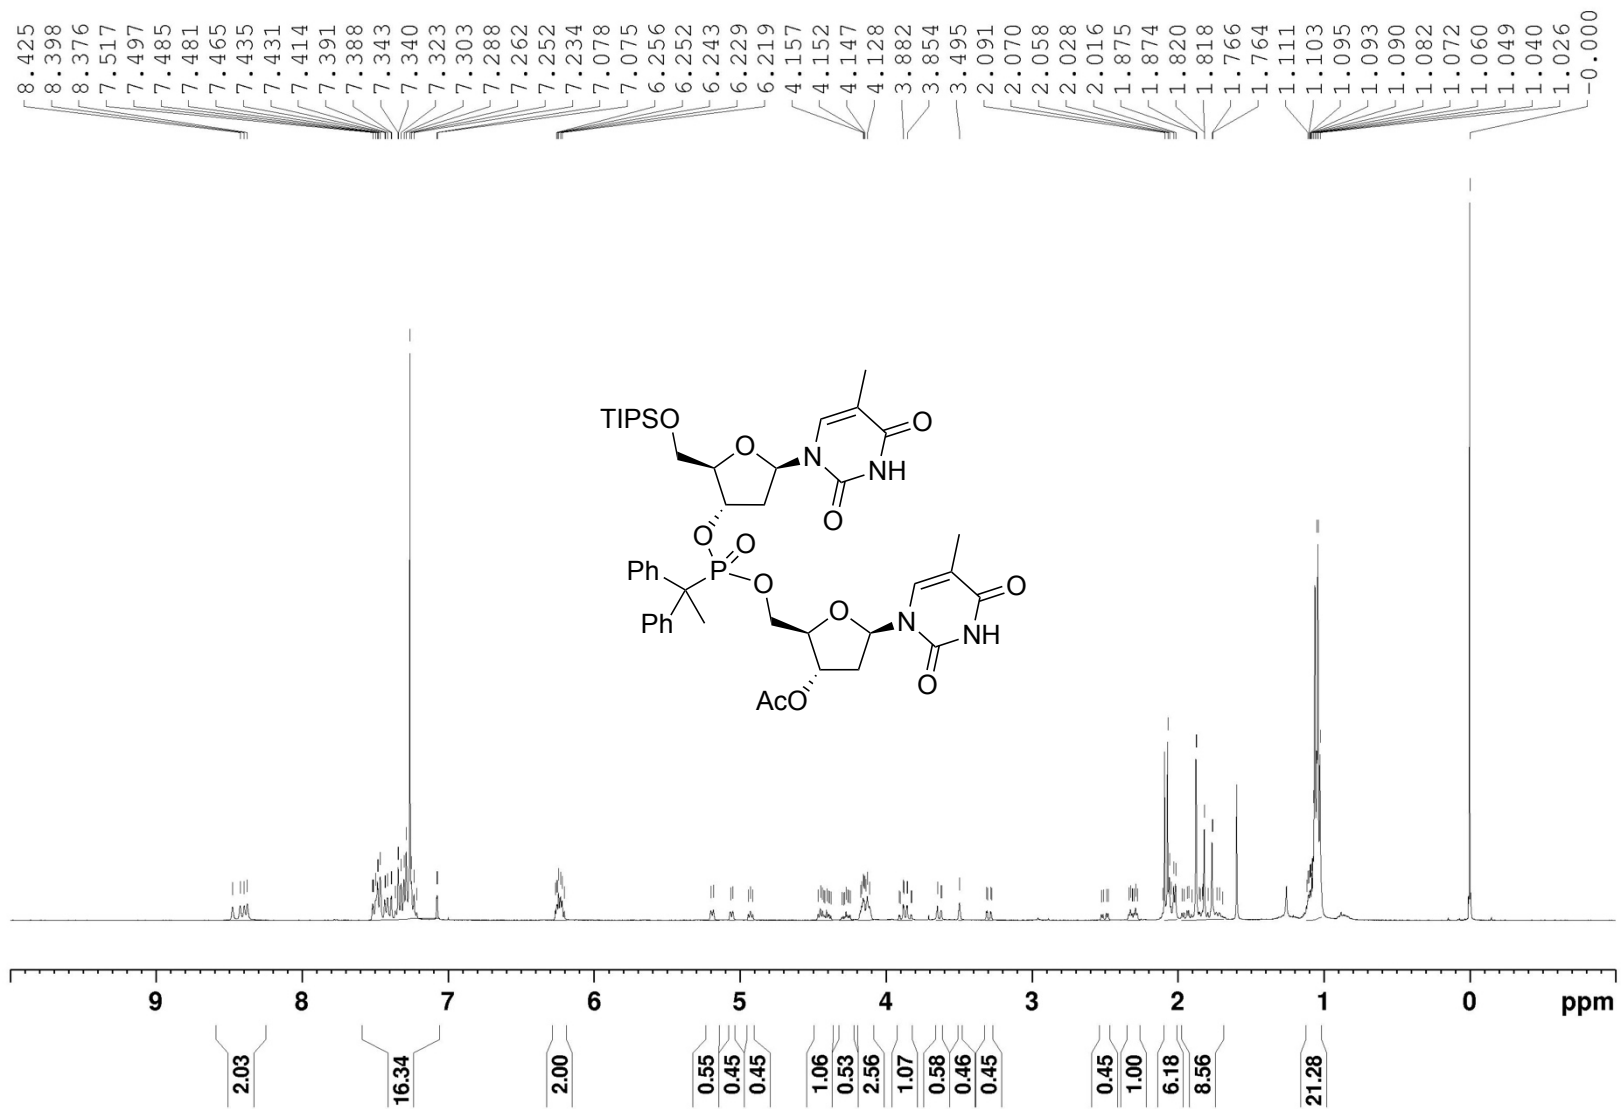

<sup>1</sup>H NMR (400 MHz, CDCl<sub>3</sub>) spectrum of **3ag**

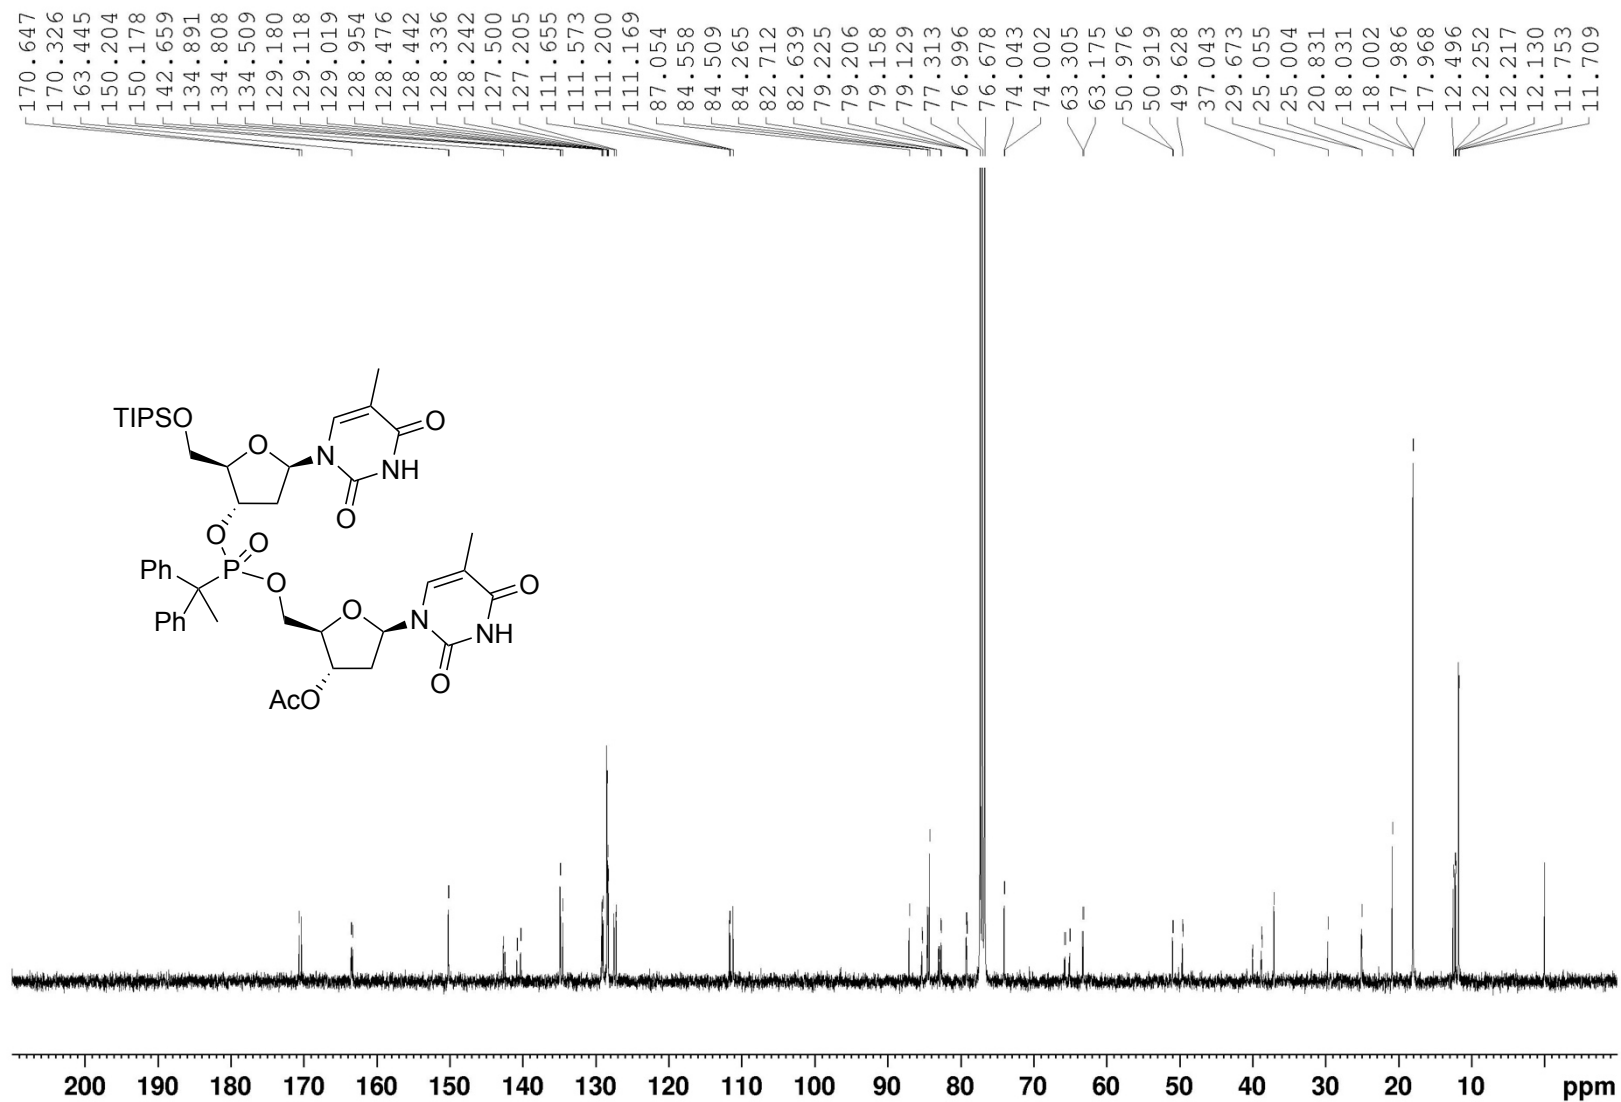

$^{13}\text{C}$  NMR (100.6 MHz,  $\text{CDCl}_3$ ) spectrum of **3ag**

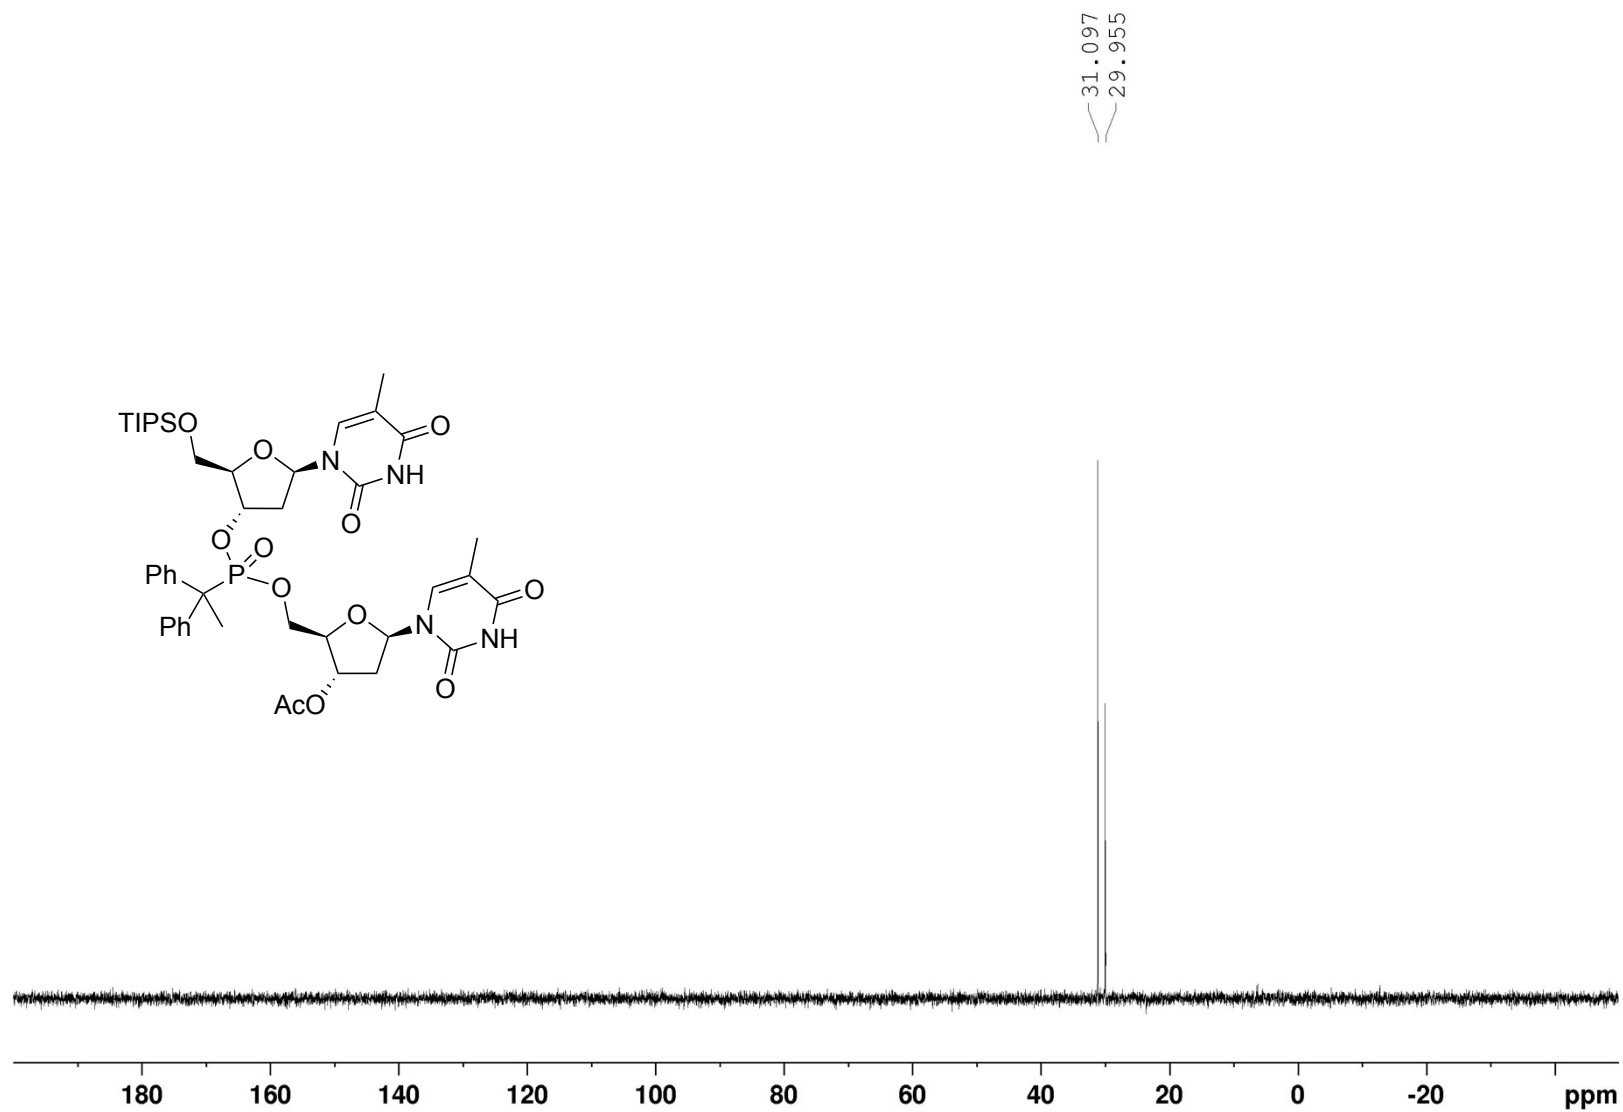

$^{31}\text{P}$  NMR (162 MHz,  $\text{CDCl}_3$ ) spectrum of **3ag**

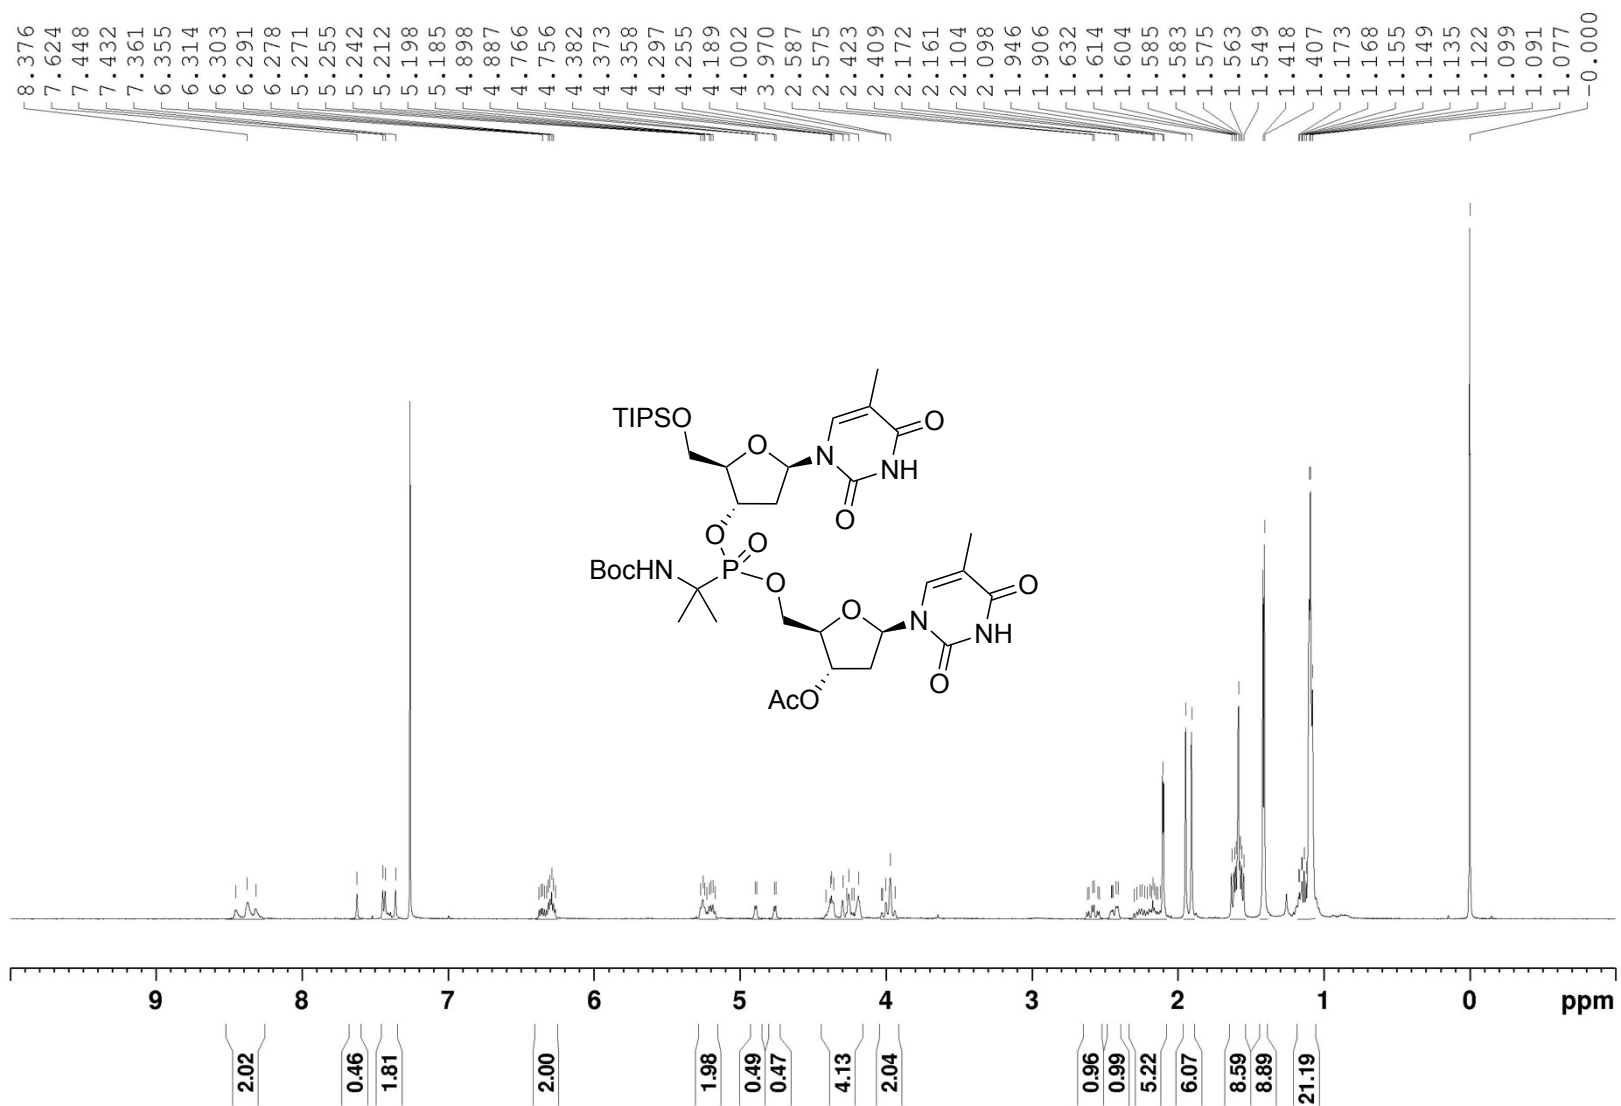

<sup>1</sup>H NMR (400 MHz, CDCl<sub>3</sub>) spectrum of **3ah**



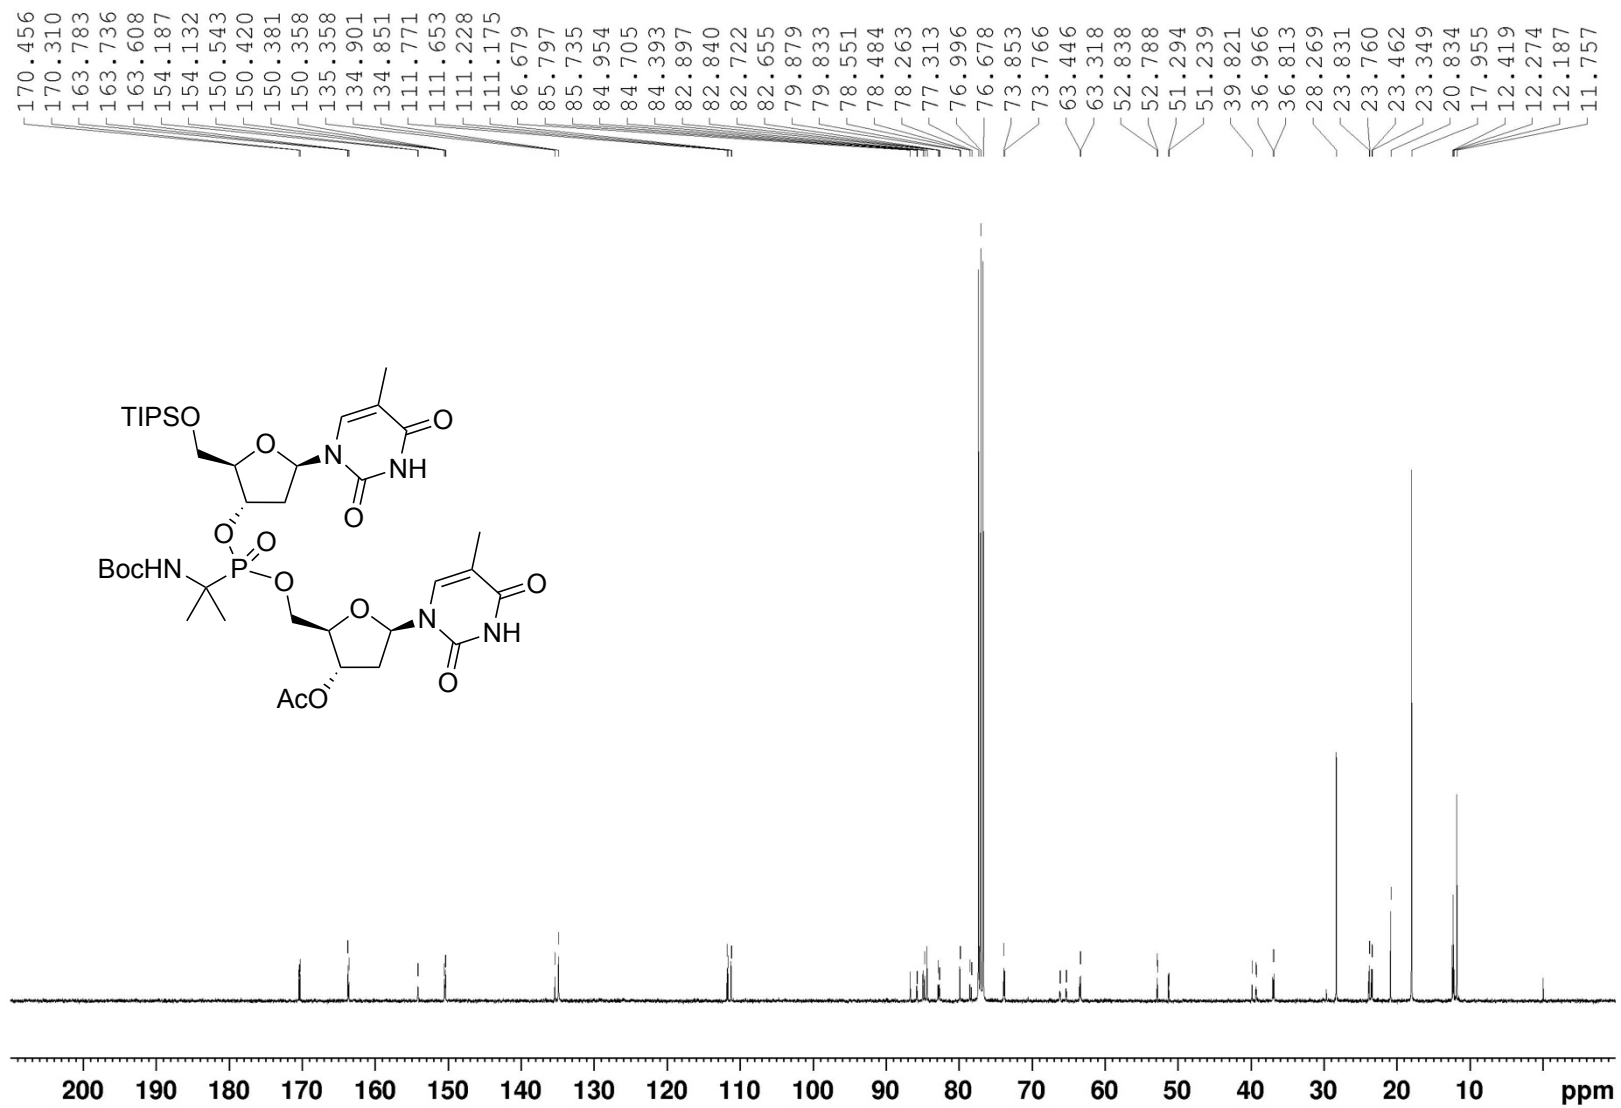

$^{13}\text{C}$  NMR (100.6 MHz,  $\text{CDCl}_3$ ) spectrum of **3ah**

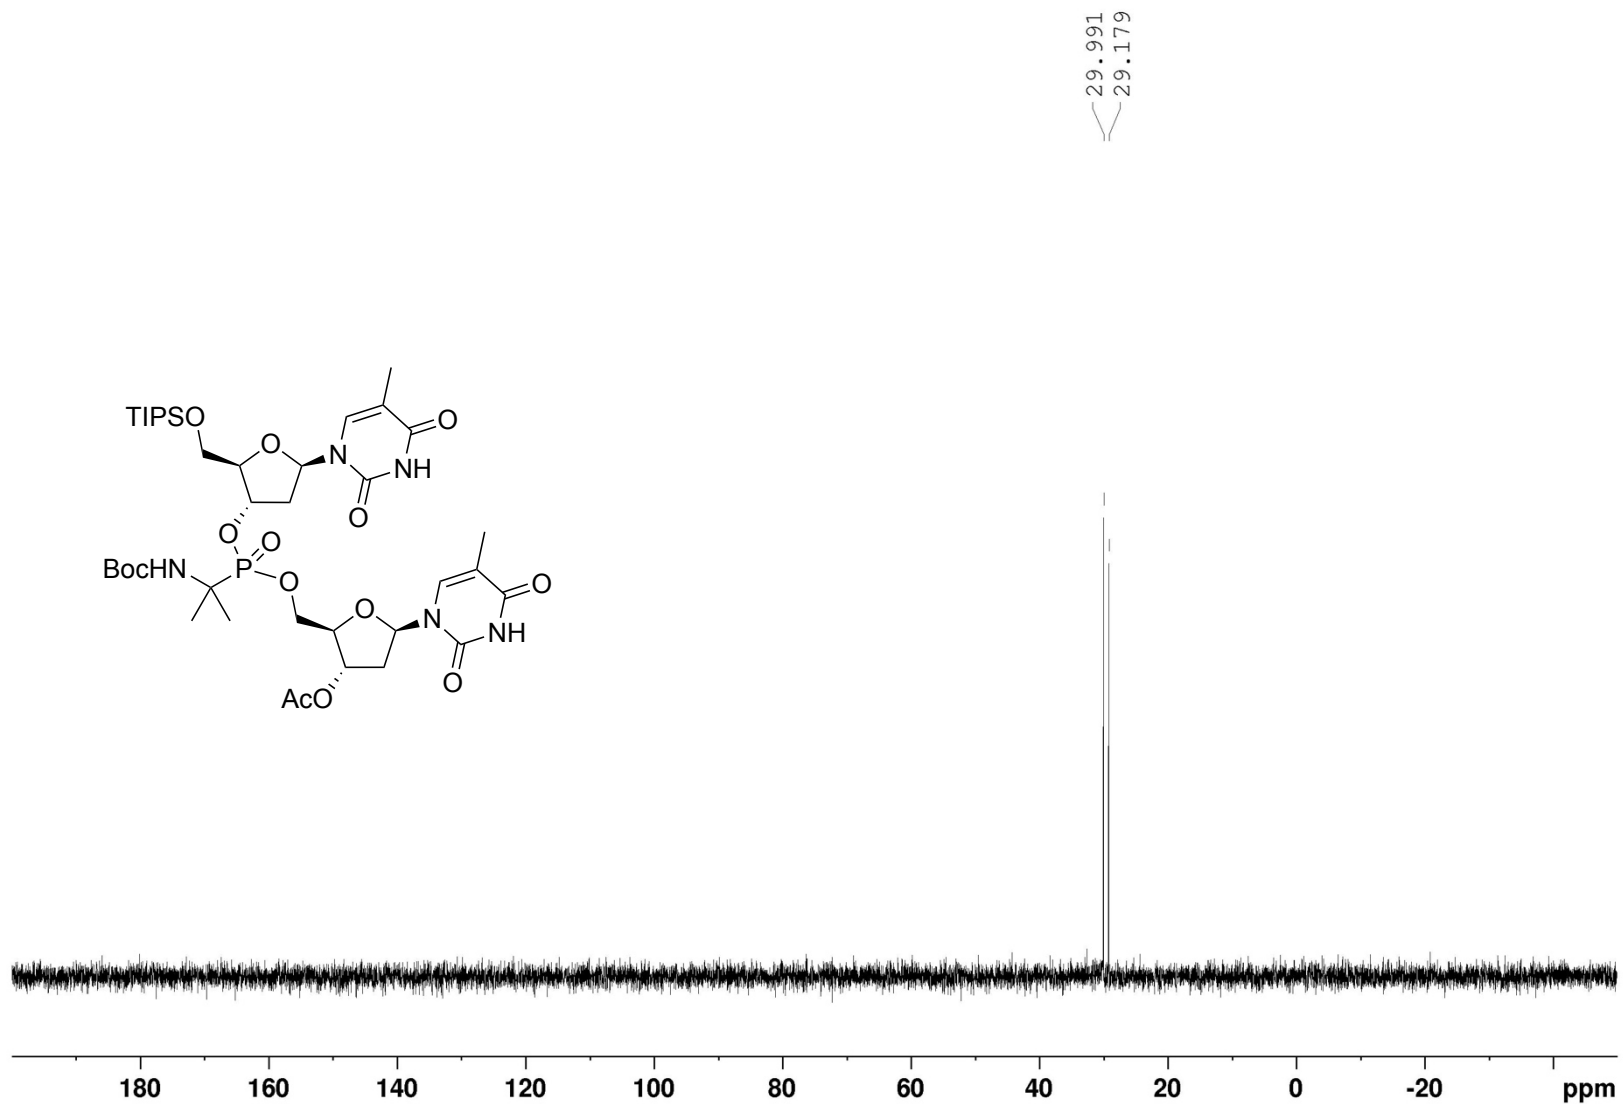

$^{31}\text{P}$  NMR (162 MHz,  $\text{CDCl}_3$ ) spectrum of **3ah**

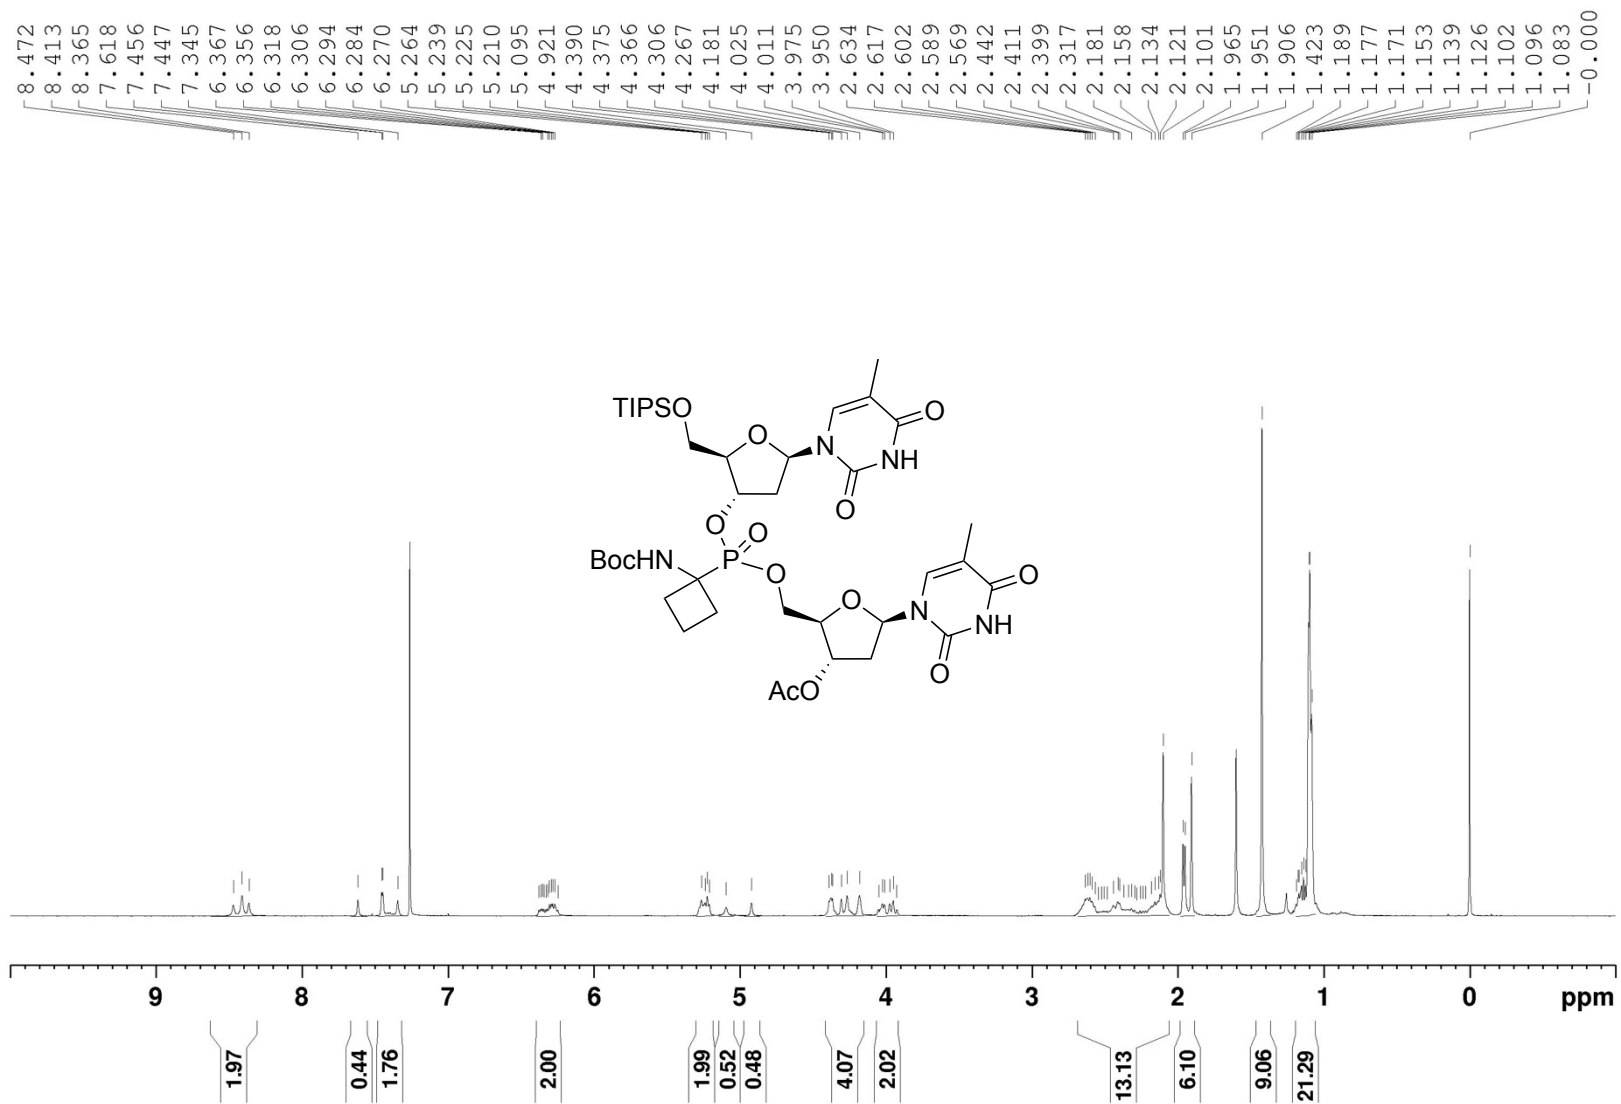

<sup>1</sup>H NMR (400 MHz, CDCl<sub>3</sub>) spectrum of **3ai**

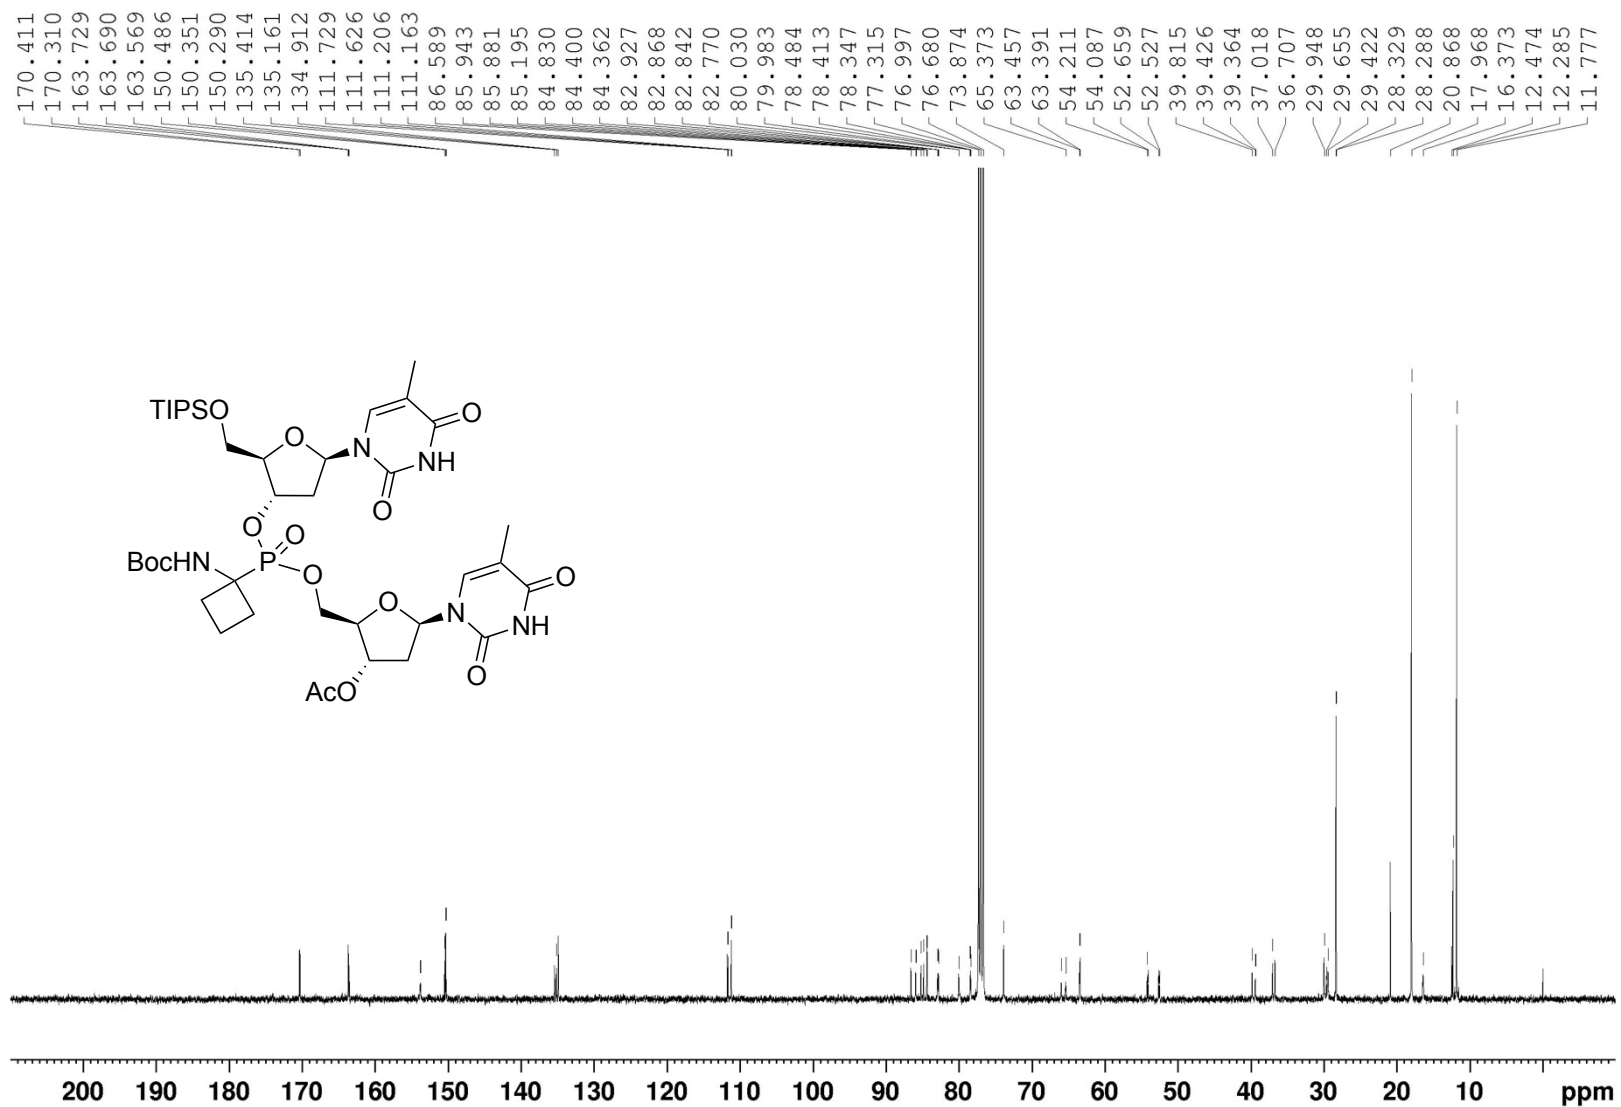

<sup>13</sup>C NMR (100.6 MHz, CDCl<sub>3</sub>) spectrum of **3ai**

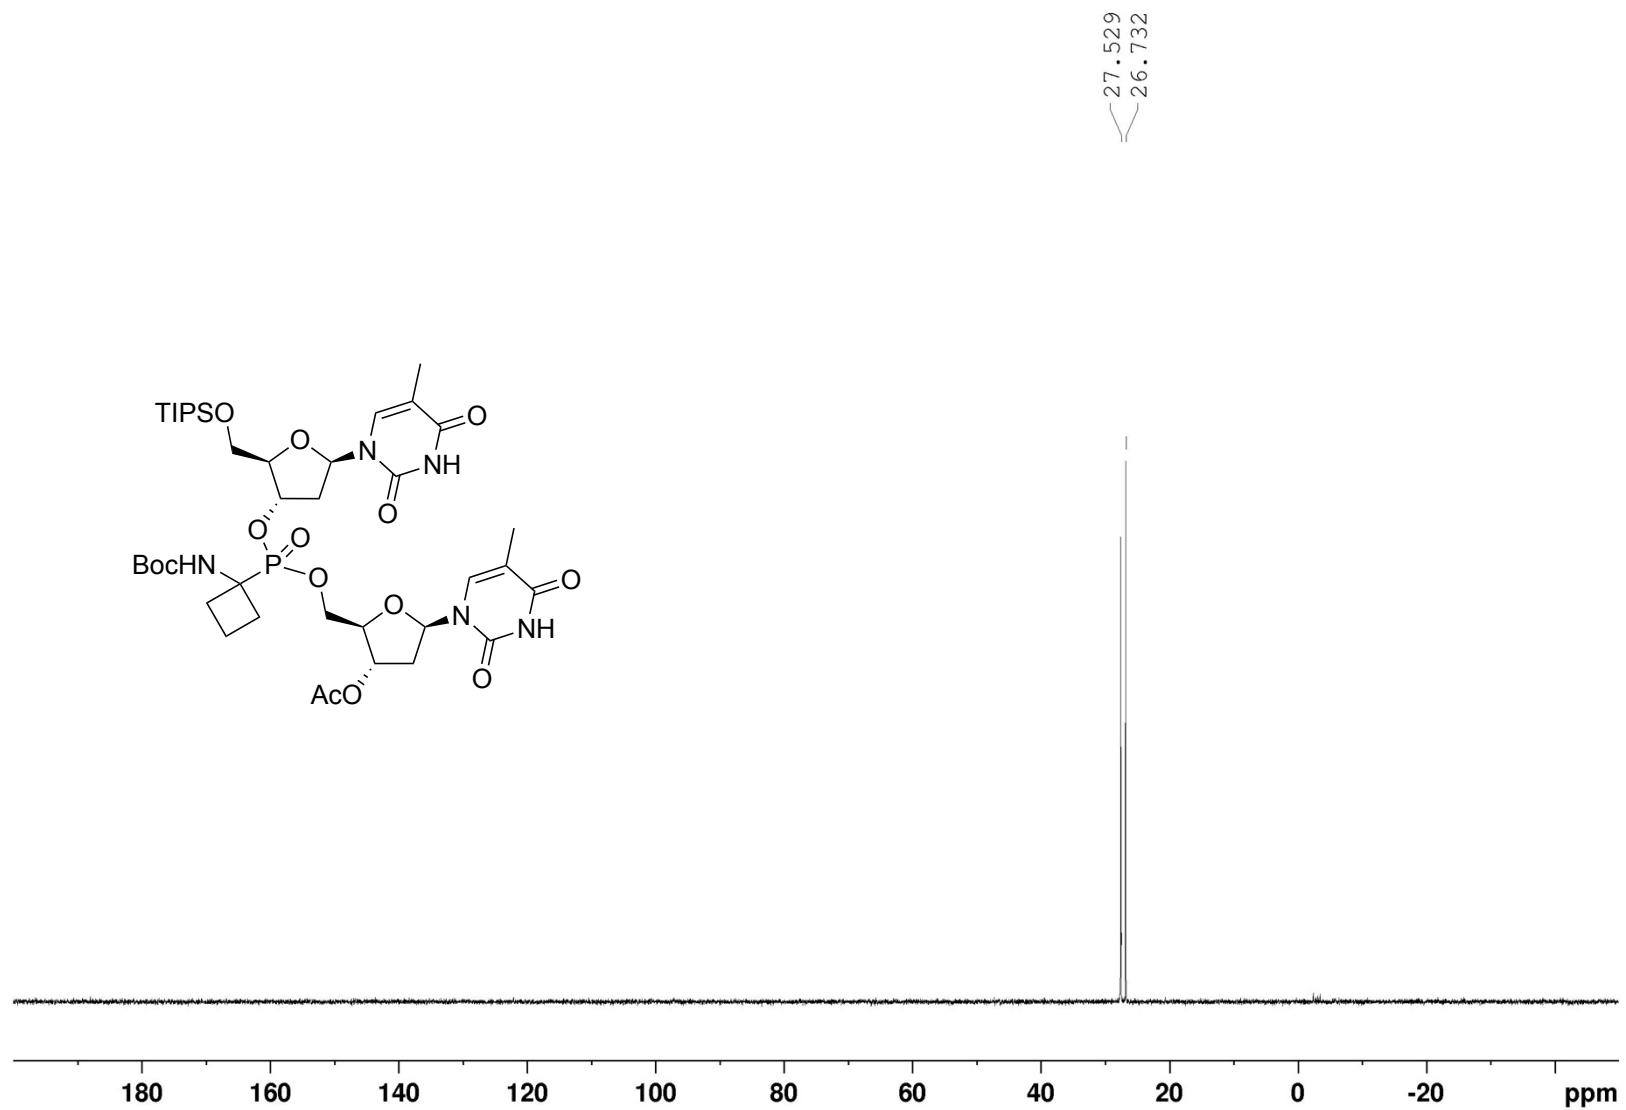

$^{31}\text{P}$  NMR (162 MHz,  $\text{CDCl}_3$ ) spectrum of **3ai**

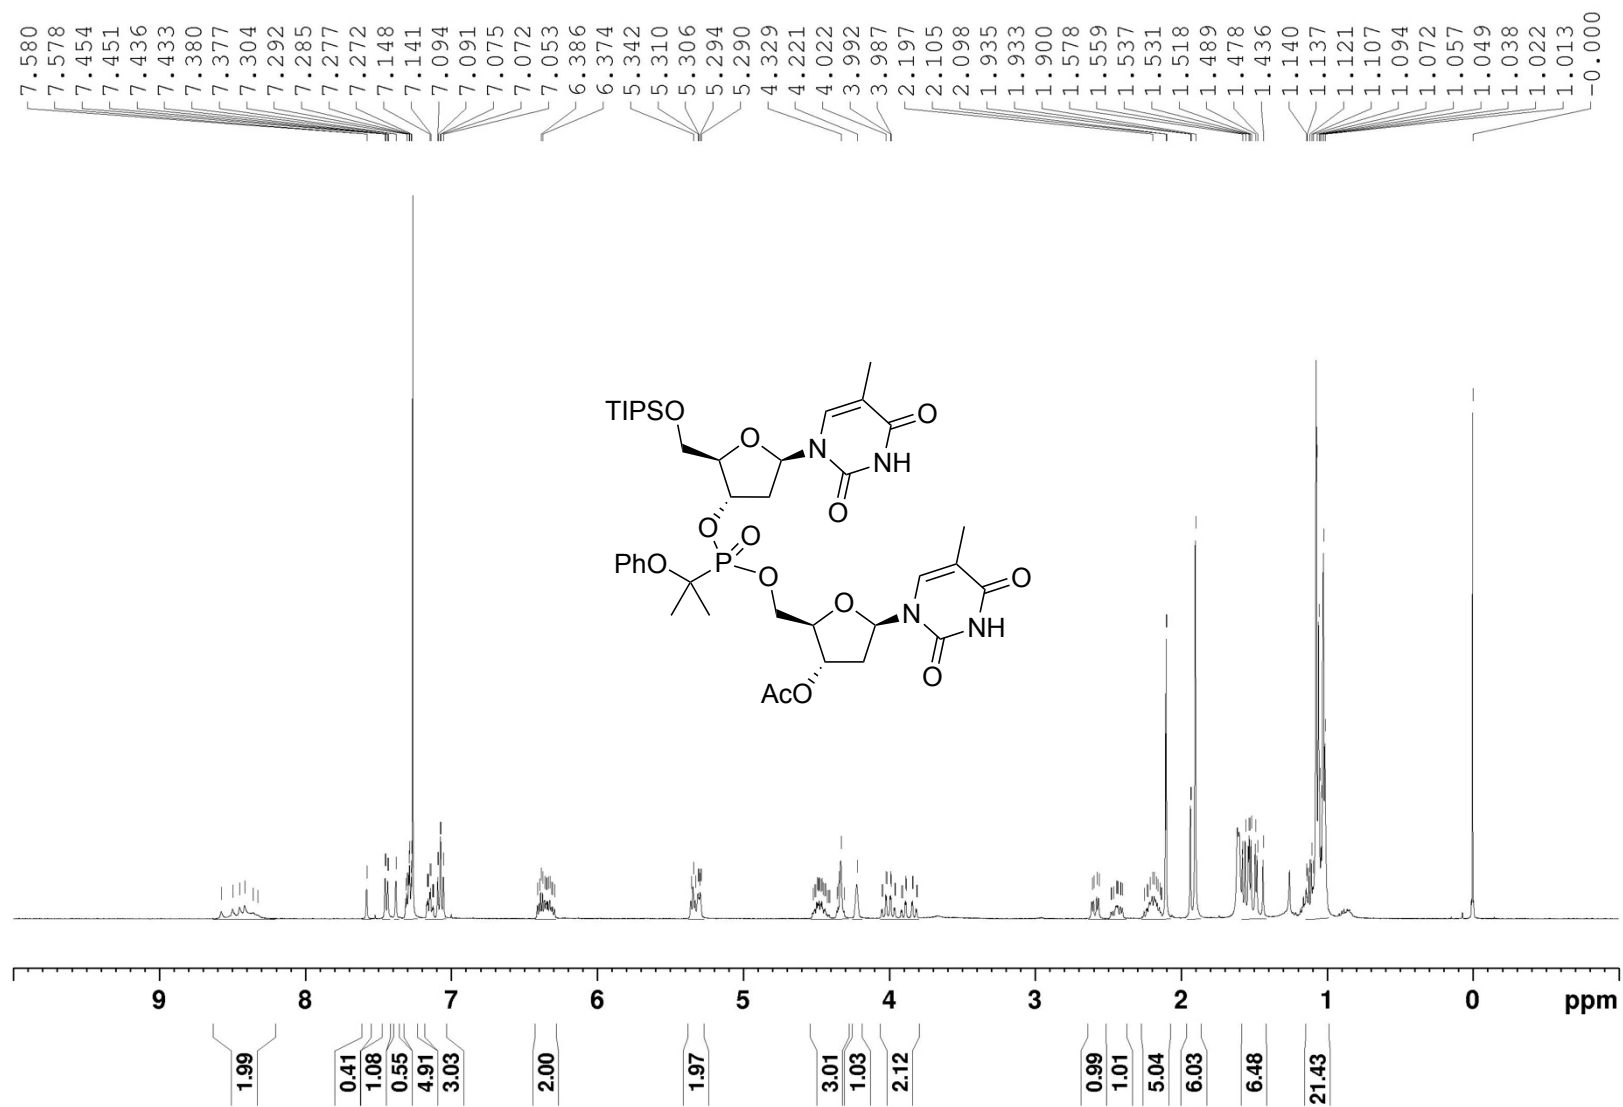

<sup>1</sup>H NMR (400 MHz, CDCl<sub>3</sub>) spectrum of **3aj**

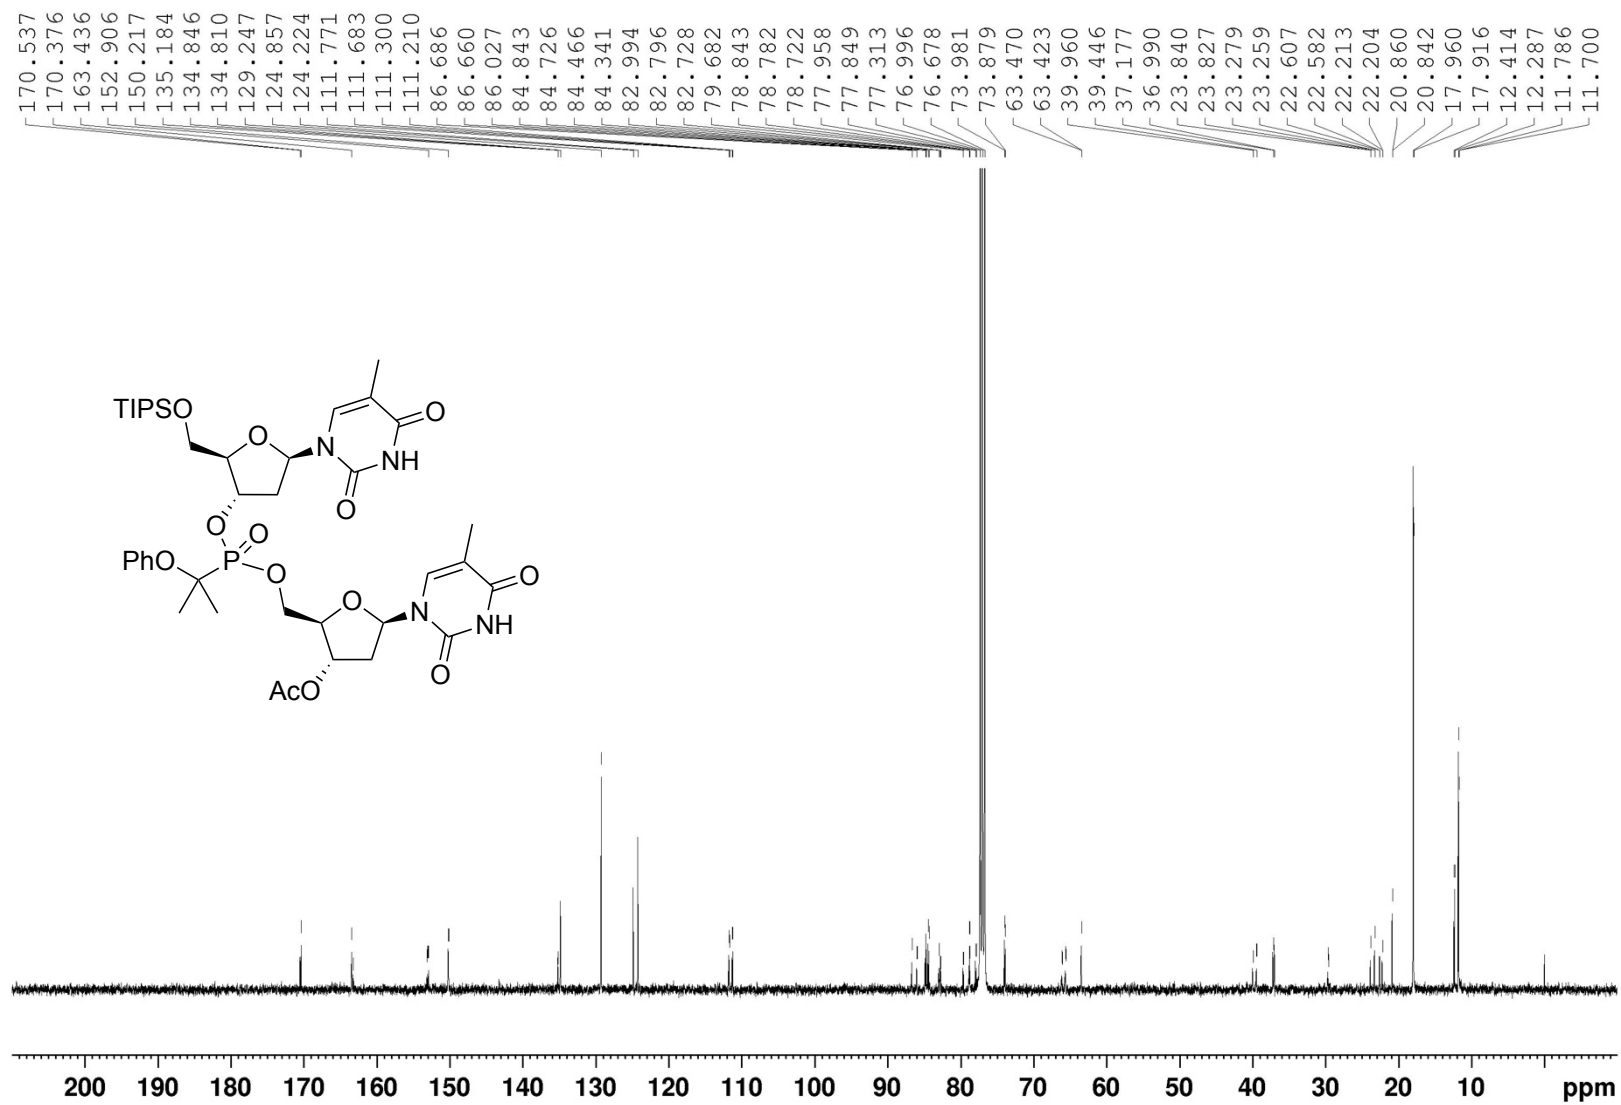

<sup>13</sup>C NMR (100.6 MHz, CDCl<sub>3</sub>) spectrum of **3aj**

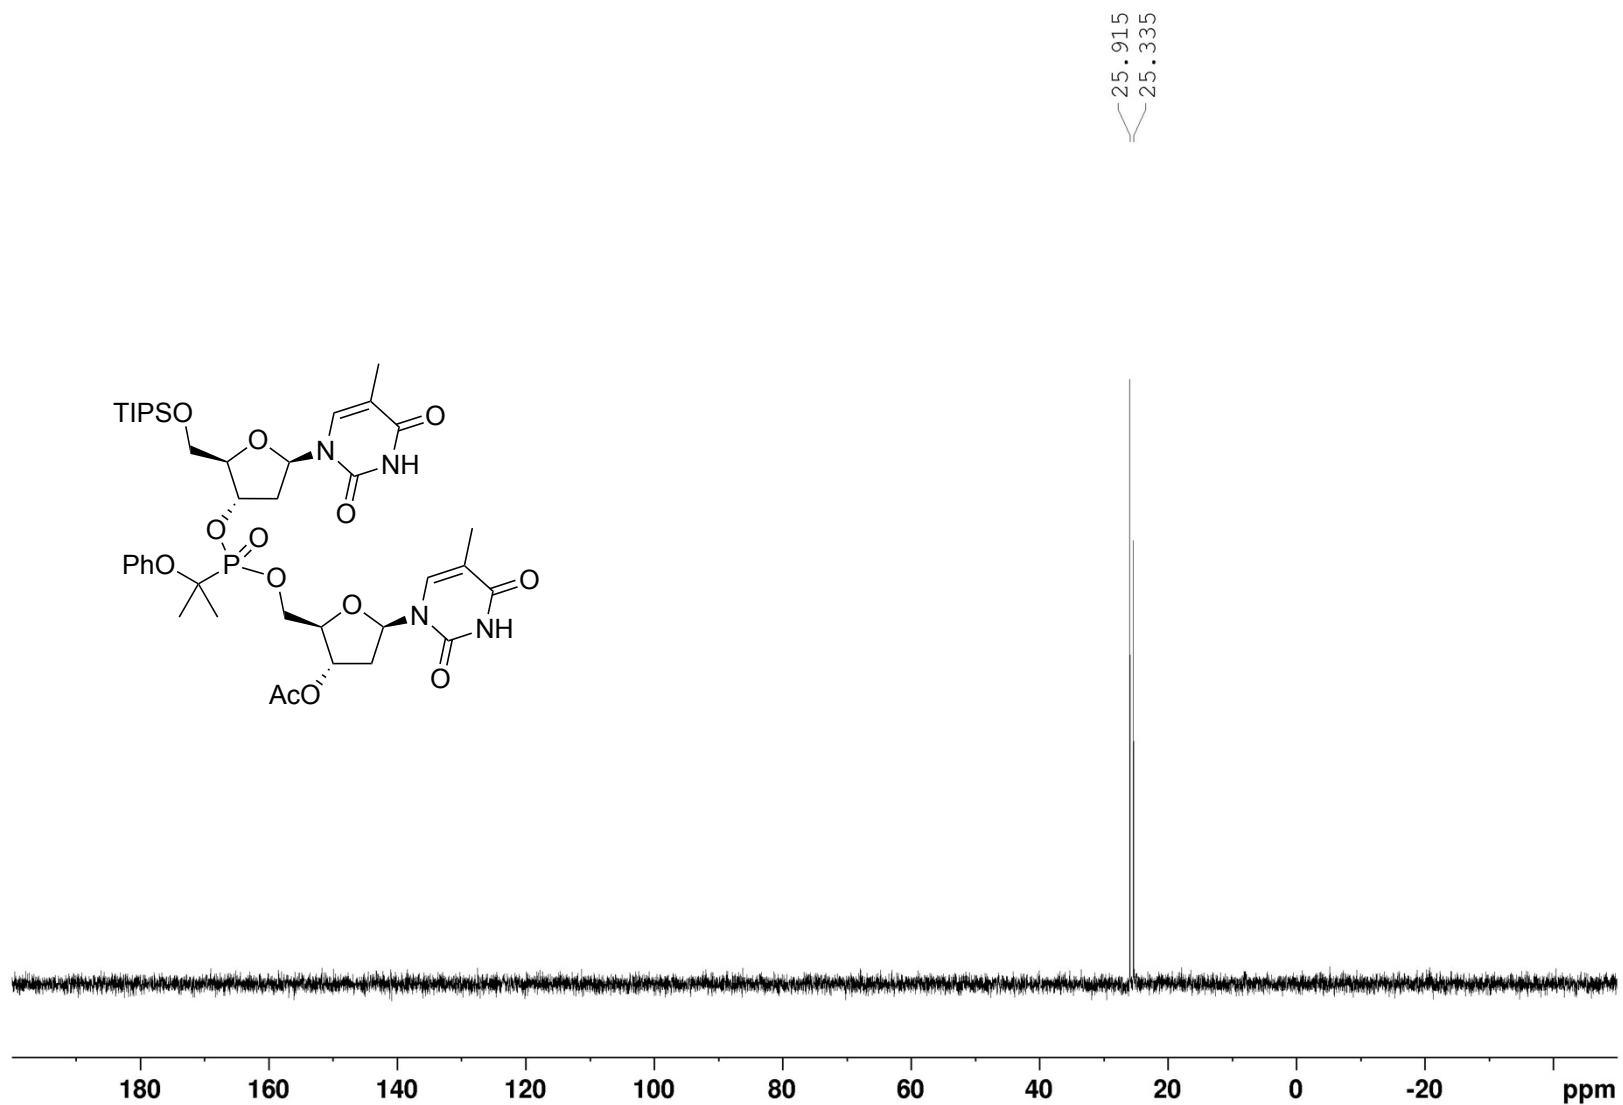

$^{31}\text{P}$  NMR (162 MHz,  $\text{CDCl}_3$ ) spectrum of **3aj**



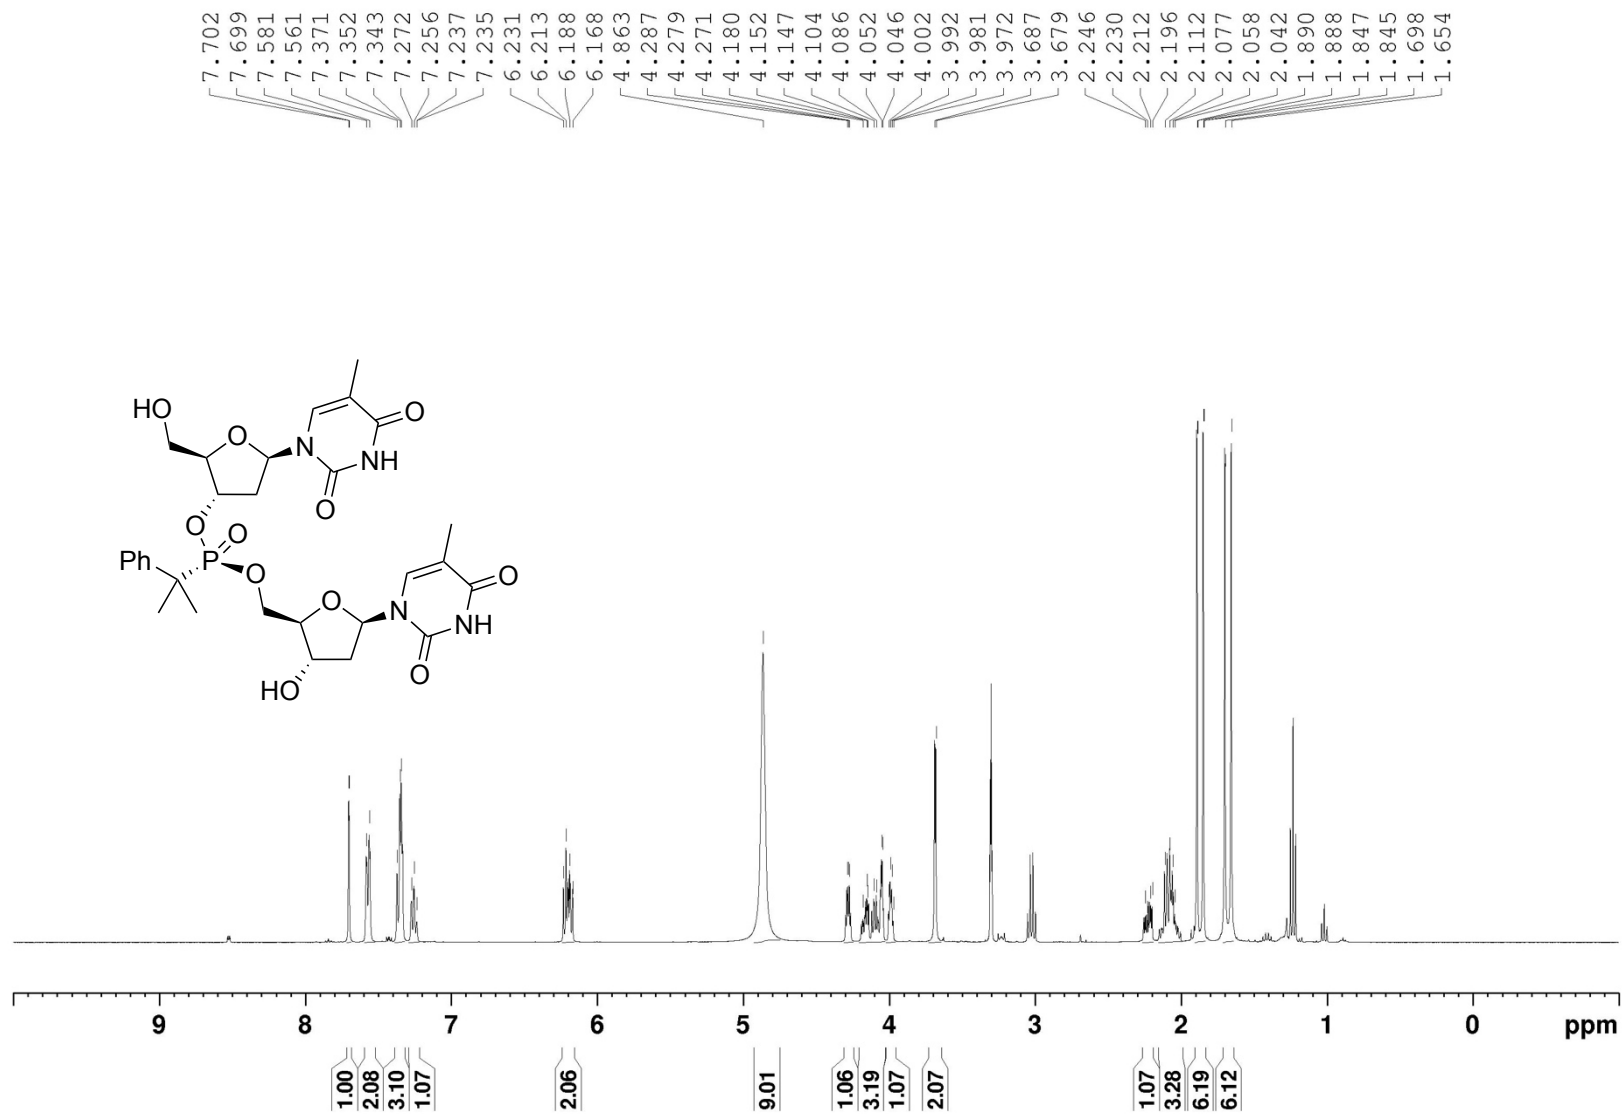

<sup>1</sup>H NMR (400 MHz, CD<sub>3</sub>OD) spectrum of **(S<sub>P</sub>)-3aa-1**

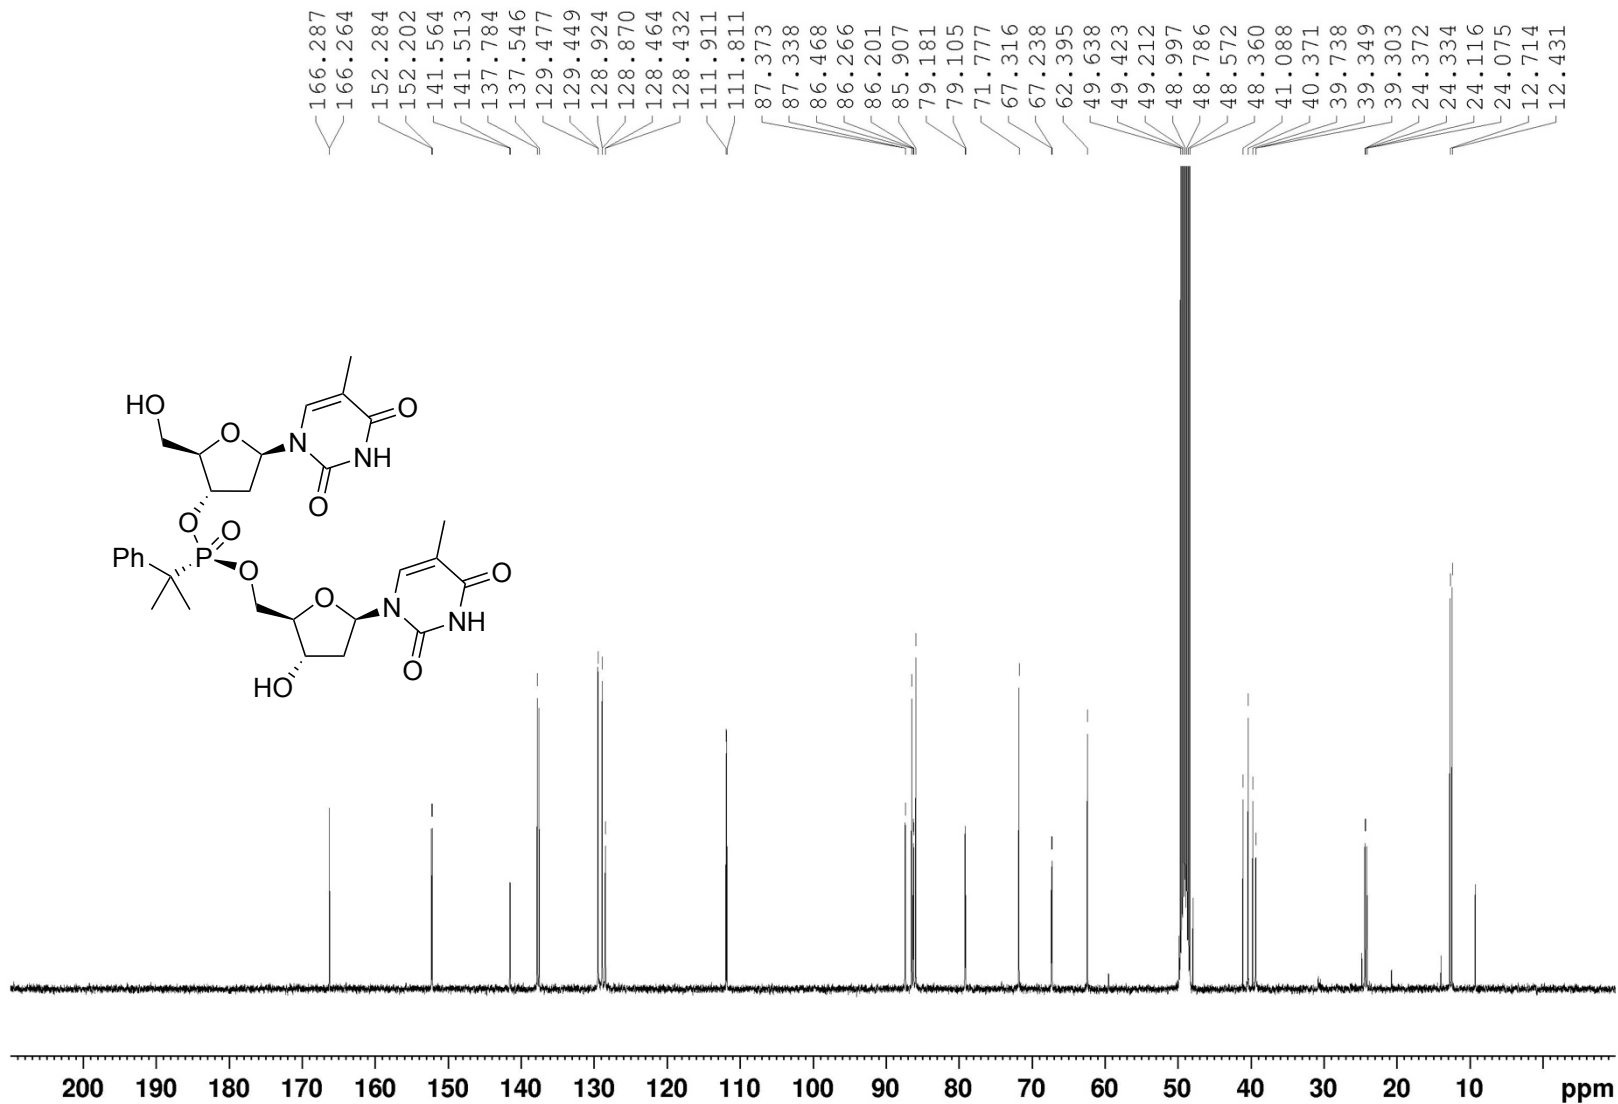

<sup>13</sup>C NMR (100.6 MHz, CD<sub>3</sub>OD) spectrum of **(S<sub>P</sub>)-3aa-1**

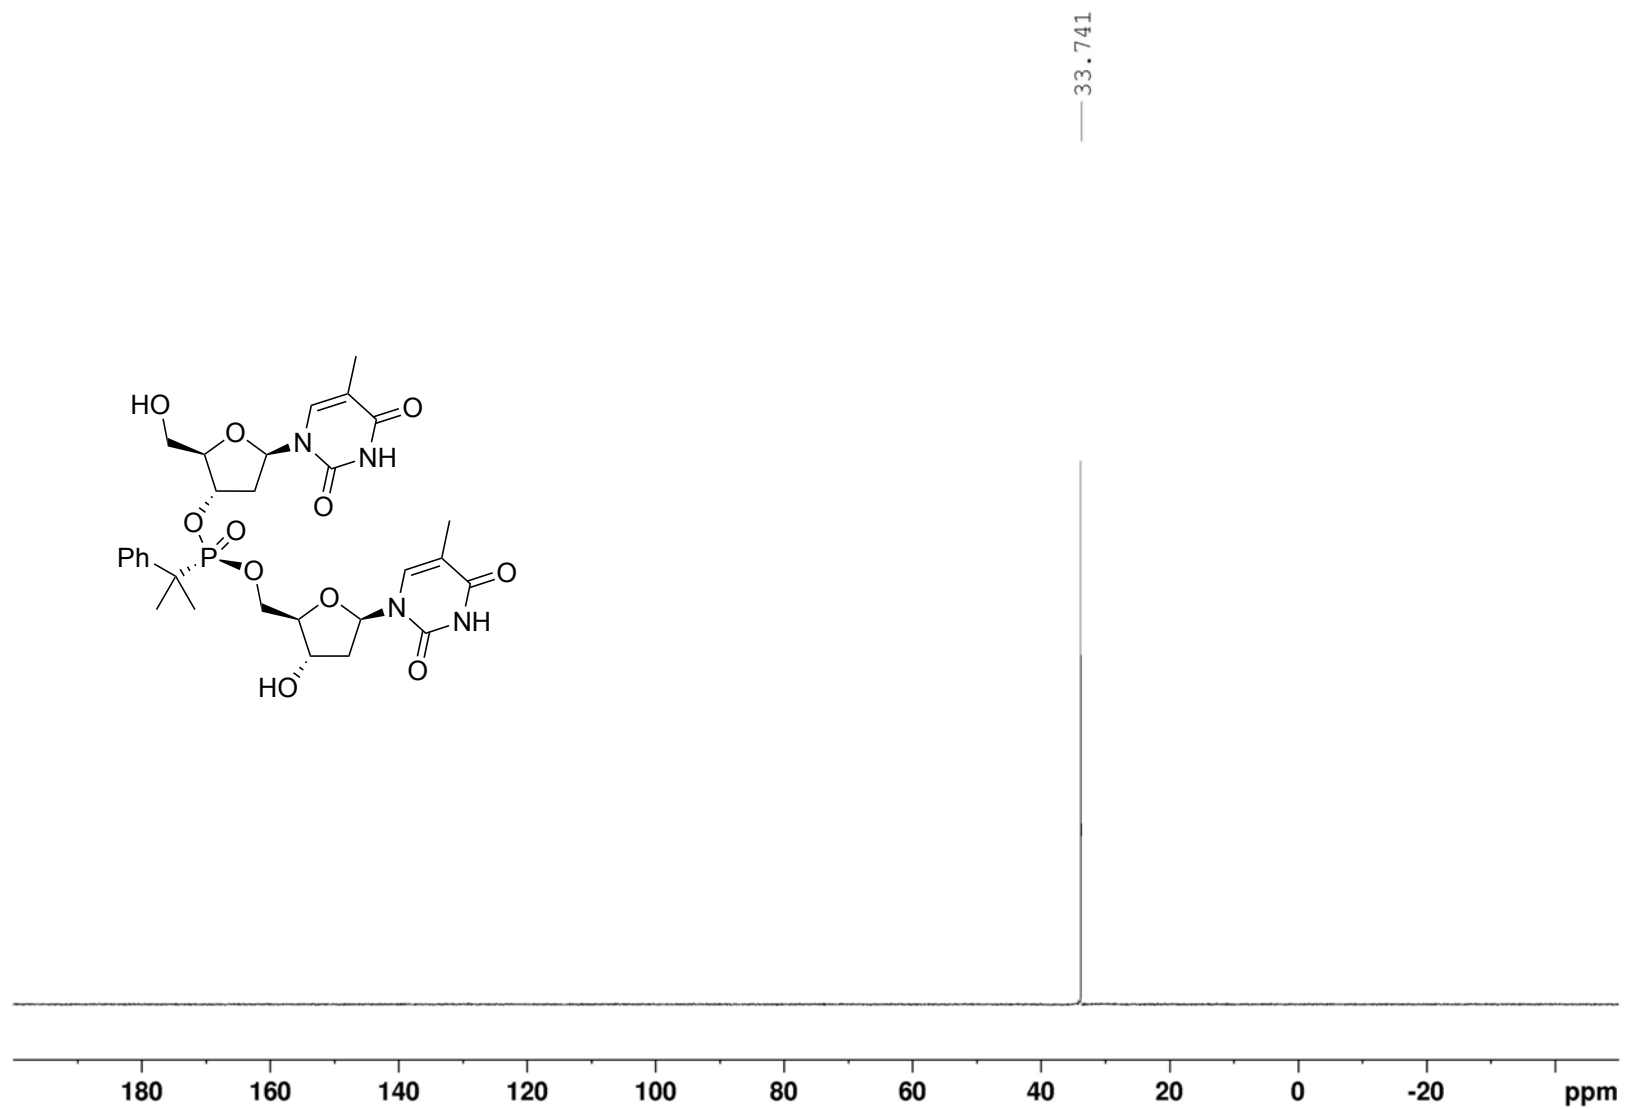

<sup>31</sup>P NMR (162 MHz, CD<sub>3</sub>OD) spectrum of (S<sub>P</sub>)-3aa-1

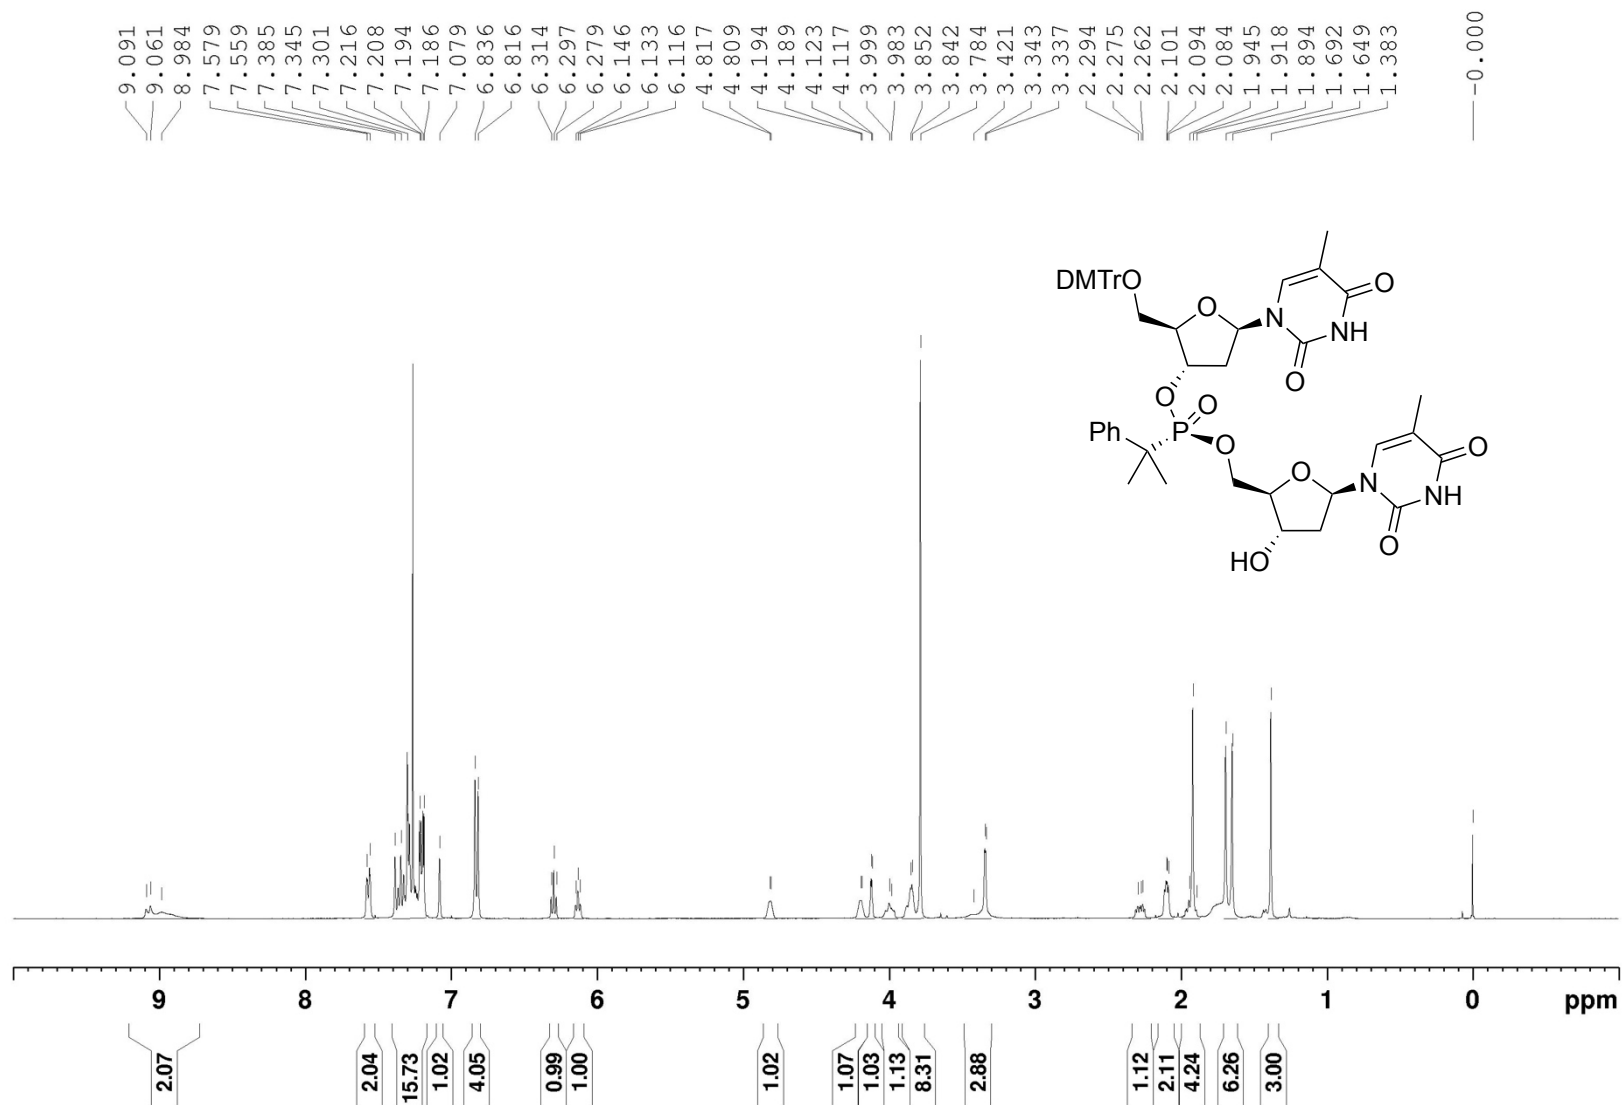

<sup>1</sup>H NMR (400 MHz, CDCl<sub>3</sub>) spectrum of (Sp)-3aa-2

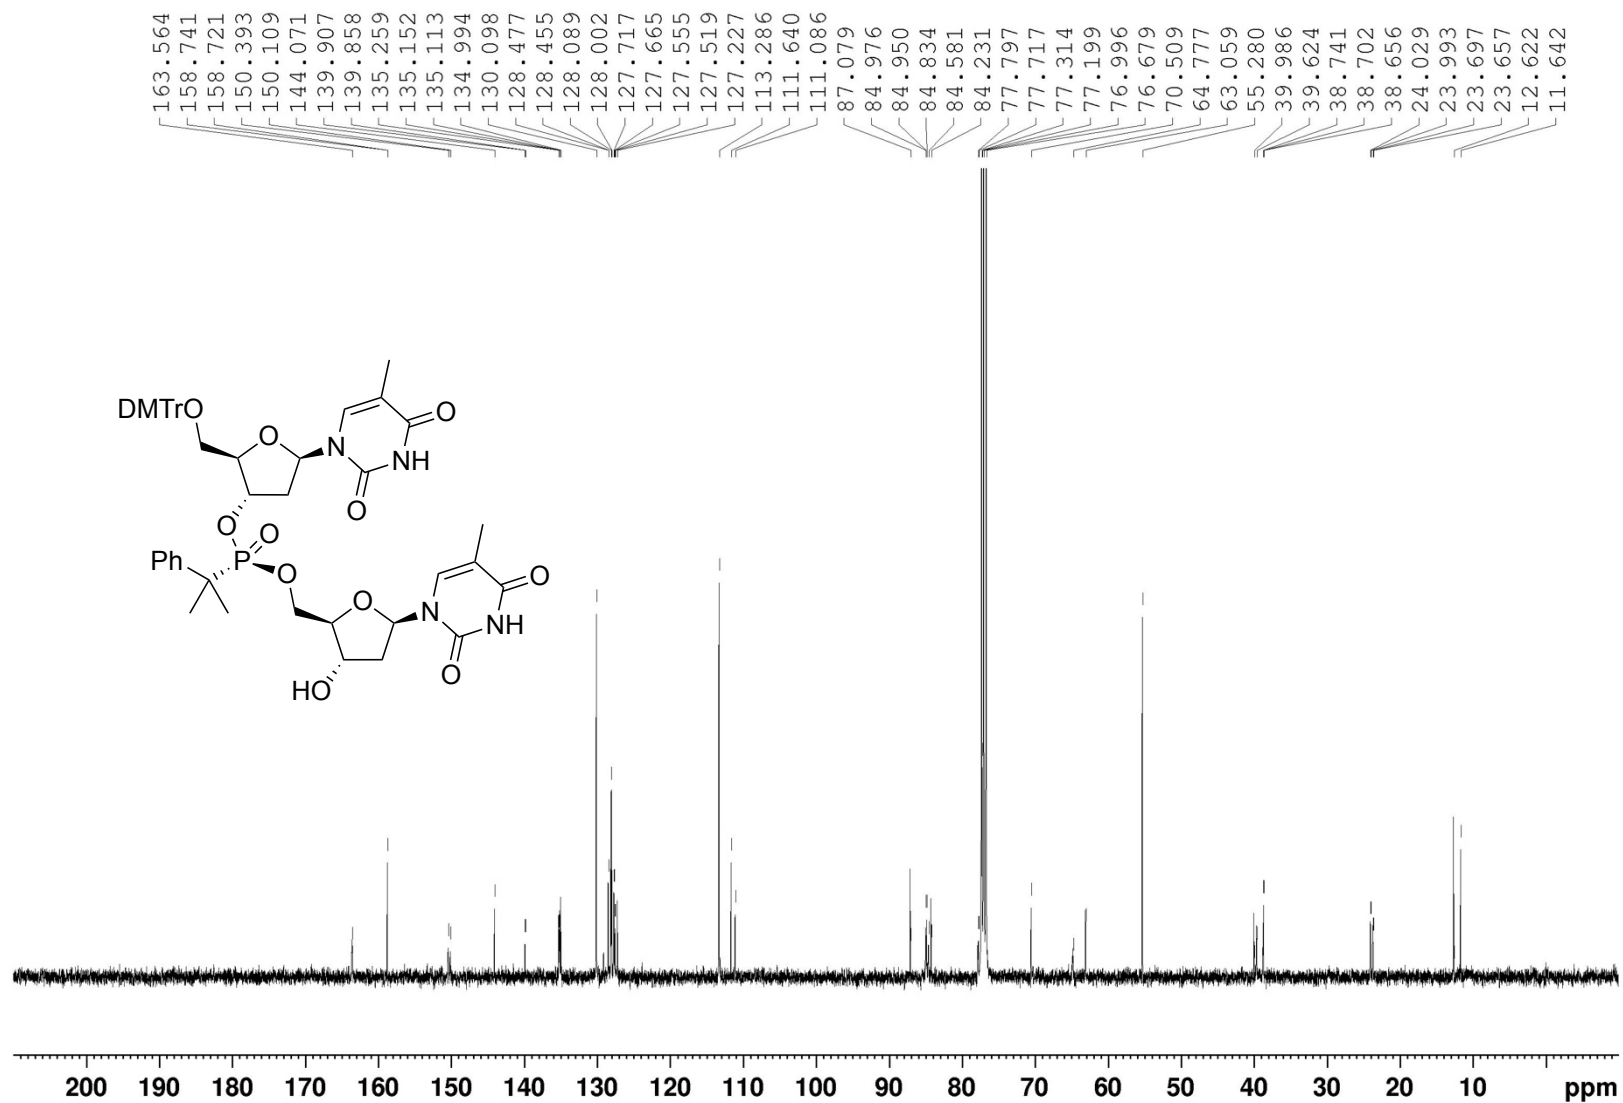

<sup>13</sup>C NMR (100.6 MHz, CDCl<sub>3</sub>) spectrum of **(S)-3aa-2**

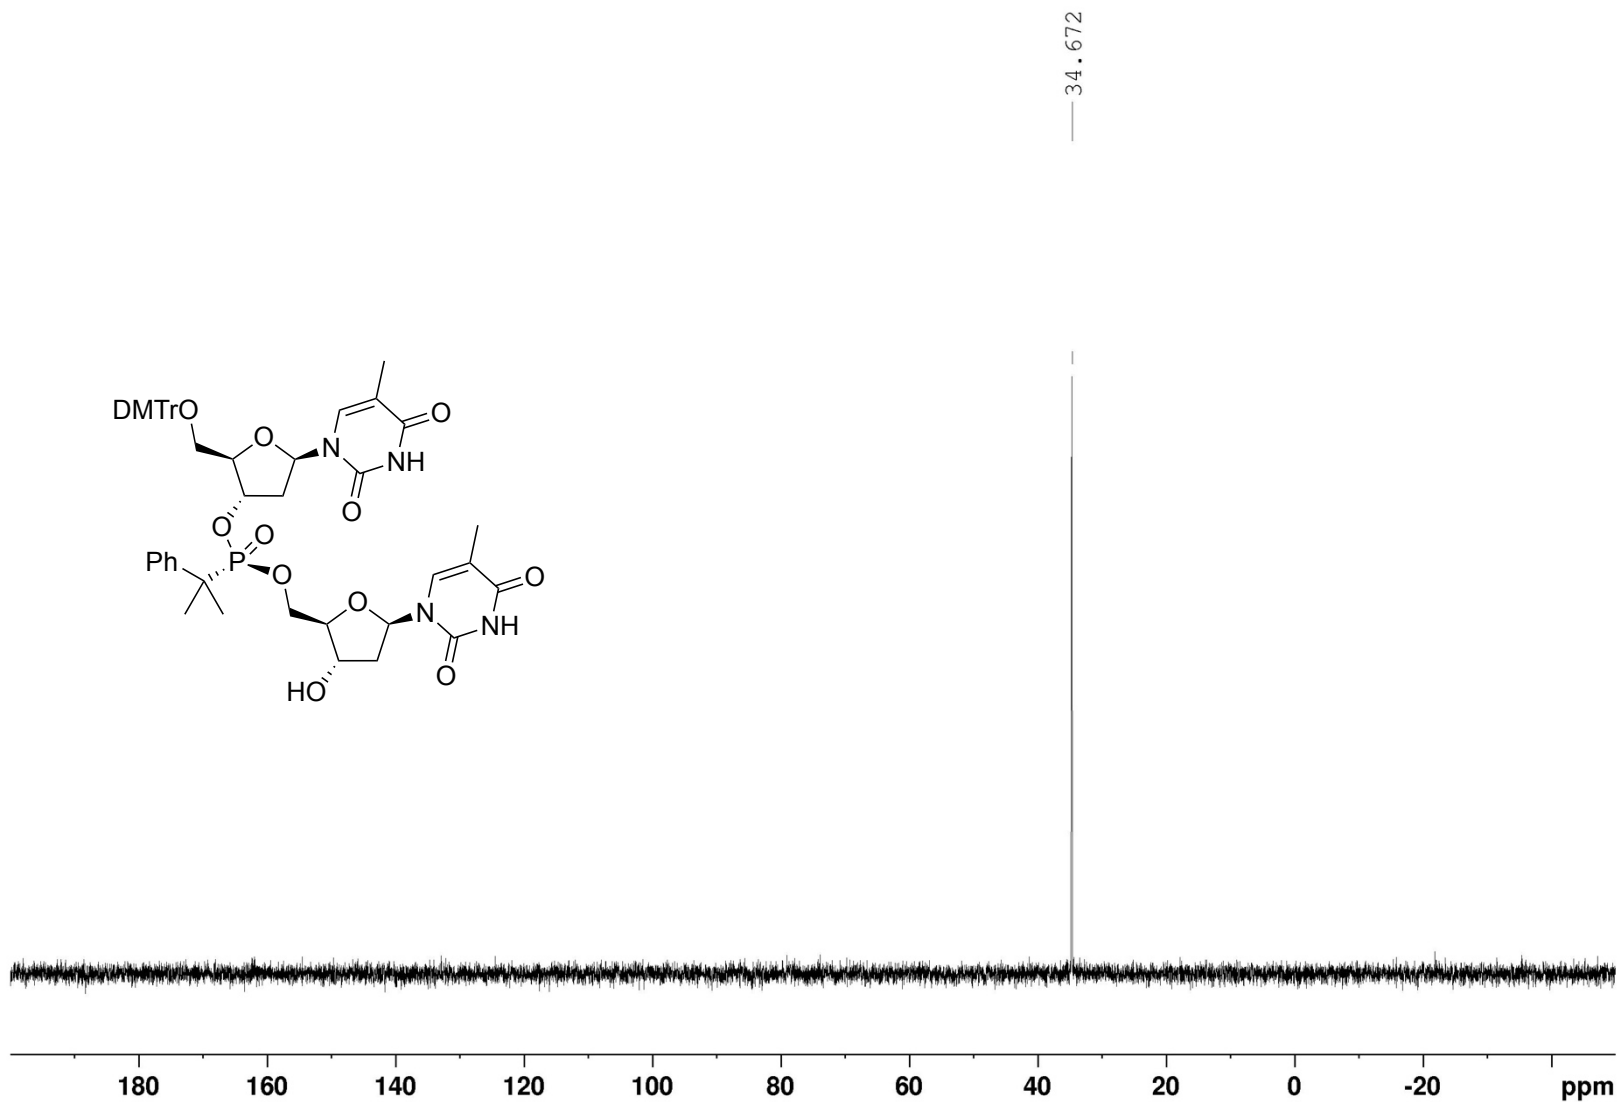

<sup>31</sup>P NMR (162 MHz, CDCl<sub>3</sub>) spectrum of *(S<sub>P</sub>)-3aa-2*

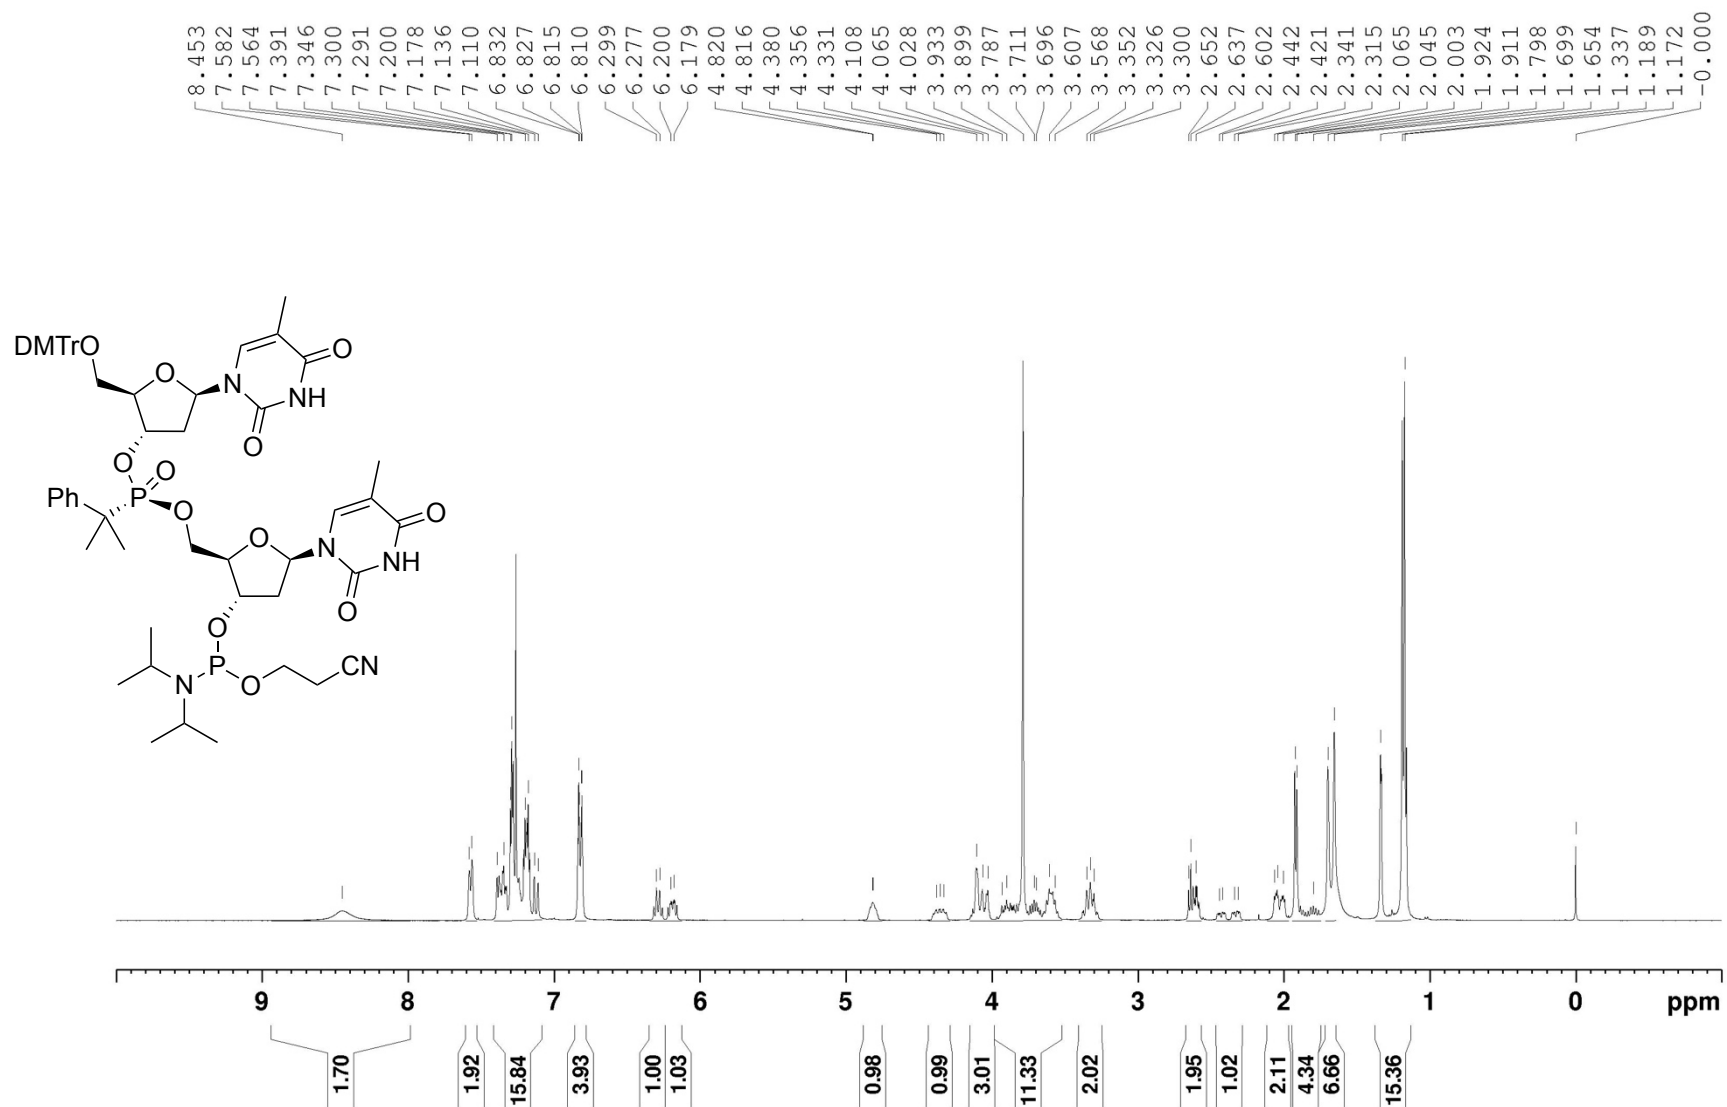

<sup>1</sup>H NMR (400 MHz, CDCl<sub>3</sub>) spectrum of **(Sp)-3aa-3**

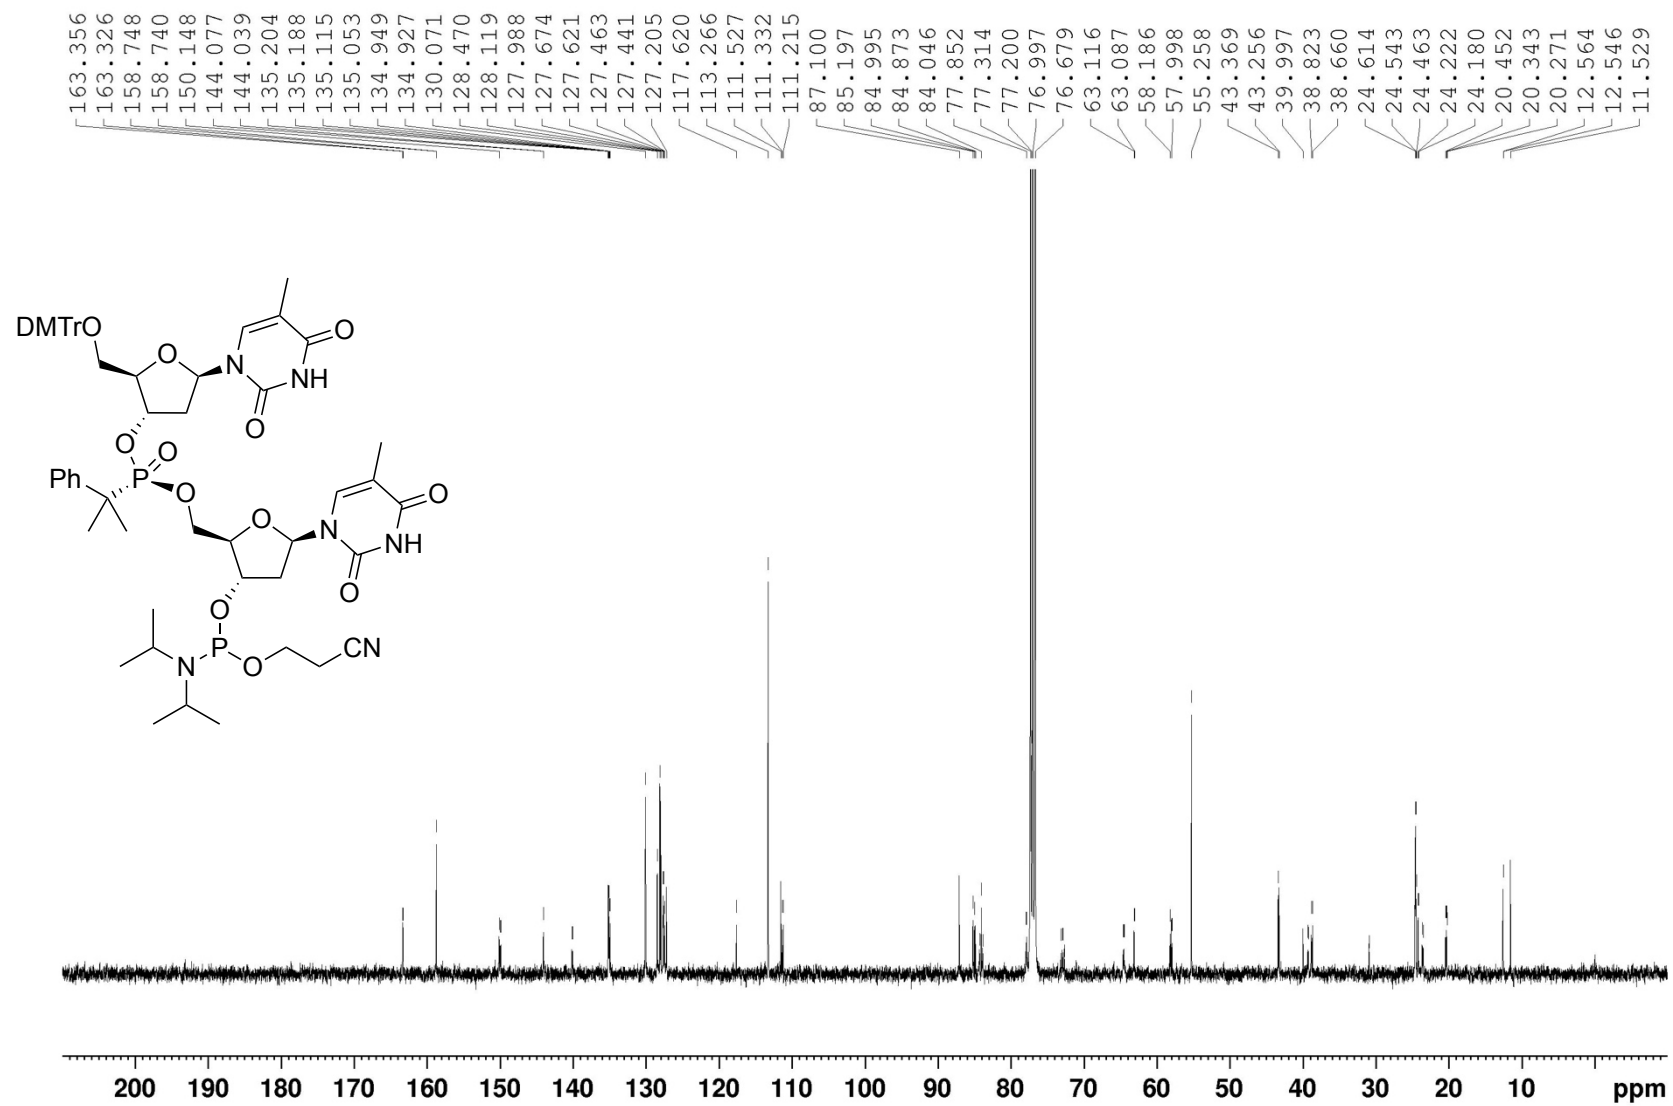

<sup>13</sup>C NMR (100.6 MHz, CDCl<sub>3</sub>) spectrum of (S)-3aa-3



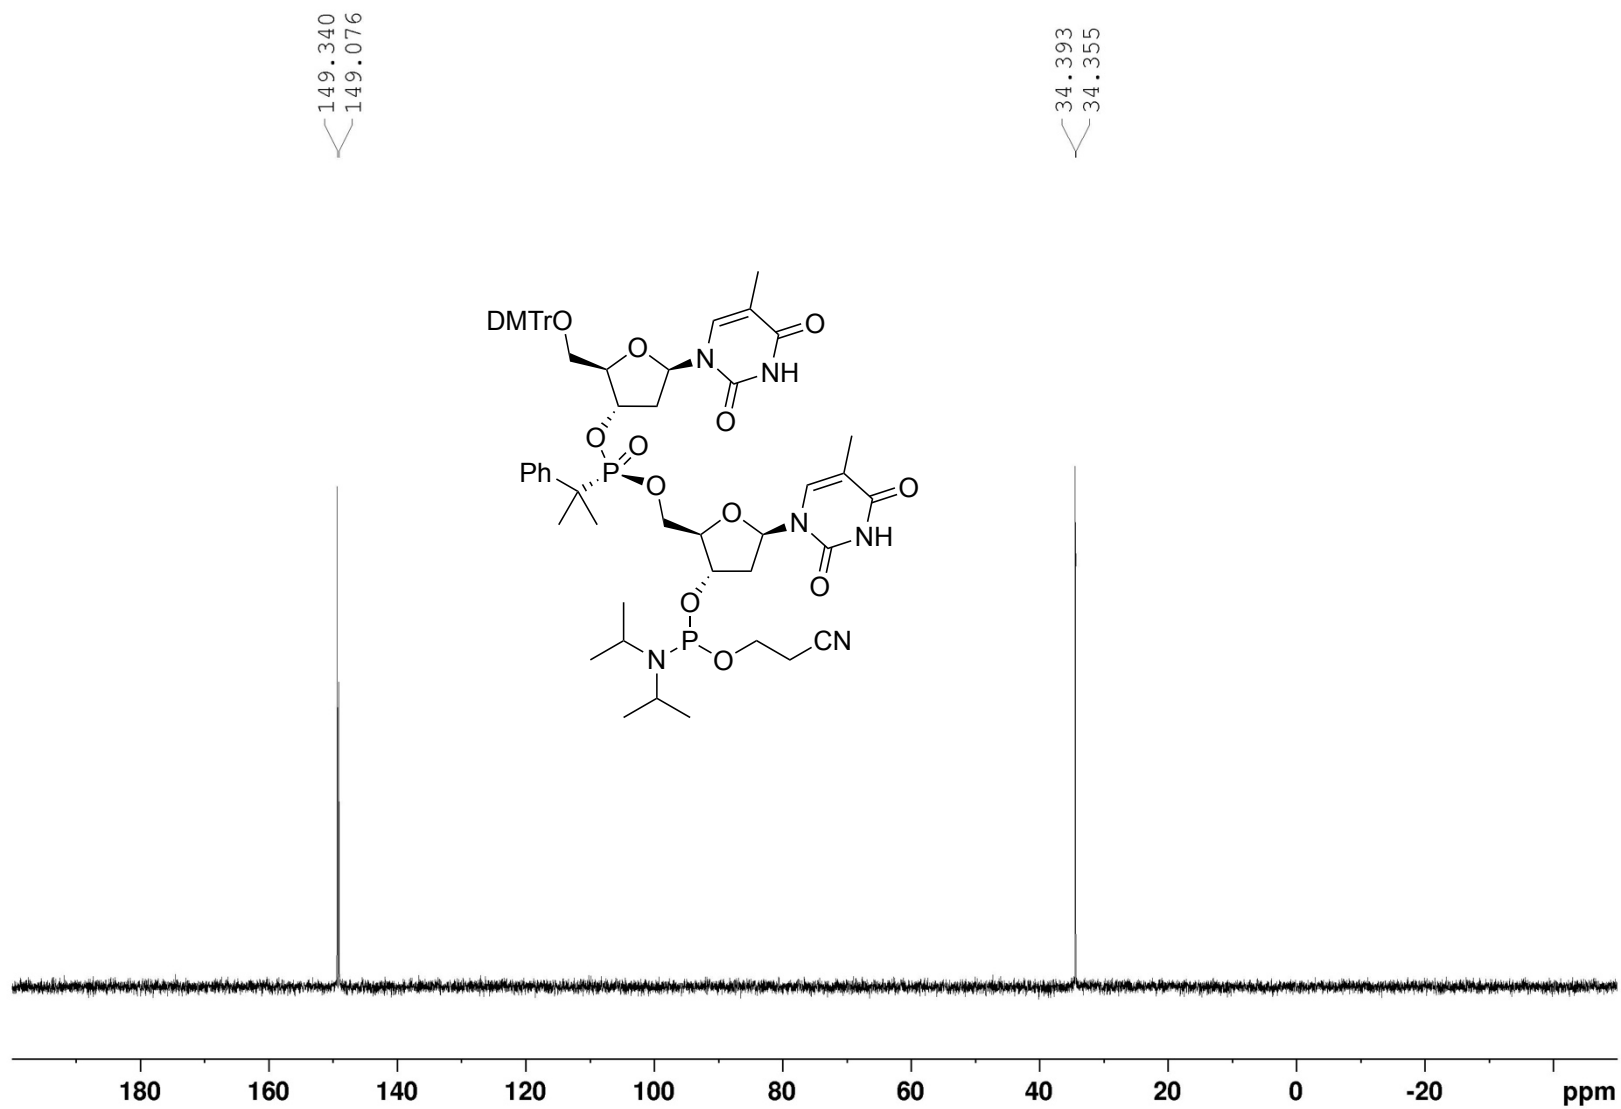

$^{31}\text{P}$  NMR (162 MHz,  $\text{CDCl}_3$ ) spectrum of  $(S_P)\text{-3aa-3}$

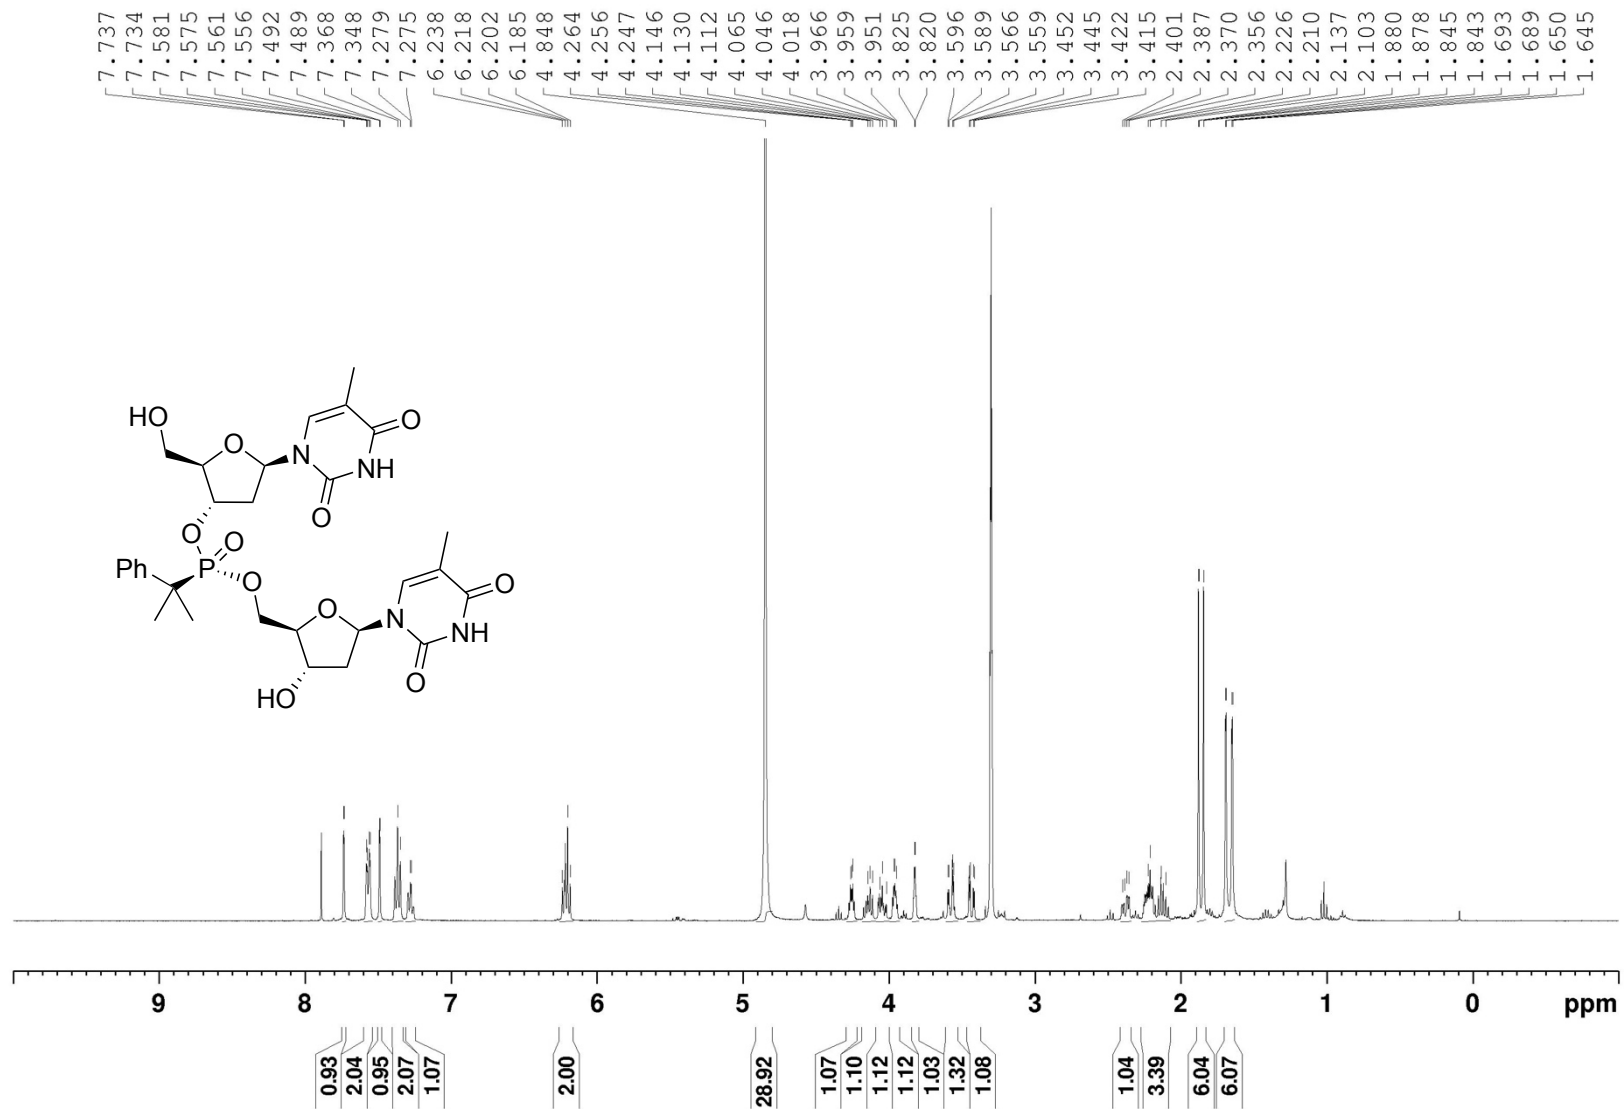

<sup>1</sup>H NMR (400 MHz, CD<sub>3</sub>OD) spectrum of **(*R<sub>P</sub>*)-3aa-1**

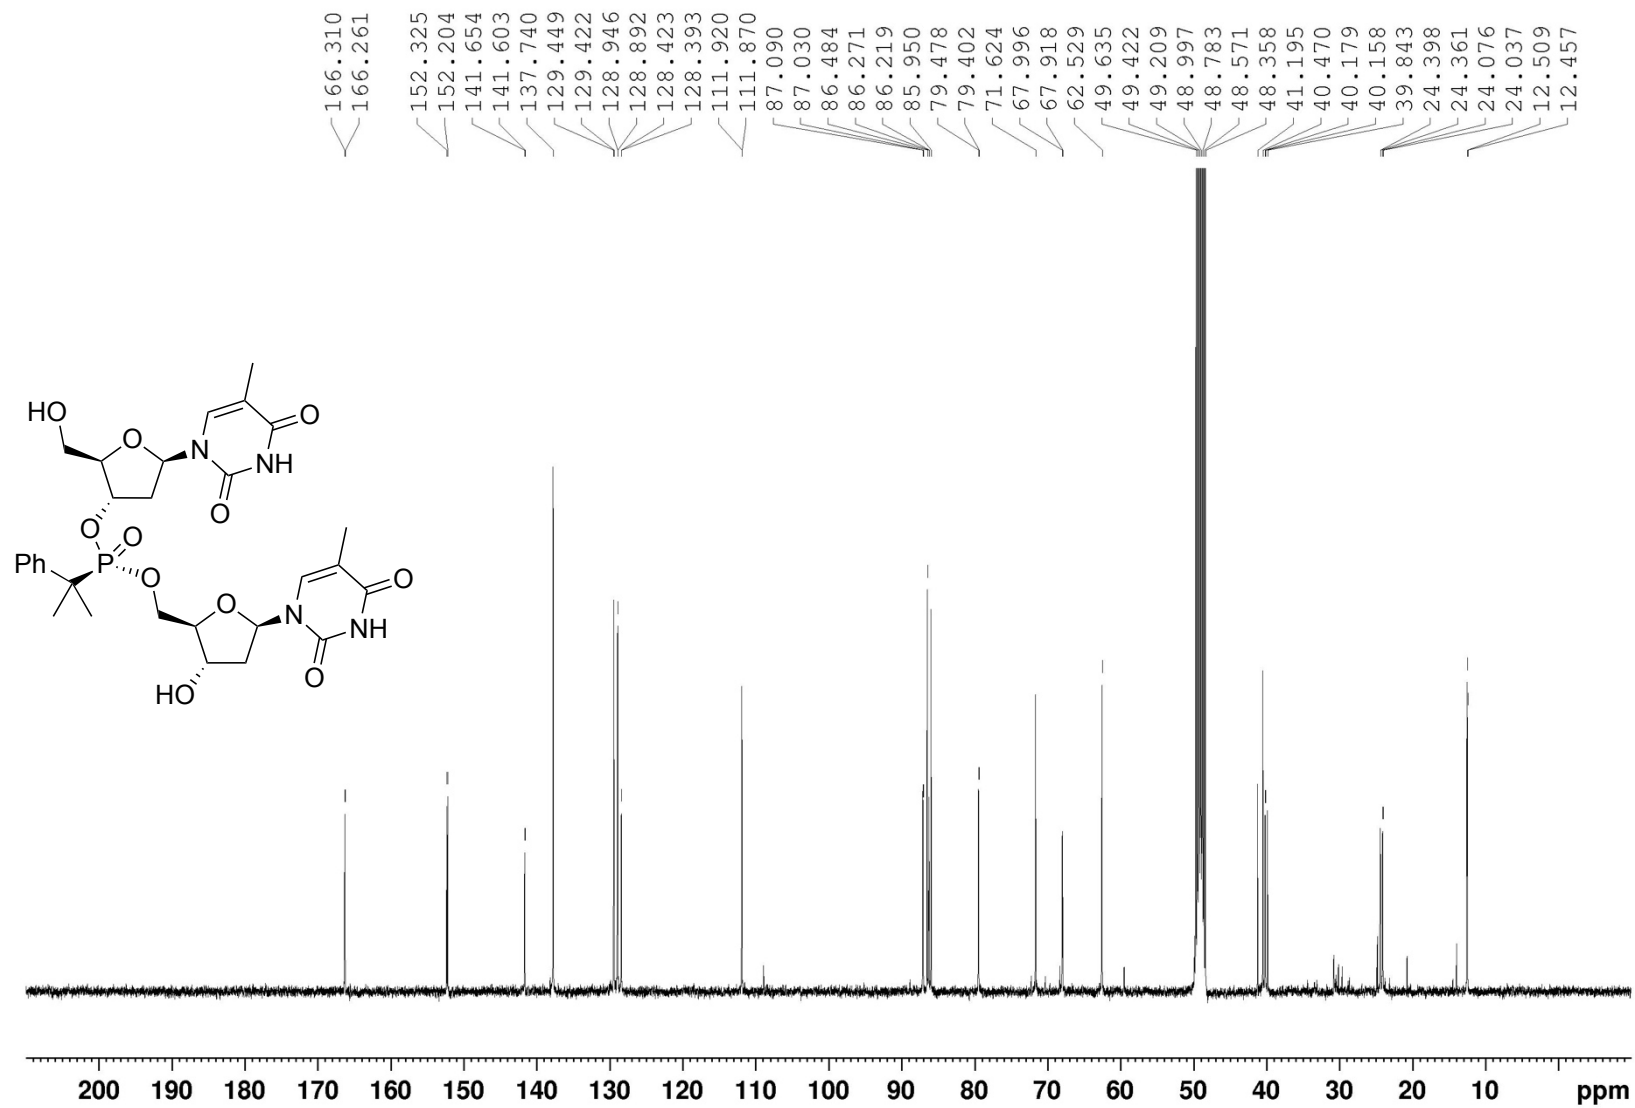

<sup>13</sup>C NMR (100.6 MHz, CD<sub>3</sub>OD) spectrum of (Rp)-3aa-1

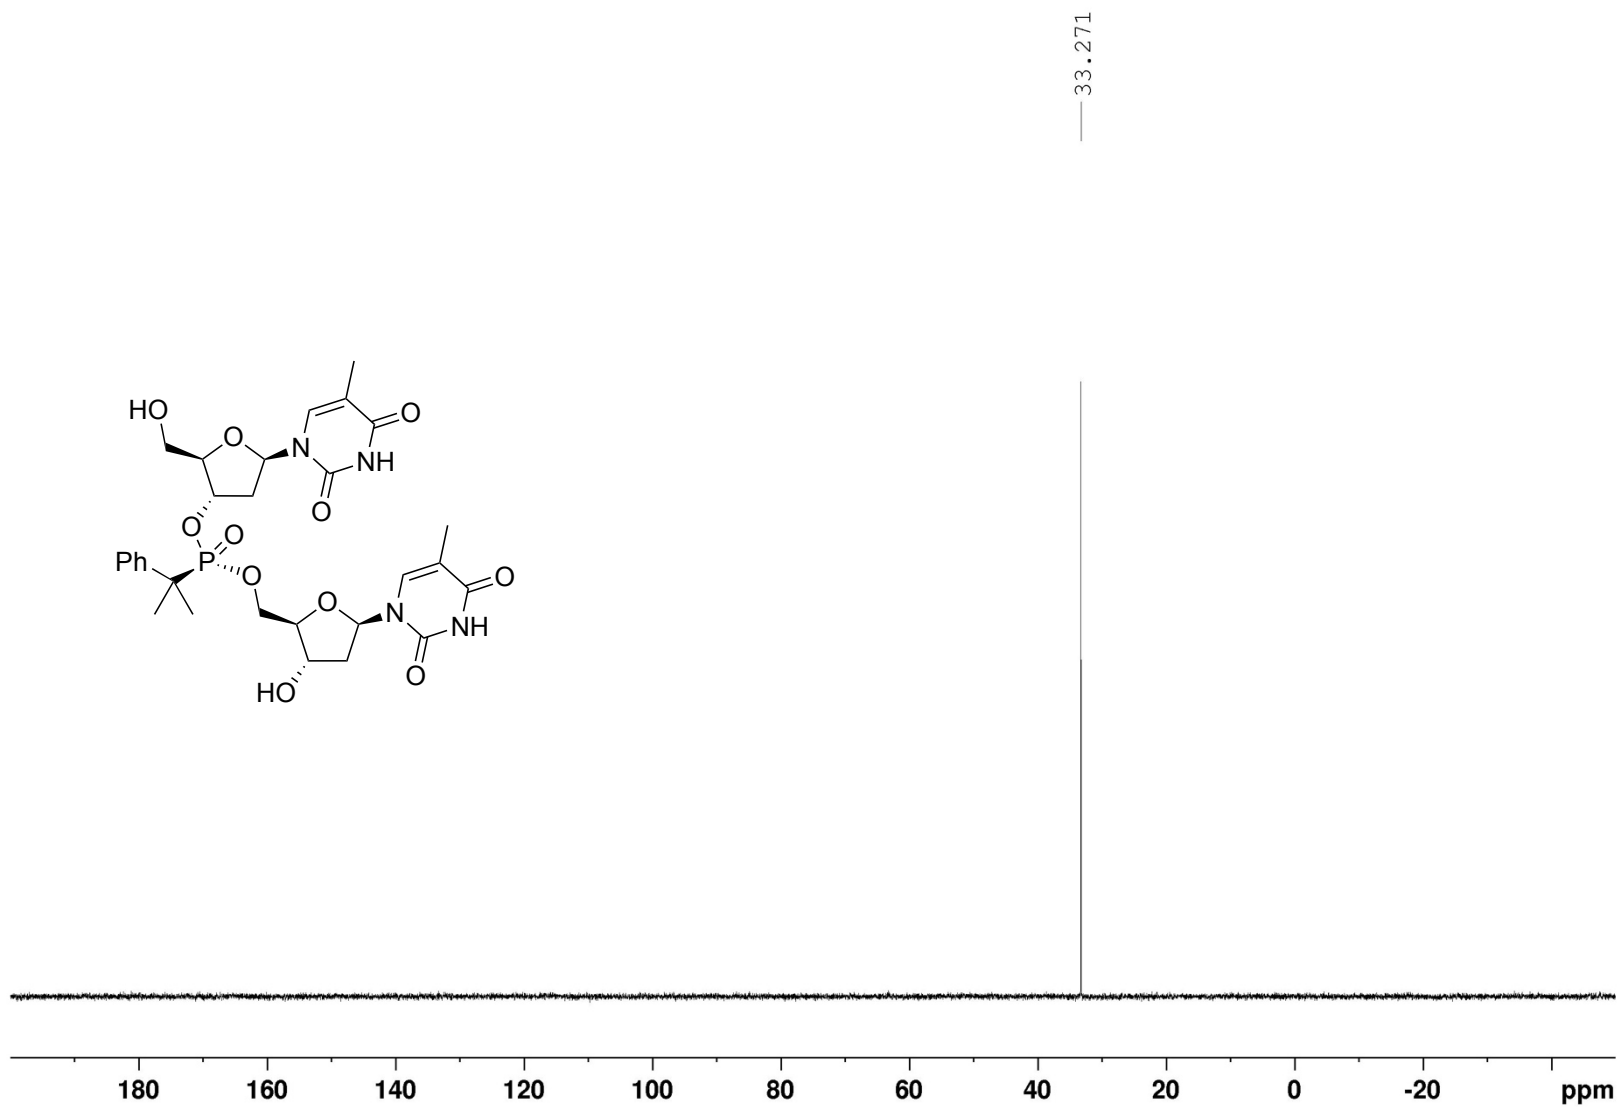

<sup>31</sup>P NMR (162 MHz, CD<sub>3</sub>OD) spectrum of *(R<sub>P</sub>)-3aa-1*

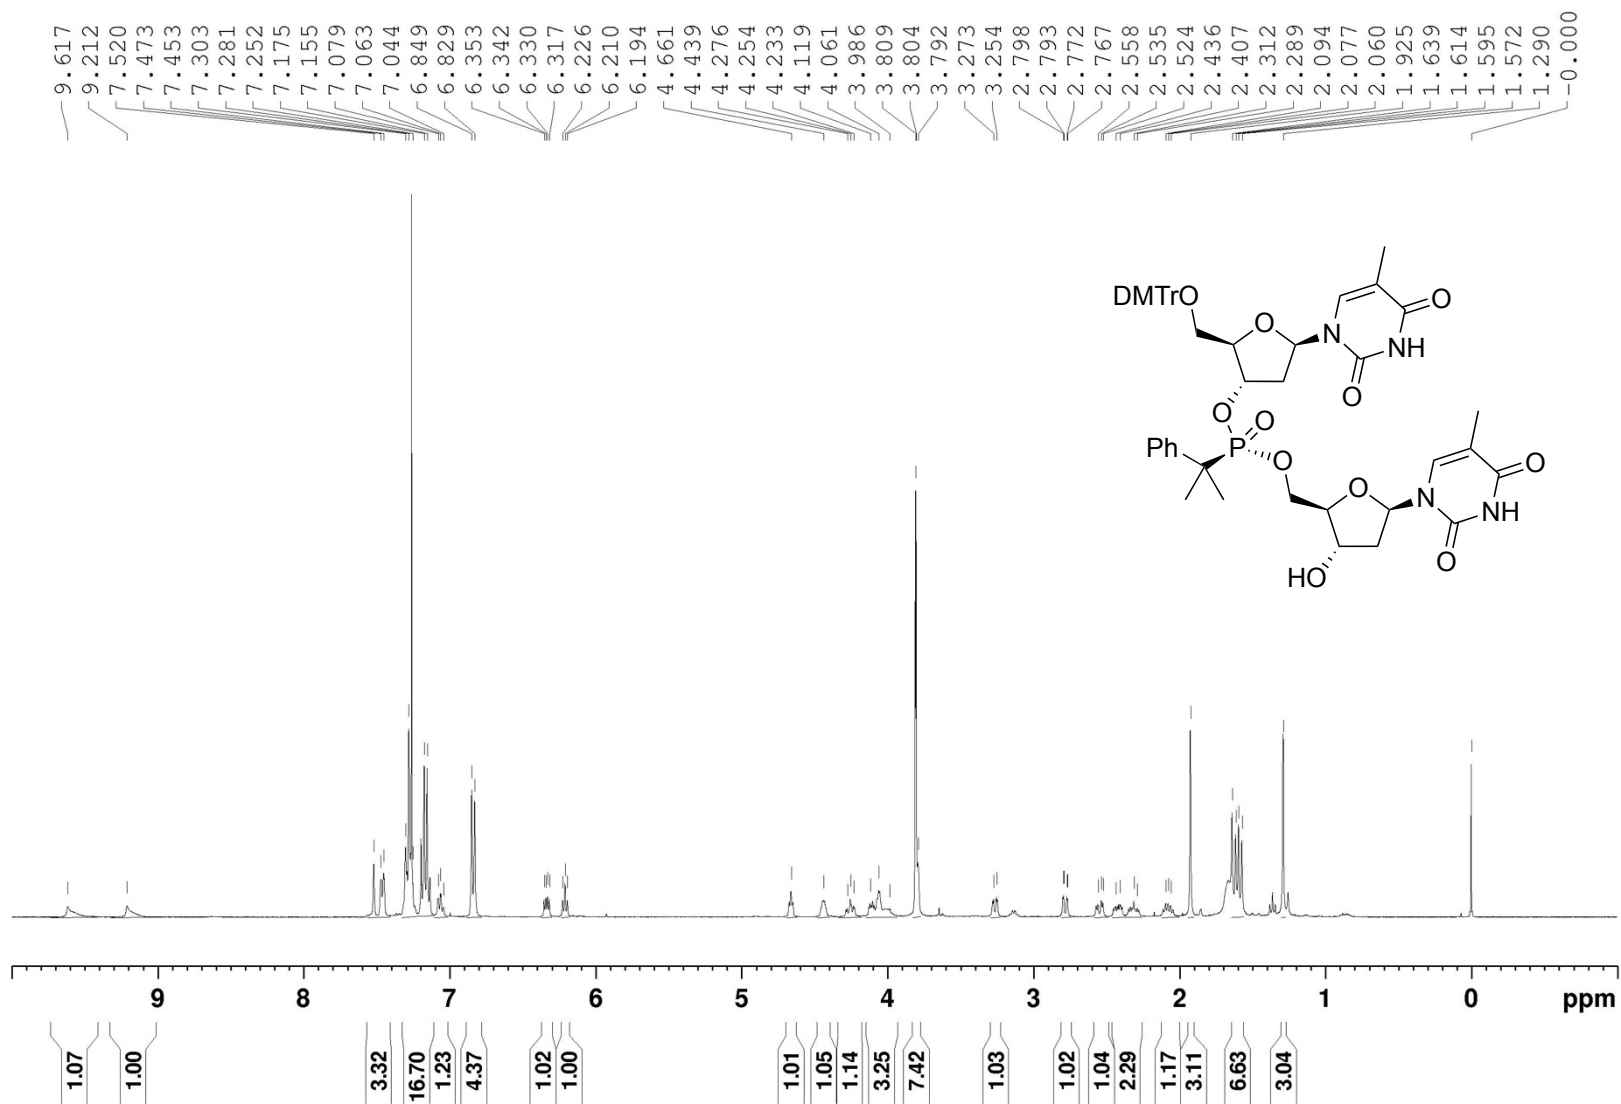

<sup>1</sup>H NMR (400 MHz, CDCl<sub>3</sub>) spectrum of **(*R<sub>P</sub>*)-3aa-2**

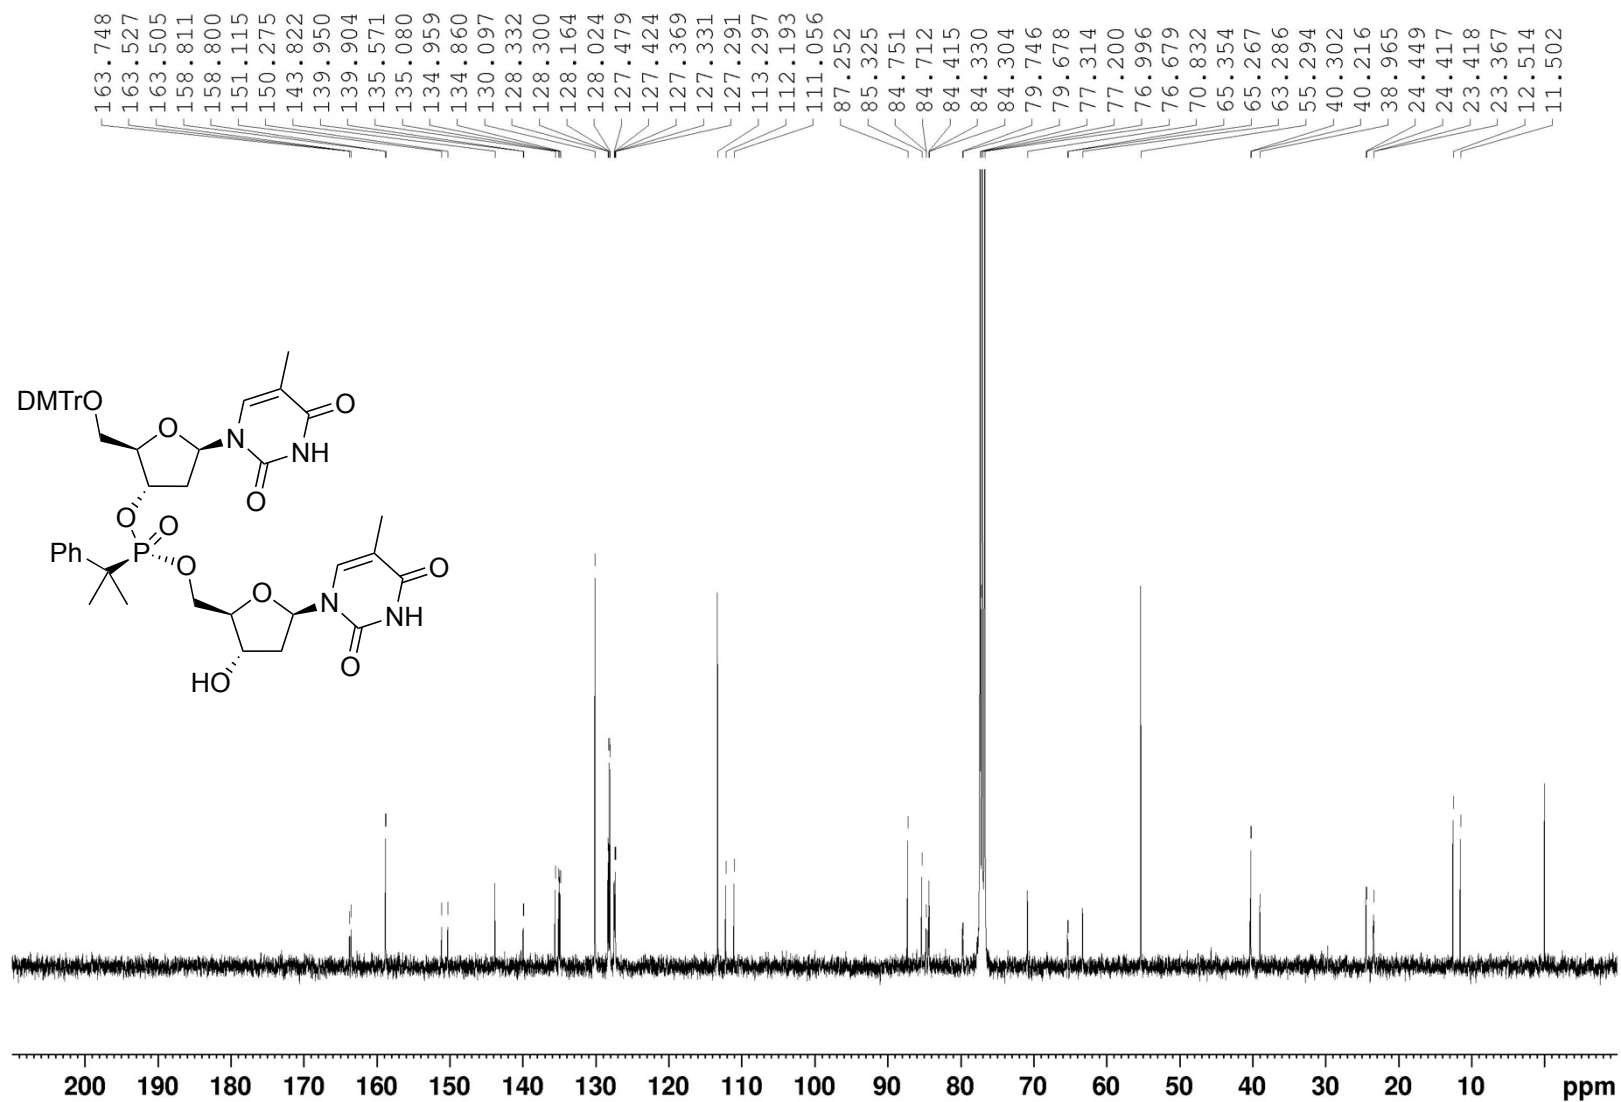

$^{13}\text{C}$  NMR (100.6 MHz,  $\text{CDCl}_3$ ) spectrum of  $(R_P)$ -3aa-2

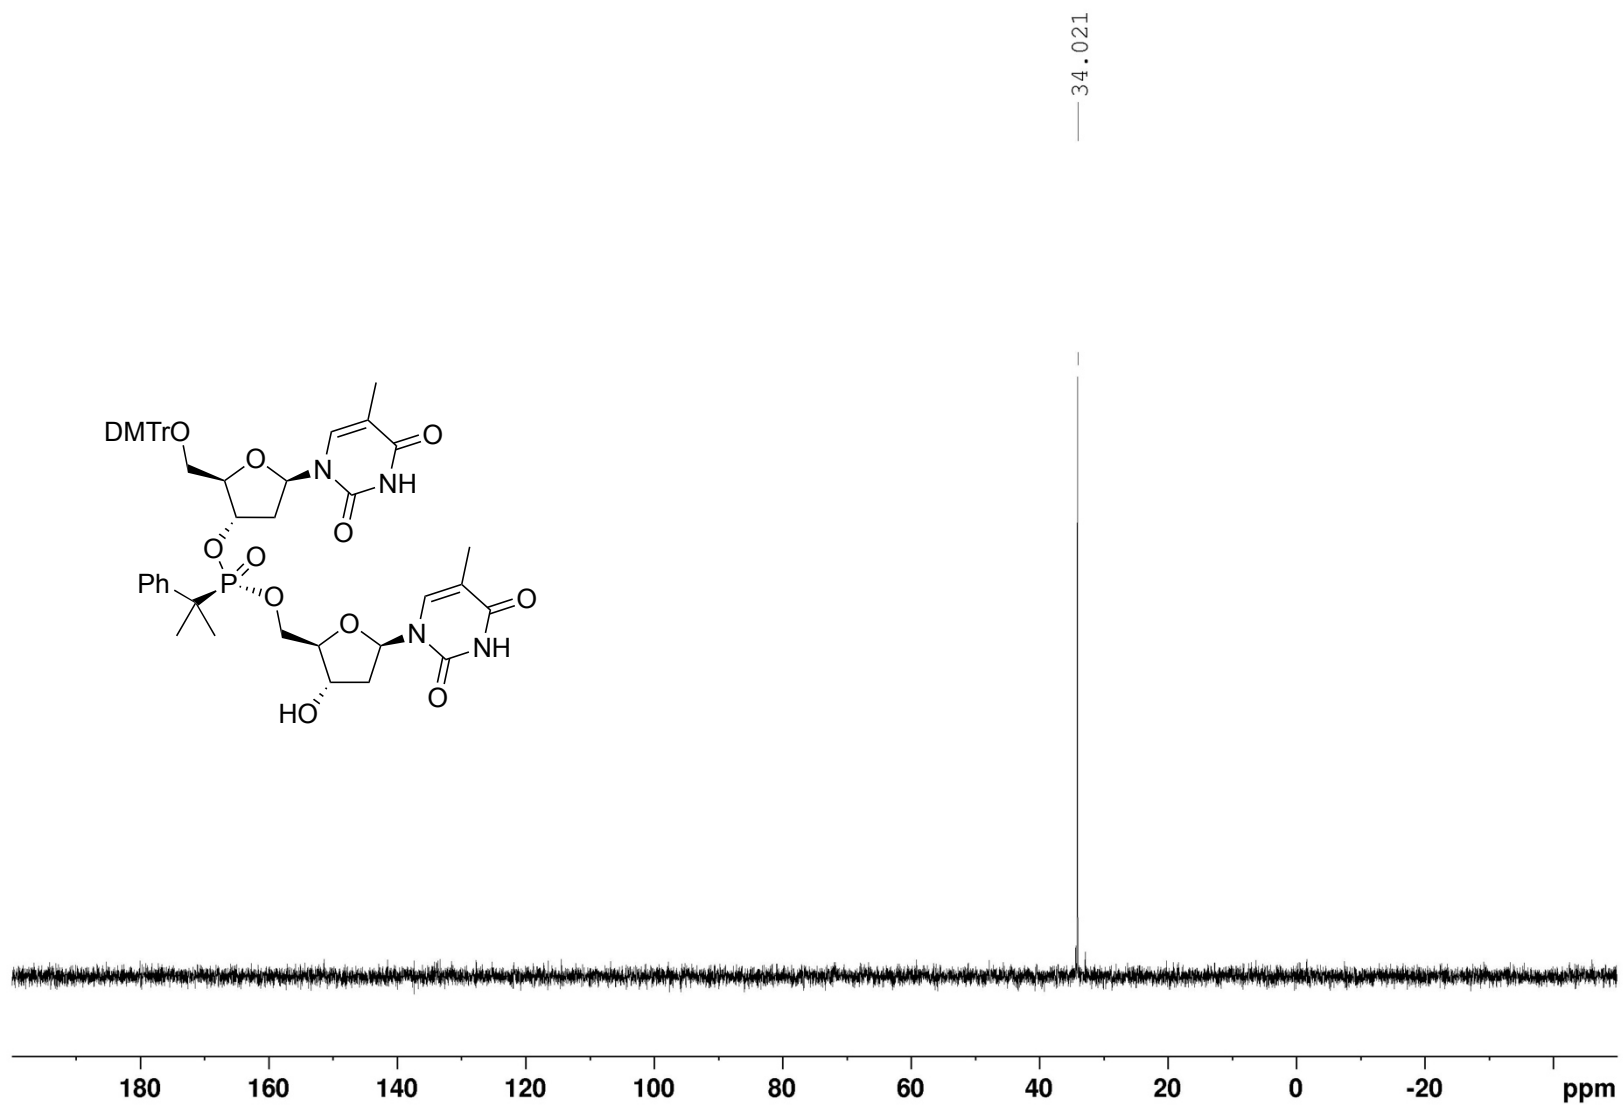

<sup>31</sup>P NMR (162 MHz, CDCl<sub>3</sub>) spectrum of *(R<sub>P</sub>)-3aa-2*

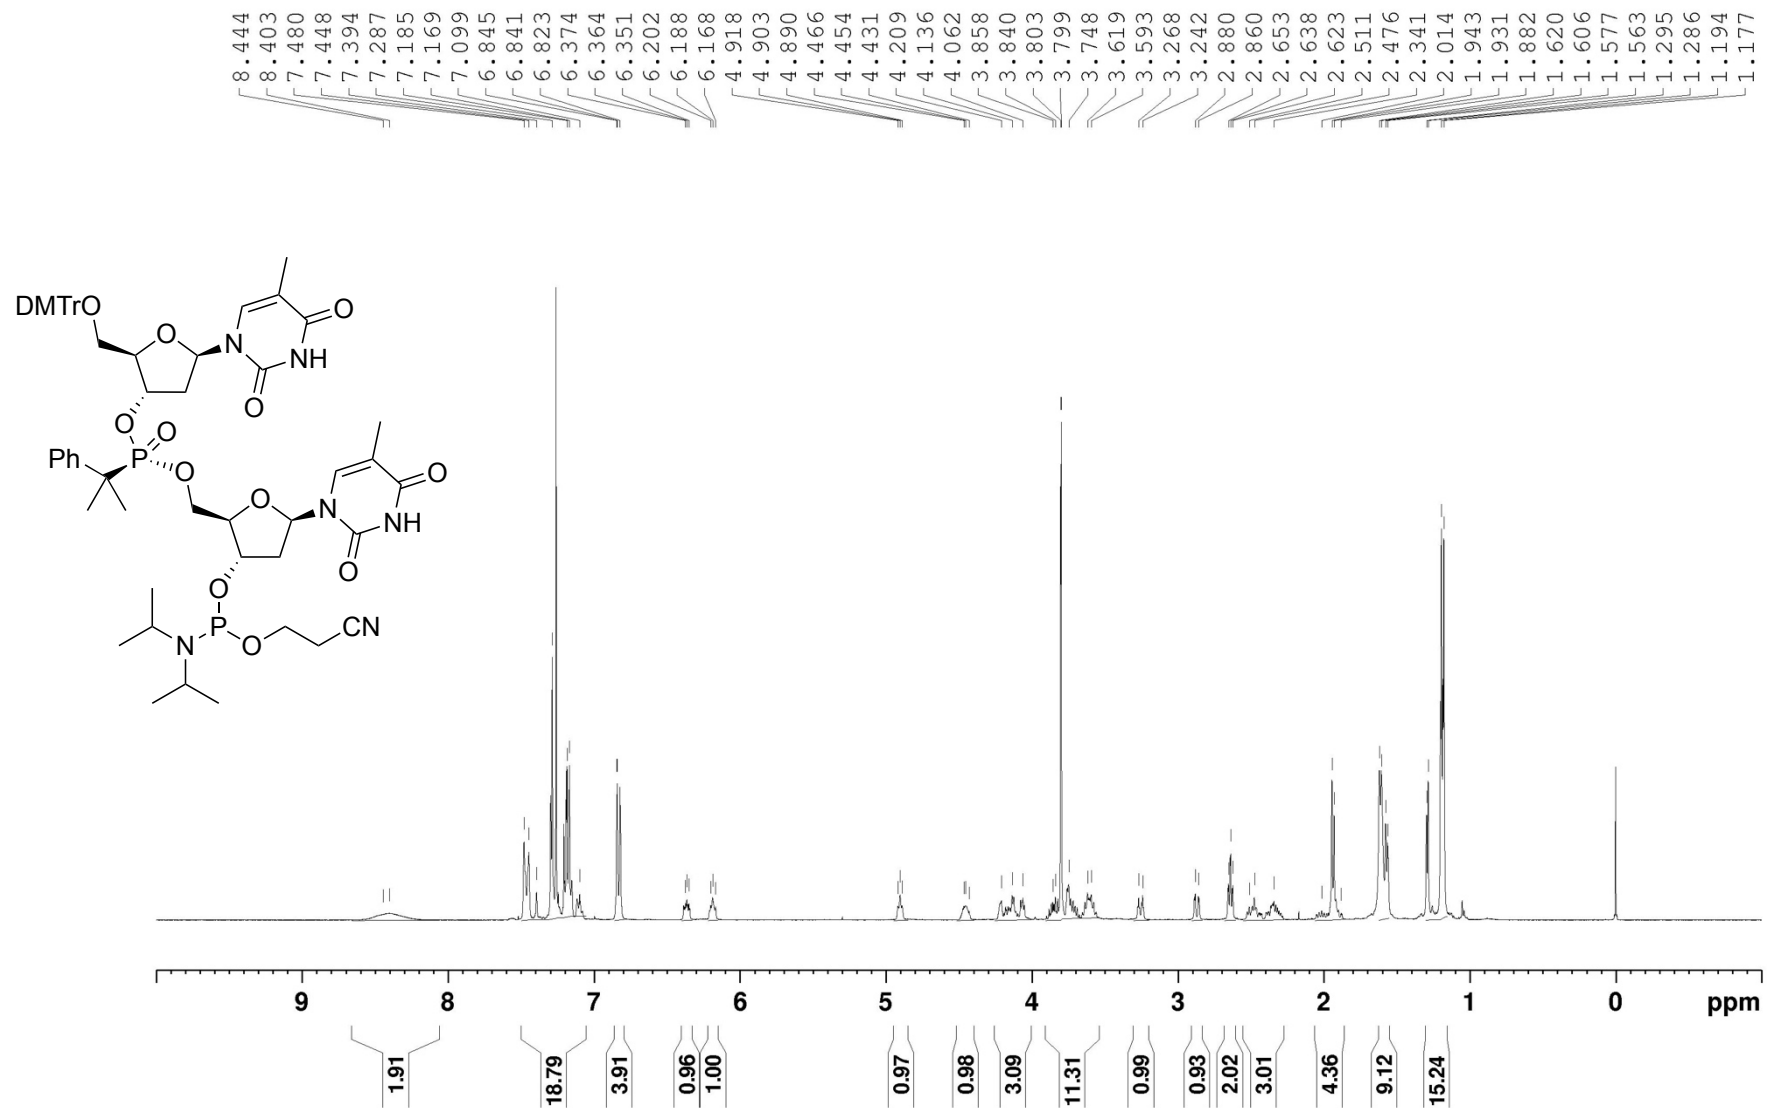

<sup>1</sup>H NMR (400 MHz, CDCl<sub>3</sub>) spectrum of **(*R<sub>P</sub>*)-3aa-3**



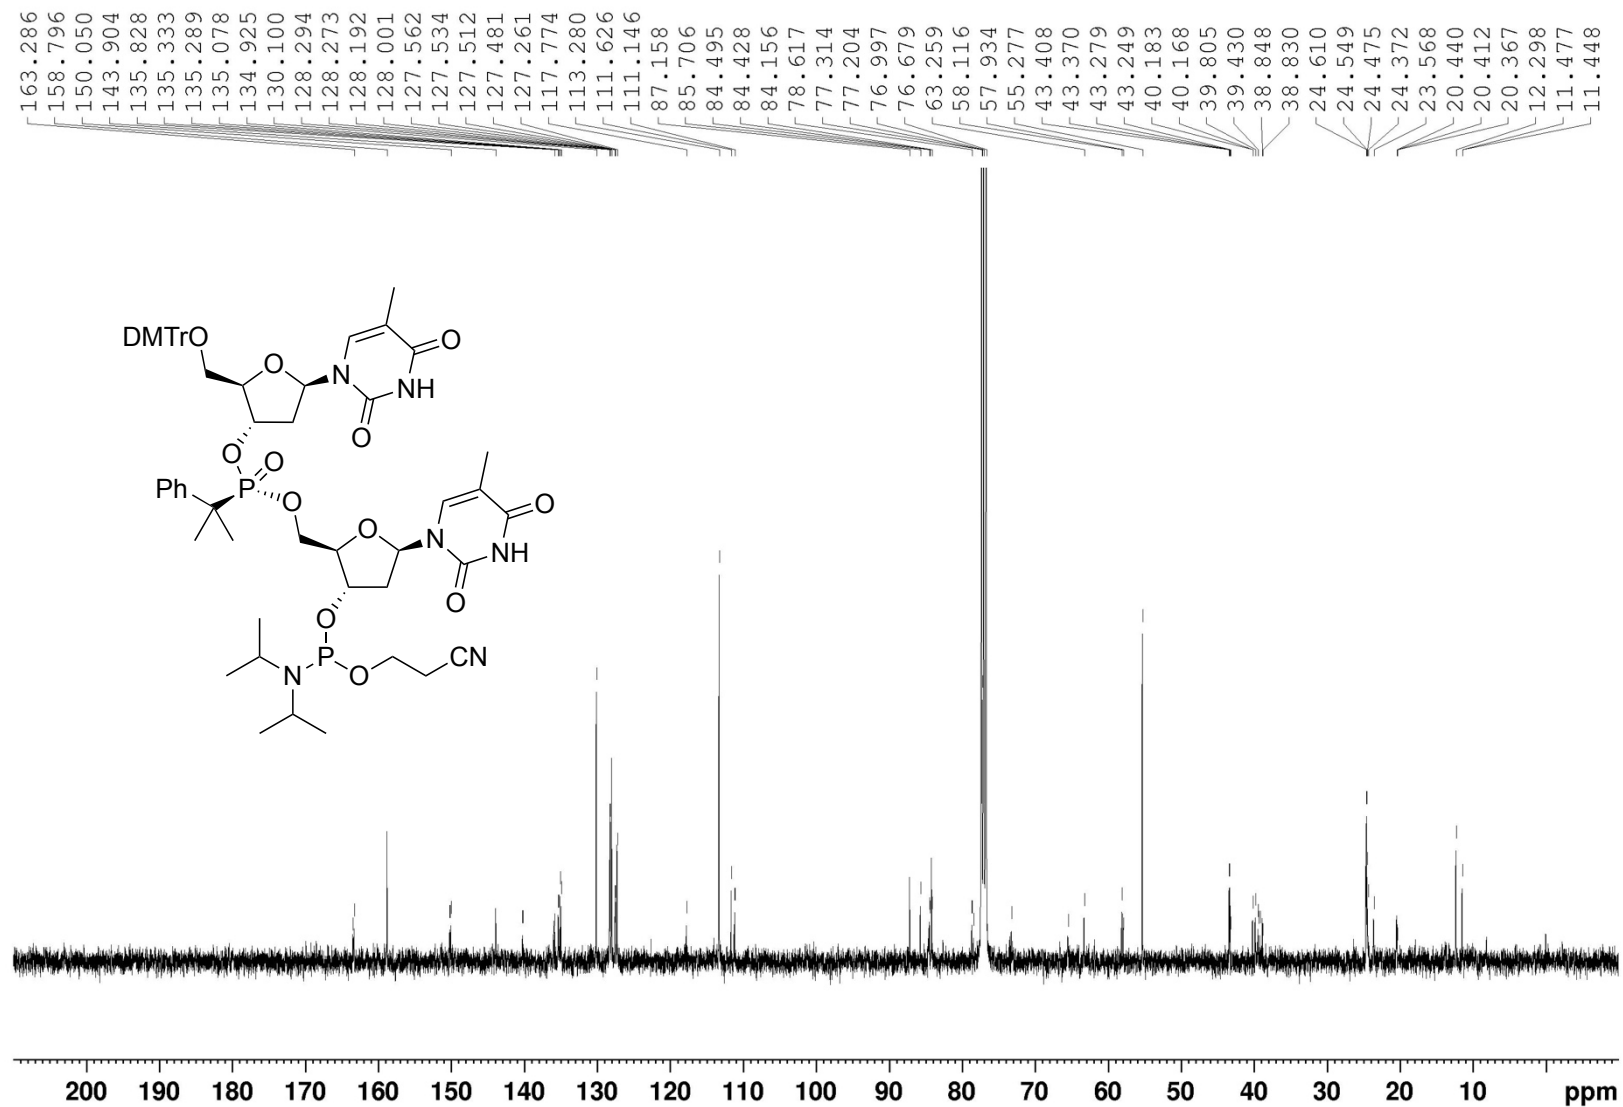

$^{13}\text{C}$  NMR (100.6 MHz,  $\text{CDCl}_3$ ) spectrum of (*R<sub>P</sub>*)-3aa-3

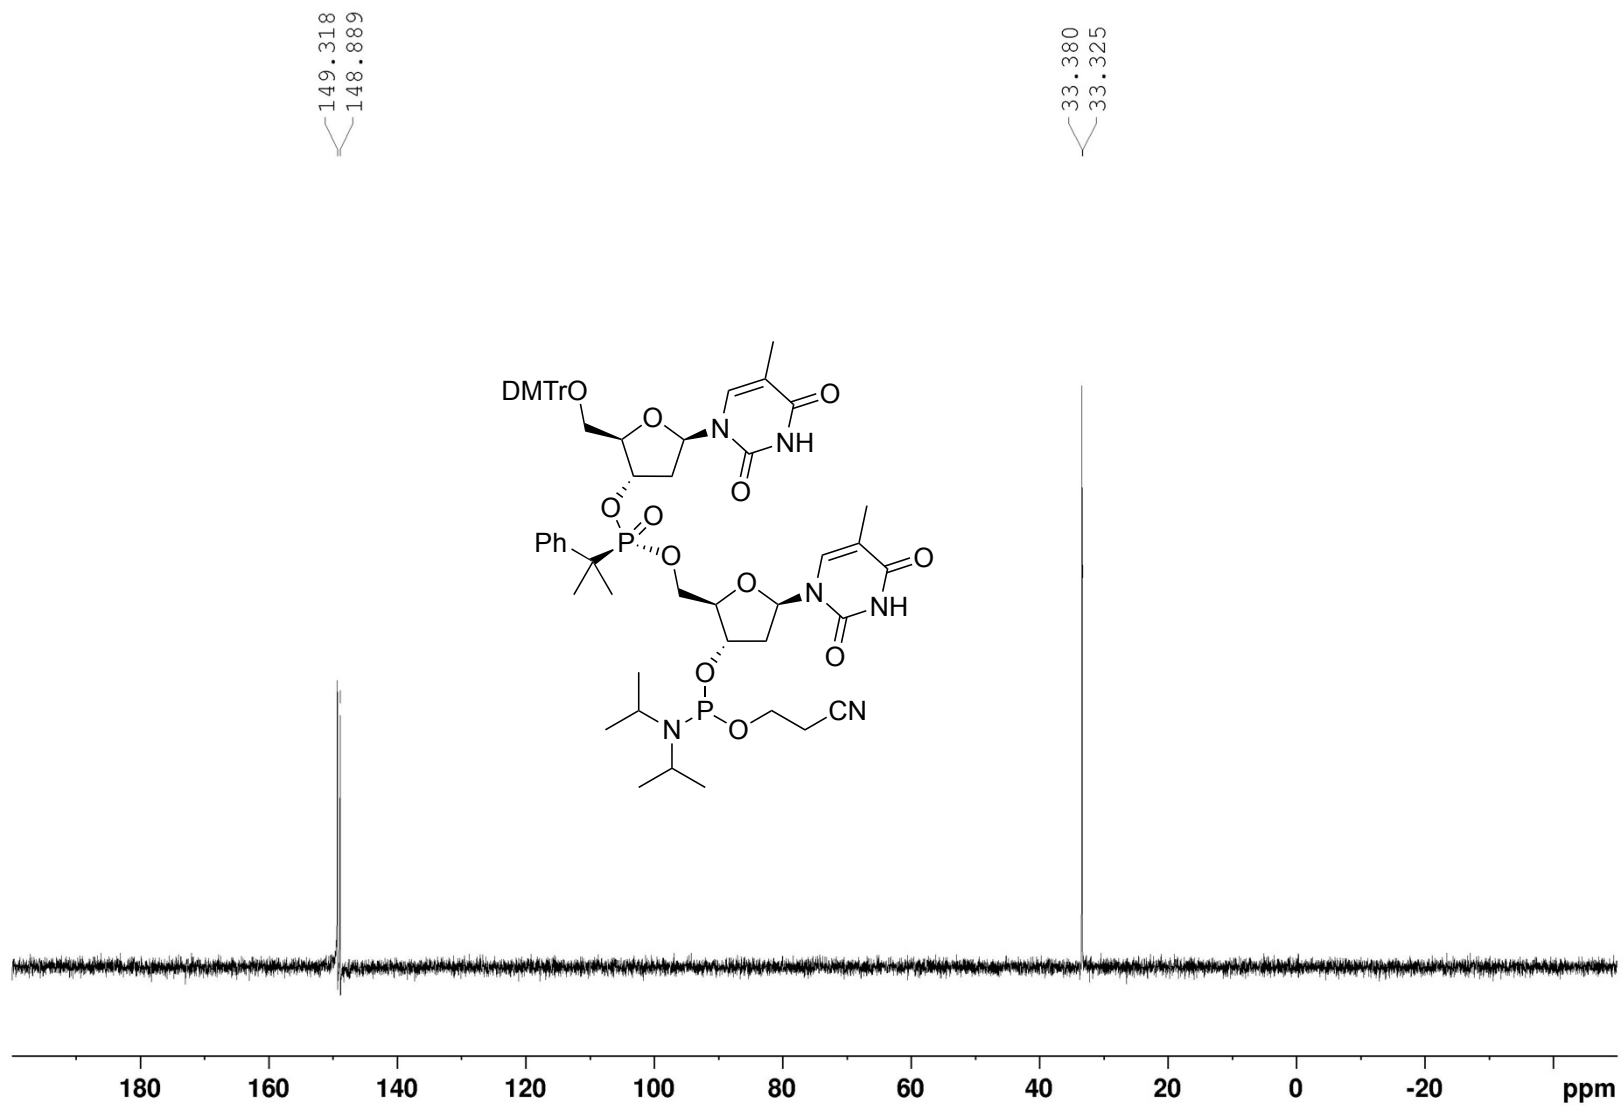

$^{31}\text{P}$  NMR (162 MHz,  $\text{CDCl}_3$ ) spectrum of **(*R*<sub>P</sub>)-3aa-3**

## ■ Supplementary References ■

- (1) Dadashi-Silab, S., Pan, X. & Matyjaszewski, K. Phenyl Benzo[*b*]phenothiazine as a Visible Light Photoredox Catalyst for Metal-Free Atom Transfer Radical Polymerization. *Chem. Eur. J.* **23**, 5972–5977 (2017).
- (2) Watanabe, M. et al. Spacer effects in metal-free organic dyes for visible-light-driven dye-sensitized photocatalytic hydrogen production. *J. Mater. Chem. A*, **2**, 12952–12961 (2014).
- (3) Ding, X. et al. Highly efficient phenothiazine 5,5-dioxide-based hole transport materials for planar perovskite solar cells with a PCE exceeding 20%. *J. Mater. Chem. A*, **7**, 9510–9516 (2019).
- (4) Münch, U. & Pfleiderer, W. Base-Labile Protecting Groups for the Oligoribonucleotide Synthesis. *Helv. Chim. Acta*, **84**, 1504–1517 (2001).
- (5) Sekine, M. et al. Studies on Steric and Electronic Control of 2'–3' Phosphoryl Migration in 2'-Phosphorylated Uridine Derivatives and Its Application to the Synthesis of 2'-Phosphorylated Oligouridylates. *J. Org. Chem.* **61**, 4087–4100 (1996).
- (6) Boers, R. B. et al. Synthesis and Spectroscopic Characterization of 1-<sup>13</sup>C- and 4-<sup>13</sup>C-Plastoquinone-9. *Eur. J. Org. Chem.* 2094–2108 (2002).
- (7) Gao, L. et al. Lewis Acid-Catalyzed Selective Reductive Decarboxylative Pyridylation of *N*-Hydroxyphthalimide Esters: Synthesis of Congested Pyridine-Substituted Quaternary Carbons. *ACS Catal.* **9**, 10142–10151 (2019).
- (8) Luo, J. & Zhang, J. Donor–Acceptor Fluorophores for Visible-Light-Promoted Organic Synthesis: Photoredox/Ni Dual Catalytic C(sp<sup>3</sup>)–C(sp<sup>2</sup>) Cross-Coupling. *ACS Catal.* **6**, 873–877 (2016).
- (9) Stemper, J. et al. Development of Chiral Phosphoric Acids based on Ferrocene-Bridged Paracyclophane Frameworks. *Adv. Synth. Catal.* **355**, 3613–3624 (2013).
- (10) Suzuki, M., Sekido, T., Matsuoka, S. & Takagi, K. Syntheses of Aliphatic Polycarbonates from 2'-Deoxyribonucleosides. *Biomacromolecules* **12**, 1449–1459 (2011).
- (11) Sheldrick, G. M. SHELXT - integrated space-group and crystal-structure determination. *Acta Crystallogr.* **A71**, 3–8 (2015).
- (12) Sheldrick, G. M. Crystal structure refinement with SHELXL. *Acta Crystallogr.* **C71**, 3–8 (2015).
- (13) Dolomanov, O. V., Bourhis, L. J., Gildea, R. J., Howard, J. A. K. & Puschmann, H. Olex2: A complete structure solution, refinement and analysis program. *J. Appl. Crystallogr.* **42**, 339–341 (2009).
- (14) Reich, D., Noble A., & Aggarwal V. K. Facile Conversion of  $\alpha$ -Amino Acids into  $\alpha$ -Amino Phosphonates by Decarboxylative Phosphorylation using Visible-Light Photocatalysis. *Angew. Chem.-Int. Ed.* **61**, e202207063 (2022).
- (15) Qing, X., TingTing, Z. & Libiao, H. Preparation method of large-steric-hindrance alkyl substituted phosphite diester. Patent no. CN110922427A (2020).
- (16) Meng, X. & Kim, S. Palladium(II)-Catalyzed Ortho-Arylation of Benzylic Phosphonic Monoesters Using Potassium Aryltrifluoroborates. *J. Org. Chem.* **78**, 11247–11254 (2013).
- (17) Eagon, S. et al. Enantioselective reduction of  $\alpha$ -substituted ketones mediated by the boronate ester TarB-NO<sub>2</sub>. *Tetrahedron Letters*. **51**, 6418–6421 (2010).
- (18) Hayashi, R., Shimizu, A. & Yoshida, J. The Stabilized Cation Pool Method: Metal- and Oxidant-Free Benzylic C–H/Aromatic C–H Cross-Coupling. *J. Am. Chem. Soc.* **138**, 8400–8403 (2016).
